# Supplementary material for: Effects of the COVID-19 pandemic on sleep health among Middle Eastern and North African (MENA) populations: a systematic review of the literature
Source: PubMed Central journal article supplement — BMJ Open. 2022 Dec 7;12(12):e066964. doi: 10.1136/bmjopen-2022-066964 (PMC9729847; doi:10.1136/bmjopen-2022-066964), 2022-12-07
Supplement: bmjopen-2022-066964.draft_revisions.pdf [file bmjopen-2022-066964.draft_revisions.pdf]

# BMJ Open

BMJ Open is committed to open peer review. As part of this commitment we make the peer review history of every article we publish publicly available.

When an article is published we post the peer reviewers' comments and the authors' responses online. We also post the versions of the paper that were used during peer review. These are the versions that the peer review comments apply to.

The versions of the paper that follow are the versions that were submitted during the peer review process. They are not the versions of record or the final published versions. They should not be cited or distributed as the published version of this manuscript.

BMJ Open is an open access journal and the full, final, typeset and author-corrected version of record of the manuscript is available on our site with no access controls, subscription charges or pay-per-view fees (<http://bmjopen.bmj.com>).

If you have any questions on BMJ Open's open peer review process please email [info.bmjopen@bmj.com](mailto:info.bmjopen@bmj.com)

# BMJ Open

## The Effects of the COVID-19 Pandemic on Sleep Health Among Middle Eastern and North African (MENA) Populations: A Systematic Review of the Literature

|                               |                                                                                                                                                                                                                                                                                                                                         |
|-------------------------------|-----------------------------------------------------------------------------------------------------------------------------------------------------------------------------------------------------------------------------------------------------------------------------------------------------------------------------------------|
| Journal:                      | <i>BMJ Open</i>                                                                                                                                                                                                                                                                                                                         |
| Manuscript ID                 | bmjopen-2022-066964                                                                                                                                                                                                                                                                                                                     |
| Article Type:                 | Original research                                                                                                                                                                                                                                                                                                                       |
| Date Submitted by the Author: | 02-Aug-2022                                                                                                                                                                                                                                                                                                                             |
| Complete List of Authors:     | Al-Ajlouni, Yazan; New York Medical College, Ta'ani, Omar; King Hussein Cancer Center Shamaileh, Ghaith; Tulane University School of Medicine Mushasha, Rand; Charité Universitätsmedizin Berlin Makarem, Nour; Columbia University Mailman School of Public Health Duncan, Dustin; Columbia University Mailman School of Public Health |
| Keywords:                     | COVID-19, Public health < INFECTIOUS DISEASES, SLEEP MEDICINE                                                                                                                                                                                                                                                                           |
|                               |                                                                                                                                                                                                                                                                                                                                         |

SCHOLARONE™  
Manuscripts

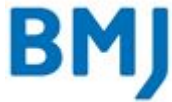

I, the Submitting Author has the right to grant and does grant on behalf of all authors of the Work (as defined in the below author licence), an exclusive licence and/or a non-exclusive licence for contributions from authors who are: i) UK Crown employees; ii) where BMJ has agreed a CC-BY licence shall apply, and/or iii) in accordance with the terms applicable for US Federal Government officers or employees acting as part of their official duties; on a worldwide, perpetual, irrevocable, royalty-free basis to BMJ Publishing Group Ltd ("BMJ") its licensees and where the relevant Journal is co-owned by BMJ to the co-owners of the Journal, to publish the Work in this journal and any other BMJ products and to exploit all rights, as set out in our [licence](#).

The Submitting Author accepts and understands that any supply made under these terms is made by BMJ to the Submitting Author unless you are acting as an employee on behalf of your employer or a postgraduate student of an affiliated institution which is paying any applicable article publishing charge ("APC") for Open Access articles. Where the Submitting Author wishes to make the Work available on an Open Access basis (and intends to pay the relevant APC), the terms of reuse of such Open Access shall be governed by a Creative Commons licence – details of these licences and which [Creative Commons](#) licence will apply to this Work are set out in our licence referred to above.

Other than as permitted in any relevant BMJ Author's Self Archiving Policies, I confirm this Work has not been accepted for publication elsewhere, is not being considered for publication elsewhere and does not duplicate material already published. I confirm all authors consent to publication of this Work and authorise the granting of this licence.

Abstract Word Count: 264  
Manuscript Word Count: 4665

The Effects of the COVID-19 Pandemic on Sleep Health Among Middle Eastern and North African (MENA) Populations: A Systematic Review of the Literature

Yazan A. Al-Ajlouni, MPhil<sup>1,2</sup>  
Omar Al Ta'ani, MD<sup>3</sup>  
Ghaith Shamaileh<sup>4</sup>  
Rand Mushasha, BDS<sup>5</sup>  
Nour Makarem, PhD<sup>2</sup>  
Dustin T. Duncan, ScD<sup>2</sup>

1. New York Medical College School of Medicine, Valhalla, New York, 10595, USA
2. Department of Epidemiology, Columbia University Mailman School of Public Health, New York, NY 10032, USA
3. King Hussein Cancer Center, Al Jubeiha, Amman, 11941, Jordan
4. Tulane University School of Medicine, New Orleans, LA 70112
5. Charité – Universitätsmedizin Berlin Charitéplatz 1, 10117 Berlin, Germany

Correspondence to: Yazan A. Al-Ajlouni, MPhil. New York Medical College School of Medicine, Valhalla, New York, USA 10595. Email: [alajlouni.yazan@gmail.com](mailto:alajlouni.yazan@gmail.com); Tel: +1 - 914 - 484 - 1014

## Abstract

**Objectives:** This study sought to conduct a systematic review of the literature on the impact of the COVID-19 pandemic on sleep health among Middle Eastern and North African (MENA) populations, understudied geographic regions including with regards to sleep health.

**Setting:** A systematic literature search including multiple databases was performed on March 27th, 2022, using developed keywords

**Participants: Studies were included if** they (1) investigated one or more aspects/dimensions of sleep health as an outcome (e.g., sleep duration, sleep quality, sleep problems); (2) measured the impact of a COVID-19 pandemic-related domain (e.g., impact of quarantine, work from home, lifestyle changes, etc.); (3) focused on at least one MENA region population; (4) were peer reviewed; (5) included  $\geq 100$  participants; (6) were written in English; (7) had full-text article publicly available.

**Primary and secondary outcomes measured:** Primary outcomes were sleep duration, sleep quality and sleep problems

**Results:** In line with PRISMA guidelines, 164 studies were included for data extraction. The Newcastle-Ottawa (NOS) scale for cross-sectional studies was used to assess the quality of the studies. Overall, the COVID-19 pandemic significantly impacted sleep duration, sleep quality, and presence and severity of sleep disorders in MENA populations, including adults, children, students, healthcare workers, and people with chronic illnesses. The directionality and strength of associations, as well as the determinants of sleep health, varied by sub-populations.

**Conclusions:** Longitudinal studies are needed to understand the longer-term impact of the COVID pandemic on the sleep health of MENA populations. Sleep health interventions and policy measures should be tailored to the need of each sub-population.

**Trial registration number:** PROSPERO registration number: CRD42022321128.

**Keywords:** COVID-19, Sleep Health, Middle East, Health behaviors, Pandemic

## Introduction

The COVID-19 pandemic, which was announced as a Public Health Emergency of International Concern on 30 January 2020, and a pandemic on 11 March 2020, continues to affect people's lives around the globe. Given the nature of transmission of the SARS-CoV-2 virus, in addition to lack of medication or vaccines in the early response of the pandemic, many of the public health interventions to prevent the transmission focused on physical distancing. Such measures included quarantine and lock-down orders. In turn, this affected people's ability to do many social and physical activities, hence significantly impacting people's 24-h behavioral patterns. Further, pandemic-related stress also contributed to abrupt changes in lifestyle behaviors.<sup>1,2</sup> For instance, Park et al., reported that COVID-19 has had a negative impact on healthy and active lifestyles, as well as mental health and quality of life, among a sample of adults in South Korea.

Emerging research is demonstrating that among the many health outcomes and health behaviors that may be affected by the pandemic is sleep health.<sup>3-7</sup> Prior studies among various populations have shown that the pandemic affected a variety of sleep health domains, including sleep quality,<sup>8-10</sup> sleep duration,<sup>11, 12</sup> and sleep disorders.<sup>13, 14</sup> For instance, in a longitudinal study in Spain, Martínez-de-Quel reported that perceived sleep problems significantly increased following the onset of the pandemic.<sup>15</sup> Similarly, among 400 students and university administration staff workers in Italy, the prevalence of insomnia increased from 24% prior to the pandemic to 40% during the pandemic. Similarly, difficulties in sleep initiation among the same sample increased from 15% to 42% from before to during the pandemic.<sup>16</sup> A systematic review conducted in July 2020 showed that the prevalence of sleep problems during the COVID-19 pandemic is high and affects approximately 40% of people from the general and health care populations.<sup>17</sup> In addition to the observed trend in sleep health outcomes, the pandemic may have exacerbated a number of stressors that can directly increase poor sleep health. For instance, emerging research has shown an increase in intimate partner violence (IPV) due to lockdown measures, as well as economic and psychological stress brought about by the pandemic.<sup>18-20</sup> In turn, IPV has been linked with poor sleep quality and sleep disturbances among different populations.<sup>21, 22</sup>

Among Middle Eastern and North African (MENA) populations, the burden of non-communicable diseases has drastically increased from 1990 to 2010.<sup>23</sup> The epidemiological profile of Middle Eastern countries closely resembles that of countries in western Europe, the USA, and Canada, with health loss from most non-communicable diseases, such as CVD and cancer, increasing over the past 20 years.<sup>23</sup> However, Middle Eastern populations are faced with multiple challenges when attempting to deal with such an epidemiological profile. Indeed, political turmoil, conflict, and corruption within states have led to challenges in implementing policies and laws, as well as adhering to them on a population-level.<sup>24</sup> Additionally, while Middle Eastern populations are facing an epidemiological challenge similar to that of the developed world, they continue to be understudied in public health research including sleep health research. In part, this is due to Arab countries having weak health information systems,<sup>25, 26</sup> which limits data availability and produces major challenges for sound research and evidence-based policy making.

In addition, MENA countries epidemiological profile is characterized by high burden of psychosocial problems, including depression and anxiety.<sup>23</sup> Noncommunicable diseases and

1  
2  
3 psychosocial problems, among other health outcomes, are consistently associated with sleep  
4 health.<sup>27-31</sup> Consequently, this exacerbation in poor sleep health that may be brought about by the  
5 pandemic can increase the risk of other undesirable health outcomes among populations. This  
6 issue is of increased urgency in areas with underdeveloped health research infrastructure where  
7 there continues to be lack of full understanding of the health of the population, as is the case in  
8 the MENA region.  
9  
10

11 Given the evident impact the pandemic had on sleep health worldwide, as well as the well-  
12 documented association between sleep health and the leading causes of morbidity and mortality,  
13 it is important to understand this association among Middle Eastern populations. This systematic  
14 review sought to summarize the evidence in the literature regarding the impact of the COVID-19  
15 pandemic on aspects of sleep health among Middle Eastern adults. To the best of our knowledge,  
16 this is the first systematic review investigating sleep health among Middle Eastern populations in  
17 the context of COVID-19. Additionally, and while there are several reviews examining sleep health  
18 domains in developed countries,<sup>32, 33</sup> there continues to be a lack of reviews studying sleep health  
19 in Middle Eastern and North African countries, which collectively represent ~600 million of the  
20 world population. In fact, this systematic review would be the first to summarize the literature on  
21 the sleep health of Middle Eastern and North African populations, filling an important gap in the  
22 literature.  
23  
24  
25  
26  
27  
28  
29  
30  
31  
32  
33  
34  
35  
36  
37  
38  
39  
40  
41  
42  
43  
44  
45  
46  
47  
48  
49  
50  
51  
52  
53  
54  
55  
56  
57  
58  
59  
60

## Methods

A systematic literature search was performed in accordance with PRISMA (Preferred Reporting Items for Systematic Reviews and Meta-Analyses) guidelines.<sup>34</sup> On March 27th, 2022, we conducted a systematic literature review on multiple databases, including PubMed, MEDLINE, Embase, CINAHL, and Web of Science. A set of specific keywords and MeSH terms was developed and is shown in supplementary table S1. The protocol of this systematic review is registered with PROSPERO (international prospective register of systematic reviews) with the ID CRD42022321128.

### *Search Strategy and Selection Criteria*

The authors developed a set of keywords relevant to the research question and the population investigated. Boolean operators were used to ensure full inclusion of words within the keywords used. Using Endnote referencing software, retrieved articles were entered and duplicates were identified and removed. Following that, articles were entered into Rayyan, a free web-tool for screening articles for systematic reviews. As shown in figure 1, title and abstract screening was conducted by two investigators (OT and YAA) independently. Next, full-text articles were accessed and screened in more depth. Conflicts were solved by discussion upon the conclusion of the screening process. The articles included were deemed eligible against the following criteria: (1) investigated an aspect sleep health as an outcome of interest (e.g., sleep duration, quality and presence of a sleep problem or disorder); (2) investigated a domain related to the COVID-19 pandemic induced lifestyle changes (e.g., lockdown, online schooling, etc.); (3) focused on at least one MENA population (supplementary table S2 includes a list of all MENA countries included); (4) were peer reviewed; (5) sample size  $\geq$  100 participants (6) were written in English; (7) had full-text article publicly available. Similarly, articles were excluded if they met at least one of the following: (1) were not written in English; (2) were not peer-reviewed; (3) did not have full-text available. Where multiple articles reported data from the same dataset, we selected the article with the largest numbers of variables included and excluded the other articles as duplicates.

### *Data Extraction*

Data extraction was done in accordance with a tabulated form. Two reviewers (OT and YAA) collectively performed the data extraction into a template table. Conflicts were resolved through a discussion and where necessary, a third reviewer. Data was categorized based on sub-populations identified, including adults, children, healthcare workers, students, and people with chronic illnesses. Other dimensions collected for each study included: (1) the first author and year of publication (e.g., reference); (2) location of the study (city and/or country); (3) study population of interest; (4) study sample size; (5) study design; (6) sleep health measurement tool; (7) sleep health domains; (8) main findings summarized.

### *Data Presentation*

All data extracted from identified studies were presented in a tabulated form organized according to the different sub-populations identified among MENA populations. This included: 1) adults; 2) children; 3) healthcare workers; 4) students; 5) people with chronic illnesses. Main summary



1  
2  
3 findings were presented in the tables, in addition to identifying specific factors that were  
4 associated with poor sleep health outcomes.  
5

### 6 *Quality Appraisal*

7  
8 Given that the majority of the studies identified were cross-sectional in design, The Newcastle-  
9 Ottawa scale (NOS) was used to assess the quality of the studies. Two reviewers (YAA and OT)  
10 independently assessed the risk of bias in all cross-sectional studies. Where necessary, conflicts  
11 in scoring were resolved by discussion. Only cross-sectional studies were scored against the  
12 NOS, yielding a total of 157 studies for risk assessment. The NOS was developed to assess the  
13 quality of nonrandomized studies according to different domains of the studies, including the  
14 study's design, content, and ease of use directed to the task of incorporating the quality  
15 assessments in the interpretation of meta-analytic results. In accordance with the NOS, the  
16 studies were scored against 7 different categories, including (1) selection (4 sub-categories, 4  
17 stars maximum); (2) comparability (1 sub-category; 2 stars maximum); (3) outcome (2 sub-  
18 categories; 3 stars maximum). The full list of adapted questions from the NOS is attached as a  
19 supplementary file. Additionally, the results of the NOS assessment for our included cross-  
20 sectional studies are shown in supplementary table S3.  
21  
22  
23  
24

### 25 *Ethical Approval*

26  
27 Ethical approval for this specific systematic review is not applicable since data utilized was  
28 collected from previously published research in the literature. All studies included in this review  
29 received ethical approval prior to data collection by their primary investigator.  
30

### 31 *Patient and Public Involvement*

32  
33 Patients and public were not involved in the design and conduct of this research  
34  
35  
36  
37  
38  
39  
40  
41  
42  
43  
44  
45  
46  
47  
48  
49  
50  
51  
52  
53  
54  
55  
56  
57  
58  
59  
60

## Results

### 3.1. Search results

As illustrated in figure 1, the systematic literature search yielded 683 studies from PubMed, 152 studies from MEDLINE, 285 studies from Embase, 63 studies from CINAHL, and 110 studies from Web of Science, resulting in a total of 1,293 studies. After removing duplicates (n = 338), 955 articles were screened independently by two investigators for title and abstract to determine relevance to our research question. This step excluded an additional 721 articles either because they did not investigate sleep health as one of the outcomes (n = 535), did not include people from the Middle East, (n = 153), or were not peer reviewed (n = 33). After this step, two independent investigators performed full-text screening on 234 potentially relevant articles. A total of 70 studies were excluded at this stage, mainly due to studies with unavailable full-text article (n=14), studies not reporting sleep health as an outcome (n=24), studies conducted explicitly outside the Middle East (n=24) or had a sample size of less than 100 participants (n = 8). As a result, a total of 164 articles were included in this review.

### 3.2. Study characteristics

The sample size of all included studies (n=164) ranged from 103 to 20,697 participants. Table S4 in the supplementary file presents a full list of all included studies and their extracted data. Furthermore, studies included were conducted across 17 Middle Eastern countries, including Turkey (n=44), Saudi Arabia (n=33), Iran (n=16), Israel (n=12), Jordan (n=12), Egypt (n=10), Oman, (n=6), United Arab Emirates (n=6), Lebanon (n=6), Kuwait (n=4), and Qatar (n=2). Only one study was conducted in each of the following countries: Bahrain, Palestine, Cyprus, and Iraq. Additionally, 11 studies included samples from multiple countries at once, including Syria, Yemen, Iraq, and others.

### 3.3. Quality appraisal

Most studies in this review were cross-sectional in design (n=156). All other study designs were longitudinal (n=8). Table S3 in the supplementary file presents the full NOS results for all studies assessed for bias, determined using the NOS protocol outlined in the Methods section. Most studies were moderate in quality.

### 3.4. Sleep health outcomes by sub-population

Data from all eligible studies was organized according to population type, with a total of five sub-populations. These included studies focusing on adults in the general population (n=74), healthcare workers (n=47), students (n=21), children (n=15), and people with chronic illnesses (n=7). For all populations, qualitative data synthesis was conducted with a focus on three main domains: sleep duration, sleep quality, and sleep disorders.

#### 3.4.1. Adults

1  
2  
3 Across the studies conducted among adults (n=74), the sample size ranged from 103 to 14,171  
4 participants.  
5

### 6 *Sleep Duration*

7  
8  
9 Studies consistently reported that the pandemic negatively impacted the sleep duration of Middle  
10 Eastern adults, with 49.6% of participants reporting that they were sleeping less than 7 hours and  
11 53.2% reporting 10 or more hours of sleep.<sup>35</sup> In Egypt, 23.1% of adults younger than 30 years old  
12 reported inadequate sleeping (< 6h/day).<sup>36</sup> In terms of determinants of sleep duration among  
13 adults, data from Jordan revealed an increased burden of short sleep duration among males  
14 compared to females. Similarly, participants with higher education levels reported decreased  
15 daytime sleeping hours.<sup>37</sup> In terms of relationship status, individuals who reported being single  
16 had significantly increased amount of sleep compared to married individuals.<sup>37</sup>  
17  
18

### 19 *Sleep Quality*

20  
21  
22 Sleep quality (SQ) was altered for both COVID-19 patients and healthy individuals.<sup>38</sup> The  
23 Pittsburgh Sleep Quality Index (PSQI) score during lockdown was predominantly influenced by  
24 sleep-onset latency, sleep efficiency, and total sleep time.<sup>39</sup> Factors associated with reduced SQ  
25 included changes in sleeping habits, anxiety, fear driven by COVID-19 news and lack of treatment  
26 knowledge, female gender, monthly income, isolation,<sup>40</sup> perceived income, hours spent outdoors,  
27 the number of familiar people with COVID-19, and history of depression.<sup>41</sup>  
28  
29

### 30 *Sleep Problems*

31  
32 Most families reported disrupted sleep patterns.<sup>42</sup> When quarantine period started in Saudi  
33 Arabia, 1/5 experienced new-onset nightmares, more significant among females.<sup>43</sup> In a global  
34 cross-sectional study including a number of Middle Eastern countries, around 33.3% of  
35 respondents reported feeling lazy and less energized during the pandemic, as opposed to 4.7%  
36 before the pandemic.<sup>44</sup> The prevalence of insomnia, anxiety, depression, and obesity increased  
37 with increasing phone screen time among university students. Of all countries, Iran reported the  
38 highest prevalence of insomnia among adults (55.2%),<sup>45</sup> which affected fewer COVID-19 patients  
39 (50.5%) than control group patients (58.5%).<sup>38</sup> Finally, In a Turkey-based study among pregnant  
40 women, mild sleepiness was found in 88.2% of participants (n = 356), while severe sleepiness  
41 was reported in 11.8% of the same sample.<sup>46</sup>  
42  
43  
44

### 45 *3.4.2. Children*

46  
47 A total of 15 studies assessed sleep health among children. The sample size of studies ranged  
48 from 309 to 20,697 participants.  
49

### 50 *Sleep Duration*

51  
52  
53 Most studies in the literature reported a change in the sleeping duration among children, with  
54 varying directions of change (e.g., increased or decreased duration). In Saudi Arabia and Jordan,  
55 decreased sleep was reported among children's populations.<sup>47, 48</sup> Moreover, sleep duration in  
56  
57  
58  
59  
60

1  
2  
3 Israel increased for 13.4% of participants, decreased for 51.1%, and remained unchanged for  
4 35.1%. Sleeping less than seven hours decreased from 41.4% to 5.4%, while sleeping more than  
5 10 hours significantly increased from 4.8% to 49.7%.<sup>49</sup> In Iran 13.4% of children, mostly from  
6 urban areas, reported that they had 5 or fewer hours of sleep.<sup>50</sup>  
7

### 8 *Sleep Quality*

9

10 In Turkey, 61.5% of children experienced sleeping changes due to the pandemic.<sup>51</sup> Almhizai et al.,  
11 demonstrated that older participants woke up more frequently during their sleep compared to  
12 children.<sup>52</sup> In Israel, 41.4% of children developed sleeping difficulties.<sup>53</sup> Similarly, in another Israeli  
13 study, 60% of mothers reported that their child's sleeping patterns had changed drastically and  
14 reported higher levels of anxiety traits associated with sleep changes.  
15  
16

### 17 *Sleep Problems*

18

19 Sleep disorders were reported in all studies among children. In Turkey, the prevalence of sleep  
20 disturbances among children was 55.5% and significantly associated with 6–8 years of age and  
21 poor family relationships. The most common sleep disturbances were bedtime resistance (51.9%)  
22 and sleep onset delay (61.4%).<sup>54</sup> Sleep disturbances were more common in children of parents  
23 who felt helpless, apprehensive, and frightened during the pandemic,<sup>54</sup> and children whose  
24 parents were divorced.<sup>52</sup> The direct effect of trauma scores on sleep problems, the direct effect  
25 of sleep problems on chronotype scores and on oppositional defiant disorder (ODD) symptom  
26 scores were significant.<sup>55</sup>  
27  
28  
29

### 30 *3.4.3. Healthcare workers*

31

32 A total of 47 studies assessed sleep health among healthcare workers in all Middle Eastern  
33 countries listed in the study characteristics, except Palestine, Cyprus, and Iraq. The sample size  
34 of studies ranged from 105 to 2,331 participants.  
35  
36

### 37 *Sleep Duration*

38

39 Sleep duration significantly decreased for HCWs in most countries, except Israel, where medical  
40 residents treating COVID-19 reported longer sleep duration.<sup>56</sup> In Egypt, both physicians on the  
41 front line and others were at risk of falling asleep, staying asleep, or sleeping excessively.<sup>57</sup>  
42 Furthermore, there was a statistically significant decrease in sleeping hours among HCWs with  
43 severe and extremely severe depression.<sup>58</sup> Those with higher levels of health anxiety related to  
44 COVID-19 were working more days weekly and had lower sleeping hours.<sup>59</sup> Female sex, age  $\leq 30$   
45 years, attending emergency and night shifts, watching/reading COVID-19 news  $\geq 2$  h/day, and not  
46 getting emotional support from family, society, and hospitals were associated with a high  
47 likelihood of inadequate sleeping HCW in Egypt.<sup>60</sup>  
48  
49  
50

### 51 *Sleep Quality*

52

53 Most studies reported poor and reduced SQ, as measured by the PSQI, with poor sleep quality  
54 prevalence ranging from 48.4%<sup>61</sup> to 96.1%<sup>62</sup>. Both, front line HCWs and non-front line HCW  
55  
56  
57  
58  
59  
60

1  
2  
3 reported poor SQ and/or had moderate-severe stress.<sup>63</sup> In Saudi Arabia poor SQ levels were  
4 highest among front line HCWs (emergency departments, intensive care units, and wards).<sup>64</sup> The  
5 most negatively scored components of SQ included sleep latency, duration, and efficacy. Poor  
6 SQ was more prevalent among females, nurses, hospital workers, frontline workers, individuals  
7 with <5 years of work experience, those with low social support, and individuals with increased  
8 traumatic stress levels.<sup>65</sup>  
9  
10

### 11 *Sleep Problems*

12  
13 HCWs between 31-40 years-old treating COVID-19 were at higher risk of severe insomnia,  
14 compared to those above 40 years-old.<sup>66</sup> In Turkey, insomnia incidence was 1.5 times higher for  
15 HCWs in the frontline and significantly higher amongst those working in the “area of final  
16 diagnosis”.<sup>67</sup> In a tertiary care hospital in Oman, the majority of HCWs (60.2%) aged  
17  $34.8 \pm 5.7$  years and with less working experience ( $11.9 \pm 5.9$  years) reported clinical insomnia  
18 during the pandemic.<sup>68</sup> Mean Insomnia Severity Index score in Turkey was significantly higher  
19 among HCWs working in COVID-19 clinics and intensive care units and among nurses.<sup>65</sup>  
20  
21  
22

### 23 3.4.4. *Students*

24  
25 A total of 21 studies with sample sizes ranging from 152 to 17,008 participants assessed sleep  
26 health among students.  
27

### 28 *Sleep Duration*

29  
30  
31 Among a large cohort of medical and science university students in Jordan, 44.2% of participants  
32 ( $n = 1019$ ) reported reduction in their sleeping hours.<sup>69</sup> Another study reported a statistical  
33 increase of total sleeping time from  $6.6 \pm 2.3$  h/day to  $8.3 \pm 2.7$  h/day.<sup>70</sup> In Israel, a significant  
34 reduction in sleep duration from lockdown to post-lockdown period for workdays and weekends  
35 was reported.<sup>71</sup>  
36  
37

### 38 *Sleep Quality*

39  
40 Furthermore, 85.55% of students reported poor SQ and 67.9% were females. It was found that  
41 sleep disturbance and daytime dysfunction were poorer in students with higher BMI ranges.<sup>72</sup> In  
42 Saudi Arabia, 25.9% of a sample of students reported poor SQ, 22.7% felt tired during the day,  
43 9.3% had nightmares and 5.2% had poor dreams.<sup>73</sup> Furthermore, extended quarantine negatively  
44 affected SQ of three-quarters of the undergraduate students in Jordan, with poor sleep quality  
45 reported in nearly half of the same sample.<sup>74</sup> Additionally, about a third of the same sample  
46 reported sleeping late and waking up more frequently.<sup>74</sup>  
47  
48

### 49 *Sleep Problems*

50  
51  
52 In Saudi Arabia, 22% of students had trouble falling asleep, 17.9% waking up during the night,  
53 and 8.8% waking up early in the morning.<sup>73</sup> Students reported a statistically high level of insomnia  
54 with a high level of depression, anxiety, and perceived stress. Undergraduate students reported  
55 statistically more insomnia symptoms with a lower level of psychological resilience.<sup>73</sup>  
56  
57  
58  
59  
60

1  
2  
3 Furthermore, lockdown in Turkey led to sleeping later, waking up frequently and failing to fall  
4 asleep.<sup>75</sup> In Saudi Arabia, medical students reported Narcolepsy (51.6%), insomnia (31.5%), and  
5 Circadian Rhythm Sleep Disorder (22.4%) as the most prevalent sleep disorders. Furthermore, a  
6 statistically significant increase of night sleep interruptions was reported during COVID-19. In  
7 Jordan, students experienced increased insomnia, shallow sleep, nightmares, or insufficient  
8 sleep, and these disorders were reported in significantly more females than males.<sup>76</sup>  
9  
10

### 11 3.4.5. *People with chronic illnesses*

12  
13 A total of 7 cross-sectional design studies assessed sleep health among the population with  
14 special conditions. The sample size of studies ranged from 145 to 2,223 participants. Those  
15 studies focused on a variety of chronic illnesses, including epilepsy (n=1), neurological conditions  
16 (n=1), cancer (n=1), musculoskeletal diseases (n=1), spine illnesses (n=1), rhematic disease (RD)  
17 (n=1), and multiple sclerosis (MS) (n=1).  
18  
19

#### 20 *Sleep Duration*

21  
22 In Saudi Arabia, 71.2% of patients with epilepsy experienced significant changes in their sleep.<sup>77</sup>  
23 <sup>78</sup> Almost half of them had been seizure-free in the three months prior to the pandemic.  
24 Furthermore, 9.6% of patients surveyed reported more sleep than usual, 2.6% reported less  
25 sleep, and 0.6% reported intermittent sleep.<sup>77, 78</sup>  
26  
27

#### 28 *Sleep Quality*

29  
30 Quality of sleep among different patient groups, as measured by PSQI, was affected during the  
31 pandemic. In Turkey, for patients with musculoskeletal pain, PSQI revealed a weak correlation  
32 with pain levels in all body parts.<sup>79</sup> Quality of sleep was found to be bad for 58.7% cancer  
33 patients.<sup>80</sup> Depression, anxiety, and defective SQ levels for pregnant women (mean age was  
34  $30.17 \pm 5.47$  years) who were previously in quarantine was significantly higher.<sup>81</sup> SQ among  
35 patients with MS patients was significantly impaired during the pandemic too.<sup>82</sup>  
36  
37  
38

#### 39 *Sleep Problems*

40  
41 Although patients reported different experiences, a certain degree of sleep disorders was reported  
42 among almost all patients. In Jordan, Athamneh et al., reported that 37.5% of patients with chronic  
43 headaches reported changes in sleeping patterns during the COVID-19 pandemic.<sup>83</sup> Finally, the  
44 frequency of sleep problems in patients with RD was significantly higher than that of non-patients,  
45 but significantly lower than that reported in hospital workers.<sup>84</sup>  
46  
47  
48  
49  
50  
51  
52  
53  
54  
55  
56  
57  
58  
59  
60

## Discussion

This systematic review of the literature explored the impact of the COVID-19 pandemic on sleep health among populations in the Middle East. To the best of our knowledge, this is the very first systematic review on sleep health among any Middle Eastern population, and one of the first reviews to pool evidence on sleep health during the ongoing COVID-19 pandemic. The findings of our systematic review suggest that across all sub-populations (e.g., adults, children, students, healthcare workers, and people with chronic illnesses), the COVID-19 pandemic had a drastic negative? Impact on sleep duration, sleep quality, and prevalence of sleep disorders.

Sleep duration was negatively impacted in all populations investigated, whereby the prevalence of short or long sleep seems to have increased. Similarly, sleep quality in all populations decreased drastically. Studies reported a consistent association between sociodemographic variables (e.g., being single,<sup>85-88</sup> low education levels,<sup>85, 87, 89-92</sup> unemployment during the pandemic,<sup>93</sup> female gender,<sup>40, 86</sup> low social support<sup>65, 94</sup>) and poorer sleep quality. Furthermore, with regards to sleep problems, insomnia was the most reported sleeping problem across studies. Higher prevalence of insomnia and other sleep disorders were observed among younger participants, those with a diagnosed mental disorder, unmarried participants, and undergraduate students.<sup>95</sup> Moreover, women reported higher rates of insomnia compared to men. Interestingly, there was an observed positive association between lockdown duration and the prevalence of insomnia. Finally, and among people with chronic illnesses, reversal of sleeping pattern (e.g., initiating sleep after sunrise) was the most frequent change in sleep habits.<sup>77</sup>

When comparing different sub-populations in this study, HCWs' sleep health was the most impaired during the pandemic compared with other sub-populations. While in other populations sleep duration was affected with no specific trend, healthcare workers demonstrated predominantly decreased sleep duration. Furthermore, and in addition to reduced sleep duration, front line HCWs reported the lowest SQ. Among HCWs, being on the front-line, being younger, and having less experience working were all associated with increased insomnia prevalence. Nurses experienced emotional exhaustion, and burnout levels increased in line with insomnia.<sup>96</sup> Long shifts, busy working conditions, and less sleep disturbed their sleeping patterns and made HCWs feel tired.

Our findings are consistent with prior research in other populations.<sup>6, 17, 97, 98</sup> For instance, Jahrami et al., reported an increased burden of sleep problem during the COVID-19 pandemic in early 2021, with approximately 40% of the general population reporting sleep problems.<sup>17</sup> Similarly, and consistent with our findings among Middle Eastern front-line workers, a meta-analysis conducted by Salari et al., showed that healthcare workers are more vulnerable to sleep disturbances during the pandemic.<sup>98</sup> This finding was associated with increased workplace stress and was shown in both nurses and physicians.<sup>98</sup>

The findings of this systematic review are important for public health policy and for directing intervention measures. Given that sleep is a risk factor for the leading causes of death including CVD, hypertension, diabetes, obesity, etc., interventions that promote sleep health are of high public health relevance, particularly in the current pandemic era. Such interventions can include

1  
2  
3 social and administrative support, workplace interventions,<sup>99</sup> providing education that emphasizes  
4 the importance of sleep behavior, encouraging promoting behaviors and relaxation strategies.  
5 The differences in impact and severity of sleep health problems among different sub-populations,  
6 as identified in this study, suggest that policies and interventions should be tailored to each  
7 population. Some authors have already suggested emergency management measures that  
8 should be taken to improve the quality of sleep in FLHCWs during a pandemic: strengthen  
9 exercise intervention, psychological counseling, drug intervention treatment strategies if  
10 necessary, and other.<sup>100</sup> Similarly, sleep problems in childhood are linked with impaired motor  
11 and cognitive skills, as well as with difficulties in academic activities, emotional regulation, quality  
12 of life, growth, body composition, and immune function.<sup>101</sup> A daily routine is a fundamental aspect  
13 of children's development of healthy behaviors and adequate energy levels. Interventions that  
14 focus on health promotion and advocating for healthy sleeping patterns among children,  
15 especially as it relates to other health behaviors development, should be implemented.  
16  
17  
18  
19

20 In addition to intervention efforts to address poor sleep among MENA populations, there is a  
21 strong need to understand barriers to adequate sleep among each sub-population. The current  
22 literature provides evidence regarding barriers to adequate sleep focuses primarily on western  
23 populations. This includes environmental factors (e.g., decreased green space),<sup>102, 103</sup> social  
24 factors (e.g., decreased social cohesion,<sup>104</sup> decreased safety),<sup>105-107</sup> and ambient factors (e.g.,  
25 increased air pollution,<sup>108-112</sup> increased noise).<sup>113</sup> However, there continues to be a lack of data on  
26 this topic in the MENA region despite high prevalence of poverty, gender inequality, political  
27 turmoil, violence, and other factors that are strongly linked with PTSD and other psychological  
28 factors, which are known to affect sleep.<sup>114, 115</sup> The unique social, structural, and environmental  
29 context of the MENA region, in addition to the demonstrated exacerbation of poor sleep health by  
30 the pandemic, highlights why increased efforts to understand and address sleep health,  
31 particularly post-pandemic, is relevant for MENA populations.  
32  
33

### 34 **Strengths, limitations, and future research**

35

36 This review is the first systematic review of the literature regarding the effects of COVID-19  
37 pandemic on the sleep health of Middle Eastern populations. Additionally, this paper provides a  
38 robust qualitative synthesis of data to include a wide scope of research on the topic published to  
39 date. This review covers a wide range of outcomes (e.g., any study that reported a sleep health  
40 related domain), includes only peer-reviewed articles as the source of information of high quality,  
41 and incorporates a wider scope of studies and populations. Despite those strengths, this study is  
42 not without noteworthy limitations that must be considered when interpreting our results. Firstly,  
43 most included studies are cross-sectional in design, which poses an intrinsic limitation given the  
44 design. For instance, it is not possible to establish causation with such studies. Additionally, most  
45 of the studies utilize self-reported surveys. Given the rapidly evolving situation with the pandemic  
46 (e.g., lockdown measures, changes in epidemiology of COVID-19, etc.), this approach seemed  
47 the most suitable to collect data rapidly. However, this introduces several limitations including  
48 self-selection bias, recall bias, and social desirability bias.<sup>116-118</sup> Another limitation specific to the  
49 design of this review is that it excludes studies conducted in languages other than English.  
50  
51  
52  
53

54 Furthermore, studies included in this review utilized different methods for assessing sleep health,  
55 which varied across populations. Mainly, this included subjective measures, including a variety of  
56  
57  
58  
59



1  
2  
3 tools to measure sleep health (e.g., Pittsburgh Sleep Quality Index, Insomnia Severity Index). In  
4 turn, this makes it challenging to compare results between different studies and different  
5 populations. Additionally, it is important to note that no study included in this review utilized  
6 objective tools to measure sleep health (e.g., actigraphy), and many studies utilized tools that do  
7 not have demonstrated validity or reliability in the context of sleep health measurement (e.g.,  
8 surveys developed by authors of the study). Consequently, future research should focus on  
9 utilizing objective tools to measure sleep health. If not feasible, subjective tools with demonstrated  
10 reliability and validity are preferred. Finally, future research should continue to understand the  
11 long-term impacts of the abrupt change in lifestyle brought about by the COVID-19 pandemic on  
12 Middle Eastern populations.  
13  
14  
15  
16  
17  
18  
19  
20  
21  
22  
23  
24  
25  
26  
27  
28  
29  
30  
31  
32  
33  
34  
35  
36  
37  
38  
39  
40  
41  
42  
43  
44  
45  
46  
47  
48  
49  
50  
51  
52  
53  
54  
55  
56  
57  
58  
59  
60

## Conclusions

This review sought to capture the currently available evidence in the literature on the impact of the COVID-19 pandemic on the sleep health of Middle Eastern populations. Given high burden of poor sleep that has been exacerbated by the COVID pandemic, there is a strong need for tailored interventions to improve sleep health. Finally, and considering that Middle Eastern populations continue to be severely understudied in public health, future research should continue to investigate and explore the impact of the COVID-19 pandemic on public health in The Middle East, including longitudinal studies utilizing objective measures to assess the impact of sleep on the health of MENA populations across their lives.

For peer review only

## Declarations

### *Ethics approval and consent to participate*

Not Applicable

### *Consent for publication*

Not Applicable

### *Availability of data and materials*

All data generated or analyzed during this study are included in this published article and its supplementary information files

### *Competing interests*

The authors declare that they have no competing interests

### *Funding*

No funding to declare

### *Authors' contributions*

All authors contributed to revise work for important intellectual content, gave the final approval of the version to be published, and agreed on all aspects of the work, especially concerning its accuracy and integrity. Further specific activities have been distributed as follows: Y.A.A conceived the hypothesis. Y.A.A and O.T designed the studies. Y.A.A, O.T. and R.M performed the article screening and data extraction. Y.A.A, O.T and G.S performed the quality assessment. All authors (Y.A.A., O.T., G.S., R.M., N.M., D.T.,) had access to data and verified it, and contributed feedback to drafts of the manuscript. Y.A.A and O.T shaped the manuscript with input from the entire team.

### *Acknowledgements*

We would like to thank the authors of the respective studies included in this review, as well as the participants of those studies.

## References

1. Wang C, Pan R, Wan X, Tan Y, Xu L, Ho CS, et al. Immediate psychological responses and associated factors during the initial stage of the 2019 coronavirus disease (COVID-19) epidemic among the general population in China. *International journal of environmental research and public health*. 2020;17(5):1729.
2. Dossett ML, Fricchione GL, Benson H. A new era for mind–body medicine. *The New England journal of medicine*. 2020;382(15):1390.
3. Jahrami HA, Alhaj OA, Humood AM, Alenezi AF, Fekih-Romdhane F, AlRasheed MM, et al. Sleep disturbances during the COVID-19 pandemic: A systematic review, meta-analysis, and meta-regression. *Sleep Med Rev*. 2022;62:101591.
4. Yuksel D, McKee GB, Perrin PB, Alzueta E, Caffarra S, Ramos-Usuga D, et al. Sleeping when the world locks down: correlates of sleep health during the COVID-19 pandemic across 59 countries. *Sleep Health*. 2021;7(2):134-42.
5. Hisler GC, Twenge JM. Sleep characteristics of US adults before and during the COVID-19 pandemic. *Social Science & Medicine*. 2021;276:113849.
6. Alimoradi Z, Broström A, Tsang HWH, Griffiths MD, Haghayegh S, Ohayon MM, et al. Sleep problems during COVID-19 pandemic and its' association to psychological distress: A systematic review and meta-analysis. *EClinicalMedicine*. 2021;36:100916.
7. Lin YN, Liu ZR, Li SQ, Li CX, Zhang L, Li N, et al. Burden of sleep disturbance during COVID-19 pandemic: a systematic review. *Nature and Science of Sleep*. 2021;13:933.
8. Kocevskaja D, Blanken TF, Van Someren EJ, Rösler L. Sleep quality during the COVID-19 pandemic: not one size fits all. *Sleep medicine*. 2020;76:86-8.
9. Pinto J, van Zeller M, Amorim P, Pimentel A, Dantas P, Eusébio E, et al. Sleep quality in times of Covid-19 pandemic. *Sleep medicine*. 2020;74:81-5.
10. Gupta R, Grover S, Basu A, Krishnan V, Tripathi A, Subramanyam A, et al. Changes in sleep pattern and sleep quality during COVID-19 lockdown. *Indian journal of psychiatry*. 2020;62(4):370.
11. Kumari A, Ranjan P, Vikram NK, Kaur D, Sahu A, Dwivedi SN, et al. A short questionnaire to assess changes in lifestyle-related behaviour during COVID 19 pandemic. *Diabetes & Metabolic Syndrome: Clinical Research & Reviews*. 2020;14(6):1697-701.
12. Benham G. Stress and sleep in college students prior to and during the COVID-19 pandemic. *Stress and Health*. 2021;37(3):504-15.
13. Alimoradi Z, Broström A, Tsang HW, Griffiths MD, Haghayegh S, Ohayon MM, et al. Sleep problems during COVID-19 pandemic and its' association to psychological distress: A systematic review and meta-analysis. *EClinicalMedicine*. 2021;36:100916.
14. Peretti-Watel P, Alleaume C, Léger D, Beck F, Verger P, Group C. Anxiety, depression and sleep problems: a second wave of COVID-19. *General Psychiatry*. 2020;33(5).
15. Martínez-de-Quel Ó, Suárez-Iglesias D, López-Flores M, Pérez CA. Physical activity, dietary habits and sleep quality before and during COVID-19 lockdown: A longitudinal study. *Appetite*. 2021;158:105019.
16. Marelli S, Castelnuovo A, Somma A, Castronovo V, Mombelli S, Bottoni D, et al. Impact of COVID-19 lockdown on sleep quality in university students and administration staff. *Journal of neurology*. 2021;268(1):8-15.
17. Jahrami H, BaHammam AS, Bragazzi NL, Saif Z, Faris M, Vitiello MV. Sleep problems during the COVID-19 pandemic by population: a systematic review and meta-analysis. *J Clin Sleep Med*. 2021;17(2):299-313.
18. Moreira DN, da Costa MP. The impact of the Covid-19 pandemic in the precipitation of intimate partner violence. *International journal of law and psychiatry*. 2020;71:101606.

19. Agüero JM. COVID-19 and the rise of intimate partner violence. *World development*. 2021;137:105217.
20. Gosangi B, Park H, Thomas R, Gujrathi R, Bay CP, Raja AS, et al. Exacerbation of physical intimate partner violence during COVID-19 lockdown. *Radiology*. 2020.
21. Rauer AJ, El-Sheikh M. Reciprocal pathways between intimate partner violence and sleep in men and women. *Journal of Family Psychology*. 2012;26(3):470.
22. Sanchez SE, Islam S, Zhong Q-Y, Gelaye B, Williams MA. Intimate partner violence is associated with stress-related sleep disturbance and poor sleep quality during early pregnancy. *PloS one*. 2016;11(3):e0152199.
23. Mokdad AH, Jaber S, Aziz MIA, AlBuhairan F, AlGhaithi A, AlHamad NM, et al. The state of health in the Arab world, 1990–2010: an analysis of the burden of diseases, injuries, and risk factors. *The Lancet*. 2014;383(9914):309-20.
24. Guetat I. The effects of corruption on growth performance of the MENA countries. *Journal of Economics and Finance*. 2006;30(2):208-21.
25. Organization WH. *Country health information systems: a review of the current situation and trends*. Geneva: WHO. 2011.
26. Organization WH. *Health systems priorities in the Eastern Mediterranean Region: challenges and strategic directions*. 2004.
27. Jarasvaraparn C, Zlomke K, Vann NC, Wang B, Crissinger KD, Gremse DA. The relationship between sleep disturbance, quality of life and psychosocial functioning in pediatric patients with inflammatory bowel disease. *Annals of gastroenterology and digestive disorders*. 2018;1(1):9.
28. Gómez-Olivé FX, Rohr JK, Roden LC, Rae DE, von Schantz M. Associations between sleep parameters, non-communicable diseases, HIV status and medications in older, rural South Africans. *Scientific reports*. 2018;8(1):1-11.
29. Basnet S, Merikanto I, Lahti T, Männistö S, Laatikainen T, Vartiainen E, et al. Associations of common chronic non-communicable diseases and medical conditions with sleep-related problems in a population-based health examination study. *Sleep Science*. 2016;9(3):249-54.
30. Nowowiejska J, Baran A, Flisiak I. Mutual relationship between sleep disorders, quality of life and psychosocial aspects in patients with psoriasis. *Frontiers in Psychiatry*. 2021:1086.
31. Lies J, Mellor A, Jobson L, Drummond SP. Prevalence of sleep disturbance and its relationships with mental health and psychosocial issues in refugees and asylum seekers attending psychological services in Australia. *Sleep Health*. 2019;5(4):335-43.
32. Itani O, Jike M, Watanabe N, Kaneita Y. Short sleep duration and health outcomes: a systematic review, meta-analysis, and meta-regression. *Sleep medicine*. 2017;32:246-56.
33. Jike M, Itani O, Watanabe N, Buysse DJ, Kaneita Y. Long sleep duration and health outcomes: a systematic review, meta-analysis and meta-regression. *Sleep medicine reviews*. 2018;39:25-36.
34. Moher D, Liberati A, Tetzlaff J, Altman DG, Group\* P. Preferred reporting items for systematic reviews and meta-analyses: the PRISMA statement. *Annals of internal medicine*. 2009;151(4):264-9.
35. Abouzid M, El-Sherif DM, Eltewacy NK, Dahman NBH, Okasha SA, Ghozy S, et al. Influence of COVID-19 on lifestyle behaviors in the Middle East and North Africa Region: a survey of 5896 individuals. *J Transl Med*. 2021;19(1):129.
36. Arafa A, Mohamed A, Saleh L, Senosy S. Psychological Impacts of the COVID-19 Pandemic on the Public in Egypt. *Community mental health journal*. 2021;57(1):64-9.
37. Alomari MA, Alzoubi KH, Khabour OF, Darabseh MZ. Sleeping habits during COVID-19 induced confinement: A study from Jordan. *Heliyon*. 2021;7(12).

- 1
- 2
- 3 38. Alshumrani R, Qanash S, Aldobyany A, Alhejaili F, AlQassas I, Shabrawishi M, et al. Sleep quality and mental health in coronavirus disease 2019 patients and general population during the pandemic. *Annals of Thoracic Medicine*. 2022;17(1):21-7.
- 4
- 5
- 6 39. Romdhani M, Rae DE, Nédélec M, Ammar A, Chtourou H, Al Horani R, et al. COVID-19 Lockdowns: A Worldwide Survey of Circadian Rhythms and Sleep Quality in 3911 Athletes from 7 49 Countries, with Data-Driven Recommendations. *Sports Med*. 2021:1-16.
- 8
- 9 40. AlRasheed MM, Alkadir AM, Bin Shuqiran KI, Al-Aqeel S, Jahrami HA, BaHammam AS. The Impact of Quarantine on Sleep Quality and Psychological Distress During the COVID-19 10 Pandemic. *Nature and Science of Sleep*. 2021;13:1037-48.
- 11
- 12 41. Torkian S, Akhlaghi E, Khosravi V, Etesami R, Ahmadi A, Khanjani N, et al. Depression 13 symptoms and sleep quality during COVID-19 outbreak in Iran: A national cross-sectional study. *Iranian Journal of Psychiatry and Behavioral Sciences*. 2021;15(1).
- 14
- 15 42. Al Gharaibeh F, Gibson L. The impact of COVID-19 quarantine measures on the mental 16 health of families. *Journal of Social Work*.
- 17
- 18 43. Alghamdi AN, Alotaibi MI, Alqahtani AS, Al Aboud D, Abdel-Moneim AS. BNT162b2 and 19 ChAdOx1 SARS-CoV-2 Post-vaccination Side-Effects Among Saudi Vaccinees. *Frontiers in 20 Medicine*. 2021;8.
- 21 44. Cheikh Ismail L, Osaili TM, Mohamad MN, Al Marzouqi A, Jarrar AH, Abu Jamous DO, 22 et al. Eating Habits and Lifestyle during COVID-19 Lockdown in the United Arab Emirates: A 23 Cross-Sectional Study. *Nutrients*. 2020;12(11).
- 24 45. Akbarpour S, Nakhostin-Ansari A, Haghighi KS, Etesam F, Alemohammad ZB, Aghajani 25 F, et al. COVID-19 Fear Association with Depression, Anxiety, and Insomnia: A National Web- 26 Based Survey on the General Population. *Iranian Journal of Psychiatry*. 2022;17(1):24-34.
- 27 46. Keskin DD, Keskin S, Bostan S. Mental disorders among pregnant women during the 28 COVID-19 pandemic. A cross-sectional study. *Sao Paulo Medical Journal*. 2022;140(1):87-93.
- 29 47. Almugti HS, Alotaibi A, Almohammed A, Abuhadi R, Baeshen R, Alharthi Z, et al. Impact 30 of COVID-19 on Saudi Children: Special Focus on Behavioral, Social, and Emotional Aspects, 31 2020-2021. *Cureus*. 2021;13(11):e19856.
- 32 48. Al-Rahamneh H, Arafa L, Al Orani A, Baqleh R. Long-term psychological effects of 33 covid-19 pandemic on children in Jordan. *International Journal of Environmental Research and 34 Public Health*. 2021;18(15).
- 35 49. Mekkawy LH. Psychological, Nutritional and Behavioral Impact of COVID-19 Lockdown: 36 A Cross Sectional Study on Egyptian Children. *Psychiatry Investigation*. 2022;19(2):110-6.
- 37 50. Ranjbar K, Hosseinpour H, Shahriarirad R, Ghaem H, Jafari K, Rahimi T, et al. Students' 38 attitude and sleep pattern during school closure following COVID-19 pandemic quarantine: a 39 web-based survey in south of Iran. *Environmental Health and Preventive Medicine*. 2021;26(1).
- 40 51. Zengin M, Yayan EH, Vicnelioğlu E. The effects of the COVID-19 pandemic on children's 41 lifestyles and anxiety levels. *J Child Adolesc Psychiatr Nurs*. 2021;34(3):236-42.
- 42 52. Almhizai RA, Almogren SH, Altwijery NA, Alanazi BA, Al Dera NM, Alzahrani SS, et al. 43 Impact of COVID-19 on Children's and Adolescent's Mental Health in Saudi Arabia. *Cureus*. 44 2021;13(11):e19786.
- 45 53. Ghanamah R, Eghbaria-Ghanamah H. Impact of covid-19 pandemic on behavioral and 46 emotional aspects and daily routines of Arab israeli children. *International Journal of 47 Environmental Research and Public Health*. 2021;18(6):1-19.
- 48 54. Ustuner Top F, Cam HH. Sleep disturbances in school-aged children 6-12 years during 49 the COVID-19 pandemic in Turkey. *J Pediatr Nurs*. 2022;63:125-30.
- 50 55. Çetin FH, Uçar HN, Türkoğlu S, Kahraman EM, Kuz M, Güleç A. Chronotypes and 51 trauma reactions in children with ADHD in home confinement of COVID-19: full mediation effect 52 of sleep problems. *Chronobiol Int*. 2020;37(8):1214-22.
- 53
- 54
- 55
- 56
- 57
- 58
- 59
- 60

- 1  
2  
3 56. Dolev T, Zubedat S, Brand Z, Bloch B, Mader E, Blondheim O, et al. Physiological  
4 parameters of mental health predict the emergence of post-traumatic stress symptoms in  
5 physicians treating COVID-19 patients. *Transl Psychiatry*. 2021;11(1):169.
- 6 57. Elghazally NM, Abdeldaim D. Depression among medical staff during the coronavirus  
7 disease-19 pandemic in Egypt: A comparative web-based cross-sectional study. *Open Access*  
8 *Macedonian Journal of Medical Sciences*. 2021;9:1578-85.
- 9 58. Elgohary HM, Sehlo MG, Bassiony MM, Youssef UM, Elrafey DS, Amin SI. Depression  
10 among health workers caring for patients with COVID-19 in Egypt. *Egyptian Journal of*  
11 *Neurology, Psychiatry and Neurosurgery*. 2021;57(1).
- 12 59. Abdelghani M, Alsadik M, Abdelmoaty A, Atwa S, Said A, Hassan M. Sleep disturbances  
13 following recovery from COVID-19: a comparative cross-sectional study in Egypt. *Eastern*  
14 *Mediterranean Health Journal*. 2022;28(1):14-22.
- 15 60. Arafa A, Mohammed Z, Mahmoud O, Elshazley M, Ewis A. Depressed, anxious, and  
16 stressed: What have healthcare workers on the frontlines in Egypt and Saudi Arabia  
17 experienced during the COVID-19 pandemic? *Journal of Affective Disorders*. 2021;278:365-71.
- 18 61. Zarzour M, Hachem C, Kerbage H, Richa S, Choueifaty DE, Saliba G, et al. Anxiety and  
19 sleep quality in a sample of Lebanese healthcare workers during the COVID-19 outbreak.  
20 *Encephale*. 2021.
- 21 62. Duru H. The Continuing Effect of COVID-19 Pandemic on Physical Well-Being and  
22 Mental Health of ICU Healthcare Workers in Turkey: A Single-Centre Cross-Sectional Later-  
23 Phase Study. *Journal of Intensive Care Medicine*. 2021.
- 24 63. Jahrami H, BaHammam AS, AlGahtani H, Ebrahim A, Faris M, AlEid K, et al. The  
25 examination of sleep quality for frontline healthcare workers during the outbreak of COVID-19.  
26 *Sleep and Breathing*. 2021;25(1):503-11.
- 27 64. Meo SA, Alkhalifah JM, Alshammari NF, Alnufaie WS. Comparison of Generalized  
28 Anxiety and Sleep Disturbance among Frontline and Second-Line Healthcare Workers during  
29 the COVID-19 Pandemic. *Int J Environ Res Public Health*. 2021;18(11).
- 30 65. Yilmaz M, Kirac Y, Sahin MK. Sleep quality and related factors in a sample of Turkish  
31 healthcare workers during the COVID-19 pandemic: A cross-sectional study. *International*  
32 *Journal of Clinical Practice*. 2021;75(11).
- 33 66. Elkholy H, Tawfik F, Ibrahim I, Salah El-Din W, Sabry M, Mohammed S, et al. Mental  
34 health of frontline healthcare workers exposed to COVID-19 in Egypt: A call for action. *The*  
35 *International journal of social psychiatry*. 2021;67(5):522-31.
- 36 67. Bulut D, Sefa Sayar M, Koparal B, Cem Bulut E, Çelik S. Which of us were more  
37 affected by the pandemic? The psychiatric impacts of the COVID-19 pandemic on healthcare  
38 professionals in the province where the first quarantine units were established in Turkey.  
39 *International Journal of Clinical Practice*. 2021;75(7).
- 40 68. Chan MF, Al-Shekaili M, Al-Adawi S, Hassan W, Al-Said N, Al-Sulaimani F, et al. Mental  
41 health outcomes among health-care workers in Oman during COVID-19: A cluster analysis. *Int J*  
42 *Nurs Pract*. 2021;27(6):e12998.
- 43 69. Elsalem L, Al-Azzam N, Jum'ah AA, Obeidat N, Sindiani AM, Kheirallah KA. Stress and  
44 behavioral changes with remote E-exams during the Covid-19 pandemic: A cross-sectional  
45 study among undergraduates of medical sciences. *Annals of medicine and surgery (2012)*.  
46 2020;60:271-9.
- 47 70. Jalal SM, Beth MRM, Al-Hassan HJM, Alshealah NMJ. Body mass index, practice of  
48 physical activity and lifestyle of students during covid-19 lockdown. *Journal of Multidisciplinary*  
49 *Healthcare*. 2021;14:1901-10.
- 50 71. Lan AN, Kotler D, Kronfeld-Schor N, Stukalin Y, Einat H. Changes in sleep patterns of  
51 college students in Israel during COVID-19 lockdown, a sleep diaries study. *Sleep and*  
52 *Biological Rhythms*.
- 53  
54  
55  
56  
57  
58  
59

- 1  
2  
3 72. Meo SA, Alkhalifah JM, Alshammari NF, Alnufaie WS, Algoblan AF. Impact of COVID-19  
4 pandemic on sleep quality among medical and general science students: King Saud University  
5 Experience. *Pakistan Journal of Medical Sciences*. 2022;38(3):639-44.
- 6 73. Alyoubi A, Halstead EJ, Zambelli Z, Dimitriou D. The impact of the covid-19 pandemic on  
7 students' mental health and sleep in Saudi Arabia. *International Journal of Environmental  
8 Research and Public Health*. 2021;18(17).
- 9 74. Saadeh H, Saadeh M, Almobaideen W, Al Refaei A, Shewaikani N, Al Fayez RQ, et al.  
10 Effect of COVID-19 Quarantine on the Sleep Quality and the Depressive Symptom Levels of  
11 University Students in Jordan During the Spring of 2020. *Frontiers in Psychiatry*. 2021;12.
- 12 75. Torun F, Torun SD. The psychological impact of the COVID-19 pandemic on medical  
13 students in Turkey. *Pakistan Journal of Medical Sciences*. 2020;36(6):1355-9.
- 14 76. Kheirallah K, Bloukh S, Khasawneh W, Alsulaiman J, Khassawneh A, Al-Mistarehi A-H,  
15 et al. Medical students' relative immunity, or lack thereof, against COVID-19 emotional distress  
16 and psychological challenges; a descriptive study from Jordan. *F1000Research*. 2021;10:297.
- 17 77. Alkhotani A, Siddiqui MI, Almunashri F, Baothman R. The effect of COVID-19 pandemic  
18 on seizure control and self-reported stress on patient with epilepsy. *Epilepsy and Behavior*.  
19 2020;112.
- 20 78. Alhurishi SA, Almutairi KM, Vinluan JM, Aboshaiqah AE, Marie MA. Mental Health  
21 Outcomes of Healthcare Providers During COVID-19 Pandemic in Saudi Arabia: A Cross-  
22 Sectional Study. *Front Public Health*. 2021;9:625523.
- 23 79. Karatel M, Bulut ZI, Sari EO, Pelin Z, Yakut Y. The profile of musculoskeletal pain and its  
24 associations with sleep quality and depression during the COVID-19 in Turkey. *Korean Journal  
25 of Pain*. 2022;35(1):78-85.
- 26 80. Güç ZG, Alacacioğlu A, Yazır MG, Kalender ME, Ünal S, Oflazoğlu U, et al. Being a  
27 Cancer Patient during the Time of COVID-19: Impact of the Pandemic on the Anxiety and the  
28 Sleeping Quality of Oncology Patients. *Chemotherapy*. 2022;67(1):29-36.
- 29 81. Çolak S, Gürlek B, Önal Ö, Yılmaz B, Hocaoglu C. The level of depression, anxiety, and  
30 sleep quality in pregnancy during coronavirus disease 2019 pandemic. *J Obstet Gynaecol Res*.  
31 2021;47(8):2666-76.
- 32 82. Yeni K, Tulek Z, Terzi M. A year with the fear of COVID-19 in multiple sclerosis patients:  
33 Examination of depression, sleep quality and quality of life before and after the pandemic. *Mult  
34 Scler Relat Disord*. 2022;57:103370.
- 35 83. Athamneh M, Sa'Di Q, Aldabbour B, Khader Y, Batayha W. Knowledge, attitudes, and  
36 impact of COVID-19 pandemic among neurology patients in Jordan: A cross-sectional study.  
37 *Journal of the Neurological Sciences*. 2021;429.
- 38 84. Seyahi E, Poyraz BC, Sut N, Akdogan S, Hamuryudan V. The psychological state and  
39 changes in the routine of the patients with rheumatic diseases during the coronavirus disease  
40 (COVID-19) outbreak in Turkey: a web-based cross-sectional survey. *Rheumatology  
41 International*. 2020;40(8):1229-38.
- 42 85. Younes S, Safwan J, Rahal M, Hammoudi D, Akiki Z, Akel M. Effect of COVID-19 on  
43 mental health among the young population in Lebanon. *Encephale*. 2021.
- 44 86. Alharbi AS, Alshahrani SM, Alsaadi MM, Al-Jahdali HH, Wali SO, BaHammam AS.  
45 Sleep quality and insomnia during the COVID-19 lockdown among the Saudi public A cross-  
46 sectional study. *Saudi Medical Journal*. 2021;42(4):384-90.
- 47 87. Duran S, Erkin Ö. Psychologic distress and sleep quality among adults in Turkey during  
48 the COVID-19 pandemic. *Progress in Neuro-Psychopharmacology and Biological Psychiatry*.  
49 2021;107.
- 50 88. Hammouri H, Almomani F, Abdel Muhsen R, Abughazzi A, Daghmash R, Abudayah A,  
51 et al. Lifestyle Variations during and after the COVID-19 Pandemic: A Cross-Sectional Study of  
52 Diet, Physical Activities, and Weight Gain among the Jordanian Adult Population. *International  
53 journal of environmental research and public health*. 2022;19(3).
- 54  
55  
56  
57  
58  
59  
60



- 1  
2  
3 89. Alqahtani SS, Banji D, Banji OJF. A survey assessing sleep efficiency among Saudis during COVID-19 home confinement using the Pittsburgh sleep quality index: A call for health education. *Saudi Pharmaceutical Journal*. 2021;29(7):692-8.
- 4  
5  
6 90. Cigiloglu A, Ozturk ZA, Efendioğlu EM. How do older adults react to coronavirus disease 2019? *European Geriatric Medicine*. 2020;11(SUPPL 1):S101.
- 7  
8 91. Aslan S, Dinç M. Examining the relationship between nurses' fear levels and insomnia during the COVID-19 pandemic in Turkey. *Perspect Psychiatr Care*. 2022;58(1):54-60.
- 9  
10 92. Cakmak HSG. Early phase of COVID-19 quarantine impacted insomnia symptoms in Turkish families. *Sleep science (Sao Paulo, Brazil)*. 2022;15(Spec 1):195-202.
- 11  
12 93. Al-Mutawa N, Al-Mutairi N. Impact of COVID-19 Pandemic and Lockdown Measures on the Mental Health of the General Population in the Gulf Cooperation Council States: A Cross-Sectional Study. *Frontiers in Psychiatry*. 2021;12.
- 13  
14 94. Mousavi M, Ahmadi N, Seyedhosseini Ghaheh H, Vaezi A, Javanmard SH. Psychological impact of COVID-19 on health-care workers: A multicenter cross-sectional study. *J Res Med Sci*. 2021;26:77.
- 15  
16 95. Barbato M, Thomas J. In this together: Psychological wellbeing of foreign workers in the United Arab Emirates during the COVID-19 pandemic. *Int J Psychol*. 2021;56(6):825-33.
- 17  
18 96. Aydin Sayilan A, Kulakaç N, Uzun S. Burnout levels and sleep quality of COVID-19 heroes. *Perspect Psychiatr Care*. 2021;57(3):1231-6.
- 19  
20 97. Alimoradi Z, Gozal D, Tsang HWH, Lin CY, Broström A, Ohayon MM, et al. Gender-specific estimates of sleep problems during the COVID-19 pandemic: Systematic review and meta-analysis. *J Sleep Res*. 2022;31(1):e13432.
- 21  
22 98. Salari N, Khazaie H, Hosseini-Far A, Ghasemi H, Mohammadi M, Shohaimi S, et al. The prevalence of sleep disturbances among physicians and nurses facing the COVID-19 patients: a systematic review and meta-analysis. *Global Health*. 2020;16(1):92.
- 23  
24 99. Redeker NS, Caruso CC, Hashmi SD, Mullington JM, Grandner M, Morgenthaler TI. Workplace interventions to promote sleep health and an alert, healthy workforce. *Journal of Clinical Sleep Medicine*. 2019;15(4):649-57.
- 25  
26 100. Souza LFFd, Paineiras-Domingos LL, Melo-Oliveira MEdS, Pessanha-Freitas J, Moreira-Marconi E, Lacerda ACR, et al. The impact of COVID-19 pandemic in the quality of sleep by Pittsburgh Sleep Quality Index: A systematic review. *Ciência & Saúde Coletiva*. 2021;26:1457-66.
- 27  
28 101. Camacho-Montaño LR, Iranzo A, Martínez-Piédrola RM, Camacho-Montaño LM, Huertas-Hoyas E, Serrada-Tejeda S, et al. Effects of COVID-19 home confinement on sleep in children: A systematic review. *Sleep medicine reviews*. 2022:101596.
- 29  
30 102. Astell-Burt T, Feng X, Kolt GS. Does access to neighbourhood green space promote a healthy duration of sleep? Novel findings from a cross-sectional study of 259 319 Australians. *BMJ open*. 2013;3(8):e003094.
- 31  
32 103. Johnson BS, Malecki KM, Peppard PE, Beyer KM. Exposure to neighborhood green space and sleep: evidence from the Survey of the Health of Wisconsin. *Sleep Health*. 2018;4(5):413-9.
- 33  
34 104. DeSantis AS, Diez Roux AV, Moore K, Baron KG, Mujahid MS, Nieto FJ. Associations of neighborhood characteristics with sleep timing and quality: the Multi-Ethnic Study of Atherosclerosis. *Sleep*. 2013;36(10):1543-51.
- 35  
36 105. Johnson DA, Lisabeth L, Hickson D, Johnson-Lawrence V, Samdarshi T, Taylor H, et al. The social patterning of sleep in African Americans: associations of socioeconomic position and neighborhood characteristics with sleep in the Jackson Heart Study. *Sleep*. 2016;39(9):1749-59.
- 37  
38 106. Troxel WM, DeSantis A, Richardson AS, Beckman R, Ghosh-Dastidar B, Nugroho A, et al. Neighborhood disadvantage is associated with actigraphy-assessed sleep continuity and short sleep duration. *Sleep*. 2018;41(10):zsy140.
- 39  
40  
41  
42  
43  
44  
45  
46  
47  
48  
49  
50  
51  
52  
53  
54  
55  
56  
57  
58  
59  
60

- 1  
2  
3 107. Hill TD, Trinh HN, Wen M, Hale L. Perceived neighborhood safety and sleep quality: a  
4 global analysis of six countries. *Sleep medicine*. 2016;18:56-60.
- 5 108. Billings ME, Gold D, Szpiro A, Aaron CP, Jorgensen N, Gasset A, et al. The association  
6 of ambient air pollution with sleep apnea: the multi-ethnic study of atherosclerosis. *Annals of the*  
7 *American Thoracic Society*. 2019;16(3):363-70.
- 8 109. Shen Y-L, Liu W-T, Lee K-Y, Chuang H-C, Chen H-W, Chuang K-J. Association of PM2.  
9 5 with sleep-disordered breathing from a population-based study in Northern Taiwan urban  
10 areas. *Environmental Pollution*. 2018;233:109-13.
- 11 110. Lappharat S, Taneepanichskul N, Reutrakul S, Chirakalwasan N. Effects of bedroom  
12 environmental conditions on the severity of obstructive sleep apnea. *Journal of Clinical Sleep*  
13 *Medicine*. 2018;14(4):565-73.
- 14 111. Gislason T, Bertelsen RJ, Real FG, Sigsgaard T, Franklin KA, Lindberg E, et al. Self-  
15 reported exposure to traffic pollution in relation to daytime sleepiness and habitual snoring: a  
16 questionnaire study in seven North-European cities. *Sleep Medicine*. 2016;24:93-9.
- 17 112. Castañeda JL, Kheirandish-Goza L, Goza D, Accinelli RA, Group PCIdIdIAR. Effect of  
18 reductions in biomass fuel exposure on symptoms of sleep apnea in children living in the  
19 peruvian andes: a preliminary field study. *Pediatric pulmonology*. 2013;48(10):996-9.
- 20 113. Halperin D. Environmental noise and sleep disturbances: A threat to health? *Sleep*  
21 *science*. 2014;7(4):209-12.
- 22 114. Germain A. Sleep disturbances as the hallmark of PTSD: where are we now? *American*  
23 *Journal of Psychiatry*. 2013;170(4):372-82.
- 24 115. Galovski TE, Monson C, Bruce SE, Resick PA. Does cognitive-behavioral therapy for  
25 PTSD improve perceived health and sleep impairment? *Journal of Traumatic Stress: Official*  
26 *Publication of The International Society for Traumatic Stress Studies*. 2009;22(3):197-204.
- 27 116. Bergen N, Labonté R. "Everything is perfect, and we have no problems": detecting and  
28 limiting social desirability bias in qualitative research. *Qualitative health research*.  
29 2020;30(5):783-92.
- 30 117. Larson RB. Controlling social desirability bias. *International Journal of Market Research*.  
31 2019;61(5):534-47.
- 32 118. Sedgwick P. What is recall bias? *BMJ*. 2012;344.
- 33  
34  
35  
36  
37  
38  
39  
40  
41  
42  
43  
44  
45  
46  
47  
48  
49  
50  
51  
52  
53  
54  
55  
56  
57  
58  
59  
60

**Fig. 1.** Preferred Reporting Items for Systematic Reviews and Meta-Analyses (PRISMA) study selection flow diagram outlining the literature review process when searching for articles on PubMed and Web of Science.

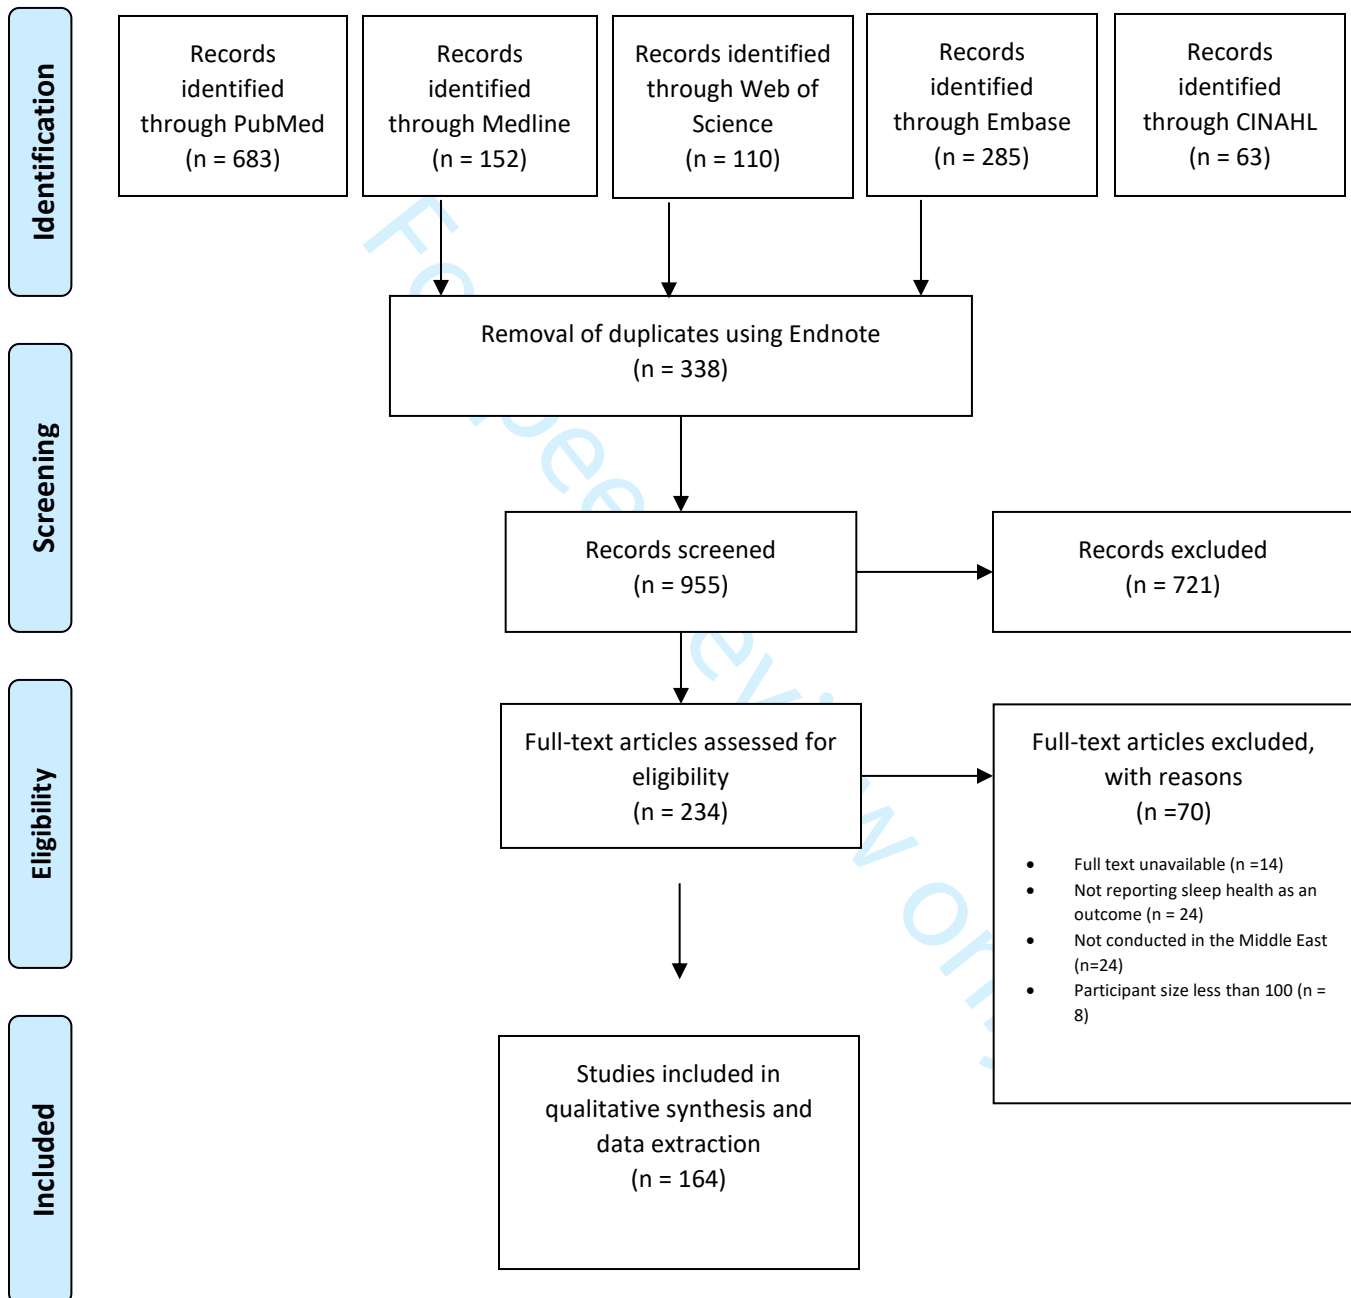

Table S1. Search keywords and MeSH terms developed for the literature search

**Journal Databases Keyword Strategy**

## Search Keywords

**1) Generic Exposure of Interest – COVID-19**

('coronavirus disease 2019' OR '2019 novel coronavirus disease' OR '2019 novel coronavirus epidemic' OR '2019 novel coronavirus infection' OR '2019-ncov disease' OR '2019-ncov infection' OR 'covid' OR 'covid 19' OR 'covid 19 induced pneumonia' OR 'covid 2019' OR 'covid-10' OR 'covid-19' OR 'covid-19 induced pneumonia' OR 'covid-19 pneumonia' OR 'covid19' OR 'sars coronavirus 2 infection' OR 'sars coronavirus 2 pneumonia' OR 'sars-cov-2 disease' OR 'sars-cov-2 infection' OR 'sars-cov-2 pneumonia' OR 'sars-cov2 disease' OR 'sars-cov2 infection' OR 'sarscov2 disease' OR 'sarscov2 infection' OR 'wuhan coronavirus disease' OR 'wuhan coronavirus infection' OR 'coronavirus disease 2' OR 'coronavirus disease 2010' OR 'coronavirus disease 2019' OR 'coronavirus disease 2019 pneumonia' OR 'coronavirus disease-19' OR 'coronavirus infection 2019' OR 'ncov 2019 disease' OR 'ncov 2019 infection' OR 'new coronavirus pneumonia' OR 'novel coronavirus 2019 disease' OR 'novel coronavirus 2019 infection' OR 'novel coronavirus disease 2019' OR 'novel coronavirus infected pneumonia' OR 'novel coronavirus infection 2019' OR 'novel coronavirus pneumonia' OR 'paucisymptomatic coronavirus disease 2019' OR 'severe acute respiratory syndrome 2' OR 'severe acute respiratory syndrome 2 pneumonia' OR 'severe acute respiratory syndrome cov-2 infection' OR 'severe acute respiratory syndrome coronavirus 2 infection' OR 'severe acute respiratory syndrome coronavirus 2019 infection')

AND

**2) Outcome of Interest - sleep health**

('sleep' OR 'sleep' OR 'sleeping' OR 'sleep disorder' OR 'chronobiology disorders' OR 'disturbances of sleep' OR 'dyssomnia' OR 'dyssomnias' OR 'intrinsic sleep disorders' OR 'sleep disorder' OR 'sleep disorders' OR 'sleep disorders, intrinsic' OR 'sleep disturbance' OR 'sleep perturbation' OR 'sleep wake disorder' OR 'sleep wake disorders' OR 'sleep disordered breathing' OR 'apnea, sleep' OR 'apnoea, sleep' OR 'nocturnal apnea' OR 'nocturnal apnoea' OR 'obstructive sleep apnea' OR 'obstructive sleep apnea hypopnea syndrome' OR 'obstructive sleep apnea syndrome' OR 'obstructive sleep apnoea' OR 'obstructive sleep apnoea hypopnoea syndrome' OR 'obstructive sleep apnoea syndrome' OR 'obstructive sleep-disordered breathing' OR 'sleep apnea' OR 'sleep apnea syndrome' OR 'sleep apnea syndromes' OR 'sleep apnea, obstructive' OR 'sleep apnoea' OR 'sleep apnoea syndrome' OR 'sleep apnoea syndromes' OR 'sleep apnoea, obstructive' OR 'sleep disordered breathing')

AND

**3) Population of Interest - Middle Eastern populations**

('middle east' OR 'middle east' OR 'bahrain' OR 'cyprus' OR 'iraq' OR 'kuwait' OR 'saudi' OR 'saudi arabia' OR 'oman' OR 'omani' OR 'jordan' OR 'jordanian' OR 'bahraini' OR 'cypriot' OR 'lebanese' OR 'lebanon' OR 'kuwaiti' OR 'iran' OR 'iranian (citizen)' OR 'israel' OR 'israeli' OR 'gaza strip palestine' OR 'gaza strip' OR 'palestine' OR 'syrian' OR 'syrian arab republic' OR 'egypt' OR 'egyptian' OR 'yemen' OR 'yemeni' OR 'united arab emirates' OR 'emirati' OR 'turkey (republic)' OR 'turkish' OR 'eastern mediterranean region' OR 'qatar' OR 'qatari' OR 'algeria' OR 'algerian' OR 'tunisia' OR 'tunisian' OR 'morocco' OR 'morrocon' OR 'libya' OR 'libyan')

Table S2. List of countries considered in MENA definition in this study.

| Country              |
|----------------------|
| Algeria              |
| Bahrain              |
| Egypt                |
| Iran                 |
| Iraq                 |
| Israel               |
| Jordan               |
| Kuwait               |
| Lebanon              |
| Libya                |
| Morocco              |
| Oman                 |
| Qatar                |
| Saudi Arabia         |
| Syria                |
| Tunisia              |
| United Arab Emirates |
| Yemen                |

Table S3. Newcastle-Ottawa Scale for Bias Assessment

| Study                    | Total Score | Selection                        |             |                 | Comparability              | Outcome                      |                       |
|--------------------------|-------------|----------------------------------|-------------|-----------------|----------------------------|------------------------------|-----------------------|
|                          |             | Representativeness of the sample | Sample size | Non-respondents | Ascertainments of exposure | Based on design and analysis | Assessment of Outcome |
| Özenoğlu et al., 2021    | 6           | *                                | *           |                 | *                          | *                            | *                     |
| Çolak et al., 2021       | 8           | *                                | *           |                 | **                         | *                            | **                    |
| Abbas et al., 2021       | 6           | *                                | *           |                 | *                          | *                            | *                     |
| Abdelghani et al., 2021  | 7           | *                                | *           |                 | **                         | *                            | *                     |
| Abdoli et al., 2021      | 9           | *                                | *           | *               | **                         | **                           | *                     |
| Alah et al., 2022        | 8           | *                                | *           | *               | **                         | *                            | *                     |
| Abouzid et al., 2021     | 8           | *                                | *           | *               | **                         | *                            | *                     |
| Abu-Elnenin et al., 2021 | 9           | *                                | *           | *               | **                         | **                           | *                     |
| Ahorsu et al., 2020      | 8           | *                                | *           | *               | *                          | *                            | **                    |
| Akbari et al., 2021      | 7           | *                                | *           |                 | **                         | *                            | *                     |
| Akbarpour et al., 2022   | 6           | *                                | *           |                 | *                          | *                            | *                     |
| Al Ammari et al., 2021   | 9           | *                                | *           | *               | **                         | **                           | *                     |
| Al Maqbali et al., 2021  | 10          | *                                | *           | *               | **                         | **                           | **                    |
| Al Miskry et al., 2021   | 9           | *                                | *           | *               | **                         | **                           | *                     |

1  
2  
3  
4  
5  
6  
7  
8  
9  
10  
11  
12  
13  
14  
15  
16  
17  
18  
19  
20  
21  
22  
23  
24  
25  
26  
27  
28  
29  
30  
31  
32  
33  
34  
35  
36  
37  
38  
39  
40  
41  
42  
43  
44  
45  
46  
47

|                          |   |   |   |   |    |    |    |   |
|--------------------------|---|---|---|---|----|----|----|---|
| Al Mukhaini et al., 2021 | 7 | * | * |   | ** | *  | *  | * |
| Al Ajlouni et al., 2022  | 8 | * | * | * | ** | *  | *  | * |
| Al Ajlouni et al., 2020  | 8 | * | * | * | ** | *  | *  | * |
| Al Musharaf et al., 2020 | 9 | * | * | * | ** | ** | *  | * |
| Al Mutawa et al., 2021   | 9 | * | * | * | ** | ** | *  | * |
| Al Rahamneh et al., 2021 | 6 | * | * |   | *  | *  | *  | * |
| Al Saleh et al., 2021    | 7 | * | * | * | *  | *  | *  | * |
| Al Anazi et al., 2022    | 6 | * | * |   | *  | *  | *  | * |
| Alboghdady et al., 2022  | 6 | * |   |   | ** | *  | *  | * |
| Alfawaz et al., 2021     | 6 | * | * |   | *  | *  | *  | * |
| Alghamdi et al., 2022    | 6 | * |   |   | ** | *  | *  | * |
| AlGhuffli et al., 2021   | 6 | * |   |   | ** | *  | *  | * |
| AlHadi et al., 2021      | 8 | * | * | * | ** | *  | *  | * |
| Alharbi et al., 2021     | 8 | * | * | * | ** | *  | *  | * |
| Alkhotani et al., 2020   | 8 |   | * |   | ** | ** | ** | * |
| Alhurishi et al., 2021   | 5 |   |   |   | ** | *  | *  | * |
| Ali et al., 2022         | 6 | * |   | * | *  | *  | *  | * |

For peer review only

1  
2  
3  
4  
5  
6  
7  
8  
9  
10  
11  
12  
13  
14  
15  
16  
17  
18  
19  
20  
21  
22  
23  
24  
25  
26  
27  
28  
29  
30  
31  
32  
33  
34  
35  
36  
37  
38  
39  
40  
41  
42  
43  
44  
45  
46  
47

|                         |   |   |   |   |    |    |    |   |
|-------------------------|---|---|---|---|----|----|----|---|
| Ali et al., 2021        | 6 | * |   |   | ** | *  | *  | * |
| Aljemaiah et al., 2021  | 6 | * |   |   | ** | *  | *  | * |
| Aljuffali et al., 2022  | 9 | * | * | * | ** | ** | *  | * |
| Almhdawi et al., 2022   | 7 | * | * |   | ** | *  | *  | * |
| Almhizai et al., 2021   | 5 | * |   |   | *  | *  | *  | * |
| Almugti et al., 2021    | 7 | * | * |   | ** | *  | *  | * |
| Alnofaiey et al., 2020  | 7 | * | * |   | ** | *  | *  | * |
| Alomari et al., 2021    | 6 | * | * |   | *  | *  | *  | * |
| Alothman et al., 2021   | 9 | * | * | * | ** | ** | *  | * |
| Alqahtani et al., 2021  | 8 | * | * | * | ** | *  | *  | * |
| Alrashed et al., 2021   | 5 |   |   |   | ** | *  | *  | * |
| AlRasheed et al., 2022  | 8 | * | * | * | ** | *  | *  | * |
| Alshammari et al., 2021 | 4 |   |   | * | *  | *  | *  |   |
| Alshekaili et al., 2020 | 7 | * | * |   | ** | *  | *  | * |
| Alshumrani et al., 2022 | 8 | * | * |   | ** | *  | ** | * |
| Alsulimani et al., 2021 | 6 | * | * |   | *  | *  | *  | * |
| Araç et al., 2020       | 7 | * |   |   | ** | ** | *  | * |

For peer review only



1  
2  
3  
4  
5  
6  
7  
8  
9  
10  
11  
12  
13  
14  
15  
16  
17  
18  
19  
20  
21  
22  
23  
24  
25  
26  
27  
28  
29  
30  
31  
32  
33  
34  
35  
36  
37  
38  
39  
40  
41  
42  
43  
44  
45  
46  
47

|                            |   |   |   |    |    |    |   |
|----------------------------|---|---|---|----|----|----|---|
| Arafa et al., 2020         | 7 | * | * | ** | *  | *  | * |
| Arafa et al., 2021         | 7 | * |   | ** | ** | *  | * |
| Aslan et al., 2021         | 7 | * | * | ** | *  | *  | * |
| Athamneh et al., 2021      | 6 | * |   | *  | *  | ** | * |
| Aydin Sayilan et al., 2021 | 7 | * | * | ** | *  | *  | * |
| Şentürk et al., 2021       | 6 | * |   | ** | *  | *  | * |
| Büber et al., 2022         | 6 | * |   | ** | *  | *  | * |
| Badahdah et al., 2020      | 5 | * |   | ** | *  | *  | * |
| Badri et al., 2021         | 7 | * | * | *  | *  | *  | * |
| Bar-zeev et al., 2022      | 6 | * | * | *  | *  | *  | * |
| Barbato et al., 2021       | 6 | * |   | ** | *  | *  | * |
| Bilgiç et al., 2021        | 6 | * |   | ** | *  | *  | * |
| Bağcı et al., 2021         | 8 | * | * | *  | ** | *  | * |
| Bucak et al., 2021         | 6 | * |   | ** | *  | *  | * |
| Bulut et al., 2021         | 7 | * | * | ** | *  | *  | * |
| Cahal et al., 2021         | 5 | * |   | *  | *  | *  | * |
| Cakmak et al., 2022        | 6 |   | * | ** | *  | *  | * |

For peer review only

1  
2  
3  
4  
5  
6  
7  
8  
9  
10  
11  
12  
13  
14  
15  
16  
17  
18  
19  
20  
21  
22  
23  
24  
25  
26  
27  
28  
29  
30  
31  
32  
33  
34  
35  
36  
37  
38  
39  
40  
41  
42  
43  
44  
45  
46  
47

|                            |   |   |   |   |    |   |    |   |
|----------------------------|---|---|---|---|----|---|----|---|
| Chan et al., 2021          | 8 | * | * | * | ** | * | *  | * |
| Cheikh Ismail et al., 2021 | 6 | * |   |   | ** | * | *  | * |
| Cheikh Ismail et al., 2020 | 6 | * |   |   | ** | * | *  | * |
| Cigiloglu et al., 2020     | 6 | * |   |   | ** | * | *  | * |
| Coiro et al., 2021         | 6 | * |   |   | ** | * | *  | * |
| Duran et al., 2021         | 7 | * | * |   | ** | * | *  | * |
| Durmaz Engin et al., 2021  | 7 | * | * |   | ** | * | *  | * |
| El Refay et al., 2021      | 6 | * |   |   | ** | * | *  | * |
| Elghazally et al., 2021    | 6 | * |   |   | ** | * | *  | * |
| Elgohary et al., 2021      | 6 |   | * |   | ** | * | *  | * |
| Elkholy et al., 2021       | 7 | * | * |   | ** | * | *  | * |
| Ellakani et al., 2022      | 5 | * |   |   | *  | * | *  | * |
| Elsalem et al., 2020       | 5 |   | * |   | *  | * | *  | * |
| Eren et al., 2021          | 7 | * | * |   | ** | * | *  | * |
| Gol et al., 2021           | 7 | * | * |   | ** | * | *  | * |
| Guc et al., 2022           | 8 | * |   | * | ** | * | ** | * |
| Galali et al., 2021        | 5 | * |   |   | *  | * | *  | * |

For peer review only

1  
2  
3  
4  
5  
6  
7  
8  
9  
10  
11  
12  
13  
14  
15  
16  
17  
18  
19  
20  
21  
22  
23  
24  
25  
26  
27  
28  
29  
30  
31  
32  
33  
34  
35  
36  
37  
38  
39  
40  
41  
42  
43  
44  
45  
46  
47

|                             |   |   |   |    |    |   |   |
|-----------------------------|---|---|---|----|----|---|---|
| Ghanamah et al., 2021       | 5 | * |   | *  | *  | * | * |
| Gokseven et al., 2021       | 6 | * |   | ** | *  | * | * |
| Goweda et al., 2021         | 5 |   |   | ** | *  | * | * |
| Grande et al., 2021         | 7 |   | * | ** | ** | * | * |
| Hadar-Shoval et al., 2021   | 7 | * | * | ** | *  | * | * |
| Hammoudi et al., 2021       | 6 | * |   | ** | *  | * | * |
| Hammouri et al., 2022       | 5 | * |   | *  | *  | * | * |
| Hawari et al., 2021         | 6 | * |   | ** | *  | * | * |
| Husain et al., 2021         | 6 | * | * | *  | *  | * | * |
| Hussien et al., 2020        | 7 | * | * | ** | *  | * | * |
| Iqbal et al., 2021          | 7 | * | * | ** | *  | * | * |
| Jahrami et al., 2021        | 7 | * |   | ** | ** | * | * |
| Jalal et al., 2021          | 8 | * | * | ** | ** | * | * |
| Kamaleddine et al., 2022    | 5 |   |   | ** | *  | * | * |
| Kandemir et al., 2021       | 6 | * |   | ** | *  | * | * |
| Karabulut et al., 2021      | 5 |   |   | ** | *  | * | * |
| Karahan Yilmaz et al., 2021 | 5 | * |   | *  | *  | * | * |

For peer review only

1  
2  
3  
4  
5  
6  
7  
8  
9  
10  
11  
12  
13  
14  
15  
16  
17  
18  
19  
20  
21  
22  
23  
24  
25  
26  
27  
28  
29  
30  
31  
32  
33  
34  
35  
36  
37  
38  
39  
40  
41  
42  
43  
44  
45  
46  
47

|                          |   |   |   |    |   |   |   |
|--------------------------|---|---|---|----|---|---|---|
| Karatel et al., 2022     | 6 | * |   | ** | * | * | * |
| Keskin et al., 2022      | 5 |   |   | ** | * | * | * |
| Khamis et al., 2020      | 6 | * |   | ** | * | * | * |
| Kheirallah et al., 2021  | 6 | * | * | *  | * | * | * |
| Kilani et al., 2020      | 6 | * |   | ** | * | * | * |
| Kolokotorni et al., 2021 | 6 | * |   | ** | * | * | * |
| Korkmaz et al., 2020     | 5 |   |   | ** | * | * | * |
| Lin et al., 2022         | 7 | * | * | ** | * | * | * |
| Lin et al., 2020         | 5 | * |   | *  | * | * | * |
| Maatouk et al., 2022     | 6 | * |   | ** | * | * | * |
| Mahamid et al., 2021     | 6 | * |   | ** | * | * | * |
| Masoumi et al., 2021     | 5 |   |   | ** | * | * | * |
| Mekkawy et al., 2022     | 6 | * |   | ** | * | * | * |
| Meo et al., 2022         | 7 | * | * | ** | * | * | * |
| Mosheva et al., 2020     | 6 | * |   | ** | * | * | * |
| Mousavi et al., 2021     | 7 | * | * | ** | * | * | * |
| Najafipour et al., 2021  | 6 | * |   | ** | * | * | * |

For peer review only

1  
2  
3  
4  
5  
6  
7  
8  
9  
10  
11  
12  
13  
14  
15  
16  
17  
18  
19  
20  
21  
22  
23  
24  
25  
26  
27  
28  
29  
30  
31  
32  
33  
34  
35  
36  
37  
38  
39  
40  
41  
42  
43  
44  
45  
46  
47

|                                   |   |   |   |   |    |    |   |   |
|-----------------------------------|---|---|---|---|----|----|---|---|
| Nakhostin-Ansaeri et al., 2021    | 6 | * |   |   | ** | *  | * | * |
| Nakhostin-Ansari et al., 2020     | 5 | * |   |   | *  | *  | * | * |
| Nashwan et al., 2021              | 5 |   |   |   | ** | *  | * | * |
| Okudan et al., 2021               | 6 | * |   |   | ** | *  | * | * |
| Oteir et al., 2022                | 8 | * | * | * | ** | *  | * | * |
| Radwan et al., 2021               | 6 | * |   | * | *  | *  | * | * |
| Ranjbar et al., 2021              | 6 | * | * |   | *  | *  | * | * |
| Romdhani et al., 2021             | 7 | * | * |   | ** | *  | * | * |
| Saadeh et al., 2021               | 7 | * |   |   | ** | ** | * | * |
| Sadeghniaat-Haghighi et al., 2021 | 6 | * |   |   | ** | *  | * | * |
| Salehinejad et al., 2020          | 6 | * |   |   | ** | *  | * | * |
| Salman et al., 2021               | 6 | * |   |   | ** | *  | * | * |
| Salman et al., 2021               | 6 | * |   |   | ** | *  | * | * |
| San et al., 2021                  | 5 |   |   |   | ** | *  | * | * |
| Sarsak 2022                       | 6 | * |   |   | ** | *  | * | * |
| Seyahi et al., 2020               | 7 | * |   | * | ** | *  | * | * |
| Sis Celik et al., 2021            | 5 | * |   |   | *  | *  | * | * |

For peer review only

1  
2  
3  
4  
5  
6  
7  
8  
9  
10  
11  
12  
13  
14  
15  
16  
17  
18  
19  
20  
21  
22  
23  
24  
25  
26  
27  
28  
29  
30  
31  
32  
33  
34  
35  
36  
37  
38  
39  
40  
41  
42  
43  
44  
45  
46  
47

|                                 |   |   |   |   |    |    |    |   |
|---------------------------------|---|---|---|---|----|----|----|---|
| Sultan et al., 2021             | 6 | * | * |   | *  | *  | *  | * |
| Tas et al., 2021                | 5 |   | * |   | *  | *  | *  | * |
| Tasdemir Yigitoglu et al., 2021 | 7 | * | * |   | ** | *  | *  | * |
| Toprak Celenay et al., 2020     | 6 | * |   |   | ** | *  | *  | * |
| Torkian et al., 2021            | 6 | * |   |   | ** | *  | *  | * |
| Torun et al., 2021              | 6 |   |   | * | ** | *  | *  | * |
| Ustuner Top et al., 2022        | 6 | * |   |   | ** | *  | *  | * |
| Yilmaz et al., 2021             | 6 | * |   |   | ** | *  | *  | * |
| Yalcin et al., 2022             | 8 | * | * | * | ** | *  | *  | * |
| Yeni et al., 2022               | 6 |   |   |   | ** | *  | ** | * |
| Yilmaz et al., 2021             | 8 | * | * | * | ** | *  | *  | * |
| Yilmaz et al., 2021             | 6 | * |   |   | ** | *  | *  | * |
| Younes et al., 2021             | 7 | * | * |   | ** | *  | *  | * |
| Youssef et al., 2020            | 7 | * |   |   | ** | ** | *  | * |
| Yurumez Korkmaz et al., 2021    | 6 |   |   |   | ** | ** | *  | * |
| Zach et al., 2021               | 7 | * | * |   | ** | *  | *  | * |
| Zarzour et al., 2021            | 6 | * |   |   | ** | *  | *  | * |

1  
2  
3  
4  
5  
6  
7  
8  
9  
10  
11  
12  
13  
14  
15  
16  
17  
18  
19  
20  
21  
22  
23  
24  
25  
26  
27  
28  
29  
30  
31  
32  
33  
34  
35  
36  
37  
38  
39  
40  
41  
42  
43  
44  
45  
46  
47

Zengin et al., 2021

7

\*

\*

\*\*

\*

\*

\*

Zreik et al., 2021

6

\*

\*\*

\*

\*

\*

For peer review only

Table S4. Results of full literature review, tabulated by sub-population

| Adults               |                                                                                                                |                                                                                                                                                                 |             |                       |                                                                                     |                           |                                                                                                                                                                                                                                                                                                                                                                                                                                                |
|----------------------|----------------------------------------------------------------------------------------------------------------|-----------------------------------------------------------------------------------------------------------------------------------------------------------------|-------------|-----------------------|-------------------------------------------------------------------------------------|---------------------------|------------------------------------------------------------------------------------------------------------------------------------------------------------------------------------------------------------------------------------------------------------------------------------------------------------------------------------------------------------------------------------------------------------------------------------------------|
| Reference            | Location of Study                                                                                              | Population                                                                                                                                                      | Sample Size | Study Design          | Sleep Health Measurement Tool                                                       | Sleep Health Domains      | Main Findings                                                                                                                                                                                                                                                                                                                                                                                                                                  |
| Abouzid et al., 2021 | Egypt, Jordan, United Arab Emirates, Kuwait, Bahrain, Saudi Arabia, Oman, Qatar, Yemen, Syria, Palestine. Iraq | 5896 respondents were included. The participants were aged between 8–23 years (45%; 24–30, 20.5%; 31–40, 18.6%; 41–60, 13.6%; >40, 2.3%) and 62.8% were females | 5896        | Cross-sectional study | Survey items developed by the study's author including questions on sleep duration. | Sleep duration            | 49.6% reported they were sleeping less than 7 h and the sleeping hours increased to 7–10 h. for 53.2%                                                                                                                                                                                                                                                                                                                                          |
| Ahorsu et al., 2020  | Qazvin, Iran                                                                                                   | older adults (50 or older) with a mean age of 57.72 (SD = 7.31) 62% male                                                                                        | 413         | Cross-sectional study | Insomnia Severity Index (ISI)                                                       | Sleep disorder (insomnia) | fear of COVID-19 was a significant mediator (unstandardized coefficient = 0.360; LLCI = 0.112; ULCI = 0.664) in the association between perceived health status and insomnia, significant direct effects of perceived health status on fear of COVID-19 and insomnia (unstandardized coefficient of 1.621; SE = 0.378; p < .001) as well as a significant total effect on insomnia (unstandardized coefficient of 1.981; SE = 0.392; p < .001) |
| Akbari et al., 2021  | Iran                                                                                                           | adults (mean age 30±11 years, 54.3% female)                                                                                                                     | 3,323       | Cross-sectional       | Pittsburgh Sleep Quality Index (PSQI)                                               | Sleep quality             | Inactive participants (IPs) scored significantly lower (p < 0.001) on the global score of sleep-quality than active participants (APs) (mean ± SD, 6.04±2.95, 5.59±2.94, respectively). No significant differences in inactive subgroups. Significant differences in active subgroups (p=0.003) APs that maintained                                                                                                                            |



|                         |                      |                                                                                                                                                                                                                                                             |       |                       |                                                                                            |                                             |                                                                                                                                                                                                                                                                                                                                                                                                                                                                                                                                                                                                                                                     |
|-------------------------|----------------------|-------------------------------------------------------------------------------------------------------------------------------------------------------------------------------------------------------------------------------------------------------------|-------|-----------------------|--------------------------------------------------------------------------------------------|---------------------------------------------|-----------------------------------------------------------------------------------------------------------------------------------------------------------------------------------------------------------------------------------------------------------------------------------------------------------------------------------------------------------------------------------------------------------------------------------------------------------------------------------------------------------------------------------------------------------------------------------------------------------------------------------------------------|
|                         |                      |                                                                                                                                                                                                                                                             |       |                       |                                                                                            |                                             | their activity levels had better sleep quality. Sleep quality after COVID-19: Sleep habits of 49.3% of individuals (APs= 49.5% and IPs= 49.1%) had changed, so that 39.8% of them slept later; sleep time of 44.6% of individuals (APs= 43.7% and IPs= 45.5%) had changed, so that 28.7% of them slept more; and a significant portion of them (APs= 36.7% and IPs= 42.2%) were dissatisfied with their sleep habit changes                                                                                                                                                                                                                         |
| Akbarpour et al., 2022  | Iran                 | 1223 individuals with a mean age of 39.82 ± 10.75 years participated in the study.                                                                                                                                                                          | 1223  | Cross-sectional study | Insomnia Severity Index                                                                    | Sleep problems (insomnia)                   | Prevalence of insomnia 55.2%<br>Being married was associated with less risk for insomnia (OR= 0.69, CI-95%= 0.52-0.91).                                                                                                                                                                                                                                                                                                                                                                                                                                                                                                                             |
| Al Miskry et al., 2021  | United Arab Emirates | 737 participants: 60.7% (n = 447) university students, 27.4% (n = 202) faculty members, and 11.9% (n = 88) staff selected through the convenience sampling method.<br>72.6% (n = 535) of the participants were females, whereas 27.4% (n = 202) were males. | 737   | Cross-sectional study | Survey items developed by the study's author including questions on sleeping difficulties. | Sleep problems (sleep pattern disturbances) | 19.5% experienced changes in sleep patterns                                                                                                                                                                                                                                                                                                                                                                                                                                                                                                                                                                                                         |
| Al-Ajlouni et al., 2020 | Jordan               | mean age 37.35 (SD=11.01), with over 60% aged <40 years<br>52.9% male                                                                                                                                                                                       | 1,240 | Cross-sectional study | Pittsburgh Sleep Quality Index (PSQI)                                                      | Sleep quality                               | over 60% of participants reported having experienced at least one sleep problem in the last week, and nearly half reported having had short sleep duration. Participants reporting mild anxiety were more likely to experience poor sleep quality (aPR = 3.01; 95% CI=2.07 to 4.35), short sleep duration (aPR = 1.35; 95% CI=1.17 to 1.56) and at least one sleep problem (aPR=1.41; 95% CI=1.27 to 1.56). Those reporting moderate anxiety were more likely to experience poor sleep quality (aPR=5.78; 95% CI=3.97 to 8.43), short sleep duration (aPR=1.73; 95% CI=1.47 to 2.04) and at least one sleep problem (aPR=1.56; 95% CI=1.39 to 1.75) |

|                          |                                                                      |                                                                                                                                                                                                           |       |                       |                                       |                                 |                                                                                                                                                                                                                                                                                                                                                                                                                                                                                                                                                                                                                          |
|--------------------------|----------------------------------------------------------------------|-----------------------------------------------------------------------------------------------------------------------------------------------------------------------------------------------------------|-------|-----------------------|---------------------------------------|---------------------------------|--------------------------------------------------------------------------------------------------------------------------------------------------------------------------------------------------------------------------------------------------------------------------------------------------------------------------------------------------------------------------------------------------------------------------------------------------------------------------------------------------------------------------------------------------------------------------------------------------------------------------|
|                          |                                                                      |                                                                                                                                                                                                           |       |                       |                                       |                                 | compared with those reporting minimal anxiety. Corresponding to the dose–response relationship between anxiety and sleep health outcomes, those reporting severe anxiety were the most likely to experience poor sleep quality (aPR = 8.954; 95% CI = 6.12 to 13.08), short sleep duration (aPR = 2.23; 95% CI=1.91 to 2.61) and at least one sleep problem (aPR=1.73; 95% CI=1.54 to 1.95) P-trend <0.001 for all sleep outcomes                                                                                                                                                                                        |
| Al-Ajlouni et al., 2022  | Jordan                                                               | 60% less than 40 years old, mean age of 37.4 (SD = 11.0) 52.9% male                                                                                                                                       | 1,240 | Cross-sectional study | Pittsburgh Sleep Quality Index (PSQI) | Sleep quality                   | Participants who did not meet the guidelines for moderate-to-vigorous physical activity (MVPA) had higher prevalence of poor sleep quality (aPR = 1.68; 95% CI = 1.24–2.26), short sleep duration (aPR = 1.15; 95% CI = 1.00–1.31), and sleep problems (aPR = 1.22; 95% CI = 1.10–1.35)                                                                                                                                                                                                                                                                                                                                  |
| Al-Musharaf et al., 2020 | Saudi Arabia                                                         | A total of 638 young women, with a mean age of 22.0 years ± 1.9 years, were studied. More than half of the women (413; 60%) were undergraduates, and the majority of the sample was unemployed (579; 91%) | 638   | Cross-sectional study | Pittsburgh Sleep Quality Index        | Sleep Quality<br>Sleep duration | PHQ-9 score was positively correlated with the global PSQI score ( $r = 0.25$ , $p < 0.001$ ) and negatively correlated with the duration of sleep (h/day) ( $r = -0.18$ , $p < 0.001$ )<br>GAD-7 anxiety score was positively correlated with a higher global PSQI score (worse sleep) ( $r = 0.178$ , $p < 0.001$ ) and negatively correlated with duration of sleep (hours/day) ( $r = -0.21$ , $p < 0.001$ )<br>The stress score was positively correlated a higher global PSQI (worse sleep) ( $r = 0.159$ , $p < 0.001$ ) and negatively correlated with duration of sleep (h/day) ( $r = -0.196$ , $p < 0.001$ ). |
| Al-Mutawa et al., 2021   | Kuwait, Qatar, Saudi Arabia, Bahrain, United Arab Emirates, and Oman | 14,171 participants, 67.3% females and 60.4% younger than 35 years old. 64.2% from Kuwait                                                                                                                 | 14171 | Cross-sectional study | Insomnia Severity Index               | Sleep problems (insomnia)       | Insomnia among Omani participants was 48.4% UAE participants 66.7%<br><br>Participants in UAE (AOR = 1.455; 1.209–1.750) and Kuwait (AOR = 1.412; 1.244–1.602) were 40% more likely to show insomnia symptoms than participants in Oman.<br><br>Females were also shown to be more susceptible to insomnia during the pandemic since they were 55% more likely to report sleeping problems compared to males                                                                                                                                                                                                             |

|                       |              |                                                                                                                                               |      |                       |                                                                                        |                                 |                                                                                                                                                                                                                                                                                                                                                                                                                                                                                                                                                                                                                                                                                                                                                                                                                                                                                                                                                                                                                                                                                                                                                                                                                                                                                                                                     |
|-----------------------|--------------|-----------------------------------------------------------------------------------------------------------------------------------------------|------|-----------------------|----------------------------------------------------------------------------------------|---------------------------------|-------------------------------------------------------------------------------------------------------------------------------------------------------------------------------------------------------------------------------------------------------------------------------------------------------------------------------------------------------------------------------------------------------------------------------------------------------------------------------------------------------------------------------------------------------------------------------------------------------------------------------------------------------------------------------------------------------------------------------------------------------------------------------------------------------------------------------------------------------------------------------------------------------------------------------------------------------------------------------------------------------------------------------------------------------------------------------------------------------------------------------------------------------------------------------------------------------------------------------------------------------------------------------------------------------------------------------------|
|                       |              |                                                                                                                                               |      |                       |                                                                                        |                                 | <p>All age groups younger than 35 years old were about 3 times more likely to show insomnia symptoms than age group &gt;65. The most susceptible age group was shown to be 18 to 24 years old with an adjusted odds ratio of 3.286. Divorced individuals were 31.5% more likely to have sleeping problems than married individuals.</p> <p>Students (AOR = 1.422; 1.227–1.647) were 42%, and unemployed individuals (AOR = 1.305; 1.171–1.454) were 30% more likely to experience sleeping problems.</p> <p>Non-smokers were also 36.5% less likely to report any sign of insomnia than smokers (AOR = 0.635; 0.578–0.698) participants with underlying psychological disorders were 2.1 times (AOR = 2.098; 1.831–2.404) and individuals with underlying medical conditions 34% more likely to experience any symptom of insomnia (AOR = 1.340; 1.218–1.474).</p> <p>Regarding the duration of lockdown, participants who were in no lockdown or experienced the lockdown for &lt;7 days were 18.2% less likely to show insomnia symptoms (AOR = 0.818; 0.746–0.897) compared to those who were in lockdown for more than 30 days. Finally, participants who were never infected with COVID-19 were 18.1% less likely to experience sleep problems than those who contracted COVID-19 at least once (AOR = 0.819; 0.672–0.998)</p> |
| Al-Saleh et al., 2021 | Saudi Arabia | 1641 respondents were included in the current survey. Male participants were 733 (44.7%) and 61.1% of the participants aged 35 years or more. | 1641 | Cross-sectional study | Survey items developed by the study's author including questions on sleeping duration. | Sleep duration                  | Daily sleep hours for less than 8 hours were recorded for 662 (40.3%) participants and family troubles was reported by 44% of the respondents. Poor sleep hygiene was significantly higher among males than females.                                                                                                                                                                                                                                                                                                                                                                                                                                                                                                                                                                                                                                                                                                                                                                                                                                                                                                                                                                                                                                                                                                                |
| Alah et al., 2022     | Qatar        | 1061 participants. Majority were men (757; 71.3%), 35 to 54 years                                                                             | 1061 | Cross-sectional study | Survey items developed by the study's author                                           | Sleep duration<br>Sleep quality | 488 (46%) reported an increase in sleep duration, 149 (14%) reported a decrease. The mean sleep duration increased significantly                                                                                                                                                                                                                                                                                                                                                                                                                                                                                                                                                                                                                                                                                                                                                                                                                                                                                                                                                                                                                                                                                                                                                                                                    |

For peer review only

|                       |              |                                                                                                                                                                                                                                                                                                                  |      |                       |                                                                                                |                                                                                   |                                                                                                                                                                                                                                                                                                                                                                                                                                                                                                                                                                                                                                                            |
|-----------------------|--------------|------------------------------------------------------------------------------------------------------------------------------------------------------------------------------------------------------------------------------------------------------------------------------------------------------------------|------|-----------------------|------------------------------------------------------------------------------------------------|-----------------------------------------------------------------------------------|------------------------------------------------------------------------------------------------------------------------------------------------------------------------------------------------------------------------------------------------------------------------------------------------------------------------------------------------------------------------------------------------------------------------------------------------------------------------------------------------------------------------------------------------------------------------------------------------------------------------------------------------------------|
|                       |              | old (585; 55.1%), married (850; 80.1%), and have completed college or a higher degree of education (832; 78.4%). Over 50 nationalities were reported by participants with the most common being Indian nationality (56.6%). Only 37 (3.5%) Qatari nationals participated. 565 (53.3%) shifted to work from home. |      |                       | including questions on sleep duration and sleep quality                                        |                                                                                   | from 6.90h/d before to 7.78h/d during home confinement (0.89 hour mean difference, 95% CI: 0.74 to 1.04, P<0.001).<br><br>165 (29.2%) of those working from home and 131 (26.4%) of those who continued working regularly reported poorer sleep quality during home confinement as compared with before.                                                                                                                                                                                                                                                                                                                                                   |
| Alfawaz et al., 2021  | Saudi Arabia | Students, staff and faculty of King Saud University<br>47% (726) of the study participants were males and 53% (816) were females. A large proportion of participants were from the age-group of 20–45 years (1229, 79.7%) and most were educated either up to graduate or higher level (1434, 93%).              | 1542 | Cross-sectional study | Survey items developed by the study's author including questions on sleep problems (insomnia). | Sleep problems (insomnia)                                                         | 496 (32.2%) of the participants reported suffering from insomnia constantly (233, 15.1%) or sometimes (263, 17.1%) during lockdown.                                                                                                                                                                                                                                                                                                                                                                                                                                                                                                                        |
| Alghamdi et al., 2022 | Saudi Arabia | Females (n = 236, 64.13%), single (n = 356, 96.74%), and in their senior year (n = 256, 69.57%). The mean age of the participants was 20.4 ± 1.6 years (range: 18–26 years)                                                                                                                                      | 382  | Cross-sectional study | Generalized Sleep Disturbance Scale                                                            | Sleep duration<br>Sleep quality<br>Sleep problems (sleep disturbance, nightmares) | Most participants did not suffer from the presence of nightmares during the quarantine period (n = 251, 68.21%); however, (n = 52, 20.72%) experienced new-onset nightmares when the quarantine started. The presence of nightmares was more significant among females (n = 86; 73.8%) than males (n = 31; 26.5%, $\chi^2(1) = 6.5$ ; p = 0.010.)<br>Male participants with statistically significant nightmares reported frequent early waking from sleep (n = 24, 58.54%) and frequent daytime sleepiness (n = 20, 48.78%). On the other hand, female participants with statistically significant nightmares reported frequent difficulty falling asleep |

|                      |              |                                                                                                                                                                                                                                                                                |      |                       |                                                                        |                                                              |                                                                                                                                                                                                                                                                                                                                                                                                                                                                                                                                                                                                                                                                                                                                                 |
|----------------------|--------------|--------------------------------------------------------------------------------------------------------------------------------------------------------------------------------------------------------------------------------------------------------------------------------|------|-----------------------|------------------------------------------------------------------------|--------------------------------------------------------------|-------------------------------------------------------------------------------------------------------------------------------------------------------------------------------------------------------------------------------------------------------------------------------------------------------------------------------------------------------------------------------------------------------------------------------------------------------------------------------------------------------------------------------------------------------------------------------------------------------------------------------------------------------------------------------------------------------------------------------------------------|
|                      |              |                                                                                                                                                                                                                                                                                |      |                       |                                                                        |                                                              | <p>(n = 92, 71.87%), frequent waking up during sleep (n = 84, 65.62%), and frequent daytime sleepiness (n = 72, 56.25%).</p> <p>The mean GSDS was 45.0 ± 14.9 (range: 12–130). There was no difference in the mean GSDS between males and females.</p> <p>The mean subjective reported sleep duration (total daily sleep time) was 7.98 ± 1.8 h; (range 4–15 h). There was a statistically significant difference in the mean sleep duration between males (mean = 7.7 ± 1.6 h) and females (mean = 8.1 ± 1.8 h; t(366) = -2.2; p = 0.029). Approximately 33.4% (n = 123) of the participants reported taking naps during the day (mean = 1.7 ± 0.96 h/d; range: 0–5 h/d). Most participants reported poor sleep quality (n = 226, 61.41%).</p> |
| Alharbi et al., 2021 | Saudi Arabia | 3032 responses<br>The majority of respondents (64.4%) were females.                                                                                                                                                                                                            | 3032 | Cross-sectional study | The Insomnia Severity Index                                            | Sleep disorder (insomnia)                                    | <p>Respondents who are younger, reported having a diagnosed mental illness, have never been married, and students had significantly higher ISI scores than others.</p> <p>The results of the regression model indicate that the most important factors associated with insomnia severity during the COVID-19 pandemic were the level of depression and anxiety, along with the respondent's intolerance of uncertainty, history of a sleep disorder, younger age, and whether they used emotion-based coping strategies.</p>                                                                                                                                                                                                                    |
| Alharbi et al., 2021 | Saudi Arabia | 790 responses were included. The majority of participants were the Saudi population (n=735; 92.9%). Two-thirds of the participants were employed. A total of 27.5% were healthcare workers, 45.1% were enterprise or institution workers, and 27.5% were teachers or students. | 790  | Cross-sectional study | Pittsburgh sleep quality index score<br><br>Athens sleep questionnaire | Sleep quality<br>Sleep duration<br>Sleep disorder (insomnia) | <p>The overall Global PSQI was 6.67±3.82 for all participants</p> <p>The prevalence of insomnia and poor sleep quality were 54.4% and 55.5%, respectively. Saudi citizenship was associated with longer sleep duration (p=0.031).</p> <p>Female gender and being married were associated with worse global PSQI, sleep quality, sleep distribution, sleep latency, and daytime dysfunction. In terms of sleep duration, the male gender was worse than the female gender (p&lt;0.001)</p> <p>The prevalence of insomnia was 430 (54.4%). Compared to non-Saudi participants, Saudi</p>                                                                                                                                                          |

|                        |              |                                                                                                                                                                                                                                                                |     |                       |                                                                                     |                                                    |                                                                                                                                                                                                                                                                                                                                                                                                                                                                                                                                                                                                                                                                                                                |
|------------------------|--------------|----------------------------------------------------------------------------------------------------------------------------------------------------------------------------------------------------------------------------------------------------------------|-----|-----------------------|-------------------------------------------------------------------------------------|----------------------------------------------------|----------------------------------------------------------------------------------------------------------------------------------------------------------------------------------------------------------------------------------------------------------------------------------------------------------------------------------------------------------------------------------------------------------------------------------------------------------------------------------------------------------------------------------------------------------------------------------------------------------------------------------------------------------------------------------------------------------------|
|                        |              |                                                                                                                                                                                                                                                                |     |                       |                                                                                     |                                                    | participants were linked to a greater prevalence of insomnia (45.5% versus 55%)<br>the prevalence of insomnia was 61.3% in the single participants and 50.4% in the married participants.                                                                                                                                                                                                                                                                                                                                                                                                                                                                                                                      |
| Aljemaiah et al., 2020 | Saudi Arabia | 347 participants from Taif, Saudi Arabia<br>n = 213 (61.4%) males and n = 134 (38.6%) females. The mean age was 35.5 years (s.d. = 10.3 years). The age range was 12 to 63 years.                                                                              | 347 | Cross-sectional study | 4DSQ scale                                                                          | Sleep quality                                      | Sleep disruption was reported during the initial phase of the lockdown as people's quality of sleep was severely reduced.                                                                                                                                                                                                                                                                                                                                                                                                                                                                                                                                                                                      |
| Allam et al., 2021     | Egypt        | A random sample of 336 staff members employed at Menoufia University age of the participants under the study ranged from 22 to 63 years (35.34±9.0), most of them were married and from urban residence (77.1% and 69%, respectively), and 51.2% were females. | 336 | Cross-sectional study | Survey items developed by the study's author including questions on sleep problems. | Sleep duration<br>Sleep quality<br>Sleep problems  | Workaholics had higher risks than relaxed ones for sleep problems in terms of difficulty initiating sleep, difficulty maintaining sleep, and insufficient sleep (OR: 1.97, 3.39, and 2.23; respectively)                                                                                                                                                                                                                                                                                                                                                                                                                                                                                                       |
| Alnofaiey et al., 2020 | Saudi Arabia | 340 (73.6%) had an age ranging from 23–30 years, 235 (50.9%) were females, 202 (43.7%) were from Taif city, 256 (55.4%) were residents, and 18.6% had an internal medicine specialty.                                                                          | 340 | Cross-sectional study | Pittsburgh Sleep Quality Index (PSQI) scale.                                        | Sleep duration<br>Sleep quality<br>Sleep disorders | Prevalence of sleep disorders was 43.9%, doctors in the age group of 31–40 years, associate consultants had a significant higher prevalence of sleep disorders.<br>Medical interns and laboratory/pathology/microbiology doctors had a significant more difficulty in fall asleep during COVID-19, and internists and surgeons had a significant higher percent of those who used sleeping pills.<br>Resident doctors had a significant higher percent of having trouble in staying awake, and residents and consultants had a significant higher percent of those who suffered decreased sleep duration.<br>Sleep quality during COVID-19 was very good, fair good and very bad in 23.4%, 60% and 3.5% of HCW |

|                        |              |                                                                                                                                                                                                                                                   |      |                       |                                                                                                                         |                                 |                                                                                                                                                                                                                                                                                                                                                                                                                                                                                                                                                                                                                                                                                                                                                                                                                                                                                                                                                                                           |
|------------------------|--------------|---------------------------------------------------------------------------------------------------------------------------------------------------------------------------------------------------------------------------------------------------|------|-----------------------|-------------------------------------------------------------------------------------------------------------------------|---------------------------------|-------------------------------------------------------------------------------------------------------------------------------------------------------------------------------------------------------------------------------------------------------------------------------------------------------------------------------------------------------------------------------------------------------------------------------------------------------------------------------------------------------------------------------------------------------------------------------------------------------------------------------------------------------------------------------------------------------------------------------------------------------------------------------------------------------------------------------------------------------------------------------------------------------------------------------------------------------------------------------------------|
|                        |              |                                                                                                                                                                                                                                                   |      |                       |                                                                                                                         |                                 | respectively. The study observed a negative impact of COVID-19 pandemic on HCW sleep quality.                                                                                                                                                                                                                                                                                                                                                                                                                                                                                                                                                                                                                                                                                                                                                                                                                                                                                             |
| Alomari et al., 2021   | Jordan       | 1757 participants: The majority of the participants were women (69.4%), from a middle-income class (77.0%) while 51.6% held a bachelor's degree and 35.6% were unemployed.                                                                        | 1757 | Cross-sectional study | Survey items developed by the study's author including questions on sleep quality, sleep duration, and sleep disorders. | Sleep duration<br>Sleep quality | >50% (range: 53.1%–59.4%) of the participants reported an “increase” in sleep disturbance, nighttime sleeping, and total sleeping hours while 49.1% reported a “decrease” in daytime sleeping. Only age ( $\chi^2 = 20.2$ ; $p = 0.0001$ ) was associated with changes in sleeping disturbances during COVID-19 confinement. Younger age ( $\beta = -0.02$ ; OR = 0.98; $p = 0.05$ ) was associated with an “increase” in sleeping disturbance<br>Only gender ( $\chi^2 = 13.4$ ; $p = 0.001$ ) is an independent predictor of nighttime sleeping. Being a male is associated with a “decrease” ( $\beta = 0.36$ ; OR = 1.4; $p = 0.006$ ) in nighttime sleeping hours. Being a male ( $\beta = 0.34$ ; OR = 1.41; $p = 0.03$ ) and having a high school ( $\beta = -0.70$ OR = 0.50; $p = 0.007$ ), two-year ( $\beta = -0.67$ ; OR = 0.50; $p = 0.01$ ), and four-year ( $\beta = -0.46$ ; OR = 0.63; $p = 0.05$ ) diplomas are associated with a “decrease” in daytime sleeping hours. |
| Alothman et al., 2021  | Saudi Arabia | A total of 669 individuals attempted to complete the online survey, 554 participants completed at least 2 sections of the survey (82.8%), and 41.3% ( $n = 276$ ) completed the whole online survey. The majority of the sample were female (83%) |      | Cross-sectional study | Pittsburgh Sleep Quality Index                                                                                          | Sleep quality<br>Sleep duration | Most had sufficient sleep duration (7.5 hrs $\pm$ 2.1), and also reported poor sleep quality (5.4 $\pm$ 2.4)                                                                                                                                                                                                                                                                                                                                                                                                                                                                                                                                                                                                                                                                                                                                                                                                                                                                              |
| Alqahtani et al., 2021 | Saudi Arabia | 593 participants 7.7% were males, and 42.3% were females. The response from the age group of 20–30 years was 38.6%, 30.4% were between 31 and 40 years, 17% were in the                                                                           | 593  | Cross-sectional study | Pittsburgh Sleep Quality Index                                                                                          | Sleep quality<br>Sleep duration | The PSQI score (7.2) of the female respondents were higher than that of the males. The mean latency to fall asleep of the former was 42.51 (SD 31.6) min, which was longer than that of the latter.<br>Although the mean PSQI score and the sleep latency of the age group 51 years were high, the mean sleep duration was the shortest.                                                                                                                                                                                                                                                                                                                                                                                                                                                                                                                                                                                                                                                  |

|                        |              |                                                                                                                                        |     |                       |                                       |                                 |                                                                                                                                                                                                                                                                                                                                                                                                                                                                                                                                                                                                                                                                                                                                                                                                                                                                                                                                                                                                                                                                                                                                                                                                                                                                                                                                                                                                |
|------------------------|--------------|----------------------------------------------------------------------------------------------------------------------------------------|-----|-----------------------|---------------------------------------|---------------------------------|------------------------------------------------------------------------------------------------------------------------------------------------------------------------------------------------------------------------------------------------------------------------------------------------------------------------------------------------------------------------------------------------------------------------------------------------------------------------------------------------------------------------------------------------------------------------------------------------------------------------------------------------------------------------------------------------------------------------------------------------------------------------------------------------------------------------------------------------------------------------------------------------------------------------------------------------------------------------------------------------------------------------------------------------------------------------------------------------------------------------------------------------------------------------------------------------------------------------------------------------------------------------------------------------------------------------------------------------------------------------------------------------|
|                        |              | age group of 41–50 years, and 14% were 51 years. Most of the respondents were from Jazan (43.8%)                                       |     |                       |                                       |                                 | <p>The latency to fall asleep in the age groups of 41–50 years were higher, i.e., 45.13 (SD 34.3) min.</p> <p>The PSQI score and the latency to fall asleep of graduates and postgraduates were higher than those of the respondents with primary and high school education.</p> <p>The respondents with hypertension had the highest PSQI score of 8.09, followed by the subjects with asthma (7.74).</p> <p>However, the sleep duration of the subjects with hypertension was short. The subjects with asthma had the highest latency to fall asleep (55.61 SD 36.01 min) among the individuals with other comorbidities. Individuals with a family history of psychiatric disorders and sleeping pills had higher PSQI scores</p> <p>The presence of comorbidities was related to sleep duration (<math>\chi^2 = 12.13</math> [5], <math>p = 0.03</math>). Sleep duration affected males more than females (OR 1.92 [1.3–2.7], <math>p = 0.001</math>) and subjects aged 51 years (OR 2.49 [1.3–4.4], <math>p = 0.002</math>)</p> <p>Being worried/anxious of the infection significantly affected sleep latency (<math>t = 2.3</math> [591], <math>p = 0.018</math>), sleep duration (<math>t = 4.5</math> [591], <math>p = 0.001</math>), sleep efficiency (<math>t = 2.7</math> [1.0], <math>p = 0.005</math>), and PSQI score (<math>t = 2.84</math> [591], <math>p = 0.005</math>)</p> |
| AlRasheed et al., 2021 | Saudi Arabia | The study included 836 participants. The median age was 28 years, 624 (74.64%) were females, and 158 (18.90%) were healthcare workers. | 836 | Cross-sectional study | Pittsburgh Sleep Quality Index (PSQI) | Sleep quality<br>Sleep duration | Factors associated with poor sleep were recent changes in the sleep habits $p = 0.004$ , anxiety or fear because of coronavirus news on social media $p = 0.02$ , fear because there was no approved drug to treat COVID-19 $p = 0.03$ , and unaware of the presence of chronic diseases $p = 0.03$ . Female gender $p = 0.02$ , fear or anxiety because of coronavirus news on social media $p = 0.04$ , recent change in sleep habits (OR: 1.97 (1.15–3.39); $p = 0.01$ ), fear because there is no approved drug to treat COVID-19 $p = 0.001$ , monthly income <1000 SR $p = 0.01$ , and isolation $p = 0.01$ ) were                                                                                                                                                                                                                                                                                                                                                                                                                                                                                                                                                                                                                                                                                                                                                                       |



|                         |                      |                                                                                                                                                                                                                                                                                                                                                                                                                                |      |                       |                                                                                     |                                            |                                                                                                                                                                                                                                                                                                                                                                                                                    |
|-------------------------|----------------------|--------------------------------------------------------------------------------------------------------------------------------------------------------------------------------------------------------------------------------------------------------------------------------------------------------------------------------------------------------------------------------------------------------------------------------|------|-----------------------|-------------------------------------------------------------------------------------|--------------------------------------------|--------------------------------------------------------------------------------------------------------------------------------------------------------------------------------------------------------------------------------------------------------------------------------------------------------------------------------------------------------------------------------------------------------------------|
|                         |                      |                                                                                                                                                                                                                                                                                                                                                                                                                                |      |                       |                                                                                     |                                            | associated with distress. PSQI and K10 scores were significantly correlated $p < 0.001$ ).                                                                                                                                                                                                                                                                                                                         |
| AlRasheed et al., 2021  | Saudi Arabia         | The study included a total of 353 participants; 88 were in isolation because they had current or suspected COVID-19 infection or because they had just arrived from abroad, with 265 non-isolated individuals serving as controls. The age of the isolated group was $28.6 \pm 9.8$ (mean $\pm$ standard deviation) years versus $27.5 \pm 8.5$ years for the non-isolated group, with males accounting for 37% in both groups | 353  | Cross-sectional study | Pittsburgh Sleep Quality Index (PSQI)                                               | Sleep duration<br>Sleep quality            | The mean PSQI score was $8.5 \pm 3.6$ and $8.4 \pm 3.5$ for the isolated and non-isolated groups, respectively ( $P = 0.92$ ).<br>Poor sleep (PSQI $\geq 6$ ) was reported in 235 (66.6%)<br>Isolation was not associated with poor sleep (OR: 0.73 (95% CI: 0.41–1.3), $P = 0.29$ )                                                                                                                               |
| Alshumrani et al., 2022 | Saudi Arabia         | A total of 1091 participants were surveyed; 643 (58.9%) were COVID-19 patients. The mean age of the patients in the COVID-19 arm was $42.8 \pm 15.2$ years, with a male predominance of 61.1%.                                                                                                                                                                                                                                 | 1091 | Cross-sectional study | Athens Insomnia Scale                                                               | Sleep quality<br>Sleep disorder (insomnia) | The majority (58.1%) reported worsened sleep during the COVID-19 pandemic.<br>Poor sleep quality was reported in 66.1% of the patients in the COVID-19 group (mean score of $6.9 \pm 4.0$ ) and 72.8% of participants in the control group (mean score $7.6 \pm 4.3$ ). Insomnia affected 50.5% of the patients with COVID-19 (mean score of $6.5 \pm 5.5$ ) and 58.5% of controls (mean score of $7.6 \pm 5.5$ ). |
| Arafa et al., 2021      | Egypt                | 1629 participants, 48.1% were aged $\leq 30$ years, 42.4% were men, and 20.0% were working in the health sector                                                                                                                                                                                                                                                                                                                | 1629 | Cross-sectional study | Survey items developed by the study's author including questions on sleep duration. | Sleep duration                             | inadequate sleeping (less than 6hrs/ day) (23.1%)                                                                                                                                                                                                                                                                                                                                                                  |
| Badri et al., 2021      | United Arab Emirates | 574 older adults in Abu Dhabi<br>About 60% were male and 40% were female.<br>Most of them were                                                                                                                                                                                                                                                                                                                                 | 574  | Cross-Sectional study | Survey items developed by the study's author including questions on                 | Sleep disorders                            | The analysis took each of the ten psychological feelings as dependent variables, where time was treated as the only independent variable. and resulted in ten individual regression analyses. Sleeping disorders showed significance at the 0.05                                                                                                                                                                   |

|                            |                      |                                                                                                                                                                                                                                                                                |      |                           |                                                                      |                                                   |                                                                                                                                                                                                                                                                                                                                                                                                                                                    |
|----------------------------|----------------------|--------------------------------------------------------------------------------------------------------------------------------------------------------------------------------------------------------------------------------------------------------------------------------|------|---------------------------|----------------------------------------------------------------------|---------------------------------------------------|----------------------------------------------------------------------------------------------------------------------------------------------------------------------------------------------------------------------------------------------------------------------------------------------------------------------------------------------------------------------------------------------------------------------------------------------------|
|                            |                      | married (82.4%), while only (7.7%) were single. Around (3.1%) were separated, widowed, or divorced. About 40% were Emirati and 60% were non-Emiratis.                                                                                                                          |      |                           | sleep duration.                                                      |                                                   | level. The positive standardized coefficients and t-values note more negative development for sleeping for older adults, suggesting that time harms the development of the sleeping disorders.                                                                                                                                                                                                                                                     |
| Barbato et al., 2021       | United Arab Emirates | international sample of foreign workers (n = 319) resident in the United Arab Emirates (UAE). The majority of participants were female (76%), European (69%) and highly educated (83% had a bachelor's or higher degree)                                                       | 319  | Cross-sectional study     | Insomnia Severity Index                                              | Sleep disorders (insomnia)                        | Insomnia symptoms were observed in 33% of participants, with 4% of participants showing severe symptoms. A higher reported prevalence of insomnia was observed among younger participants, females, and a more severe impact of COVID-19 in the home country.                                                                                                                                                                                      |
| Başkan et al., 2021        | Turkey               | Using the snowball sampling method for sample selection, 1,909 individuals aged 18-65 years living in Turkey. 69% of the respondents was female, 48.9% was married, 68.5% had moderate income, and 43.1% was civil servant. Of the participants, 78.6% was university graduate | 1909 | descriptive type research | Pittsburgh Sleep Quality Index (PSQI)                                | Sleep quality                                     | The PSQI score was $7.78 \pm 3.46$ , and 71.6% of the participants had poor sleep quality. A significant, positive and weak relationship was found between the total scores on PSQI and PSS ( $p < 0.05$ )                                                                                                                                                                                                                                         |
| Cheikh Ismail et al., 2020 | United Arab Emirates | 1012 participants, highest number of participants residing in Abu Dhabi (33.9%) and Dubai (32.5%)<br>Females (75.9%), aged 26–35 years (29.1%), were married (56.4%), had no children (50%), completed a bachelor's                                                            | 1012 | Cross-sectional study     | Copenhagen Psychosocial Questionnaire (COPSOQ-II) with modifications | Sleep quality<br>Sleep duration<br>Sleep disorder | Significant decrease in the percentage of participants who reported sleeping less than seven hours per night from 51.7% before the pandemic to 39% during the pandemic ( $p < 0.001$ )<br>A higher percentage of participants reported poor sleep quality during the pandemic (28.1%) compared to before the pandemic (17.3) ( $p < 0.001$ ), and sleep disturbances were also more common during the pandemic (60.8%) compared to before (52.9%). |

|                            |                                                                                                                             |                                                                                                                                                                                                                                                                                                                                                                                                                                                            |      |                       |                                       |                                                   |                                                                                                                                                                                                                                                                                                                                                                                                                                                                                                                                                                                                                     |
|----------------------------|-----------------------------------------------------------------------------------------------------------------------------|------------------------------------------------------------------------------------------------------------------------------------------------------------------------------------------------------------------------------------------------------------------------------------------------------------------------------------------------------------------------------------------------------------------------------------------------------------|------|-----------------------|---------------------------------------|---------------------------------------------------|---------------------------------------------------------------------------------------------------------------------------------------------------------------------------------------------------------------------------------------------------------------------------------------------------------------------------------------------------------------------------------------------------------------------------------------------------------------------------------------------------------------------------------------------------------------------------------------------------------------------|
|                            |                                                                                                                             | degree (54.1%), worked full-time (53.3%), and were working or studying from home during quarantine (61.6%).                                                                                                                                                                                                                                                                                                                                                |      |                       |                                       |                                                   | 30.9% of the surveyed participants reported feeling lazy and less energized during the pandemic, compared to only 4.7% before the pandemic ( $p < 0.001$ )<br>Sleep disturbances increase was significantly higher in females ( $p = 0.011$ ).<br>Sleep duration and quality was most affected among participants aged 18–35 ( $p < 0.001$ ).                                                                                                                                                                                                                                                                       |
| Cheikh Ismail et al., 2021 | Bahrain, Egypt, Iraq, Jordan, Kuwait, Lebanon, Oman, Palestine, Qatar, Saudi Arabia, Syria, United Arab Emirates and Yemen. | 2970 participants from 18 countries in the MENA region<br>The largest proportion of respondents was from the United Arab Emirates (13.1 %), Jordan (11.9 %), Lebanon (11.5 %), Saudi Arabia (8.3 %) and Palestine (6.4 %).<br>28.4 % males, aged 18–25 years (29.6 %), were married (53.2 %), had no children (49.7 %), completed a university degree (48.5 %), worked full-time (44.8 %) and were working/studying from home during the lockdown (56.0 %) | 2970 | Cross-sectional study | Copenhagen Psychosocial Questionnaire | Sleep quality<br>Sleep duration<br>Sleep disorder | Although the percentage of participants who were sleeping <7 h per night decreased from 51.4 % before the pandemic to 36.6 % during the pandemic, the percentages of participants reporting poor sleep quality increased from 17.1 % before the pandemic to 29.2 % during the pandemic ( $P < 0.001$ ).<br>Moreover, a higher percentage of participants reported sleep disturbances during the pandemic (63.2 %) compared with before (53.1 %). As a result, 29.6 % of the participants reported feeling lazy and less energised during the pandemic, compared with only 4.7 % before the pandemic ( $P < 0.001$ ) |
| Cigiloglu et al., 2020     | Turkey                                                                                                                      | Of the 104 participants, 61 (58.7%) were men, and 75 (72.1%) were ages 65–74. With regard to health, 76.9% of respondents reported a history of at least one chronic disease                                                                                                                                                                                                                                                                               | 104  | Cross-sectional study | Richards-Campbell Sleep Questionnaire | Sleep quality                                     | None of the groups had a mean sleep score indicating very poor sleep quality (score: 0–25). As the monthly income and education level increased, scores for most of the sleep parameters also increased<br>Found that depression and anxiety symptoms were associated with poorer quality of life and sleep quality.                                                                                                                                                                                                                                                                                                |
| Corio et al., 2021         | Israel                                                                                                                      | 2541 participants: Israel (N = 1969) and the U.S. (N = 572)<br>Israeli sample: Age 40.4                                                                                                                                                                                                                                                                                                                                                                    | 2541 | Cross-sectional study | Pittsburgh Sleep Quality Index        | Sleep quality                                     | 56% of the sample were poor sleepers<br>A large majority of the sample (88.9%) reported that their sleeping habits had changed since the pandemic started in at least one of the 6 ways                                                                                                                                                                                                                                                                                                                                                                                                                             |

|                    |        |                                                                                                                                                                                                                                                                                                                                 |     |                       |                                |               |                                                                                                                                                                                                                                                                                                                                                                                                                                                                                                                                                                                                                                                                       |
|--------------------|--------|---------------------------------------------------------------------------------------------------------------------------------------------------------------------------------------------------------------------------------------------------------------------------------------------------------------------------------|-----|-----------------------|--------------------------------|---------------|-----------------------------------------------------------------------------------------------------------------------------------------------------------------------------------------------------------------------------------------------------------------------------------------------------------------------------------------------------------------------------------------------------------------------------------------------------------------------------------------------------------------------------------------------------------------------------------------------------------------------------------------------------------------------|
|                    |        | ± 13.76, Female 55.1% (1085)                                                                                                                                                                                                                                                                                                    |     |                       |                                |               | assessed.<br>Almost 70% of the participants reported they were going to bed later, and almost 50% reported waking up later in the morning<br>the strongest correlations were between use of sleeping medication and both depression (rs = .55, P < .001) and anxiety (rs = .57, P < .001), and between sleep disturbances and both depression (rs = .52, P < .001) and anxiety (rs = .49, P < .001).<br>Participants who reported more COVID-related stress reported significantly poorer sleep quality, with moderate effect sizes                                                                                                                                   |
| Duran et al., 2021 | Turkey | 405 participants, 70.9% of the participants were female, 29.1% were male. While 6.7% of the participants were single, 82.2% had undergraduate or higher degrees. 48.4% were continuing to work from their workplace, 15.1% were continuing to work from home, and 36.5% were not working at a job. 69.4% did not have children. | 405 | Cross-sectional study | Pittsburgh Sleep Quality Index | Sleep quality | Mean sleep quality score was 6.39 ± 3.31. The prevalence of poor sleep quality was 55.1%. The sleep quality of the single participants and the participants with low education levels was poorer. The sleep quality of those who left work in the pandemic period was poorer than those who were working from home/office and those who were already not employed before the pandemic. The sleep quality of those not working in the field of health was better than healthcare professionals and those not working at all. The scores for psychological distress were negatively correlated with sleep quality levels.                                               |
| Eren et al., 2021  | Turkey | 405 participants<br>67.9% (275) of the individuals participating in the study were women, and 34.6% (281) were under 20 years old.<br>68.4% (277) of the individuals are university graduates and high graduate, 67.2% (272) are single, 28.6% (116) have children.                                                             | 405 | Cross-sectional study | Pittsburg Sleep Quality Index  | Sleep quality | While 23% (93) of the participants had sleep problems before the COVID19 outbreak, 40% (162) had sleep problems after the COVID19 outbreak. It was determined that 183 (78.9%) participants with good sleep quality did not have sleep problems after the start of the COVID-19 outbreak, and 113 (65.3%) participants with poor sleep quality experienced sleep problems after the start of the COVID-19 outbreak.<br>As a result of an increase in the state-trait anxiety scale score by 1 point, the risk of poor sleep quality increased 1.051 times (5.1%)<br>A statistically significant relationship was found between PSQI classes and psychiatric diagnosis |

|                           |                 |                                                                                                                                                                                                                                                             |      |                       |                                                                                                                 |                           |                                                                                                                                                                                                      |
|---------------------------|-----------------|-------------------------------------------------------------------------------------------------------------------------------------------------------------------------------------------------------------------------------------------------------------|------|-----------------------|-----------------------------------------------------------------------------------------------------------------|---------------------------|------------------------------------------------------------------------------------------------------------------------------------------------------------------------------------------------------|
|                           |                 |                                                                                                                                                                                                                                                             |      |                       |                                                                                                                 |                           | status ( $\chi^2=4.416$ , $p=0.036$ ). It was found that 226 people (97.4%) with good sleep level had no psychiatric diagnosis, and 12 people (6.9%) with bad sleep level had psychiatric diagnosis. |
| Galali, 2021              | Iraqi Kurdistan | 2137 participants included 74.9% (1,600) from Erbil, 22.3% (476) from Sulaimani, and 2.9% (61) from Duhok. Regarding gender, results showed that 43.4% (927) were male and 56.4% (1,210) were female.                                                       | 2137 | Cross-sectional study | Survey items developed by previous study "EBLC-COVID19 questionnaire" Including questions on sleeping behavior. | Sleep duration            | During the pandemic, the percentage of people reporting sleeping between 7 and 9 hr per night increased from 44.8% to 53.6% and those reporting more than 9 hr sleep increased from 8.1% to 22.4%.   |
| Gokseven et al., 2021     | Israel          | 315 participants: 178 were female and 137 were male. The mean age was $71.5 \pm 5.6$ (min: 65, max: 94) years, and 26 participants were living alone.                                                                                                       | 315  | Cross-sectional study | Survey items developed by the study's author including questions on sleep disorder.                             | Sleep disorder (Insomnia) | 30.8% (n = 97) of the participants stated that they had difficulty falling asleep at night after the onset of COVID-19 infection                                                                     |
| Hadar-Shoval et al., 2021 | Israel          | 421 Participants. The sample comprised 295 women (70%), and participants had a mean age of $37.93 \pm 16.47$ years (range 18-90) and a mean education of $14.39 \pm 2.78$ years. About 53.8% (n=226) lived in urban areas and 46.2% (n=194) in rural areas. | 421  | Cross-sectional study | Pittsburgh Sleep Quality Index                                                                                  | Sleep quality             | For the entire sample, sleep disorder (insomnia), as measured by PSQI, revealed poor sleep quality (6.82; above 5 is an indication of sleep disturbances).                                           |
| Hammoudi et al., 2021     | Lebanon         | 111 (18.8%) males, 480 (81.2%) females                                                                                                                                                                                                                      | 591  | Cross-sectional       | Insomnia Severity Index                                                                                         | Insomnia levels           | Regarding phone screen times among the university students, the prevalence of insomnia, anxiety,                                                                                                     |

|                       |                                 |                                                                                                                                                                         |     |                       |                                                                                      |                |                                                                                                                                                                                                                                                                                                                                                                                   |
|-----------------------|---------------------------------|-------------------------------------------------------------------------------------------------------------------------------------------------------------------------|-----|-----------------------|--------------------------------------------------------------------------------------|----------------|-----------------------------------------------------------------------------------------------------------------------------------------------------------------------------------------------------------------------------------------------------------------------------------------------------------------------------------------------------------------------------------|
|                       |                                 |                                                                                                                                                                         |     | study                 | (ISI), Bedtime Procrastination Scale                                                 |                | depression, and overweight increased with increasing phone screen time. Female sex (adjusted odds ratio [aOR]=2.19, 95% confidence interval [CI]=1.27-3.77), overweight status (aOR=1.85, 95% CI=1.22-1.28), insomnia (aOR=1.06, 95% CI=1.02-1.10), and bedtime procrastination (aOR=1.03, 95% CI=1.00-1.07) were significant predictors of a phone screen time of $\geq 7$ hours |
| Hammouri et al., 2022 | Jordan                          | 467 participants. 297 (64%) responses from females and 170 (36%) from males. The population age was between 18 and 103 years old and the mean was 33.9 years (SD 13.1). | 467 | Cross-sectional study | Survey items developed by the study's author including questions on sleep duration.  | Sleep duration | There is a significant difference in the increase in hours of sleep, where single people (59%) increased the amount of sleep more so than married people (43.4%). The respondents who increased their sleeping hours tended to have a younger mean of age for all significant pairwise comparisons.                                                                               |
| Husain et al., 2020   | Kuwait                          | 415 adults participated in this descriptive cross-sectional study with a mean age of $38.47 \pm 12.73$ years; most of them were females, numbering 285 (68.7%).         | 415 | Cross-sectional study | Survey items developed by the study's author including questions on sleeping habits. | Sleep quality  | With regard to sleeping habits, results indicated significant statistical differences before and during the pandemic, there was a decrease in the percentage of participants who slept during the night and a marked increase in the percentage of participants who slept during the day (OR = 3.99 (95% CI 2.86–6.62), $p < 0.001$ )                                             |
| Hussien et al., 2020  | Egypt, Jordan, and Saudi Arabia | General populations of Egypt (198 participants, 40% female), Jordan (148 participants, 36% female), and Saudi Arabia (358 participants, 42% female) were recruited.     | 704 | Cross-sectional study | Survey items developed by the study's author including questions on sleep quality.   | Sleep quality  | 53.7% of the sample reported sleep disturbances. A high DASS mean score was significantly associated with reporting disturbances in sleep                                                                                                                                                                                                                                         |
| Iqbal et al., 2021    | Saudi Arabia                    | 397 questionnaires from the participants. The respondents were mostly of youth age (19-24 years), 66.5% of respondents were male, while there were 33.5%                | 397 | Cross-sectional study | Pittsburgh sleep quality index                                                       | Sleep quality  | While correlating the sleep patterns disturbance in individuals who had contact with COVID-19 patients, there was a significant sleep disturbance. The disturbance of sleep was in having problems falling sleep ( $p$ -value=0.024), having bad/horrible dreams ( $p$ -value=0.017), feeling cold at sleeping ( $p$ -                                                            |

|                             |              |                                                                                                                                                                                                                                                                             |       |                       |                                                                                                       |                                 |                                                                                                                                                                                                                                                                                                                                                                                                                                                                                                                    |
|-----------------------------|--------------|-----------------------------------------------------------------------------------------------------------------------------------------------------------------------------------------------------------------------------------------------------------------------------|-------|-----------------------|-------------------------------------------------------------------------------------------------------|---------------------------------|--------------------------------------------------------------------------------------------------------------------------------------------------------------------------------------------------------------------------------------------------------------------------------------------------------------------------------------------------------------------------------------------------------------------------------------------------------------------------------------------------------------------|
|                             |              | females. Most of the participants did not contact any COVID-19 patients (75.1%, n=298)                                                                                                                                                                                      |       |                       |                                                                                                       |                                 | value=0.038), and difficulty staying active during eating or driving (p-value=0.012).<br><br>The sleep quality is poor due to the stay-at-home order, having a disorganized working schedule, and deprived lifestyle.                                                                                                                                                                                                                                                                                              |
| Karahan Yilmaz et al., 2021 | Turkey       | A total of 1120 individuals, 412 (36.8 %) male and 708 (63.2 %) females, participated in the study. The mean age was determined as 33.04 ± 11.04. Among those who participated in the research, 84.6 % of individuals were university/bachelor's/master's degree graduates. | 1,120 | Cross-sectional study | Survey items developed by the study's author including questions on sleep quality and sleep duration. | Sleep duration<br>Sleep quality | During the pandemic period, 42.5 % of the individuals stated that they slept more and 40.2 % stated that there was no change in their sleep patterns. Daily physical activity durations were determined as 8.25 ± 1.77 h for sleep                                                                                                                                                                                                                                                                                 |
| Keng et al., 2022           | 86 countries | 67% (n = 4959) of the participants were female                                                                                                                                                                                                                              | 7,402 | Longitudinal study    | Survey                                                                                                | Question on sleep quality       | COVID-related infection risk and perceived economic burden were both negatively associated with sleep quality during the previous week. (b = 0.67, SE = 0.01, p <.001) Those who reported high economic burden (top 10%) reported decreased sleep quality regardless of levels of perceived infection risk, b = -0.02, SE = 0.02, p =.325, whereas people perceiving low economic burden (bottom 10%) reported better sleep quality if their perceived infection risk was also low, b = -0.111, SE = 0.02, p <.001 |
| Kilani et al., 2020         | MENA region  | 917 males, 37.4 ±13.4 years old and 806 females 32.2 ± 11.5 years old                                                                                                                                                                                                       | 1,723 | Cross-sectional study | Pittsburgh Sleep Quality Index (PSQI)                                                                 | Sleep quality                   | t-test analysis revealed a significant difference in mental wellbeing score based on sleep quality (t = -16.413, p < 0.001). A significant number of respondents (43%) reported poor sleep quality. Those with good sleep quality showed significantly better mental wellbeing (15.5 ± 3.4) in comparison with those with poor sleep quality (12.4 ± 4.2) (p <                                                                                                                                                     |

|                          |        |                                                                                                                                                                             |     |                       |                                       |                                                    |                                                                                                                                                                                                                                                                                                                                                                                                                                                                                                                                                                                                                                                                                                                                                                                                                                                                                                                                                                                                                                          |
|--------------------------|--------|-----------------------------------------------------------------------------------------------------------------------------------------------------------------------------|-----|-----------------------|---------------------------------------|----------------------------------------------------|------------------------------------------------------------------------------------------------------------------------------------------------------------------------------------------------------------------------------------------------------------------------------------------------------------------------------------------------------------------------------------------------------------------------------------------------------------------------------------------------------------------------------------------------------------------------------------------------------------------------------------------------------------------------------------------------------------------------------------------------------------------------------------------------------------------------------------------------------------------------------------------------------------------------------------------------------------------------------------------------------------------------------------------|
|                          |        |                                                                                                                                                                             |     |                       |                                       |                                                    | .001)                                                                                                                                                                                                                                                                                                                                                                                                                                                                                                                                                                                                                                                                                                                                                                                                                                                                                                                                                                                                                                    |
| Kolokotroni et al., 2021 | Cyprus | Out of 745 participants (sample of adults who resided in Cyprus during the Spring 2020 lockdown), 74% were female and median age was 39 years.                              | 745 | Cross-sectional study | Pittsburgh Sleep Quality Index        | Sleep quality                                      | <p>Overall participants reported significantly worse sleep quality score (4 v 5, <math>p &lt; 0.01</math>) during lockdown.</p> <p>Regarding the individual PSQI score components (sleep latency, daytime dysfunction, sleep medication and sleep quality), all increased during lockdown (<math>p &lt; 0.01</math>), demonstrating a worse sleep experience, except sleep efficiency, which marginally improved during lockdown (<math>p &lt; 0.01</math>).</p> <p>a positive moderate correlation (<math>r = 0.4064</math>, <math>p &lt; 0.01</math>) between differences in perceived stress and sleep quality index before and during lockdown, indicating that an increase in perceived stress was associated with worsening sleep quality.</p> <p>Overall support index score difference was negatively correlated with sleep quality index difference (<math>r = -0.2253</math>, <math>p &lt; 0.01</math>), showing that a decrease in the overall support index during lockdown was associated with worsening sleep quality.</p> |
| Korkmaz et al., 2020     | Turkey | 61 (44%) females and 79 (56%) males participants<br>The average age for female participants was $30.7 \pm 6.2$ and the average age for male participants was $35.6 \pm 8.7$ | 140 | Cross-sectional study | Pittsburgh Sleep Quality Index (PSQI) | Sleep quality                                      | There was a positive correlation between the Beck Anxiety Inventory (BAI) scores and the PSQI and Problem Solving Inventory (PSI) scores of the participants and a negative correlation between the World Health Organization Quality of Life-BREF (WHOQOL-BREF) scores and the PSQI and PSI scores of the participants ( $p = 0.000$ , $r = 0,508$ ; $p = 0.029$ , $r = 0,184$ ; $p = 0.000$ , $r = -0,360$ )                                                                                                                                                                                                                                                                                                                                                                                                                                                                                                                                                                                                                           |
| Lan et al., 2021         | Israel | Studied the effects of lockdown in three cohorts: (1) 169 individuals from the general population; (2) 91 undergraduate students and (3) 39 women within fertility age.     | 299 | Cohort study          | Sleep logs<br>Online questionnaire    | Sleep duration<br>Sleep quality<br>Sleep disorders | <p>In cohort (1) lockdown resulted in increased sleep duration (<math>p &lt; 0.001</math>), and delayed midsleep point during workdays (<math>p = 0.07</math>) and weekends (<math>p = 0.02</math>) largest change in sleep duration was shown in young people with late chronotype (<math>p = 0.04</math>) and older subjects with early chronotype (<math>p = 0.04</math>).</p> <p>In cohort (2), There were effects of lockdown</p>                                                                                                                                                                                                                                                                                                                                                                                                                                                                                                                                                                                                   |



|                      |              |                                                                                                                                                                                 |       |                       |                                                                                     |                           |                                                                                                                                                                                                                                                                                                                                                                                                        |
|----------------------|--------------|---------------------------------------------------------------------------------------------------------------------------------------------------------------------------------|-------|-----------------------|-------------------------------------------------------------------------------------|---------------------------|--------------------------------------------------------------------------------------------------------------------------------------------------------------------------------------------------------------------------------------------------------------------------------------------------------------------------------------------------------------------------------------------------------|
|                      |              |                                                                                                                                                                                 |       |                       |                                                                                     |                           | (p=0.02) and chronotype (p=0.05) on sleep duration. Increased sleep during lockdown and in early chronotypes. Females slept more during lockdown (p=0.01) and students who work slept less (p=0.02). Midsleep point free days (MSF) was delayed during lockdown (p=0.001) with MSF of late chronotypes later than MSF of early chronotypes (p<0.001).                                                  |
| Lin et al., 2020     | Iran         | A sample of Iranian young adults (n = 1078 with 628 males; mean age = 26.24 years [SD ± 7.41])                                                                                  | 1078  | Cross-sectional study | Insomnia Severity Index                                                             | Sleep disorder (insomnia) | Insomnia was mutually and significantly correlated with psychological distress, problematic social media use, fear of COVID-19, COVID-19 misunderstanding.<br><br>Problematic social media use was significantly associated with insomnia via both direct (B = 0.095; SE = 0.038) and indirect paths.                                                                                                  |
| Lin et al., 2020     | 19 countries | N/A                                                                                                                                                                             | N /A  | Longitudinal study    | Google trends                                                                       | Sleep disorder (insomnia) | The countries with the greatest increases in searches for insomnia were Iran, Spain, the United States, and Italy; these countries exhibited a significant increase in insomnia searches on more than 10 of the 31 days observed. The number of COVID-19–related deaths was positively correlated to the number of days with an increase in searches for insomnia in the 19 countries (p=0.64, P=.003) |
| Lin et al., 2022     | Iran         | Sample of 10,843 participants (mean age = 35.54 years; SD = 12.00), 6751 were females (62.3%)                                                                                   | 10843 | Cross-sectional study | Insomnia Severity Index                                                             | Sleep disorder (insomnia) | Suicidal ideation was positively and significantly correlated with insomnia (r = 0.327; p < 0.001) Generalized trust was negatively and significantly correlated with insomnia (r = -0.100; p < 0.001) insomnia and fear of COVID-19 were positively and significantly correlated (r = 0.271; p < 0.001).                                                                                              |
| Maatouk et al., 2022 | Lebanon      | 948 participants, divided into four groups: non-smokers not at risk (NSNR), non-smokers at risk (NSR), smokers not at risk (SNR), and smokers at risk (SR). A person at risk is | 948   | Cross-sectional study | Survey items developed by the study's author including questions on sleep duration. | Sleep duration            | NSNR significantly increased their sleep duration by 64.284 min per night (p < .001)<br><br>SNR increased their sleep duration by 54.732 min per night (p < .001)                                                                                                                                                                                                                                      |

|                      |                        |                                                                                                                                                                                                                                                                                                                            |     |                       |                                       |                                    |                                                                                                                                                                                                                                                                                                                                                                                                                                                                                                                                                                                                                                                                                                                   |
|----------------------|------------------------|----------------------------------------------------------------------------------------------------------------------------------------------------------------------------------------------------------------------------------------------------------------------------------------------------------------------------|-----|-----------------------|---------------------------------------|------------------------------------|-------------------------------------------------------------------------------------------------------------------------------------------------------------------------------------------------------------------------------------------------------------------------------------------------------------------------------------------------------------------------------------------------------------------------------------------------------------------------------------------------------------------------------------------------------------------------------------------------------------------------------------------------------------------------------------------------------------------|
|                      |                        | <p>an individual with a disease that could worsen the prognosis of a potential COVID-19 infection.</p> <p>Age mean: NSNR (26.52 years, standard deviation = 10.051), NSR (33.26 years, standard deviation = 15.672), SNR (29.55 years, standard deviation = 11.314), and SR (34.39 years, standard deviation = 12.193)</p> |     |                       |                                       |                                    |                                                                                                                                                                                                                                                                                                                                                                                                                                                                                                                                                                                                                                                                                                                   |
| Mahamid et al., 2021 | West bank of Palestine | 129 males and 237 females                                                                                                                                                                                                                                                                                                  | 366 | Cross-sectional study | DSM-5 Level 2—Sleep Disturbance Scale | Sleep disorder( sleep disturbance) | Problematic internet use positively correlated with sleep disturbance ( $r = .19, p < .01$ ), and negatively correlated with life satisfaction ( $r = -.17, p < .01$ ). Moreover, life satisfaction negatively correlated to sleep disturbance ( $r = -.25, p < .01$ ). Sleep disturbance explained statistically and significantly variance in problematic internet use ( $B = .16, SE = .04, \beta = .20$ )                                                                                                                                                                                                                                                                                                     |
| Masoumi et al., 2021 | Iran                   | Mean (SD) age was 28.8 (5.9) years. 119 females (60%)                                                                                                                                                                                                                                                                      | 200 | Cross-sectional study | Mini-Sleep Questionnaire              | Sleep duration and sleep quality   | Sleep quality was 30%, worse in the pandemic period compared to the pre-pandemic states, The mean time to go to bed and wake-up time on weekdays in the pandemic were 35 and 24 min later than those in the pre-pandemic period respectively. The mean time to go to bed and wake-up time on weekends in the pandemic were 21 and 6 min later than those pre-pandemics. Before the pandemic, subjects went to bed on weekends 40 min later than on weekdays ( $p < 0.0001$ ). In the pandemic, this difference decreased to 26 min ( $p < 0.0001$ ). In both the pre-pandemic and pandemic periods, subjects woke up 96 min later on weekends compared to the weekdays ( $p < 0.0001$ ). Before the pandemic, the |

|                               |      |                                                                                                                                                                                                                                              |     |                       |                                                                                     |                           |                                                                                                                                                                                                                                                                                                                                                                                                                                                                                                                                                                                                                                                                                                                                                           |
|-------------------------------|------|----------------------------------------------------------------------------------------------------------------------------------------------------------------------------------------------------------------------------------------------|-----|-----------------------|-------------------------------------------------------------------------------------|---------------------------|-----------------------------------------------------------------------------------------------------------------------------------------------------------------------------------------------------------------------------------------------------------------------------------------------------------------------------------------------------------------------------------------------------------------------------------------------------------------------------------------------------------------------------------------------------------------------------------------------------------------------------------------------------------------------------------------------------------------------------------------------------------|
|                               |      |                                                                                                                                                                                                                                              |     |                       |                                                                                     |                           | mean sleep duration every night was 7 h and 22 min for the weekdays, which decreased to 6 h and 44 min during the pandemic. The difference signified a 38 min sleep debt every night. The night sleep duration on weekdays before the pandemic was 33 min shorter than the night sleep duration on weekends (p <0.0001). This difference decreased to 2 min during the pandemic.                                                                                                                                                                                                                                                                                                                                                                          |
| Najafipour et al., 2021       | Iran | Of 911 participants, 365 (40.1%) were men. Almost half of the participants (51.7%) aged over 55 years. Married people accounted for 80.4% of the samples, 72.7% were illiterate or have non-university education, and 67.6% were unemployed. | 911 | Cross-sectional study | Survey items developed by the study's author including questions on sleep duration. | Sleep duration            | 42.8% and 58.8% experienced sleep time abnormality before and after the quarantine, respectively<br>A high percentage of people experienced an increase in sleep hours (33.7%)<br><br>The odds of an increase in sleep hours was higher in men and young people and lower in people with intense PA and higher levels of anxiety. The changes in the three variables were mostly related to the quarantine, although interaction between PA and sleep was also present.<br><br>There was a negative relationship between anxiety and sleep hours and between PA and sleep hours both before and after quarantine.                                                                                                                                         |
| Nakhostin-Ansari et al., 2021 | Iran | 675 people with a mean age of 40.28 years (SD=11.15) participated in the study. One-hundred and ninety-six (29%) were male, and 479 (71%) were female.                                                                                       | 675 | Cross-sectional study | Insomnia Severity Index                                                             | Sleep disorder (insomnia) | Three hundred and forty-two participants (50.7%) had subthreshold insomnia, 275 (40.7%) participants had moderate insomnia, and 58 participants (8.6%) had severe insomnia. Six-hundred and seventeen participants (91.4%) had DIS, 585 participants (86.7%) had DMS, and 520 participants (77%) suffered from EMA. The prevalence of these disorders was significantly different from each other (P<0.05), and DIS was the most common insomnia pattern.<br>fear of COVID-19 was a risk factor for all patterns of insomnia (OR=1.19, 1.12, 1.02 for DMS, DIS, and EMA, respectively). Age was a risk factor for EMA (OR= 1.09), but it was a protective factor for DMS (OR=0.98). Self-employment was a risk factor for DMS (OR=1.61) and DIS (OR=1.59) |

|                       |                      |                                                                                                                                                                                                                                                                                 |      |                       |                                                                                     |                                                    |                                                                                                                                                                                                                                                                                                                                                                                                                                                                                              |
|-----------------------|----------------------|---------------------------------------------------------------------------------------------------------------------------------------------------------------------------------------------------------------------------------------------------------------------------------|------|-----------------------|-------------------------------------------------------------------------------------|----------------------------------------------------|----------------------------------------------------------------------------------------------------------------------------------------------------------------------------------------------------------------------------------------------------------------------------------------------------------------------------------------------------------------------------------------------------------------------------------------------------------------------------------------------|
|                       |                      |                                                                                                                                                                                                                                                                                 |      |                       |                                                                                     |                                                    | Conclusion: Fear of COVID-19 is a major contributing factor to insomnia patterns. Investigation of COVID-19 fear in people with insomnia and the addition of attributed relieving or management strategies to conventional management of insomnia are reasonable approaches to improve the sleep condition of people in the pandemic.                                                                                                                                                        |
| Okudan et al., 2021   | Turkey               | 37.88±12.44 years age, 346 (68.5%) females and 159 (1.5%) males                                                                                                                                                                                                                 | 505  | Cross-sectional study | Online survey                                                                       | Quality of life (WHO Quality Of Life)-Bref version | 27.5% (N.=142) informed that even they sleep enough time, wake up tired, while 22.1% (N.=114) cannot sleep enough time, and wake up tired.                                                                                                                                                                                                                                                                                                                                                   |
| Oved et al., 2021     | Israel               | Out of the 169 participants, 94 (55.62%) were women, and 75 (44.38%) were men. The age of the participants ranged between 20 and 80, with clear two main age groups: 20–40 and 60–80.                                                                                           | 169  | longitudinal study    | Smartwatch data collection                                                          | Sleep duration<br>Sleep quality                    | An increase was observed in sleep duration based on questionnaire responses (an average of 6.28 h versus 6.42 h, $p < 0.01$ , Cohen's $d = 0.14$ ) and based on smartwatch records (an average of 7.03 h versus 7.12 h, $p = 0.05$ , Cohen's $d = 0.14$ ), MSF (an average hour of 4.03 versus 4.12, $p = 0.02$ , Cohen's $d = 0.13$ ) and MSW (an average hour of 3.43 versus 3.49, $p = 0.07$ , Cohen's $d = 0.08$ ). No significant effects were found for stress, sleep quality and SJL. |
| Radwan et al., 2021   | United Arab Emirates | 2060 responses. Three-quarters (75.1%) were females, 31.7% were between 18 and 30 years old, 38.4% were between 31 and 40 years old, and 29.9% were older than 40 years. Over half of the study population (63.8%) were married and the majority had a university degree (76%). | 2060 | Cross-sectional study | Survey items developed by the study's author including questions on sleep duration. | Sleep duration                                     | Decreased sleep was reported by 20.8%. In terms of sleeping behavior, females were more likely to experience decreased sleep compared to males, whereas older adults (>40 years old vs. 18–30 years old) were less likely to experience decreased sleep during the lockdown.                                                                                                                                                                                                                 |
| Romdhani et al., 2021 | 49 countries         | athletes (mean age: 25.1 (range 18-61) years, 1764 female (45%), 2427 team-sport (63%) and                                                                                                                                                                                      | 3911 | Cross-sectional study | Pittsburgh Sleep Quality Index (PSQI) and Insomnia                                  | Sleep quality, Sleep disorder (insomnia)           | PSQI ( $4.3 \pm 2.4$ to $5.8 \pm 3.1$ ) and ISI ( $4.8 \pm 4.7$ to $7.2 \pm 6.4$ ) scores increased from pre- to during lockdown ( $p < 0.001$ ). PSQI was predominantly influenced by sleep-onset latency ( $p < 0.001$ ; + 29.8%), sleep                                                                                                                                                                                                                                                   |

|                                   |      |                                                                         |      |                       |                                                                                                             |                                                                                                                   |                                                                                                                                                                                                                                                                                                                                                                                                                                                                                                                                                                                                                                                                                                                                                                                                                                                                                                                                            |
|-----------------------------------|------|-------------------------------------------------------------------------|------|-----------------------|-------------------------------------------------------------------------------------------------------------|-------------------------------------------------------------------------------------------------------------------|--------------------------------------------------------------------------------------------------------------------------------------------------------------------------------------------------------------------------------------------------------------------------------------------------------------------------------------------------------------------------------------------------------------------------------------------------------------------------------------------------------------------------------------------------------------------------------------------------------------------------------------------------------------------------------------------------------------------------------------------------------------------------------------------------------------------------------------------------------------------------------------------------------------------------------------------|
|                                   |      | 1442 elite (37%) athletes                                               |      |                       | Severity Index (ISI)                                                                                        |                                                                                                                   | <p>efficiency (<math>p &lt; 0.001</math>; - 21.1%), and total sleep time (<math>p &lt; 0.001</math>; - 20.1%), while ISI was affected by sleep-onset latency (<math>p &lt; 0.001</math>; + 21.4%), bedtime (<math>p &lt; 0.001</math>; + 9.4%), and eating after midnight (<math>p &lt; 0.001</math>; + 9.1%)</p> <p>Athletes went to bed (+ 75 min; 5.4%; <math>d = 1.14</math>) and woke up (+ 150 min; 34.5%; <math>d = 1.71</math>) later during lockdown with an increased total sleep time (+ 48 min; 10.6%; <math>d = 0.83</math>). Lockdown-mediated circadian disruption had more deleterious effects on the sleep quality of individual-sport athletes compared with team-sport athletes (<math>p &lt; 0.001</math>; <math>d = 0.41</math>), elite compared with non-elite athletes (<math>p = 0.028</math>; <math>d = 0.44</math>) and older compared with younger (<math>p = 0.008</math>; <math>d = 0.46</math>) athletes</p> |
| Sadeghniaat-Haghighi et al., 2021 | Iran | 1,223 participants [827 (67.6%) female, mean age=39.82±10.75 years old] | 1223 | Cross-sectional study | Insomnia Severity Index                                                                                     | Sleep disorder (insomnia)                                                                                         | <p>675 (55.2% [95%CI=52.40-57.98]) were categorized into the insomnia group. Insomnia was more prevalent in females (<math>p=0.006</math>), participants with 50 years old or higher (<math>p=0.04</math>), or high fear of COVID-19 (<math>p&lt;0.0001</math>). Totally, 67.4%, 66.4%, and 55% of all participants had DIS, DMS, and EMA, respectively, in the current outbreak. Besides, 79% had impaired daily functioning, 51.6% had impaired quality of life, and 62% were worried about their sleep problem. Notably that a considerable percentage of individuals with normal ISI scores had at least one insomnia phenotype or impaired daily functioning and quality of life. Further analyses revealed a significant increasing trend in all four insomnia phenotypes prevalence with an increase in fear of COVID-19 (all <math>p</math>-values&lt;0.0001).</p>                                                                 |
| Salehinejad et al., 2020          | Iran | Healthy volunteers 137 females, mean age = 25.79 ± 7.31                 | 160  | Cross-sectional study | Pittsburgh Sleep Quality Index (PSQI), Quantitative sleep parameters, Morningness-Eveningness Questionnaire | PSQI: sleep quality, Quantitative Sleep parameters: about time to go to bed (clock), sleep onset latency time (in | <p>PSQI: significant decrease of global sleep quality during quarantine (<math>t = 6.95</math>, <math>p &lt; 0.001</math>). t-test showed that the time to fall asleep was prolonged during home quarantine as compared to the time before quarantine (<math>t= 7.32</math>, <math>p &lt; 0.001</math>). The average sleep duration (in h) was significantly longer during quarantine, as compared to before quarantine as well (<math>t = -3.65</math>, <math>p &lt; 0.001</math>). 85.6 % of the participants (137</p>                                                                                                                                                                                                                                                                                                                                                                                                                   |

|                     |        |                                                                                                                                                                                                                                                                                                  |     |                       |                                                                                     |                                                                                                                  |                                                                                                                                                                                                                                                                                                                                                                                                                           |
|---------------------|--------|--------------------------------------------------------------------------------------------------------------------------------------------------------------------------------------------------------------------------------------------------------------------------------------------------|-----|-----------------------|-------------------------------------------------------------------------------------|------------------------------------------------------------------------------------------------------------------|---------------------------------------------------------------------------------------------------------------------------------------------------------------------------------------------------------------------------------------------------------------------------------------------------------------------------------------------------------------------------------------------------------------------------|
|                     |        |                                                                                                                                                                                                                                                                                                  |     |                       |                                                                                     | minutes), time to get up in the morning, and sleep duration<br>Morningness-eveningness questionnaire: chronotype | of 160) reported at least 1 h delay to get up in the morning on average in home quarantine. The average delay to get up in the morning during home quarantine was 2.28 h. Results showed that participants' time to get up in the morning was significantly delayed during quarantine ( $t= 15.36$ , $p < 0.001$ )                                                                                                        |
| Salman et al., 2021 | Kuwait | Data from 679 respondents (57.9% females and 42.1% males; 67.7% Kuwaiti nationals and 32.3% non-Kuwaiti nationals)                                                                                                                                                                               | 679 | Cross-sectional study | Survey items developed by the study's author include questions on quality of sleep. | Sleep quality                                                                                                    | Mental health was highly correlated with the quality of sleep<br><br>Extremely severe depression was associated with having poor or very poor quality of sleep (1.75 times).<br><br>Severe or extremely severe psychological distress was associated with having poor or very poor quality of sleep (2.20 times)                                                                                                          |
| Salman et al., 2021 | Kuwait | Among 679 respondents, 57.9% were female and 67.7% were Kuwaitis. Age group categories were represented relatively evenly, with 28.7% of respondents in their 20s, 29.3% in their 30s, 23.0% in their 40s, and 19.0% in the age range of 50 years or above. The average age was 37.7 (SD: 11.6). | 679 | Cross-sectional study | Survey items developed by the study's author include questions on quality of sleep. | Sleep quality                                                                                                    | 36.4% of respondents rated their quality of sleep as 'poor' or 'very poor'. Days of physical activity were positively correlated with 'quality of sleep'<br><br>Sleep hours were positively correlated with good quality of sleep. Quality of sleep was negatively correlated with 'consumption of sugary drinks' and 'consumption of sweets and snacks', and positively correlated with 'the days of physical activity'. |
| Savci et al., 2021  | Turkey | The final sample consisted of the remaining 103 older adults residing in a nursing home affiliated with the Istanbul Darulaceze Directorate of Hospice.                                                                                                                                          | 103 | Correlational study   | Survey items developed by the study's author include questions on sleep patterns.   | Sleep quality                                                                                                    | 18.4% of the participants had change in sleep patterns during the pandemic.                                                                                                                                                                                                                                                                                                                                               |

|                             |              |                                                                                                                                                                                                                                                                                   |      |                       |                                                                                                     |                                 |                                                                                                                                                                                                                                                                                                                                                                                                                                            |
|-----------------------------|--------------|-----------------------------------------------------------------------------------------------------------------------------------------------------------------------------------------------------------------------------------------------------------------------------------|------|-----------------------|-----------------------------------------------------------------------------------------------------|---------------------------------|--------------------------------------------------------------------------------------------------------------------------------------------------------------------------------------------------------------------------------------------------------------------------------------------------------------------------------------------------------------------------------------------------------------------------------------------|
|                             |              | The inclusion criteria for the study were as follows: be over 65 years old, voluntarily agree to participate in the study, have a Standardized Mini Mental Test Score of 24 or higher, residence within the nursing home for at least one year, and speak and understand Turkish. |      |                       |                                                                                                     |                                 |                                                                                                                                                                                                                                                                                                                                                                                                                                            |
| Şentürk et al., 2021        | Turkey       | 254 (55.3%) males and 205 (44.7%) females. The age of the participants ranged from 24 to 60 years (M=35.64, SD=6.84) and mean age was 35.64±6.84                                                                                                                                  | 459  | Cross-sectional study | Jenkins Sleep Scale (JSS)                                                                           | Subjective sleep quality        | Poor sleep quality is a predictor of depression ( $\beta=0.378$ , $p<0.001$ ), of anxiety ( $\beta=0.373$ , $p<0.001$ ) and stress ( $\beta=0.324$ , $p<0.001$ )                                                                                                                                                                                                                                                                           |
| Sultan et al., 2021         | Saudi Arabia | Three hundred thirty-eight individuals responded to the survey. Participants were 267 females (79%) and 71 males (21%) with a median age of 40 which ranged from 30 to 44 years.                                                                                                  | 338  | Cross-sectional study | Survey items developed by the study's author include questions on sleep duration and sleep quality. | Sleep duration<br>Sleep quality | The percentage of participants who used to sleep more than nine hours daily increased significantly during the pandemic from 8.3% to 21.8% ( $p<0.001$ ). Use of sleeping aids increased from 11.6% to 15.7% ( $p<0.001$ ), with 7.7% of participants having difficulty falling asleep for more than two hours. Moreover 41.8% did not feel relaxed after getting up from sleep during the pandemic compared to 14.2% before ( $p<0.001$ ) |
| Toprak Celenay et al., 2020 | Turkey       | 375 individuals in the Stay at home group and 311 individuals in the Continued to work group were included in data analysis.                                                                                                                                                      | 686  | Cross-sectional study | Jenkins Sleep Scale                                                                                 | Sleep quality                   | JSS-T scores revealed sleep quality was similar in both groups ( $p > .05$ )                                                                                                                                                                                                                                                                                                                                                               |
| Torkian et al., 2021        | Iran         | 3,446 people completed the questionnaire. most participants were female (66.7%), mean ( $\pm$ SD) age of the                                                                                                                                                                      | 3446 | Cross-sectional study | Pittsburgh Sleep Quality Index                                                                      | Sleep quality                   | 73.5% had poor sleep quality. Perceived income, hours spent outdoors, the number of people with COVID-19 that were acquainted with, and a history of depression were significantly related to sleep quality.                                                                                                                                                                                                                               |

|                     |         |                                                                                                                                                                                                                                                                                                               |      |                       |                                                                                   |                                 |                                                                                                                                                                                                                                                                                                                                                                                                                                                                                                                                                                                                                                                                                                      |
|---------------------|---------|---------------------------------------------------------------------------------------------------------------------------------------------------------------------------------------------------------------------------------------------------------------------------------------------------------------|------|-----------------------|-----------------------------------------------------------------------------------|---------------------------------|------------------------------------------------------------------------------------------------------------------------------------------------------------------------------------------------------------------------------------------------------------------------------------------------------------------------------------------------------------------------------------------------------------------------------------------------------------------------------------------------------------------------------------------------------------------------------------------------------------------------------------------------------------------------------------------------------|
|                     |         | participants was 34.2 ( $\pm 11.60$ ) years. 65% were married.                                                                                                                                                                                                                                                |      |                       |                                                                                   |                                 |                                                                                                                                                                                                                                                                                                                                                                                                                                                                                                                                                                                                                                                                                                      |
| Yalcin et al., 2022 | Turkey  | A sample of 8,276 volunteers, aged between 18 and 65, were recruited via an online platform. The mean age of the sample was 39.86 ( $\pm 13.13$ ). Approximately half of the sample were females (47.33%). Majority of volunteers were married (67.85%).                                                      | 8276 | Cross-sectional study | Pittsburgh Sleep Quality Index                                                    | Sleep quality                   | 46.38% of the sample were poor sleepers as indexed by the PSQI<br><br>The PHAM showed that the perceived vulnerability to diseases was significantly associated with poor sleep quality ( $\beta = 0.175$ , $p < 0.001$ )<br><br>Negative affectivity as indexed by DASS-21 was significantly tied to poor sleep quality ( $\beta = 0.188$ , $p < 0.001$ )                                                                                                                                                                                                                                                                                                                                           |
| Yilmaz et al., 2021 | Turkey  | A total of 1120 individuals, 412 (36.8 %) male and 708 (63.2 %) females, participated in the study. The mean age was determined as 33.04 $\pm 11.04$ .                                                                                                                                                        | 1120 | Cross-sectional study | Survey items developed by the study's author include questions on sleep patterns. | Sleep duration<br>Sleep quality | During the pandemic period, 42.5 % of the individuals stated that they slept more and 40.2 % stated that there was no change in their sleep patterns. Daily physical activity durations were determined as 8.25 $\pm 1.77$ h for sleep.                                                                                                                                                                                                                                                                                                                                                                                                                                                              |
| Younes et al., 2021 | Lebanon | A total of 4397 respondents. Included participants from all Lebanese districts, of whom 2924 (66.5%) were females, and those who received university education were 3664 (83.3%). The recruited participants were young adults between 18–35 years old, among which 3439 (78.2%) aged between 18 and 25 years | 4397 | Cross-sectional study | Insomnia Severity Index                                                           | Sleep disorder (insomnia)       | A considerable proportion of participants had symptoms of insomnia (941 [21.4%]).<br><br>The median IQR scores on the the ISI for insomnia for all respondents was 10 (5–14).<br><br>Higher perceived likelihood of contracting COVID-19 (aOR = 0.67, 95% CI: 0.56; 0.79) resulted in no clinical or subthreshold insomnia.<br><br>Single marital status (aOR = 1.43, 95% CI: 1.05; 1.93), divorced marital status (aOR = 3.33, 95% CI: 1.50; 7.39), university education (aOR = 2.50, 95% CI: 1.51; 4.16), consumption of caffeinated beverages (aOR = 1.24, 95% CI: 1.03; 1.49) and energy drinks (aOR = 1.22, 95% CI: 1.02; 1.47) were significantly associated with moderate to severe insomnia. |



1  
2  
3  
4  
5  
6  
7  
8  
9  
10  
11  
12  
13  
14  
15  
16  
17  
18  
19  
20  
21  
22  
23  
24  
25  
26  
27  
28  
29  
30  
31  
32  
33  
34  
35  
36  
37  
38  
39  
40  
41  
42  
43  
44  
45  
46  
47

|                              |        |                                                                                                  |      |                       |                                                                                     |                 |                                                                                                                                                                                                                                                                                                                                                                                                                                                                                                                                                                                                                                                                                                                                                                                                                                             |
|------------------------------|--------|--------------------------------------------------------------------------------------------------|------|-----------------------|-------------------------------------------------------------------------------------|-----------------|---------------------------------------------------------------------------------------------------------------------------------------------------------------------------------------------------------------------------------------------------------------------------------------------------------------------------------------------------------------------------------------------------------------------------------------------------------------------------------------------------------------------------------------------------------------------------------------------------------------------------------------------------------------------------------------------------------------------------------------------------------------------------------------------------------------------------------------------|
|                              |        |                                                                                                  |      |                       |                                                                                     |                 | <p>Age group of 25–35 years was significantly associated with less insomnia scores (aOR = 0.77, 95% CI: 0.62-0.96) as compared to lower age group of 18–25 years. However, cigarette smoking was significantly associated with higher insomnia (aOR = 1.53, 95% CI: 1.25; 1.88) scores.</p> <p>physical activity of more than 3 times per week during lockdown were significantly associated with less insomnia (aOR = 0.65, 95% CI: 0.52; 0.83)</p> <p>Being a non-Lebanese was significantly associated with insomnia (aOR = 1.42, 95% CI: 1.12; 1.81)</p> <p>Drinking 2L of water or more during lockdown was significantly associated with lower insomnia (aOR = 0.76, 95% CI: 0.65; 0.88)</p> <p>No change in body weight status during lockdown was significantly associated with lower insomnia (aOR = 0.71, 95% CI: 0.58; 0.86)</p> |
| Yurumez Korkmaz et al., 2021 | Turkey | Participants (n = 136; 82 females, 60.3%) had a mean age of 73.4 ± 5.9 years. (Geriatric sample) | 136  | Cross-sectional study | Survey items developed by the study's author including questions on sleep problems. | Sleep disorders | <p>Sleep problems (P = 0.000) were more common in participants with depression and anxiety.</p> <p>Sleep problems were present in one third of our study population, and found to be statistically significantly higher among patients with depression and anxiety. Sleep problems, which may be a component of psychological distress, have been found to be common in elderly people due to social isolation.<sup>32</sup> Also, restricted physical activities and concerns about COVID-19 may lead to sleep disorders.</p>                                                                                                                                                                                                                                                                                                              |
| Zach et al., 2021            | Israel | Participants were 1202 people, 381 males and 821 females, aged 45–90.                            | 1202 | Cross-sectional study | Survey items developed by the study's author including questions on sleep duration. | Sleep duration  | <p>During the time of lockdown sleeping hours increased.</p> <p>Among the younger participants, a positive relationship was found between physical activity and the number of sleeping hours, while in the older ones a positive relationship was found between inactivity and the duration of sleep.</p>                                                                                                                                                                                                                                                                                                                                                                                                                                                                                                                                   |

| Healthcare workers      |                     |                                                                                                                                                                                                                                                                                                           |             |                       |                                                                                     |                      |                                                                                                                                                                                                                                                                                                                                                                                                                                                                                                                                                                                                                                                        |
|-------------------------|---------------------|-----------------------------------------------------------------------------------------------------------------------------------------------------------------------------------------------------------------------------------------------------------------------------------------------------------|-------------|-----------------------|-------------------------------------------------------------------------------------|----------------------|--------------------------------------------------------------------------------------------------------------------------------------------------------------------------------------------------------------------------------------------------------------------------------------------------------------------------------------------------------------------------------------------------------------------------------------------------------------------------------------------------------------------------------------------------------------------------------------------------------------------------------------------------------|
| Reference               | Location of Study   | Population                                                                                                                                                                                                                                                                                                | Sample Size | Study Design          | Sleep Health Measurement Tool                                                       | Sleep Health Domains | Main Findings                                                                                                                                                                                                                                                                                                                                                                                                                                                                                                                                                                                                                                          |
| Aarafa et al., 2021     | Egypt, Saudi Arabia | This study included 426 HCWs (275 from Egypt and 151 from Saudi Arabia) distributed as follows: 206 (48.4%) physicians, 103 (24.2%) nurses, and 117 (27.4%) other HCWs. Of them, 47.2% were aged $\leq 30$ years, 50.2% were men, 65% were living with children, and 51.6% were living with older adults. | 426         | Cross-sectional study | Survey items developed by the study's author including questions on sleep duration. | Sleep duration       | 37.3% had inadequate sleeping (<6 h/day). Female sex, age $\leq 30$ years, working in Egypt, attending emergency and night shifts, watching/reading COVID-19 news $\geq 2$ h/day, and not getting emotional support from family, society, and hospital were associated with a high likelihood of inadequate sleeping.                                                                                                                                                                                                                                                                                                                                  |
| Abbas et al., 2021      | Kuwait              | 217 HCWs at Kuwait MOH hospitals completed the survey with mean ( $\pm$ standard deviation) age of 35.8 ( $\pm 7.3$ ) years; 56.2% were male                                                                                                                                                              | 217         | Cross-sectional study | Pittsburgh Sleep Quality Index                                                      | Sleep Quality        | 64 experienced sleep difficulties before COVID-19 crisis and 21 (9.68%) had a history of consuming medication for sleep difficulties. Prevalence of poor SQ during the COVID-19 pandemic and its stresses increased to 171 (78.8%), with a global PSQI score mean (SD) of 9.36 $\pm$ 4.4; the worst components of SQ were sleep latency, duration, and efficacy. HCWs with poor sleep had higher weekly working hours compared with those with good sleep (67.25% versus 47.83, $p = 0.015$ ). Among the 32 participants who did swabs for suspected COVID-19 patients during their duties, 30 (93.75%) of them ( $p = 0.01$ ) experienced poor sleep. |
| Abdelghani et al., 2021 | Egypt               | 218 HCWs from Egypt.. The mean age of the participants was 39.5 $\pm$ 8.5 years. The majority were females ( $n = 156$ ,                                                                                                                                                                                  | 218         | Cross-sectional study | short health anxiety inventory (SHAI)                                               | Sleep duration       | Those who reported higher levels of health anxiety to COVID-19 virus infection were more likely to be identified as working more days weekly (5.7 $\pm$ 0.8 days) and having lower sleeping hours (6.8 $\pm$ 0.9 hours).                                                                                                                                                                                                                                                                                                                                                                                                                               |

|                         |              |                                                                                                                                                                                                                                                     |     |                       |                                                                                |                                                                   |                                                                                                                                                                                                                                                                                                                                                                                                                                                                                  |
|-------------------------|--------------|-----------------------------------------------------------------------------------------------------------------------------------------------------------------------------------------------------------------------------------------------------|-----|-----------------------|--------------------------------------------------------------------------------|-------------------------------------------------------------------|----------------------------------------------------------------------------------------------------------------------------------------------------------------------------------------------------------------------------------------------------------------------------------------------------------------------------------------------------------------------------------------------------------------------------------------------------------------------------------|
|                         |              | 72%), nurses (n=111, 51%), and married (n=192, 88%)                                                                                                                                                                                                 |     |                       |                                                                                |                                                                   |                                                                                                                                                                                                                                                                                                                                                                                                                                                                                  |
| Abdoli et al., 2021     | Iran         | A total of 321 full-time frontline hospital staff members in Farabi Hospital (mean age: 36.86; 58% females)                                                                                                                                         | 321 | Cross-sectional study | Athens Insomnia Scale                                                          | Sleep problems (insomnia)                                         | Of the 321 participants, 44 (13.7%) had an insomnia score of 0 to 5 points; 272 (86.3%) had a score of six points and higher. The odds to report insomnia was 3.14-fold higher (CI: 2.64–3.75) among participants compared to the general population.                                                                                                                                                                                                                            |
| Abu-Elenin et al., 2021 | Egypt        | 237 physicians, their mean age was 38.2 ± 6.2 years and 58% of them were males.                                                                                                                                                                     | 237 | Cross-sectional study | Electronic questionnaire on mental health including quesitons on sleep quality | Sleep quality                                                     | The mean rate for sleep quality were poor; at 6.5 ± 3.2 out of 10                                                                                                                                                                                                                                                                                                                                                                                                                |
| Al Ammari et al., 2020  | Saudi Arabia | 720 complete responses. 194 (26.94%) Physicians, 262 (36.39%) Nurses, and 171 (23.75%) pharmacists completed the survey. The participants' female respondents (64.17%) were almost double the males (35.83%), with nearly 75% above 30 years of age | 720 | Cross-sectional study | Insomnia severity index                                                        | Sleep problems (insomnia)                                         | The largest proportion of health care workers (85.83%) experienced absence to subthreshold insomnia (57.08 and 28.75%, respectively). The rest (14.16%) reported moderately severe to severe insomnia (10.41% and 3.75%, respectively)                                                                                                                                                                                                                                           |
| Al Maqbali et al., 2021 | Oman         | Frontline nurses, majority were female (90.7%, n = 895), and were married (85%, n = 839). The largest age group was those aged 31–40 years (59.5%, n = 587), followed by 41–50 years (20.1%, n = 198)                                               | 987 | Cross-sectional study | Pittsburgh Sleep Quality Index                                                 | Sleep quality<br>Sleep duration<br>Sleep problems (sleep latency) | 580 (58.8%) experienced poor sleep quality<br>Average sleep duration was 7.04 (SD = 1.59) hours per night with 61.3% (n = 605) of participants reporting sleep of less than 7 h.<br>Mean of sleep latency was 38 min, with 71.4% (n = 705) of the participants reporting more than 15 min.<br>23.7% of the participants reported a sleep efficiency of less than 85%<br>30% rated their quality of sleep as “fairly bad” or “very bad”.<br>The two most common reasons for sleep |

|                        |                      |                                                                                                                                                                                                                                              |     |                       |                                                                                                       |                                 |                                                                                                                                                                                                                                                                                                                                                                |
|------------------------|----------------------|----------------------------------------------------------------------------------------------------------------------------------------------------------------------------------------------------------------------------------------------|-----|-----------------------|-------------------------------------------------------------------------------------------------------|---------------------------------|----------------------------------------------------------------------------------------------------------------------------------------------------------------------------------------------------------------------------------------------------------------------------------------------------------------------------------------------------------------|
|                        |                      |                                                                                                                                                                                                                                              |     |                       |                                                                                                       |                                 | disturbance were “could not get to sleep within 30 min”, and “waking up in the middle of the night or early morning” as reported by 56.03% and 54.31%.                                                                                                                                                                                                         |
| Alghufli et al., 2021  | United Arab Emirates | A total of 400 HCW completed the survey. Majority of them were females (84.5%, n = 338) and aged between 18 and 31 (53.5%, n = 214).                                                                                                         | 400 | Cross-sectional study | Insomnia Severity Index                                                                               | Sleep disorder (insomnia)       | 187 (46.8%) suffered from clinical insomnia HCWs in the fever clinic that had sub-threshold insomnia (26.4%, n = 14). While at the clean and mixed clinics, HCWs had subthreshold insomnia (38.2%, n = 47). Among the 3 HCWs working at telemedicine clinic, insomnia levels were between subthreshold and moderately severe (33.3%, n = 1 for each category). |
| Ali et al., 2021       | Saudi Arabia         | Out of 200 healthcare providers, 40% were males. 52% were aged 31–40 years old, 61% were married. The majority of the participants were Saudi nationals (84%), 74% were nurses, 11% were physicians and 15% were other healthcare providers. | 200 | Cross-sectional study | Insomnia Severity Index                                                                               | Sleep disorder (insomnia)       | Working as a physician was associated with insomnia (OR, 2.32; 95% CI, 0.89–6.07; P = < 0.05)                                                                                                                                                                                                                                                                  |
| Aljuffali et al., 2022 | Saudi Arabia         | 502 pharmacists were included in the present study. Their mean ( $\pm$ SD) age was 31 ( $\pm$ 8) years. Most respondents were female (51.8%). Moreover, most respondents were Saudi pharmacists (88.9%)                                      | 502 | Cross-sectional study | Survey items developed by the study's author including questions on sleep duration and sleep quality. | Sleep quality<br>Sleep duration | Sleeping disturbances were found to be related to high burnout levels                                                                                                                                                                                                                                                                                          |
| Almater et al., 2021   | Saudi Arabia         | One hundred and seven ophthalmologists successfully completed the survey with a response rate of 30.6%. Males constituted 56.1% (n = 60). Ophthalmology                                                                                      | 107 | simple random study   | Insomnia Severity Index                                                                               | Sleep problems (insomnia)       | Overall prevalence of insomnia was 44.9%; 32 had subthreshold symptoms (29.9%), 14 had moderate symptoms (13.1%), and 2 had severe symptoms (1.9%).<br><br>There was also a trend to experience symptoms of                                                                                                                                                    |

|                         |        |                                                                                                                                                                                                                   |      |                       |                                                                                    |                                                              |                                                                                                                                                                                                                                                                                                                                                                                                                                                                                                             |
|-------------------------|--------|-------------------------------------------------------------------------------------------------------------------------------------------------------------------------------------------------------------------|------|-----------------------|------------------------------------------------------------------------------------|--------------------------------------------------------------|-------------------------------------------------------------------------------------------------------------------------------------------------------------------------------------------------------------------------------------------------------------------------------------------------------------------------------------------------------------------------------------------------------------------------------------------------------------------------------------------------------------|
|                         |        | residents constituted the majority (n = 66, 61.7%)                                                                                                                                                                |      |                       |                                                                                    |                                                              | insomnia in frontline health-care providers (P = 0.129)                                                                                                                                                                                                                                                                                                                                                                                                                                                     |
| Almhdawi et al., 2022   | Jordan | 326 physicians of all Jordanian medical sectors and specialties successfully completed all of the study survey sections with a mean age of 32.08 (±6.93) ranged between 24–70 years and 44.2% of them were males. | 326  | Cross-sectional study | Survey items developed by the study’s author including questions on sleep quality. | Sleep quality                                                | poor sleep quality (58.3%)                                                                                                                                                                                                                                                                                                                                                                                                                                                                                  |
| Alshekaili et al., 2020 | Oman   | 1139 HCWs, 228 (20.0%) are males, and 911 (80.0%) are females. Their average age was 36.3±6.5 (mean±SD) ranging from 21 to 65 years. The majority were Omani (n=981, 86.1%) and were married (n=987, 86.9%).      | 1139 | Cross-sectional study | Insomnia Severity Index.                                                           | Sleep disorder (insomnia)                                    | 211 (18.5%) respondents were reported to have insomnia. HCWs in the frontline group were 1.5 times more likely to report insomnia (OR=1.586, p=0.013) as compared with those in the non-frontline group.                                                                                                                                                                                                                                                                                                    |
| Amra et al., 2021       | Iran   | Among the 372 HCW participants, 245 (66%) were women and mean age was 34.5 ± 7.1 years (age range 23 to 58).                                                                                                      | 372  | Cross-sectional study | Pittsburgh Sleep Quality Index<br>Insomnia Severity Index                          | Sleep quality<br>Sleep duration<br>Sleep disorder (Insomnia) | Those participants who were directly caring for the patients including physicians and nurses had significantly higher PSQI but lower ISI questionnaire scores relative to other participants. PSQI were significantly higher in the HCWs with positive coronavirus PCR ISI were significantly lower in the HCWs with positive Coronavirus RT-PCR than another group Positive association between COVID-like symptoms and sleep and mood disturbances was found in the group without a positive test result. |
| Araç et al., 2020       | Turkey | 210 volunteers, including 105 healthcare professionals in the emergency department (53.8% female) and 105 healthcare professionals                                                                                | 210  | Cross-sectional study | Pittsburgh Sleep Quality Index (PSQI)                                              | Sleep disorder                                               | PSQI subscale scores of the participants in the primary group were significantly higher than those of participants in the secondary group.                                                                                                                                                                                                                                                                                                                                                                  |

|                            |        |                                                                                                                                                                                                                                                                           |     |                       |                                    |                           |                                                                                                                                                                                                                                                                                                                                                                                                                                                                                                                                                                                                |
|----------------------------|--------|---------------------------------------------------------------------------------------------------------------------------------------------------------------------------------------------------------------------------------------------------------------------------|-----|-----------------------|------------------------------------|---------------------------|------------------------------------------------------------------------------------------------------------------------------------------------------------------------------------------------------------------------------------------------------------------------------------------------------------------------------------------------------------------------------------------------------------------------------------------------------------------------------------------------------------------------------------------------------------------------------------------------|
|                            |        | working in other departments (46.2% females) rendering services for COVID-19 patients.                                                                                                                                                                                    |     |                       |                                    |                           |                                                                                                                                                                                                                                                                                                                                                                                                                                                                                                                                                                                                |
| Aslan et al., 2022         | Turkey | 845 nurses completed the questionnaire. In total, 72.2% of the nurses were female, 78% were graduates, 57.2% were single, 53.8% had a medium-income level, 69.7% were working in a state hospital, and 7.6% had a chronic disease.                                        | 845 | Cross-sectional study | Bergen Insomnia Scale              | Sleep disorder (insomnia) | A positive correlation was found between COVID-19 Fear Scale and the Bergen Insomnia Scale ( $r = .392$ ; $p = .001$ ). The relationship between COVID-19 Fear and Bergen Insomnia Scale score averages and nurses' educational status, income level, shift working status, the status of their relatives being diagnosed with COVID-19, the state of being satisfied with the management of the pandemic process by the Ministry of Health, the situation of having resources in the settings where they work, the status of being in quarantine was statistically significant ( $p < .05$ ). |
| Aydin Sayilan et al., 2021 | Turkey | 267 nurses<br>The mean age of the nurses in this study was $28.03 \pm 5.99$ y (min: 21; max: 51), 75.3% were female, 63.3% were single, and 72.7% held an undergraduate degree.                                                                                           | 267 | Cross-sectional study | The Pittsburgh Sleep Quality Index | Sleep quality             | Nurses mostly experienced emotional exhaustion, and burnout levels increased in line with insomnia.                                                                                                                                                                                                                                                                                                                                                                                                                                                                                            |
| Åzahin et al., 2020        | Turkey | Six hundred twenty (66.0%) of the 939 HCWs taking part in this study were female, 339 (36.1%) were aged 26–30, 617 (65.7%) were married, 580 (61.8%) were physicians, 820 (87.3%) were working in an urban area, and 529 (56.3%) had been working for less than 10 years. | 939 | Cross-sectional study | Insomnia Severity Index            | Sleep disorder (insomnia) | 473 (50.4%) experienced insomnia symptoms<br>Female gender, having tested for COVID-19, and history of psychiatric illness emerged as risk factors for insomnia.<br>Nurses and frontline workers had a significantly higher insomnia score than other groups.                                                                                                                                                                                                                                                                                                                                  |
| Badahdah et                | Oman   | Examined sleep quality in                                                                                                                                                                                                                                                 | 150 | Cross-                | Sleep Quality                      | Sleep quality             | HCWs who scored 10 or higher on the 7-item                                                                                                                                                                                                                                                                                                                                                                                                                                                                                                                                                     |

|                                                                                        |                     |        |                                                                                                                                                                                                                             |     |                       |                                |                                 |                                                                                                                                                                                                                                                                                                |
|----------------------------------------------------------------------------------------|---------------------|--------|-----------------------------------------------------------------------------------------------------------------------------------------------------------------------------------------------------------------------------|-----|-----------------------|--------------------------------|---------------------------------|------------------------------------------------------------------------------------------------------------------------------------------------------------------------------------------------------------------------------------------------------------------------------------------------|
| 1<br>2<br>3<br>4<br>5<br>6<br>7<br>8<br>9<br>10<br>11<br>12                            | al., 2020           |        | a sample of 150 physicians (39.3%) and nurses (60.7%) who cared for patients with COVID-19 in Oman. Females made up 77.3% of participants. The average age was 37.62 years (standard deviation [SD] = 7.79 years).          |     | sectional study       | Scale                          |                                 | Generalized Anxiety Disorder Scale scored lower on sleep quality (mean = 5.98, SD = 2.29)<br>HCWs who scored less than 50 on the WHO-5 had a lower score on sleep quality (mean = 6.29, SD = 2.08)<br>The mean SQS score of 7 indicates that 40.1% of participants had poor sleep quality      |
| 13<br>14<br>15<br>16<br>17<br>18<br>19<br>20<br>21<br>22                               | Barut et al., 2021  | Turkey | There were 213 volunteers in of a healthcare team providing service for COVID-19 patients, females 60.9%.<br>163 healthcare team working without direct contact with COVID-19 patients, females 47.5%.                      | 379 | Cross-sectional study | Jenkins Sleep Scale            | Sleep quality<br>Sleep problems | Sleep problems and stress levels were significantly higher among healthcare professionals who had direct contact with COVID-19 (+) patients compared to those who did not (P<0.05).                                                                                                            |
| 23<br>24<br>25<br>26<br>27<br>28<br>29<br>30<br>31<br>32                               | Bilgiç et al., 2021 | Turkey | The average age of the nurses in this study was 32.24±8.41 years (min: 19; max: 56) and the average years worked was 10.31±9.08 years. 84.9%of the nurses were female, 50.0%were married, and 74.9%had a bachelor's degree. | 316 | Cross-sectional study | Pittsburgh Sleep Quality Index | Sleep quality                   | It was found that the average PSQI score of the nurses was 7.36±3.35 (min=1, max=20) a positively significant correlation was found between the average PSQI score of nurses and the PSS score. These findings suggest that nurses perceive high levels of stress and have poor sleep quality. |
| 33<br>34<br>35<br>36<br>37<br>38<br>39<br>40<br>41<br>42<br>43<br>44<br>45<br>46<br>47 | Bulut et al., 2021  | Turkey | Of the 348 healthcare professionals, 176 (50.6%) were women and 172 (49.4%) men, while 190 (54.6%) were doctors and 158 (45.4%) nurses. And 350 participants in the control group, 163 women (46.9%) and 186                | 698 | Cross-sectional study | Insomnia Severity Index        | Sleep disorder (insomnia)       | Healthcare professionals: 44 had insomnia (%12.6)<br>Nonhealthcare professionals: 45 had insomnia (%12.9)<br>Insomnia were found to be statistically significantly higher amongst those working in the "area of final diagnosis" (P = .002)                                                    |

|                   |      |                                                                                                                                                                                                                                                                                                                                                                                                                                                                                                                                                                                                                                                                                                                                                                                                                                                                                                                                          |      |                       |                         |                           |                                                                                                                                                                                                                                                                                               |
|-------------------|------|------------------------------------------------------------------------------------------------------------------------------------------------------------------------------------------------------------------------------------------------------------------------------------------------------------------------------------------------------------------------------------------------------------------------------------------------------------------------------------------------------------------------------------------------------------------------------------------------------------------------------------------------------------------------------------------------------------------------------------------------------------------------------------------------------------------------------------------------------------------------------------------------------------------------------------------|------|-----------------------|-------------------------|---------------------------|-----------------------------------------------------------------------------------------------------------------------------------------------------------------------------------------------------------------------------------------------------------------------------------------------|
|                   |      | men (53.1%)                                                                                                                                                                                                                                                                                                                                                                                                                                                                                                                                                                                                                                                                                                                                                                                                                                                                                                                              |      |                       |                         |                           |                                                                                                                                                                                                                                                                                               |
| Chan et al., 2021 | Oman | <p>A total of 1132 participants returned their completed questionnaire. A two-step cluster analysis was used to split the sample into three clusters. Clusters A, B and C contained 416 (36.7%), 412 (36.4%) and 304 (26.9%) HCWs, respectively. Cluster A was characterized by HCWs who were older (Mean <math>\pm</math> SD, 37.3 <math>\pm</math> 7.0 years) with more working experience (13.6 <math>\pm</math> 7.1 years) in the health-care setting. more than 84% (n = 353) had not handled any COVID-19 cases during the pandemic period. Cluster B was mostly around 36 years of age (SD = 6.3). The majority were physicians (43.4%, n = 179) or nurses (42.5%, n = 175) All were working in the frontline, and more than 60% (n = 257) had experienced COVID-19 cases in the pandemic. In Cluster C, most HCWs were nurses (44.1%, n = 134) and working in the tertiary care hospital (44.4%, n = 135). They were younger</p> | 1132 | Cross-sectional study | Insomnia Severity Index | Sleep disorder (insomnia) | <p>Cluster A: The majority did not report any symptoms of clinical insomnia (97.6%, n = 406)<br/> Cluster B: The majority did not report any symptoms of clinical insomnia (96.6%, n = 398)<br/> Cluster C: The majority reported clinical insomnia (60.2%, n = 183) during the pandemic.</p> |



|                           |        |                                                                                                                                                                                                                                                                   |      |                       |                                                                                     |                           |                                                                                                                                                                                                                                                                                                                                                                                                                                                                                                                                                                                                             |
|---------------------------|--------|-------------------------------------------------------------------------------------------------------------------------------------------------------------------------------------------------------------------------------------------------------------------|------|-----------------------|-------------------------------------------------------------------------------------|---------------------------|-------------------------------------------------------------------------------------------------------------------------------------------------------------------------------------------------------------------------------------------------------------------------------------------------------------------------------------------------------------------------------------------------------------------------------------------------------------------------------------------------------------------------------------------------------------------------------------------------------------|
|                           |        | (34.8 ± 5.7 years) and with less working experience (11.9 ± 5.9 years) There were around 50% (n = 159) working in the frontline only.                                                                                                                             |      |                       |                                                                                     |                           |                                                                                                                                                                                                                                                                                                                                                                                                                                                                                                                                                                                                             |
| Dolev et al., 2021        | Israel | Medical residents treating COVID-19: 20 internal medicine physicians, 7 physicians working in emergency departments. The non-COVID group: 31 internal medicine, 16 physicians working in emergency departments, 8 psychiatrists, 16 gynecologists, and 7 surgeons | 105  | Cohort study          | Pittsburgh Sleep Quality Index (PSQI)                                               | Sleep quality             | COVID-19 group had longer sleep duration (95% CI: COVID-19: 1.44–1.94 vs non-COVID-19: 0.15–0.37; U (27,64) = 313.00, P < 0.0001), longer sleep onset latency (95% CI: COVID-19: 1.75–2.01 vs non-COVID-19: 0.68–0.94; U (27,64) = 326.50, P < 0.0001), deteriorated daily function (95% CI: COVID-19: 2.54–2.91 vs non-COVID-19: 1.28–1.60; U(27,64) = 143.00, P < 0.0001), poorer sleep quality (95% CI: COVID-19: 2.75–3.01 vs non-COVID-19: 1.74–2.10; U(27,64) = 258.00, P < 0.0001), and worse global PSQI score (95% CI: COVID-19: 9.97–11.25 vs non-COVID-19: 4.57–5.27; t(89) = 9.751, P < 0.0001) |
| Durmaz Engin et al., 2021 | Turkey | 360 actively working ophthalmologists. While 64% of them worked in the pandemic hospitals, 44% were actively involved in COVID-related departments.                                                                                                               | 360  | Cross-sectional study | Insomnia Severity Index                                                             | Sleep disorder (insomnia) | Symptoms of insomnia were present in 46.9% of participants. Ophthalmologists working in a pandemic hospital were more likely to experience insomnia. Higher insomnia scores in female responders (p=0.002) and in those with a chronic disease (p=0.004). Higher levels of satisfaction with the hygiene conditions in COVID and the ophthalmology clinics lower ISI scores (p=0.004)                                                                                                                                                                                                                       |
| Elghazally et al., 2021   | Egypt  | Sample included 2331 physicians; 1177 of whom worked in front line hospitals (group II) and the remaining 1154 physicians (group I) in other health facilities (second line). The mean age of the participants is 34.3 ± 6.1                                      | 2331 | Cross-sectional study | Survey items developed by the study's author including questions on sleep duration. | Sleep duration            | In group I and group II (45.1% and 40.1% respectively) were at risk of falling or staying asleep or sleeping excessively.                                                                                                                                                                                                                                                                                                                                                                                                                                                                                   |

|                       |        |                                                                                                                                                                                                                                                                                                             |     |                       |                                                                                     |                           |                                                                                                                                                                                                                                                                                                                                        |
|-----------------------|--------|-------------------------------------------------------------------------------------------------------------------------------------------------------------------------------------------------------------------------------------------------------------------------------------------------------------|-----|-----------------------|-------------------------------------------------------------------------------------|---------------------------|----------------------------------------------------------------------------------------------------------------------------------------------------------------------------------------------------------------------------------------------------------------------------------------------------------------------------------------|
|                       |        | years. The majority of participants in group I and group II were in age group between 30 and 40 years (70.6% and 55%, respectively). In both groups, the majority of participants were females, married, urban dwellers, and specialists                                                                    |     |                       |                                                                                     |                           |                                                                                                                                                                                                                                                                                                                                        |
| Elgohary et al., 2021 | Egypt  | 270 health care workers (HCWs). The studied group age ranged from 18 to 52 years with mean $34.98 \pm 6.27$ years. 57% of HCWs were female. More than 72% of them had post-graduate education. Most frequent occupations among the participants were physicians and nurses (70.7% and 16.3%, respectively). | 270 | Cross-sectional study | Survey items developed by the study's author including questions on sleep duration. | Sleep duration            | There was a statistical significant decrease in sleep hours among HCWs with severe and extremely severe depression.                                                                                                                                                                                                                    |
| Elkholy et al., 2021  | Egypt  | 502 HCW dealing with COVID-19 in 20 hospitals in different parts of egypt; 60.0% were physicians, 16.1% were specialized nurses, and 23.9% were non-specialized nurses. About 35.3% worked in chest hospitals, 17.5% in fever hospitals, and 47.2% in quarantine hospitals.                                 | 502 | Cross-sectional study | Insomnia Severity Index                                                             | Sleep disorder (insomnia) | According to the insomnia severity scale 320 (67.7%) showed positive results; 195 (41.2%) were sub-threshold, 101 (21.4%) were moderate and 24 (5.1%) were severe. Participants with age group (31–40) were at higher risk of severe insomnia compared to those with >40 years old participants (OR, 2.79; 95% CI, 1.02–7.66; p = .01) |
| Hawari et al., 2021   | Jordan | 937 practitioners (56.1% females). Approximately 68%, 14%, and 18% were nurses/technicians,                                                                                                                                                                                                                 | 937 | Cross-sectional study | Survey items developed by the study's author including                              | Sleep quality             | Sleep disturbances were reported (in past seven days) by approximately 29% of subjects.                                                                                                                                                                                                                                                |

|                        |         |                                                                                                                                                                                                               |     |                       |                                    |                           |                                                                                                                                                                                                                                                                                                                                                                                                                                                                                                                                   |
|------------------------|---------|---------------------------------------------------------------------------------------------------------------------------------------------------------------------------------------------------------------|-----|-----------------------|------------------------------------|---------------------------|-----------------------------------------------------------------------------------------------------------------------------------------------------------------------------------------------------------------------------------------------------------------------------------------------------------------------------------------------------------------------------------------------------------------------------------------------------------------------------------------------------------------------------------|
|                        |         | physicians, and pharmacists (respectively).                                                                                                                                                                   |     |                       | questions on sleep-related issues. |                           |                                                                                                                                                                                                                                                                                                                                                                                                                                                                                                                                   |
| Jahrami et al., 2021   | Bahrain | A total of 257 participants (129 FLHCW and 128 NFLHCW)                                                                                                                                                        | 280 | Cross-sectional study | Pittsburgh Sleep Quality Index     | Sleep quality             | The FLHCW scored higher in the PSQI and PSS compared with the NFLHCW; however, the difference in the PSQI score was not statistically significant.<br>For the FLHCW, 75% were poor sleepers, 85% had moderate-severe stress, and 61% had both poor sleep quality and moderate-severe stress. For the NFLHCW, 76% were poor sleepers, 84% had moderate-severe stress, and 62% had both poor sleep quality and moderate-severe stress. Female sex and professional background were the predictors of poor sleep quality and stress. |
| Kandemir et al., 2022  | Turkey  | The study was performed with 194 nurses working in the intensive care units of five hospitals in Istanbul.                                                                                                    | 194 | Cross-sectional study | Insomnia Severity Index            | Sleep disorder (insomnia) | 39.7% of the nurses experienced moderate (21.6%) or severe insomnia (18.1%).                                                                                                                                                                                                                                                                                                                                                                                                                                                      |
| Karabulut et al., 2021 | Turkey  | 210 health care professionals working in ICUs were included in the study. Of the participants, 159 (75.4%) were female, and 185 (88.1%) were nurses. The mean age of the participants was 27.04 ± 5.71 years. | 210 | Cross-sectional study | Visual analog sleep scale          | Sleep quality             | a positive relationship was found between state anxiety and sleep ( $r = 0.158$ , $p = 0.022$ )<br><br>The mean perceived visual analog sleep score was moderate and found as $503.79 \pm 134.24$                                                                                                                                                                                                                                                                                                                                 |
| Khamis et al., 2020    | Oman    | 402 female doctors and nurses recruited from several health facilities in Oman.<br>A total of 231 (57.5%) Omanis and 171 (42.5%) non-Omanis participated in this study. Of the total 402 participants, 28.4%  | 402 | Cross-sectional study | Sleep Quality Scale                | Sleep quality             | 39.3% had poor sleep quality; this was particularly prevalent among Omanis.<br>A multiple regression analysis revealed that anxiety, stress, and well-being were significant predictors of poor sleep quality.                                                                                                                                                                                                                                                                                                                    |

|                      |              |                                                                                                                                                                                                                                                                                                                        |      |                                |                                                                                            |                            |                                                                                                                                                                                                                                                                                                                                                                                                                                                                                                                                                                                                                    |
|----------------------|--------------|------------------------------------------------------------------------------------------------------------------------------------------------------------------------------------------------------------------------------------------------------------------------------------------------------------------------|------|--------------------------------|--------------------------------------------------------------------------------------------|----------------------------|--------------------------------------------------------------------------------------------------------------------------------------------------------------------------------------------------------------------------------------------------------------------------------------------------------------------------------------------------------------------------------------------------------------------------------------------------------------------------------------------------------------------------------------------------------------------------------------------------------------------|
|                      |              | were physicians and 71.6% were nurses. One in four (27.9%) participants reported caring for COVID-19 patients                                                                                                                                                                                                          |      |                                |                                                                                            |                            |                                                                                                                                                                                                                                                                                                                                                                                                                                                                                                                                                                                                                    |
| Meo et al., 2021     | Saudi Arabia | HCWs: 859 (51.2%) females, and 819 (48.8%) males                                                                                                                                                                                                                                                                       | 1678 | Observational-analytical study | Pittsburgh Sleep Quality Index (PSQI)                                                      | Sleep quality              | 1376 (82.0%) of the HCWs had poor sleep quality ( $\geq 5$ global PSQI score). The results show that 975 (58.10%) were frontline HCWs, and 407 (23.89%) were second-line HCWs who suffered from poor sleep quality. The highest poor sleep quality levels were identified among HCWs who work in frontline areas (emergency departments, intensive care units, and wards) (642 (84.6%)), in comparison with others who work in second-line areas (734 (79.9%)). 585 (85.7%) HCWs directly involved were suffering from poor sleep quality in comparison with 791 (79.5%) non-directly involved healthcare workers. |
| Mosheva et al., 2020 | Israel       | 1106 Israeli physicians (564 males and 542 females) during the COVID-19 outbreak.                                                                                                                                                                                                                                      | 1106 | Cross-sectional study          | Survey items developed by the study's author including questions on sleeping difficulties. |                            | Found a positive association between sleep difficulties and higher levels of anxiety among physicians.<br><br>Sleeping difficulties score (1.81/5) $\pm$ 0.88                                                                                                                                                                                                                                                                                                                                                                                                                                                      |
| Mousavi et al., 2021 | Iran         | 321 HCWs from major tertiary hospitals in Isfahan which were dedicated to COVID-19 patients. The mean age of participants was 33.5 years (SD: 7.65, range: 23–65). The mean of working experience in our study sample was 6.7 years (SD: 6.20, range: 1–30). In the study sample, 236 (73.8%) participants were female | 321  | Cross-sectional study          | Insomnia Severity Index                                                                    | Sleep disorders (insomnia) | The mean score of ISI was 10.3 (SD: 5.95, range: 0–25), and just 123 (38.8%) participants had normal sleep.<br><br>The Pearson correlation analysis revealed that there is a statistically significant correlation between GHQ-12 and age (r: -0.12, P: 0.02), working year (r: -0.12, P: 0.03), ISI score (r: 0.56, P: 0.000), and social support score (r: -0.27, P: 0.000)                                                                                                                                                                                                                                      |

|                        |        |                                                                                                                                                                                                                                                                                                            |     |                       |                         |                           |                                                                                                                                                                                                                                                                                                                                                                                                                                                                                                                |
|------------------------|--------|------------------------------------------------------------------------------------------------------------------------------------------------------------------------------------------------------------------------------------------------------------------------------------------------------------|-----|-----------------------|-------------------------|---------------------------|----------------------------------------------------------------------------------------------------------------------------------------------------------------------------------------------------------------------------------------------------------------------------------------------------------------------------------------------------------------------------------------------------------------------------------------------------------------------------------------------------------------|
|                        |        | and 156 (48.6%) of them were a nurse.                                                                                                                                                                                                                                                                      |     |                       |                         |                           |                                                                                                                                                                                                                                                                                                                                                                                                                                                                                                                |
| Nashwan et al., 2021   | Qatar  | A total of 200 nurses participated in the study (response rate 13.3%). About 74.5% of nurses were working in COVID-19 facilities. Around 19.0%, 65.5%, and 15.5% of nurses were aged 20–30, 31–40, and above 40 years, respectively. About 59.5% and 80.0% of nurses were males and married, respectively. | 200 | Cross-sectional study | Insomnia Severity Index | Sleep disorder (insomnia) | In this study, there were no significant differences in sleep quality, stress, anxiety, depression, and perceived social support between nurses working in COVID-19 and non-COVID-19 facilities in Qatar                                                                                                                                                                                                                                                                                                       |
| Oteir et al., 2022     | Jordan | A total of 122 HCWs participated in the study (response rate=64.2%). Among the participants, 44.3% were physicians, 32.8% were nurses and 17.2% were paramedics. The mean age of participants was 32.1 (±5.8) years, and the majority were males (80.3%)                                                   | 122 | Cross-sectional study | Insomnia Severity Index | Sleep disorder (insomnia) | insomnia (31.9%), with increased severity of insomnia among paramedics<br><br>Mean score of ISI was 11.2 (±6.4)                                                                                                                                                                                                                                                                                                                                                                                                |
| Sis Çelik et al., 2021 | Turkey | 211 nurses using a web-based online survey in Turkey (including 104 nurses working in wards where patients with COVID-19/107 nurses working in wards where patients without COVID-19).<br><br>It was determined that the average age                                                                       | 211 | Cross-sectional study | Post-Sleep Inventory    | Sleep disorders           | it was found that 31.8% of the Nurses involved in the study had very serious sleep problem during the COVID-19 period, and 21.3% had a moderate problem<br><br>When the sleep problems experienced were compared according to the Post-Sleep Inventory, it was determined that the difference between the groups was not statistically significant (p>0.05). There was a moderately significant and positive correlation between the nurses' mean scores for the COVID-19 Fear Scale and Post-Sleep Inventory. |

|                  |        |                                                                                                                                                                                                                                          |     |                       |                                                                                         |               |                                                                                                                                                                                                                                                                                                                                                                                                                                                                                                                                                                                                                                                                                                                                                                                                                                                                                                                                                                                                                                                                                                                                                                                                                                                                              |
|------------------|--------|------------------------------------------------------------------------------------------------------------------------------------------------------------------------------------------------------------------------------------------|-----|-----------------------|-----------------------------------------------------------------------------------------|---------------|------------------------------------------------------------------------------------------------------------------------------------------------------------------------------------------------------------------------------------------------------------------------------------------------------------------------------------------------------------------------------------------------------------------------------------------------------------------------------------------------------------------------------------------------------------------------------------------------------------------------------------------------------------------------------------------------------------------------------------------------------------------------------------------------------------------------------------------------------------------------------------------------------------------------------------------------------------------------------------------------------------------------------------------------------------------------------------------------------------------------------------------------------------------------------------------------------------------------------------------------------------------------------|
|                  |        | <p>of the nurses working in wards where patients with COVID-19 are hospitalized was 29.04±6.42.</p> <p>It was determined that the average age of nurses working in wards where patients without COVID-19 are admitted was 26.22±4.89</p> |     |                       |                                                                                         |               |                                                                                                                                                                                                                                                                                                                                                                                                                                                                                                                                                                                                                                                                                                                                                                                                                                                                                                                                                                                                                                                                                                                                                                                                                                                                              |
| Taş et al., 2021 | Turkey | <p>448 Family Physicians participated in the study. The average age of the participants in the study was 39.10 ± 9.59 (min 24, max 65).</p>                                                                                              | 448 | Cross-sectional study | <p>Survey items developed by the study's author include questions on sleep quality.</p> | Sleep quality | <p>While the rate of family physicians who evaluated sleep quality as very poor before the onset of the pandemic was 1.3% (n = 6), this rate increased to 13.8% during the pandemic process (n = 62). While the rate of those who reported sleep quality as poor before the pandemic was 12.7% (n = 57), this rate increased to 48.2% (n = 216) after the pandemic. While 65.4% (n = 293) of the family physicians participating in the study defined sleep quality as good before the pandemic, this rate decreased to 35.7% (n = 160) after the pandemic. While the rate of those who stated that the quality of sleep before pandemic was very good was 20.5% (n = 92), this rate decreased to 2.2% (n = 10) after the pandemic (p &lt; 0.001).</p> <p>Thinking that personal protective measures were insufficient (p = 0.000) and working as a practitioner as a professional title were the most important factors affecting the deterioration of sleep quality (p = 0.004). Age, gender, marital status, having a child, the institution of employment, the years spent in the profession, and having contact history with Covid-19 positive cases were not effective in impairing sleep quality (p &gt; 0.05).</p> <p>Family physicians whose workload dimension</p> |

|                                 |        |                                                                                                                                                                                                                                                                                                                            |     |                       |                                |                           |                                                                                                                                                                                                                                                                                                                                                                                                                                                                                                                                                                                                                                                                                                                                |
|---------------------------------|--------|----------------------------------------------------------------------------------------------------------------------------------------------------------------------------------------------------------------------------------------------------------------------------------------------------------------------------|-----|-----------------------|--------------------------------|---------------------------|--------------------------------------------------------------------------------------------------------------------------------------------------------------------------------------------------------------------------------------------------------------------------------------------------------------------------------------------------------------------------------------------------------------------------------------------------------------------------------------------------------------------------------------------------------------------------------------------------------------------------------------------------------------------------------------------------------------------------------|
|                                 |        |                                                                                                                                                                                                                                                                                                                            |     |                       |                                |                           | increased were the family physicians whose sleep quality deteriorated during the pandemic (p = 0.000).                                                                                                                                                                                                                                                                                                                                                                                                                                                                                                                                                                                                                         |
| Tasdemir Yigitoglu et al., 2021 | Turkey | 435 healthcare staff members. Their mean age turned out to be 36.76 ± 7.58. Slightly more than half of the participants were women (56.1%, n = 244), whereas 67.8% (n = 295) were married and 66.9% (n = 291) were parents.                                                                                                | 435 | Cross-sectional study | Pittsburg Sleep Quality Index  | Sleep quality             | <p>Their mean PSQI score was 8.42 ± 2.30, and poor sleep quality was identified in an overwhelming majority of the healthcare staff (92.9%, n = 404).</p> <p>As for the sleep quality scores derived from the PSQI data, strong evidence was found for the within-group differences in terms of gender (female healthcare staff suffer from poorer sleep quality), parenthood (poor sleep quality in the enrolled healthcare staff with children), years of experience in the current department, health-related problems, history of mental disorders, and job satisfaction (p &lt; 0.05)</p>                                                                                                                                 |
| Yilmaz et al., 2021             | Turkey | Four hundred thirty-four healthcare workers participated in the study, of whom 70.7% were under 35 years of age, 65.0% were female, 60.6% were married, 64.1% were physicians, 56.7% held a master's degree or above, 73.0% worked in a hospital, 50% worked on the frontline and 36.4% had 5-10 years' working experience | 278 | Cross-sectional study | Pittsburgh Sleep Quality Index | Sleep quality             | <p>The total prevalence of poor sleep quality was 56.7%</p> <p>The prevalence of poor sleep quality was 67.3% in nurses, 55.4% in physicians and 42.3% in dentists. Poor sleep quality was more prevalent among women, nurses, hospital workers, frontline workers, individuals with &lt;5 years of work experience, those with low social support and individuals with increased traumatic stress levels. High levels of social support and family social support were identified as protective factors against poor sleep quality. Multivariate regression analyses showed that poor sleep quality was significantly associated with working in hospitals and high traumatic stress levels during the COVID-19 pandemic.</p> |
| Yilmaz et al., 2021             | Turkey | 600 Healthcare workers participated in this study. 364 were females and 236 were males with a mean age of 33.49 ± 7.29 years.                                                                                                                                                                                              | 600 | Cross-sectional study | Insomnia Severity Index        | Sleep disorder (insomnia) | <p>Mean ISI score was significantly higher among HCWs working in COVID-19 clinics and intensive care units (p=0.000; p=0.039). Mean ISI score was significantly higher in women than men (p=0.000; p=0.000; p=0.027; p=0.005).</p> <p>Mean ISI scores was significantly higher among nurses (p=0.008; p=0.004).</p>                                                                                                                                                                                                                                                                                                                                                                                                            |
| Youssef et al., 2020            | Egypt  | 540 healthcare professionals                                                                                                                                                                                                                                                                                               | 540 | Cross-sectional       | Insomnia Severity Index        | Sleep disorder (insomnia) | Just over one half of respondents (51.9%, n=280) reported sub-threshold insomnia to                                                                                                                                                                                                                                                                                                                                                                                                                                                                                                                                                                                                                                            |

|                      |         |                                                                                                                                                                                                                                                                                      |     |                       |                                |               |                                                                                                                                                                                                                                                                                                                                                                                                                                                                                                                                                                                                                                                                                                                                                                                                                                                                                                                                                                                                                                                                                                                                          |
|----------------------|---------|--------------------------------------------------------------------------------------------------------------------------------------------------------------------------------------------------------------------------------------------------------------------------------------|-----|-----------------------|--------------------------------|---------------|------------------------------------------------------------------------------------------------------------------------------------------------------------------------------------------------------------------------------------------------------------------------------------------------------------------------------------------------------------------------------------------------------------------------------------------------------------------------------------------------------------------------------------------------------------------------------------------------------------------------------------------------------------------------------------------------------------------------------------------------------------------------------------------------------------------------------------------------------------------------------------------------------------------------------------------------------------------------------------------------------------------------------------------------------------------------------------------------------------------------------------------|
|                      |         | <p>participated; their ages ranged from 20 to 70 years, with a mean of 37.3 (SD=9.2). The majority were male (54.4%, n=294), highly educated (postgraduate) (78.3%, n=423), physicians (77%, n=416), married (74.1%, n=400), had experience of five years or more (77.8%, n=420)</p> |     | study                 |                                |               | <p>severe insomnia. The quarantine group and the non-quarantine group had an insignificant difference in adverse psychological symptoms and insomnia.</p> <p>Insomnia was high among those who reported experiencing stress, depression and anxiety (P&lt;0.001).</p>                                                                                                                                                                                                                                                                                                                                                                                                                                                                                                                                                                                                                                                                                                                                                                                                                                                                    |
| Zarzour et al., 2021 | Lebanon | <p>A total of 628 healthcare workers completed the survey; 409 (66.2%) were younger than 40 years, and 441 (71.4%) were women. Of all participants, 503 (81.4%) were nurses, 52 (8.4%) were physicians and 63 (10.2%) were residents.</p>                                            | 628 | Cross-sectional study | Pittsburgh Sleep Quality Index | Sleep quality | <p>The mean (SD) scores on the PSQI for sleep quality for all respondents was 6.0 (3.7). 48.4% were "poor sleepers" as they got PSQI scores higher than 5.</p> <p>Participants who were aged more than 50 had lower sleep quality scores than those aged between 41 and 50 and significantly lower scores than those younger than 40 (P = 0.005 (PSQI))</p> <p>Residents had significantly higher sleep disturbances scores than practical nurses (P = 0.016). Registered nurses compared to physicians and practical nurses had significantly higher sleep quality scores ( P &lt; 0.001)</p> <p>Participants who reported having relatives or friends who got infected or quarantined had higher sleep disturbances scores than those who had not ( P = 0.019 for PSQI).</p> <p>Participants who were exposed to COVID-19 related media for more than 2 hours per day, had poorer sleep quality (P = 0.011) than those who were exposed to media less than 2 hours per day and to those who were not exposed at all.</p> <p>Greater number of stress sources was positively correlated to higher sleep disturbances ( r = 0.129, P</p> |



|  |  |  |  |  |  |  |                                                                                                                                                                                                                                                                                                                                                 |
|--|--|--|--|--|--|--|-------------------------------------------------------------------------------------------------------------------------------------------------------------------------------------------------------------------------------------------------------------------------------------------------------------------------------------------------|
|  |  |  |  |  |  |  | <p>= 0.001, respectively)</p> <p>Participants were asked whether they were still able to practice the strategies they normally use to deal with stress. Those who were still able to do it (60.4%) had lower anxiety and significantly lower sleep disturbances scores than those who were not (P = 0.096 for STAI and P = 0.011 for PSQI).</p> |
|--|--|--|--|--|--|--|-------------------------------------------------------------------------------------------------------------------------------------------------------------------------------------------------------------------------------------------------------------------------------------------------------------------------------------------------|

| Students            |                   |                                                                                                                                                                                                                                             |             |                       |                                                       |                                                    |                                                                                                                                                                                                                                                                                         |
|---------------------|-------------------|---------------------------------------------------------------------------------------------------------------------------------------------------------------------------------------------------------------------------------------------|-------------|-----------------------|-------------------------------------------------------|----------------------------------------------------|-----------------------------------------------------------------------------------------------------------------------------------------------------------------------------------------------------------------------------------------------------------------------------------------|
| Reference           | Location of Study | Population                                                                                                                                                                                                                                  | Sample Size | Study Design          | Sleep Health Measurement Tool                         | Sleep Health Domains                               | Main Findings                                                                                                                                                                                                                                                                           |
| Al Mukhaini et al., | Oman              | 376 Omani students who had returned to Oman from abroad due to the COVID19 pandemic. 255 male (67.8%) and 121 female (32.2%) participants. The mean age of the participants was 21.7 years old (SD = 3.8), ranging from 18 to 45 years old. | 376         | Cross-sectional study | Athens insomnia scale                                 | Sleep problems (insomnia scale)                    | 49.5% (n = 186) noted to be suffering from insomnia. Female students were 2.4 times (OR = 2.43; CI: 1.50–3.93; P < .001) more likely to be insomniac compared to male students. The risk of insomnia may be less in the subjects going for a walk (OR = 0.29; CI: 0.12–0.69; P = 0.008) |
| Ali et al., 2021    | Lebanon           | 510 secondary level school students from grades 9–12 participated in this online survey. Among these, 382 (74.9%) were females, and there was no significant difference in age between male and female students.                            | 510         | Cross-sectional study | Insomnia Severity Index Bedtime Procrastination Scale | Sleep disorder (Insomnia, bedtime procrastination) | Screen time of more than seven hours per day was significantly associated with insomnia (82%), and bedtime procrastination.                                                                                                                                                             |

|                         |              |                                                                                                                                                                                                                                                                                                                    |     |                       |                                                                                    |                                                              |                                                                                                                                                                                                                                                                                                                                                                                                                                                                                                                                                                                                                                                                                                                                                                                                                                                                                               |
|-------------------------|--------------|--------------------------------------------------------------------------------------------------------------------------------------------------------------------------------------------------------------------------------------------------------------------------------------------------------------------|-----|-----------------------|------------------------------------------------------------------------------------|--------------------------------------------------------------|-----------------------------------------------------------------------------------------------------------------------------------------------------------------------------------------------------------------------------------------------------------------------------------------------------------------------------------------------------------------------------------------------------------------------------------------------------------------------------------------------------------------------------------------------------------------------------------------------------------------------------------------------------------------------------------------------------------------------------------------------------------------------------------------------------------------------------------------------------------------------------------------------|
| Alrashed et al., 2021   | Saudi Arabia | Total number of participants was 453 from 3rd to 5th medical year, and intern medical students.                                                                                                                                                                                                                    | 453 | Cross-sectional study | Insomnia Severity Index                                                            | Sleep problems (insomnia)                                    | 162 (34.9%) of the participants had insomnia symptoms, among them 57.4% of females and 42.6% of males have insomnia. Participants with an age group between 22 and 25 have more sleep issues (43.2%) as compared to other age groups. 3rd-year students have more insomnia 36.41% as compared to other years. The age group 30 and above have a high prevalence of insomnia (OR = 1.67; P = 0.26), followed by the age group 26–29 (OR = 1.40; P = 0.19) Those who have a severe level of stress have ~3 times higher prevalence of insomnia (OR = 2.81; P = 0.0008), followed by a moderate level of stress (OR = 1.50; P = 0.15) Those who were involved in religious practices have less sleep problems. Similarly, those who have mentally accepted the current COVID situation also have less sleep problems (P = 0.0001) as compared to those who did not accept the current situation. |
| Alshammari et al., 2021 | Saudi Arabia | 186 replies were received from professional pharmacy students . Female students accounted for 64.5 percent of the total, which is in line with their general ratio in the Pharm.D. Program. The second professional year had the most participants (25.8%), while the sixth professional year had the least (7.0%) | 186 | Cross-sectional study | Survey items developed by the study's author including questions on sleep quality. | Sleep quality                                                | "Discovered that practically all students were plagued by symptoms of sadness, anxiety, tension, and poor sleep quality"                                                                                                                                                                                                                                                                                                                                                                                                                                                                                                                                                                                                                                                                                                                                                                      |
| Alyoubi et al., 2021    | Saudi Arabia | A total of 582 undergraduate students. 73% were female and 25% were male. The majority (78%) of undergraduate students                                                                                                                                                                                             | 582 | Cross-sectional study | Insomnia Severity Index                                                            | Sleep duration<br>Sleep quality<br>Sleep disorder (insomnia) | Over one-third of students reported that sleep had been impacted and worsened during the pandemic. 22% having trouble falling asleep, 17.9% waking up during the night, 8.8% waking up early in the morning, 25.9% have poor sleep quality, 22.7% feeling tired during the day, 9.3% have nightmares                                                                                                                                                                                                                                                                                                                                                                                                                                                                                                                                                                                          |

|                         |        |                                                                                                                                                                                    |     |                       |                                |                           |                                                                                                                                                                                                                                                                                                                                                                                                                                                                                                                                                                                                                                                                                                                                                                                                                                                                                                                                                                                                             |
|-------------------------|--------|------------------------------------------------------------------------------------------------------------------------------------------------------------------------------------|-----|-----------------------|--------------------------------|---------------------------|-------------------------------------------------------------------------------------------------------------------------------------------------------------------------------------------------------------------------------------------------------------------------------------------------------------------------------------------------------------------------------------------------------------------------------------------------------------------------------------------------------------------------------------------------------------------------------------------------------------------------------------------------------------------------------------------------------------------------------------------------------------------------------------------------------------------------------------------------------------------------------------------------------------------------------------------------------------------------------------------------------------|
|                         |        | were enrolled at the King Abdulaziz University and 16% were studying at Jeddah University in Saudi Arabia.                                                                         |     |                       |                                |                           | and 5.2% have poor dreams<br>This study showed that over half of students reported sleep disruption and 1.4% were taking melatonin supplements for the sleep problem. A small percentage (4.3%) had very mild sleep problem, while 16% reported a mild sleep problem, 21.8% moderate, 9.3% severe, and 1.2% very severe. There was no significant difference between older and younger students on the level of insomnia. Students reported a statistically high level of insomnia with a high level of depression, anxiety, perceived stress ( $p < 0.001$ ). Undergraduate students reported statistically more insomnia symptoms with a lower level of psychological resilience ( $r = -0.150, p < 0.001$ ). The level of insomnia was slightly higher for students who self-isolated<br>Students who received support from mental health services but had it stopped and offered online and declined before COVID-19 reported a significantly higher level of insomnia $F(5, 555) = 2.768, p = 0.018$ . |
| Bosi Bağcı et al., 2021 | Turkey | 340 interns accounting for 63.4 % of the target population completed the online questionnaire. Almost 60 % of the participants were composed of females and the mean age was 24.89 | 340 | Cross-sectional study | Pittsburgh Sleep Quality Index | Sleep quality             | Sleep quality during the COVID-19 compared to the pre-COVID-19 period was assessed and it was found that only 27.8 % of the interns observed no change in sleep quality. However, 38.6 % of the interns experienced an improvement and 33.6 % had a reduction in sleep quality. Then, the sleep quality of interns was evaluated with PSQI and 53.4 % of the students were found to have poor sleep quality during the COVID-19 period. The effect of gender on sleep quality was also evaluated and even though female students had a predilection towards poor sleep quality, there was no significant difference between genders ( $P = 0.075$ )                                                                                                                                                                                                                                                                                                                                                         |
| Cakmak et al., 2022     | Turkey | 564 students<br>The mean age of the participants was $28.13 \pm 0.49$ years (min: 18 / max: 90). While 71.1% of the participants were                                              | 564 | Cross-sectional study | Bergen Insomnia Scale          | Sleep disorder (insomnia) | The results revealed that 64.7% of the participants had insomnia. The findings suggest that there was no statistically significant difference between insomnia and age, educational attainment, smoking status, and who the participants lived during the quarantine ( $p > 0.05$ ).                                                                                                                                                                                                                                                                                                                                                                                                                                                                                                                                                                                                                                                                                                                        |

|                      |        |                                                                                                                                                                                                                                                                                                                                                             |        |                            |                                                                                                      |                                                               |                                                                                                                                                                                                                                                                                                                                                                                                                                                                              |
|----------------------|--------|-------------------------------------------------------------------------------------------------------------------------------------------------------------------------------------------------------------------------------------------------------------------------------------------------------------------------------------------------------------|--------|----------------------------|------------------------------------------------------------------------------------------------------|---------------------------------------------------------------|------------------------------------------------------------------------------------------------------------------------------------------------------------------------------------------------------------------------------------------------------------------------------------------------------------------------------------------------------------------------------------------------------------------------------------------------------------------------------|
|                      |        | female, 66.5% were single. It was found that 66.3% of the individuals were university students, and 82.8% did not have any chronic diseases.                                                                                                                                                                                                                |        |                            |                                                                                                      |                                                               | Those who used a phone or tablet before sleeping ( $p = 0.020$ ) were found to have significantly higher levels of insomnia than others. The mean days of uninterrupted home quarantine was higher for participants experiencing insomnia.                                                                                                                                                                                                                                   |
| Dalcali et al., 2021 | Turkey | mean age of students was $20.39 \pm 2.05$ years and 82% ( $n = 232$ ) were female, and 33.6% ( $n = 95$ ) were first-year students                                                                                                                                                                                                                          | 283    | Descriptive, correlational | Verran and Snyder-Halpern sleep scale (VAS)                                                          | sleep disturbance, effective sleep, daytime sleep             | Before COVID-19, 21.20% reported that their night sleep was interrupted, while during the COVID-19 period, this rate increased to 28.26% and this increase was considered to be statistically significant. There was a high-level positive significant correlation between students' sleep quality and state anxiety ( $r: 0.305$ , $p: 0.000^{**}$ ) and trait anxiety ( $r: 0.288$ ; $p: 0.000$ )                                                                          |
| Elakany et al., 2022 | Global | 3793 (22.3%) of students. 61.7% females and the mean age was 31.0 years ( $SD = 8.9$ )                                                                                                                                                                                                                                                                      | 17,008 | Cross-sectional study      | Online survey                                                                                        | changes in sleep pattern (sleeping more, less, or no changes) | 4,889 people (28.7%) reported change in sleep patterns. Compared to non-students, students had significantly higher odds of reporting changes in sleep ( $AOR = 1.52$ ; 95% CI: 1.39, 1.67). Participants from LICs and LMICs had lower odds of reporting changes in sleep ( $AOR = 0.74$ ; 95% CI: 0.58, 0.94 and $AOR = 0.67$ ; 95% CI: 0.61, 0.72). participants from UMICs, had significantly higher odds of reporting changes in sleep ( $AOR = 1.26$ ; 95% 1.15, 1.39) |
| Elsalem et al., 2020 | Jordan | 1019 students from Jordan University of Science and Technology agreed to participate in the study and completed the survey. Approximately, half of the participants were from Faculty of Medicine (51.32%), while the other half in descending order were students from Faculties of Nursing, Dentistry, Pharmacy and Applied Medical Sciences. Almost two- | 1019   | Cross-sectional study      | Survey items developed by the study's author include questions on sleep duration and sleep disorder. | Sleep duration. Sleep disorder (insomnia)                     | Student's experience of stress during exams was also found to be significantly associated with changes in sleeping hours. Among students who reported more stress with remote E-exams, 44.15% had reduction in their sleeping hours and 28.65% reported more consumption of medications to relief insomnia. Caffeine was mainly consumed to keep students more alert for exam preparation and was linked to loss of sleep during exams days                                  |

|                     |              |                                                                                                                                                                                                                                                             |      |                       |                                  |                                             |                                                                                                                                                                                                                                                                                                                                                                                                                                                                                                                                                                                                                                                                                                                                                                                     |
|---------------------|--------------|-------------------------------------------------------------------------------------------------------------------------------------------------------------------------------------------------------------------------------------------------------------|------|-----------------------|----------------------------------|---------------------------------------------|-------------------------------------------------------------------------------------------------------------------------------------------------------------------------------------------------------------------------------------------------------------------------------------------------------------------------------------------------------------------------------------------------------------------------------------------------------------------------------------------------------------------------------------------------------------------------------------------------------------------------------------------------------------------------------------------------------------------------------------------------------------------------------------|
|                     |              | thirds of the respondents (65.55%) were females.                                                                                                                                                                                                            |      |                       |                                  |                                             |                                                                                                                                                                                                                                                                                                                                                                                                                                                                                                                                                                                                                                                                                                                                                                                     |
| Göl et al., 2021    | Turkey       | 2630 nursing students. The mean age of students participating in the study was 21.30 ± 1.95 SD. The majority of them (82.1%) were female students and 11.4% had a chronic disease.                                                                          | 2630 | Cross-sectional study | GHQ-12                           | Sleep disorder (sleep pattern)              | Change in sleep pattern 62.9% (= 0.629)                                                                                                                                                                                                                                                                                                                                                                                                                                                                                                                                                                                                                                                                                                                                             |
| Goweda et al., 2020 | Saudi Arabia | 438 medical students were recruited from the second year to the sixth year among Umm Al-Qura University Faculty of Medicine. Half (50.5%) were female, nearly all (422, 96.3%) had a single marital status, and a minority (55, 12.6%) had chronic disease. | 438  | Cross-sectional study | Sleep-50 questionnaire           | Sleep disorders (narcolepsy, insomnia, CRD) | 323 (73.7%) of the participants complained of at least one sleep disorder. The most prevalent sleep disorder was Narcolepsy (NL) with 226 (51.6%), followed by 138 (31.5%) with insomnia, and 98 (22.4%) indicating Circadian Rhythm sleep Disorder (CRD)<br>87 (19.9%) of respondents positive for at least two combined sleep disorders, and 63 (14.4%) demonstrating three combined sleep disorders.<br><br>In the time students spent watching television and/or on smartphones, there was significant difference in students with sleep disorders (m=6.71 hours, SD=3.83) and those without (m=5.90 hours, SD=3.40) (p=0.004)<br><br>Significant relationship between gender and sleep disorder, with females more affected at 178 (80.5%) than males at 145 (66.8%) (p=0.001) |
| Grande et al., 2021 | Saudi Arabia | 152 nursing intern students were involved in this study. Among them, 73% are in the age of 20 years and below, while 23.7% are between 31 and 40 years of age, and 3.3% fall within the age range of 21–30 years old. In terms of gender,                   | 152  | Cross-sectional study | Quality of Life Evaluation Scale | Sleep quality                               | Sleep satisfaction score 1.99/5.00                                                                                                                                                                                                                                                                                                                                                                                                                                                                                                                                                                                                                                                                                                                                                  |

|                         |               |                                                                                                                                                                                                                                                                                                                                                   |      |                       |                                                                                      |                                       |                                                                                                                                                                                                                                                                                                                                                                                                                                                               |
|-------------------------|---------------|---------------------------------------------------------------------------------------------------------------------------------------------------------------------------------------------------------------------------------------------------------------------------------------------------------------------------------------------------|------|-----------------------|--------------------------------------------------------------------------------------|---------------------------------------|---------------------------------------------------------------------------------------------------------------------------------------------------------------------------------------------------------------------------------------------------------------------------------------------------------------------------------------------------------------------------------------------------------------------------------------------------------------|
|                         |               | 53.9% are males, and 46.1% are females.                                                                                                                                                                                                                                                                                                           |      |                       |                                                                                      |                                       |                                                                                                                                                                                                                                                                                                                                                                                                                                                               |
| Jalal et al., 2021      | Saudi Arabia  | 628 students studying bachelor's degree programs, between 18 and 30 years of age. 70.9% were female                                                                                                                                                                                                                                               | 628  | Cross-sectional study | Pittsburgh Sleep Quality Index                                                       | Sleep quality                         | Approximately, 188 (29.9%) students felt that sleep quality was good before lockdown, and 126 (20.1%) students felt the same during the lockdown. Moreover, the total sleeping time increased from 6.6 ± 2.3 hours per day to 8.3 ± 2.7 hours per day, which was also proved statistically significant (p = 0.001).                                                                                                                                           |
| Joseph et al., 2022     | Israel        | 533 undergraduate students of education submitted an online questionnaire before the lockdown and at its end.                                                                                                                                                                                                                                     | 533  | Prospective cohort    | Mini Sleep Questionnaire                                                             | Sleep quality                         | Levels of sleep quality (mean 5.34 [SD 0.92] vs mean 5.12 [SD 0.46], P=.02) and well-being (mean 3.79 [SD 0.62] vs mean 3.67 [SD 0.59], P=.02) were higher during the COVID-19 lockdown. These findings indicate that undergraduate students seem to have taken advantage of the change in lifestyle due to the lockdown, directing the free time toward improving health by engaging in more physical activity, thus improving sleep quality and well-being. |
| Kheirallah et al., 2021 | Jordan        | 1,404 students participated in the current study. About two-thirds (59.9%) of participants were females, 64.9% were enrolled at the two well-established medical schools at the University of Jordan (39.1%) and Jordan University of Science and Technology (JUST) (25.8%), and 59.6% were in the pre-clinical stage of their medical education. | 1404 | Cross-sectional study | Survey items developed by the study's author including questions on sleep disorders. | Sleep disorder (insomnia, nightmares) | About 13% of students self-reported experiencing increased insomnia, shallow sleep, nightmares, or insufficient sleep. In general, females self-reported experiencing significantly more sleeping problems than males. Likewise, students in the pre-clinical years experienced sleep problems (insomnia, shallow sleep, and insufficient sleep) significantly more frequently than those in their clinical years.                                            |
| Meo et al., 2022        | Saudia Arabia | The total number of medical and science students included was 782, out of whom 410 (52.4%) were medical                                                                                                                                                                                                                                           | 782  | Cross-sectional Study | Pittsburgh Sleep Quality Index,                                                      | Sleep quality<br>Sleep duration       | Out of 782 participants, 669 (85.55%) had poor sleep quality (≥5 Global PSQI score), while only 113 students had good sleep quality (<5 Global PSQI score). Out of 410 medical students, 336 (81.95%) had poor sleep quality, and 74                                                                                                                                                                                                                          |

|                               |              |                                                                                                                                                                                                                                                                                                                                                       |      |                       |                                                                                            |                                        |                                                                                                                                                                                                                                                                                                                                                                                                                                                                                                                                                                                                                                                                                                                    |
|-------------------------------|--------------|-------------------------------------------------------------------------------------------------------------------------------------------------------------------------------------------------------------------------------------------------------------------------------------------------------------------------------------------------------|------|-----------------------|--------------------------------------------------------------------------------------------|----------------------------------------|--------------------------------------------------------------------------------------------------------------------------------------------------------------------------------------------------------------------------------------------------------------------------------------------------------------------------------------------------------------------------------------------------------------------------------------------------------------------------------------------------------------------------------------------------------------------------------------------------------------------------------------------------------------------------------------------------------------------|
|                               |              | <p>students, and 372 (47.6%) were science students, including Physics, Chemistry, Mathematics, Statistics, Botany, and Zoology. Among medical students, 143 (34.9%) were in pre-clinical years (1st and 2nd), while 266 (64.9%) of them were in clinical years 3rd, 4th, and 5th-year medical students. Female students were 65.3% of the sample.</p> |      |                       |                                                                                            |                                        | <p>(18.05%) had good sleep quality. While out of 372 science students, 333 (89.5%) had poor sleep quality, and 39 (10.5%) had good sleep quality. Overall, it was seen that the sleep quality of science students was poorer (Mean Global PSQI score= 8.78) than their medical counterparts (mean Global PSQI score= 7.93)</p> <p>Sleep quality, sleep duration, and daytime dysfunction were poorer among pre-clinical students than clinical students</p> <p>Out of the selected cases with poor sleep quality (<math>\geq 5</math> PSQI score), 32.1% were males, and 67.9% were females.</p> <p>It was found that sleep disturbance and daytime dysfunction were poorer in students with higher BMI ranges</p> |
| Nakhostin-Ansari et al., 2020 | Iran         | <p>323 medical students have completed the questionnaire (response rate = 64.6%); 37.2% of them were clerks and 62.8% interns. The mean age of participants was 23.73 (SD = 1.62), and 47.7% of them were male and 52.3% female.</p>                                                                                                                  | 323  | Cross-sectional study | <p>Survey items developed by the study's author including questions on sleep patterns.</p> | Sleep disorder (sleep pattern changes) | <p>Changes in sleep pattern (74.3%)</p>                                                                                                                                                                                                                                                                                                                                                                                                                                                                                                                                                                                                                                                                            |
| Saadeh et al., 2021           | Jordan       | <p>6,157 undergraduate students (mean age <math>19.79 \pm 1.67</math> years, males 28.7%) from the University of Jordan</p>                                                                                                                                                                                                                           | 6157 | Cross-sectional study | <p>Pittsburgh Sleep Quality Index,</p>                                                     | Sleep quality                          | <p>The sleep quality of three-quarters of the participants was negatively affected by the extended quarantine. Nearly half of the participants reported poor sleep quality. The prevalence of poor sleep quality among participants was 76% (males: 71.5% and females: 77.8%).</p>                                                                                                                                                                                                                                                                                                                                                                                                                                 |
| Sarsak et al., 2022           | Saudi Arabia | <p>A total of 244 students completed the survey (60.7% were female). The mean age was <math>22.10 \pm 2.69</math></p>                                                                                                                                                                                                                                 | 244  | Cross-sectional study | <p>Survey items developed by the study's author include questions on</p>                   | Sleep quality                          | <p>34.5% (n=84) reported sleeping late and waking up more frequently.</p>                                                                                                                                                                                                                                                                                                                                                                                                                                                                                                                                                                                                                                          |

|                    |        |                                                                                                                                   |     |                       |                                                                                                     |               |                                                                                                                                                        |
|--------------------|--------|-----------------------------------------------------------------------------------------------------------------------------------|-----|-----------------------|-----------------------------------------------------------------------------------------------------|---------------|--------------------------------------------------------------------------------------------------------------------------------------------------------|
|                    |        |                                                                                                                                   |     |                       | sleep disturbances.                                                                                 |               |                                                                                                                                                        |
| Torun et al., 2020 | Turkey | 275 students. About 60.7% of the participants (n = 167) were female, 39.3% (n = 108) were male and the mean age was 22.10 ± 2.69. | 275 | Cross-sectional study | Survey items developed by the study's author include questions on sleep duration and sleep quality. | Sleep quality | After the COVID-19 pandemic, the sleep patterns of the participants changed as 29.5% (n = 81) asleep late, wake up frequently and can not fall asleep. |

| Children              |                   |                                                                                                                                                                                                                                                                      |             |                       |                                                                                                          |                                 |                                                                                                                                                                                                                                                                                                                                       |
|-----------------------|-------------------|----------------------------------------------------------------------------------------------------------------------------------------------------------------------------------------------------------------------------------------------------------------------|-------------|-----------------------|----------------------------------------------------------------------------------------------------------|---------------------------------|---------------------------------------------------------------------------------------------------------------------------------------------------------------------------------------------------------------------------------------------------------------------------------------------------------------------------------------|
| Reference             | Location of Study | Population                                                                                                                                                                                                                                                           | Sample Size | Study Design          | Sleep Health Measurement Tool                                                                            | Sleep Health Domains            | Main Findings                                                                                                                                                                                                                                                                                                                         |
| Alanazi et al., 2022  | Saudi Arabia      | A total of 1021 parents completed the survey, of which 78.8% were Saudis. Fifty-five per cent of respondents were mothers with an average age of 41 (±9.2) years. The mean age of the children was 8.5 (±1.85) years. Sixty per cent of the study sample were girls. | 1021        | Cross-sectional study | Survey items developed by the study's author including questions on sleeping duration and sleep quality. | Sleep duration<br>Sleep quality | Slightly more than half the children met the sleep recommendations (95% CI 52.9, 60.9)<br>Sleep quality was reasonably high (average of 5.4 [2.26] points out of 7.0)<br>Weak negative correlation between parent education level and the quality of their child's sleep (r = -0.11, p < 0.0001)                                      |
| Almhizai et al., 2021 | Saudi Arabia      | Questionnaire was completed by 1141 respondents. Of these, 454 were < 18 years old (360 were aged 16 - 18 years old, and 94 were < 15 years old). Thus, these respondents                                                                                            | 1141        | Cross-sectional study | Survey items developed by the study's author including questions on sleep quality and sleep duration.    | Sleep quality<br>Sleep duration | Higher age was associated with higher increase in the frequency of waking up (r = 0.076, P < 0.05), sleeping little (r = 0.058, P < 0.05)<br>Having relatives who were infected with COVID-19 was associated with sleeping little (r = 0.074, P < 0.01)<br>Children whose parents were divorced had higher scores on sleep disorders. |



|                          |              |                                                                                                                                                                                                                                                                                                                                                  |      |                       |                                                                                                                               |                                 |                                                                                                                                                                                       |
|--------------------------|--------------|--------------------------------------------------------------------------------------------------------------------------------------------------------------------------------------------------------------------------------------------------------------------------------------------------------------------------------------------------|------|-----------------------|-------------------------------------------------------------------------------------------------------------------------------|---------------------------------|---------------------------------------------------------------------------------------------------------------------------------------------------------------------------------------|
|                          |              | completed the questionnaire on behalf of themselves. The remaining 688 respondents were adults and completed the questionnaire on behalf of their children. Male and female children represented 42.5% and 57.5% of the study sample.                                                                                                            |      |                       |                                                                                                                               |                                 |                                                                                                                                                                                       |
| Almugti et al., 2021     | Saudi Arabia | 651 participants in total; slightly over half (58%) were female. The respondents answered questions related to their children. These items showed that the mean age of their children was 9±4 years, the majority of the children were living in apartments (63.9%), and that 89% of the children were living with both their father and mother. | 651  | Cross-sectional study | Survey items developed from a similar study on Arab Israeli children including questions on sleep quality and sleep duration. | Sleep duration<br>Sleep quality | During the COVID-19 outbreak, one-third of children had asked to sleep in their parents' beds. Study reports reduced sleep time among children compared with the pre-pandemic period. |
| Al-Rahamneh et al., 2021 | Jordan       | Data collected from 1309 parents (mothers = 1219 (93.1%); fathers = 90 (6.9%) children (n = 1309 male = 716 (54.7%) and female = 593 (45.3%)), they were between 5–11 years of age (8.1 ± 2.02 years) and most of them were studying at private schools (92.7%).                                                                                 | 1309 | Cross-sectional study | Children's emotional and behavioral symptoms questionnaire                                                                    | Sleep duration                  | 42.5% of children had 8 h or less of sleep per night, which is considered as a short sleeping duration.                                                                               |
| Bucak et                 | Adiyaman,    | Group 1 (school age                                                                                                                                                                                                                                                                                                                              | 372  | Comparati             | Children's Sleep                                                                                                              | Child's sleep                   | Total CSHQ scores were 41.57 ± 7.57 (20–60) in                                                                                                                                        |

|                       |        |                                                                                                                                                                                                                                                                                                     |     |                       |                                             |                                                                                                                                                                                                                 |                                                                                                                                                                                                                                                                                                                                                     |
|-----------------------|--------|-----------------------------------------------------------------------------------------------------------------------------------------------------------------------------------------------------------------------------------------------------------------------------------------------------|-----|-----------------------|---------------------------------------------|-----------------------------------------------------------------------------------------------------------------------------------------------------------------------------------------------------------------|-----------------------------------------------------------------------------------------------------------------------------------------------------------------------------------------------------------------------------------------------------------------------------------------------------------------------------------------------------|
| al.,2021              | Turkey | children of health worker parents): 122 participants, 66 (54.1%) females and 56 (45.9%) males<br>Group 2 (school age children of non-health worker parents): 250 participants, 129 (51.6%) females and 121 (48.4%) males                                                                            |     | ve study              | Habits Questionnaire (CSQH)                 | habits and sleep-related problems. 8 subscales included*: bedtime resistance, sleep onset delay, sleep duration, sleep anxiety, night wakings, parasomnias, sleep disordered breathing, and daytime somnolence. | Group 1 and 39.6 ± 8.47 (17–68) in Group 2 (p:0.03)                                                                                                                                                                                                                                                                                                 |
| Cahal et al., 2021    | Israel | Mean (±SD) age of patients was 6.2 years (4.7) with a range of 0–18 years. 276 (62%) males and 169 (38%) females<br>368 (82%) had a single respiratory disorder, the most common of which were asthma (n=291, 65%), recurrent pneumonia (n=96, 21.5%), bronchopulmonary dysplasia (BPD; n=32, 7.2%) | 445 | Cross-sectional study | Anonymous electronic questionnaire          | Secondary outcomes related to patients' lifestyles                                                                                                                                                              | During the lockdown, Sleep duration increased in 59 patients (13.4%), decreased in 227 patients (51.1%) and remained unchanged in 155 patients (35.1%). Older patients experienced increased screen time, decreased physical activity, and shorter sleep duration (p = .008, <.001, and <.001, respectively) compared to their younger counterparts |
| El Refay et al., 2021 | Egypt  | 765 responses were received from children and adolescents aged 4–16 years. 408 children (53.3%) were males and 357 participants (46.7%) were females. More than half of the participants                                                                                                            | 765 | Cross-sectional study | Sleep Disturbance Scale for Children score. | Sleep quality<br>Sleep disorder                                                                                                                                                                                 | The overall mean Sleep Disturbance Scale for Children score (SDSC) in participated groups was 44.6 ± 11.72 suggesting a widespread stressful impact of the lockdown<br>Only 25 (3.2%) of participants had an (SDSC) over 70 which indicate acute severe sleep disorder<br>502 (65.6%) showed the symptoms suggestive of sleep disorder.             |

|                       |        |                                                                                                                                                                                                                                                                                                                    |     |                       |                                                                                                       |                                                                      |                                                                                                                                                                                                                                                                                                                                                                                                                                                                                                                                                                                                                                                                          |
|-----------------------|--------|--------------------------------------------------------------------------------------------------------------------------------------------------------------------------------------------------------------------------------------------------------------------------------------------------------------------|-----|-----------------------|-------------------------------------------------------------------------------------------------------|----------------------------------------------------------------------|--------------------------------------------------------------------------------------------------------------------------------------------------------------------------------------------------------------------------------------------------------------------------------------------------------------------------------------------------------------------------------------------------------------------------------------------------------------------------------------------------------------------------------------------------------------------------------------------------------------------------------------------------------------------------|
|                       |        | 407 (53.2%) were enrolled in primary schools.                                                                                                                                                                                                                                                                      |     |                       |                                                                                                       |                                                                      | Disorders of initiating and maintaining sleep were the most common among participants as 168 (33.4%) of them were suffering from it while 79 (15.7%) children were suffering from excessive somnolence.<br>Significant positive correlations were found between SDSC and extra screen usage, understanding safety and quarantine measures, anxiety signs, and change in child lifestyle with (p = 0.029, 0.010, 0.001 and 0.001) sequentially<br>Significant positive correlation was found between family income affection and sleep disorder score (p =0.04)                                                                                                           |
| Ghanamah et al., 2021 | Israel | 382 parents answered a survey about their children.<br>51% of the children were males, the most representative grade was the first grade (21.2%), 11.8% of the children were detected in COVID-19 and 43.5% of the children were asked to be in isolation since they had been exposed to COVID-19 diagnosed person | 382 | Cross-sectional study | Survey items developed by the study's author including questions on sleep duration and sleep quality. | Sleep duration<br>Sleep quality                                      | 55.8% of the children, who before the pandemic outbreak used to sleep alone in their own bedroom, asked the parents to sleep in their parents' bed during the outbreak period.<br><br>41.4% showed sleep difficulties. (more in kindergarteners than in pre-kindergarteners)<br><br>More hours spent in sleep through the outbreak compared to before the outbreak<br><br>If the child was in isolation, those children asked their parents to sleep beside them more than the children who were not asked to be in isolation. In the families with diagnosed Coronavirus, the children asked to sleep beside the parents more than in families with no diagnosed member |
| Kaditis et al., 2021  | Global | 45.8% female; ages 3–17 years                                                                                                                                                                                                                                                                                      | 845 | Longitudinal study    | Online survey                                                                                         | Change in bedtime, change in wake time, and change in sleep duration | As a result of the observed shift in bedtime and wake time, the median sleep duration score on weekdays increased significantly during the pandemic compared to before (p < .001), while there was no significant change during the weekend (p = .51). More children had an increase in sleep duration on weekdays than a decrease, whereas similar proportions of children had an increase or a decrease on weekends. Increase in sleep duration during the pandemic was most apparent in the 14–17 years age group during weekdays, while a                                                                                                                            |

|                          |         |                                                                                                                                                                                                                                 |       |                       |                                                                                                     |                                                          |                                                                                                                                                                                                                                                                                                                                                                                                                                                                                                                                                                                                                                                                                                                                                          |
|--------------------------|---------|---------------------------------------------------------------------------------------------------------------------------------------------------------------------------------------------------------------------------------|-------|-----------------------|-----------------------------------------------------------------------------------------------------|----------------------------------------------------------|----------------------------------------------------------------------------------------------------------------------------------------------------------------------------------------------------------------------------------------------------------------------------------------------------------------------------------------------------------------------------------------------------------------------------------------------------------------------------------------------------------------------------------------------------------------------------------------------------------------------------------------------------------------------------------------------------------------------------------------------------------|
|                          |         |                                                                                                                                                                                                                                 |       |                       |                                                                                                     |                                                          | decrease in sleep duration was most prominent in 3- to 5-year-old children during both weekdays and weekends. Sleep duration did not change in 43% of participants on weekdays and 46.2% on weekends. Children aged 14–17 years were the least likely to have unchanged sleep duration on weekdays (28.4%).                                                                                                                                                                                                                                                                                                                                                                                                                                              |
| Kamaleddine et al., 2022 | Lebanon | 383 children whose parents agreed to use the responses for this study were finally included. The proportion of boys and girls was even.                                                                                         | 383   | Cross-sectional study | Children Sleep Habit Questionnaire                                                                  | Sleep quality                                            | Observed that children with screen time $\geq 2$ h had sleep problems.                                                                                                                                                                                                                                                                                                                                                                                                                                                                                                                                                                                                                                                                                   |
| Mekkawy et al., 2022     | Egypt   | Participants in this study (n=672) were divided according to age into 4 main categories, 6–9 years (21.7%), 9–12 years (24.4%), 12–15 years (30.1%) and 15–18 years (23.8%). Males represented 48.2% and females 51.8%          | 672   | Cross-sectional study | BEARS sleep screening tool                                                                          | Sleep duration<br>Sleep quality<br>Sleep disorders       | 50% reported increase in their sleeping habit, 31.8% reported no change while 45.2% stated no sleeping problems, 19% had a difficulty to fall asleep, 16.1% had a problem waking up during sleep, 11.9% had a problem waking up feeling tired, & 7.7% had a problem sleeping too much. When comparing the sleep habits pre COVID-19 with the lockdown, results had shown significant decrease in the % of sleeping less than 7 hours from 41.4% to 5.4%, while there was significant increase in the % of sleeping more than 10 hours from 4.8% to 49.7% (p<0.001). On the other hand, the energy level status of being energized significantly decreased from 55.4% to 7.7%, and significantly increased in the lazy state from 3.6% to 54.8% (p<0.001) |
| Ranjbar et al., 2021     | Iran    | 20697 filled questionnaires were received from the participants with an average age of 13.76 $\pm$ 2.50 which included 6139 (29.7%) male and 14558 (70.3%) females. Among the participants, 16672 (80.6%) were from urban areas | 20697 | Cross-sectional study | Survey items developed by the study's author include questions on sleep duration and sleep pattern. | Sleep duration<br>Sleep disorder (sleep pattern changes) | 2782 (13.4%) students had 5 or fewer hours of sleep, 2689 (13%) had 6 to 8 h, 2655 (12.8%) had 9 to 10 h, 1506 (7.3%) had 11 to 12 h, and 11065 (53.5%) had above 12 h of sleep throughout the day. The majority (8934: 43.2%) of students went to bed between 23 and 24 P.M. while the majority (11585: 56%) woke up at 8 A.M.                                                                                                                                                                                                                                                                                                                                                                                                                          |

|                          |        |                                                                                                                                                                                                                                                                                                                      |      |                       |                                                                                                       |                                                              |                                                                                                                                                                                                                                                                                                                                                                                                                                                                                                                                                                                                                                                                                      |
|--------------------------|--------|----------------------------------------------------------------------------------------------------------------------------------------------------------------------------------------------------------------------------------------------------------------------------------------------------------------------|------|-----------------------|-------------------------------------------------------------------------------------------------------|--------------------------------------------------------------|--------------------------------------------------------------------------------------------------------------------------------------------------------------------------------------------------------------------------------------------------------------------------------------------------------------------------------------------------------------------------------------------------------------------------------------------------------------------------------------------------------------------------------------------------------------------------------------------------------------------------------------------------------------------------------------|
|                          |        | and 4025 (19.4%) from rural areas.                                                                                                                                                                                                                                                                                   |      |                       |                                                                                                       |                                                              |                                                                                                                                                                                                                                                                                                                                                                                                                                                                                                                                                                                                                                                                                      |
| Ustuner Top et al., 2022 | Turkey | Of the 1040 children, 528 (50.8%) males and 512 (49.2%) females were included in the analyses. The mean age of the children was $9.16 \pm 2.05$ , and 80.3% were aged between 9 and 12 years.                                                                                                                        | 1040 | Cross-sectional study | The Children's Sleep Habits Questionnaire                                                             | Sleep quality<br>Sleep duration<br>Sleep disorder            | The prevalence of sleep disturbances among 6–12-year-old children during the COVID-19 pandemic in Turkey was 55.5%.<br>Sleep disturbances were found to be significantly associated with 6–8 years of age, and poor family relationships ( $p < 0.05$ ).<br><br>The most common sleep disturbances were bedtime resistance (51.9%), sleep onset delay (61.4%), and sleep duration (90.2%). The children's ages, family relationships, and eating habits were linked to their sleep disturbances. Moreover, their results indicated that sleep disturbances were more common in the children of parents who felt helpless, apprehensive, and frightened during the COVID-19 pandemic. |
| Zengin et al., 2021      | Turkey | 309 children. The average age of the children in the study was $10.3 \pm 1.2$ ; 52.1% of participants were male.                                                                                                                                                                                                     | 309  | Cross-sectional study | Survey items developed by the study's author including questions on sleep duration and sleep quality. | Sleep duration<br>Sleep quality                              | Children stated that due to the pandemic they experienced changes in terms of sleep (61.5%; $n = 190$ )<br><br>Some of the children in the present study stated that their sleeping habits have become irregular, and the majority of them had reduced their time for social activity. These findings are similar to our results.                                                                                                                                                                                                                                                                                                                                                    |
| Zreik et al., 2021       | Israel | Mothers of 264 children (120 boys), with a mean (SD, range) age of 31.27 (17.39, 6–72) months, participated in the study: 100 of the mothers were Arab and 141 were Jewish. Approximately 38% of the infants were firstborns, and families had a mean (SD) of 2.15 (0.95) children. The mean (SD) age of the mothers | 264  | Cross-sectional study | Insomnia Severity Index<br><br>Brief Infant/Child Sleep Questionnaire                                 | Sleep disorder (insomnia)<br>Sleep quality<br>Sleep duration | The majority of mothers reported no change in their child's sleep quality, duration, and sleeping arrangement. However, about 30% reported a negative change in child's sleep quality and a decrease in sleep duration, and there were also mothers who reported a positive change.<br><br>60% of the mothers reported a negative change in their sleep quality. In all, 23% of mothers scored above the clinical cut-off for insomnia (ISI score of $>15$ ) during the COVID-19 crisis, compared to only 11% who reported (retrospectively) having clinical insomnia before the COVID-19 crisis ( $\chi^2 (1) = 5.36$ ,                                                             |

1  
2  
3  
4  
5  
6  
7  
8  
9  
10  
11  
12  
13  
14  
15  
16  
17  
18  
19  
20  
21  
22  
23  
24  
25  
26  
27  
28  
29  
30  
31  
32  
33  
34  
35  
36  
37  
38  
39  
40  
41  
42  
43  
44  
45  
46  
47

|  |  |                                |  |  |  |                                                                                                                                                                                                                                                                                                                                                                                                                                                                                                                                                                                                                                                                                                                                                                                                                                                                                                                                                                                                                                                                                                                                                                                                                                                                                                                                                                                                                                                                                                                                                                                                                |
|--|--|--------------------------------|--|--|--|----------------------------------------------------------------------------------------------------------------------------------------------------------------------------------------------------------------------------------------------------------------------------------------------------------------------------------------------------------------------------------------------------------------------------------------------------------------------------------------------------------------------------------------------------------------------------------------------------------------------------------------------------------------------------------------------------------------------------------------------------------------------------------------------------------------------------------------------------------------------------------------------------------------------------------------------------------------------------------------------------------------------------------------------------------------------------------------------------------------------------------------------------------------------------------------------------------------------------------------------------------------------------------------------------------------------------------------------------------------------------------------------------------------------------------------------------------------------------------------------------------------------------------------------------------------------------------------------------------------|
|  |  | <p>was 33.97 (4.20) years.</p> |  |  |  | <p>p = .02).</p> <p>The current maternal ISI score was positively correlated with child's sleep latency, number of night awakenings, and wake after sleep onset, and was negatively correlated with sleep duration. Maternal acute COVID-19 anxiety was positively correlated with the child's number of night awakenings, and negatively correlated with the child's sleep duration. When examining the correlations between the current maternal ISI score and child's sleep variables with maternal acute COVID-19 anxiety as a covariate, the correlations with child's sleep variables, number of night awakenings and WASO, remained significant (r = .26, p = .001 and r = .31, p &lt; .001, respectively), while the correlations with child's sleep latency and sleep duration were no longer significant.</p> <p>The correlation between maternal acute COVID-19 anxiety and the current maternal ISI score was significant (r = .38, p &lt; .001) and remained significant after controlling for the child's sleep duration, number of night awakenings, and WASO (r = .40, p &lt; .001)</p> <p>The change in child's sleep quality was associated with the change in ISI score of the mother (r s = -.33, p &lt; .001), so that mothers who reported that their child's sleep improved during the COVID-19 crisis, were more likely to report a decrease in their own insomnia symptoms during the crisis.</p> <p>Mothers who reported that their child's sleep had negatively changed had higher levels of anxiety traits, compared to mothers who reported no change in their child's sleep.</p> |
|--|--|--------------------------------|--|--|--|----------------------------------------------------------------------------------------------------------------------------------------------------------------------------------------------------------------------------------------------------------------------------------------------------------------------------------------------------------------------------------------------------------------------------------------------------------------------------------------------------------------------------------------------------------------------------------------------------------------------------------------------------------------------------------------------------------------------------------------------------------------------------------------------------------------------------------------------------------------------------------------------------------------------------------------------------------------------------------------------------------------------------------------------------------------------------------------------------------------------------------------------------------------------------------------------------------------------------------------------------------------------------------------------------------------------------------------------------------------------------------------------------------------------------------------------------------------------------------------------------------------------------------------------------------------------------------------------------------------|

**Patients With Chronic Illnesses**

| Reference              | Location of Study | Population                                                                                                                                                                                                                                                                                                           | Sample Size | Study Design          | Sleep Health Measurement Tool                                                                         | Sleep Health Domains                                    | Main Findings                                                                                                                                                                                                                                                                                                                            |
|------------------------|-------------------|----------------------------------------------------------------------------------------------------------------------------------------------------------------------------------------------------------------------------------------------------------------------------------------------------------------------|-------------|-----------------------|-------------------------------------------------------------------------------------------------------|---------------------------------------------------------|------------------------------------------------------------------------------------------------------------------------------------------------------------------------------------------------------------------------------------------------------------------------------------------------------------------------------------------|
| Alkhotani et al., 2020 | Saudi Arabia      | A total of 156 patients with epilepsy completed the questionnaire. Sixty-two percent of our responders were female patients, 99% were living with family, 38% had generalized seizures, 47% were on single medications, and 48.1% had been seizure-free for the past three months prior to the start of the pandemic | 156         | Cross-sectional study | Survey items developed by the study's author including questions on sleep duration and sleep quality. | Sleep duration<br>Sleep quality                         | (71.2%) experienced a significant change in their sleep. Most frequent change in sleep was a reversal of the sleep pattern in 58% of the respondents (sleep after sunrise), followed by more sleep than usual in 9.6%, less sleep in 2.6%, and intermittent sleep in 0.6%.                                                               |
| Athamneh et al., 2021  | Jordan            | 506 (90.03%) neurology patients responded to the questionnaire. Patients under 40 years of age constituted over half the sample. Men constituted 45.45% of the sample.                                                                                                                                               | 506         | Cross-sectional study | Survey items developed by the study's author including questions on sleep duration.                   | Sleep quality<br>Sleep disorder (Sleep pattern changes) | Sleep disturbances were reported by nearly one in three patients who had epilepsy or headache, and the majority ascribed these disturbances to the impact of the pandemic. Changes in sleep patterns were reported by 37.50% of patients with tension/migraine headaches, and 50.00% blamed these changes to the impact of the pandemic. |
| Çolak et al., 2021     | Turkey            | Pregnant women mean age $30.17 \pm 5.47$ years                                                                                                                                                                                                                                                                       | 149         | Cross-sectional study | Pittsburgh Sleep Quality Index (PSQI)                                                                 | Sleep quality                                           | The depression, anxiety, and defective sleep quality levels of the participants who were previously in the home quarantine were statistically significantly higher ( $p < 0.001$ , $p < 0.001$ , $p < 0.001$ , respectively).                                                                                                            |
| Güç et al., 2022       | Turkey            | Of the 761 cancer patients, 480 (63.1%) are female and 281 (36.9%) are male. At the time of the study, their median age was 57.65 years (range, 20–90).                                                                                                                                                              | 761         | Cross-sectional study | Pittsburgh Sleep Quality Index                                                                        | Sleep quality                                           | Mean scores of the 761 participants PSQI, $5.67 \pm 4.24$ (range, 0–19). Quality of sleep was found bad in 447 (58.7%) (global score $\geq 5$ ). Multivariate analyses showed active treatment (OR: 21.4; 95% CI: 9.08–50.4; $p < 0.001$ ) as the major independent variable that affected sleep quality                                 |
| Karatel et al., 2022   | Turkey            | The study includes 1,778 responses of 1,131                                                                                                                                                                                                                                                                          | 1778        | Cross-sectional       | Pittsburgh Sleep Quality Index                                                                        | Sleep quality                                           | The PSQI-total had shown a weak correlation with pain levels in all body parts.                                                                                                                                                                                                                                                          |

|                     |        |                                                                                                                                                                                                     |      |                       |                                                                                   |                             |                                                                                                                                                                                                                                                                                                                                                                                                                        |
|---------------------|--------|-----------------------------------------------------------------------------------------------------------------------------------------------------------------------------------------------------|------|-----------------------|-----------------------------------------------------------------------------------|-----------------------------|------------------------------------------------------------------------------------------------------------------------------------------------------------------------------------------------------------------------------------------------------------------------------------------------------------------------------------------------------------------------------------------------------------------------|
|                     |        | (63.6%) women and 647 (36.4%) men. Mean age was 28.3 ± 10.7 years with musculoskeletal pain                                                                                                         |      | study                 |                                                                                   |                             | The highest correlation for sleep quality and pain levels was between the PSQI-5 and lower back pain. There was a weak correlation between PSQI-2 and the BDI score, and a moderate correlation between the PSQI-1, PSQI-5, PSQI-7, PSQI-total, and BDI score.                                                                                                                                                         |
| Keskin et al., 2022 | Turkey | 356 pregnant women were enrolled and completed the survey                                                                                                                                           | 356  | Cross-sectional study | The Epworth sleepiness scale                                                      | Sleep disorder (sleepiness) | Mild sleepiness was found in 88.2% and severe sleepiness in 11.8% of the pregnant women                                                                                                                                                                                                                                                                                                                                |
| San et al., 2021    | Turkey | 145 patients who underwent a spine intervention within the past year were included in this study, there were 96 women (66%) and 49 men (34%), with a mean age of 54.78 ± 1.08 years.                | 145  | Cross-sectional study | Survey items developed by the study's author include questions on sleep habits.   | Sleep quality               | 24 patients always had sleep disturbance, 30 patients often had sleep disturbance, 37 patients sometimes had sleep disturbance, 9 patients rarely had sleep disturbance, and 45 patients had no sleep disturbance                                                                                                                                                                                                      |
| Seyahi et al., 2020 | Turkey | Studied in total 771 (245 M/ 526 F) patients with Rheumatic disease (Group 1), 535 (181 M/ 354 F) hospital workers (Group 2) and 917 (258 M/ 659 F) teachers/academic staff (Group 3)               | 2223 | Cross-sectional study | Survey items developed by the study's author include questions on sleep problems. | Sleep disorder              | The frequency of sleep problems in patients with RD was significantly higher than that of the teachers/academic staff, but then again, significantly lower than that reported in the hospital workers.                                                                                                                                                                                                                 |
| Yeni et al., 2022   | Turkey | 89 PwMS (people with multiple sclerosis) and 262 healthy controls. Mean age of PwMS was 41.08 (±10.2) years; 62% were female. Mean age of the control group was 38.08 (±11.4) and 51.5% were female | 351  | Cross-sectional       | Pittsburgh Sleep Quality Index (PSQI)                                             | Sleep quality               | Healthy controls (HC): Compared to pre-pandemic period, the mean PSQI score was determined to increase indicating impaired sleep quality (p<0.001) Sleep quality of the patients was seen to be impaired during the pandemic (p<0.05) Multiple regression analysis demonstrated that the anxiety, depression, and the sleep problems were predictors of both the physical health (p<0.001) and mental health (p<0.001) |



1  
2  
3  
4  
5  
6  
7  
8  
9  
10  
11  
12  
13  
14  
15  
16  
17  
18  
19  
20  
21  
22  
23  
24  
25  
26  
27  
28  
29  
30  
31  
32  
33  
34  
35  
36  
37  
38  
39  
40  
41  
42  
43  
44  
45  
46  
47  
48  
49  
50  
51  
52  
53  
54  
55  
56  
57  
58  
59  
60

For peer review only

# BMJ Open

## The Effects of the COVID-19 Pandemic on Sleep Health Among Middle Eastern and North African (MENA) Populations: A Systematic Review of the Literature

|                                 |                                                                                                                                                                                                                                                                                                                                                                                                                |
|---------------------------------|----------------------------------------------------------------------------------------------------------------------------------------------------------------------------------------------------------------------------------------------------------------------------------------------------------------------------------------------------------------------------------------------------------------|
| Journal:                        | <i>BMJ Open</i>                                                                                                                                                                                                                                                                                                                                                                                                |
| Manuscript ID                   | bmjopen-2022-066964.R1                                                                                                                                                                                                                                                                                                                                                                                         |
| Article Type:                   | Original research                                                                                                                                                                                                                                                                                                                                                                                              |
| Date Submitted by the Author:   | 09-Nov-2022                                                                                                                                                                                                                                                                                                                                                                                                    |
| Complete List of Authors:       | Al-Ajlouni, Yazan; Columbia University Mailman School of Public Health<br>Al Ta'ani, Omar; University of Pittsburgh Medical Center Health System<br>Shamaileh, Ghaith; Tulane University School of Medicine<br>Mushasha, Rand; Charité Universitätsmedizin Berlin<br>Makarem, Nour; Columbia University Mailman School of Public Health<br>Duncan, Dustin; Columbia University Mailman School of Public Health |
| <b>Primary Subject Heading</b>: | Public health                                                                                                                                                                                                                                                                                                                                                                                                  |
| Secondary Subject Heading:      | Infectious diseases                                                                                                                                                                                                                                                                                                                                                                                            |
| Keywords:                       | COVID-19, Public health < INFECTIOUS DISEASES, SLEEP MEDICINE                                                                                                                                                                                                                                                                                                                                                  |
|                                 |                                                                                                                                                                                                                                                                                                                                                                                                                |

SCHOLARONE™  
Manuscripts

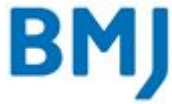

I, the Submitting Author has the right to grant and does grant on behalf of all authors of the Work (as defined in the below author licence), an exclusive licence and/or a non-exclusive licence for contributions from authors who are: i) UK Crown employees; ii) where BMJ has agreed a CC-BY licence shall apply, and/or iii) in accordance with the terms applicable for US Federal Government officers or employees acting as part of their official duties; on a worldwide, perpetual, irrevocable, royalty-free basis to BMJ Publishing Group Ltd ("BMJ") its licensees and where the relevant Journal is co-owned by BMJ to the co-owners of the Journal, to publish the Work in this journal and any other BMJ products and to exploit all rights, as set out in our [licence](#).

The Submitting Author accepts and understands that any supply made under these terms is made by BMJ to the Submitting Author unless you are acting as an employee on behalf of your employer or a postgraduate student of an affiliated institution which is paying any applicable article publishing charge ("APC") for Open Access articles. Where the Submitting Author wishes to make the Work available on an Open Access basis (and intends to pay the relevant APC), the terms of reuse of such Open Access shall be governed by a Creative Commons licence – details of these licences and which [Creative Commons](#) licence will apply to this Work are set out in our licence referred to above.

Other than as permitted in any relevant BMJ Author's Self Archiving Policies, I confirm this Work has not been accepted for publication elsewhere, is not being considered for publication elsewhere and does not duplicate material already published. I confirm all authors consent to publication of this Work and authorise the granting of this licence.

Abstract Word Count: 268  
Manuscript Word Count: 4897

The Effects of the COVID-19 Pandemic on Sleep Health Among Middle Eastern and North African (MENA) Populations: A Systematic Review of the Literature

Yazan A. Al-Ajlouni, MPhil<sup>1,2</sup>  
Omar Al Ta'ani, MD<sup>3</sup>  
Ghaith Shamaileh<sup>4</sup>  
Rand Mushasha, BDS<sup>5</sup>  
Nour Makarem, PhD<sup>2</sup>  
Dustin T. Duncan, ScD<sup>2</sup>

1. New York Medical College School of Medicine, Valhalla, New York, 10595, USA
2. Department of Epidemiology, Columbia University Mailman School of Public Health, New York, NY 10032, USA
3. University of Pittsburgh Medical Center, Pittsburgh, Pennsylvania, 15260, USA
4. Tulane University School of Medicine, New Orleans, LA 70112
5. Charité – Universitätsmedizin Berlin Charitéplatz 1, 10117 Berlin, Germany

Correspondence to: Yazan A. Al-Ajlouni, MPhil. New York Medical College School of Medicine, Valhalla, New York, USA 10595. Email: [alajlouni.yazan@gmail.com](mailto:alajlouni.yazan@gmail.com); Tel: +1 - 914 - 484 - 1014

## Abstract

**Objectives:** This study sought to conduct a systematic review of the literature on the impact of the COVID-19 pandemic on sleep health among Middle Eastern and North African (MENA) populations, understudied geographic regions including with regards to sleep health.

**Setting:** A systematic literature search of studies published from inception to March 27<sup>th</sup> 2022 was conducted on multiple databases using developed keywords

**Participants: Studies were included if** they (1) investigated one or more aspects/dimensions of sleep health as an outcome (e.g., sleep duration, sleep quality, sleep problems); (2) measured the impact of a COVID-19 pandemic-related domain (e.g., impact of quarantine, work from home, lifestyle changes, etc.); (3) focused on at least one MENA region population; (4) were peer reviewed; (5) included  $\geq 100$  participants; (6) were written in English; (7) had full-text article publicly available.

**Primary and secondary outcomes measured:** Primary outcomes were sleep duration, sleep quality and sleep problems

**Results:** In line with PRISMA guidelines, 164 studies were included for data extraction. The Newcastle-Ottawa (NOS) scale for cross-sectional studies was used to assess the quality of the studies. Overall, the COVID-19 pandemic significantly impacted sleep duration, sleep quality, and presence and severity of sleep disorders in MENA populations, including adults, children, students, healthcare workers, and people with chronic illnesses. The directionality and strength of associations, as well as the determinants of sleep health, varied by sub-populations.

**Conclusions:** Longitudinal studies are needed to understand the longer-term impact of the COVID pandemic on the sleep health of MENA populations. Sleep health interventions and policy measures should be tailored to the need of each sub-population.

**Trial registration number:** PROSPERO registration number: CRD42022321128.

**Keywords:** COVID-19, Sleep Health, Middle East, Health behaviors, Pandemic

## Introduction

The COVID-19 pandemic, which was announced as a Public Health Emergency of International Concern on 30 January 2020, and a pandemic on 11 March 2020, continues to affect people's lives around the globe. Given the nature of transmission of the SARS-CoV-2 virus, in addition to lack of medication or vaccines in the early response of the pandemic, many of the public health interventions to prevent the transmission focused on physical distancing. Such measures included quarantine and lock-down orders. In turn, this affected people's ability to do many social and physical activities, hence significantly impacting people's 24-h behavioral patterns. Further, pandemic-related stress also contributed to abrupt changes in lifestyle behaviors.<sup>1,2</sup> For instance, Park et al., reported that COVID-19 has had a negative impact on healthy and active lifestyles, as well as mental health and quality of life, among a sample of adults in South Korea.<sup>3</sup>

Research in the literature is demonstrating that among the many health outcomes and health behaviors that may be affected by the pandemic is sleep health.<sup>4-8</sup> Prior studies among various populations have shown that the pandemic affected a variety of sleep health domains, including sleep quality,<sup>9-11</sup> sleep duration,<sup>12,13</sup> and sleep disorders.<sup>14,15</sup> For instance, in a longitudinal study in Spain, Martínez-de-Quel reported that perceived sleep problems significantly increased following the onset of the pandemic.<sup>16</sup> Similarly, among 400 students and university administration staff workers in Italy, the prevalence of insomnia increased from 24% prior to the pandemic to 40% during the pandemic. Similarly, difficulties in sleep initiation among the same sample increased from 15% to 42% from before to during the pandemic.<sup>17</sup> A systematic review conducted in July 2020 showed that the prevalence of sleep problems during the COVID-19 pandemic is high and affects approximately 40% of people from the general and health care populations.<sup>18</sup> In addition to the observed trend in sleep health outcomes, the pandemic may have exacerbated a number of stressors that can directly increase poor sleep health. For instance, research among several global populations has shown an increase in intimate partner violence (IPV) due to lockdown measures, as well as economic and psychological stress brought about by the pandemic.<sup>19-21</sup> In turn, IPV has been linked with poor sleep quality and sleep disturbances among different populations.<sup>22,23</sup>

Among Middle Eastern and North African (MENA) populations, the burden of non-communicable diseases has drastically increased from 1990 to 2010.<sup>24</sup> The epidemiological profile of Middle Eastern countries closely resembles that of countries in western Europe, the USA, and Canada, with health loss from most non-communicable diseases, such as CVD and cancer, increasing over the past 20 years.<sup>24</sup> However, Middle Eastern populations are faced with multiple challenges when attempting to deal with such an epidemiological profile. Indeed, political turmoil, conflict, and corruption within states have led to challenges in implementing policies and laws, as well as adhering to them on a population-level.<sup>25</sup> Additionally, while Middle Eastern populations are facing an epidemiological challenge similar to that of the developed world, they continue to be understudied in public health research including sleep health research. In part, this is due to Arab countries having weak health information systems,<sup>26,27</sup> which limits data availability and produces major challenges for sound research and evidence-based policy making.

1  
2  
3 In addition, MENA countries epidemiological profile is characterized by high burden of  
4 psychosocial problems, including depression and anxiety.<sup>24</sup> Noncommunicable diseases and  
5 psychosocial problems, among other health outcomes, are consistently associated with sleep  
6 health.<sup>28-32</sup> Consequently, this exacerbation in poor sleep health that may be brought about by the  
7 pandemic can increase the risk of other undesirable health outcomes among populations. This  
8 issue is of increased urgency in areas with underdeveloped health research infrastructure where  
9 there continues to be lack of full understanding of the health of the population, as is the case in  
10 the MENA region.  
11  
12

13  
14 Given the evident impact the pandemic had on sleep health worldwide, as well as the well-  
15 documented association between sleep health and the leading causes of morbidity and mortality,  
16 it is important to understand this association among Middle Eastern populations. This systematic  
17 review sought to investigate the association between COVID-19 induced national lockdowns and  
18 different domains of sleep health among MENA populations. To the best of our knowledge, this  
19 is the first systematic review investigating sleep health among Middle Eastern populations in the  
20 context of COVID-19. Additionally, and while there are several reviews examining sleep health  
21 domains in developed countries,<sup>33, 34</sup> there continues to be a lack of reviews studying sleep health  
22 in MENA countries, which collectively represent ~600 million of the world population. In fact, this  
23 systematic review would be the first to summarize the literature on the sleep health of MENA  
24 populations, filling an important gap in the literature.  
25  
26  
27  
28  
29  
30  
31  
32  
33  
34  
35  
36  
37  
38  
39  
40  
41  
42  
43  
44  
45  
46  
47  
48  
49  
50  
51  
52  
53  
54  
55  
56  
57  
58  
59  
60

## Methods

A systematic literature search was performed in accordance with PRISMA (Preferred Reporting Items for Systematic Reviews and Meta-Analyses) guidelines.<sup>35</sup> On March 27th, 2022, we conducted a systematic literature review on five different databases, namely PubMed, MEDLINE, Embase, CINAHL, and Web of Science. A set of specific keywords and MeSH terms was developed and is shown in supplementary table S1. The protocol of this systematic review is registered with PROSPERO (international prospective register of systematic reviews) with the ID CRD42022321128.

### *Search Strategy and Selection Criteria*

The authors developed a set of keywords relevant to the research question and the population investigated. Boolean operators were used to ensure full inclusion of words within the keywords used. Using Endnote referencing software, retrieved articles were entered and duplicates were identified and removed. Following that, articles were entered into Rayyan, a free web-tool for screening articles for systematic reviews. As shown in figure 1, title and abstract screening was conducted by two investigators (OT and YAA) independently. Next, full-text articles were accessed and screened in more depth. Conflicts were solved by discussion upon the conclusion of the screening process. The articles included were deemed eligible against the following criteria: (1) investigated an aspect sleep health as an outcome of interest (e.g., sleep duration, quality and presence of a sleep problem or disorder); (2) investigated a domain related to the COVID-19 pandemic induced lifestyle changes (e.g., lockdown, online schooling, etc.); (3) focused on at least one MENA population (supplementary table S2 includes a list of all MENA countries included); (4) were peer reviewed; (5) sample size  $\geq 100$  participants (6) were written in English; (7) had full-text article publicly available. Similarly, articles were excluded if they met at least one of the following: (1) were not written in English; (2) were not peer-reviewed; (3) did not have full-text available; (4) were systematic or narrative review in design. Where multiple articles reported data from the same dataset, we selected the article with the largest numbers of variables included and excluded the other articles as duplicates. Finally, there were no restrictions on the nature of data reported and both qualitative and quantitative studies were included in this review. Of note, prior to conducting our systematic search, an initial literature search was conducted by the authors to identify systematic reviews of sleep in relation to COVID-19 pandemic.

### *Data Extraction*

Data extraction was done in accordance with a tabulated form. Two reviewers (OT and YAA) collectively performed the data extraction into a template table. Conflicts were resolved through a discussion and where necessary, a third reviewer. Data was categorized based on sub-populations identified, including adults, children, healthcare workers, students, and people with chronic illnesses. Other dimensions collected for each study included: (1) the first author and year of publication (e.g., reference); (2) location of the study (city and/or country); (3) study population of interest; (4) study sample size; (5) study design; (6) sleep health measurement tool; (7) sleep health domains; (8) main findings summarized.

### *Data Presentation*



1  
2  
3 All data extracted from identified studies were presented in a tabulated form organized according  
4 to the different sub-populations identified among MENA populations. This included: 1) adults; 2)  
5 children; 3) healthcare workers; 4) students; 5) people with chronic illnesses. Main summary  
6 findings were presented in the tables, in addition to identifying specific factors that were  
7 associated with poor sleep health outcomes.  
8  
9

### 10 *Quality Appraisal*

11  
12 Given that the majority of the studies identified were cross-sectional in design, The Newcastle-  
13 Ottawa scale (NOS) was used to assess the quality of the studies. Two reviewers (YAA and OT)  
14 independently assessed the risk of bias in all cross-sectional studies. Where necessary, conflicts  
15 in scoring were resolved by discussion. Only cross-sectional studies were scored against the  
16 NOS, yielding a total of 157 studies for risk assessment. The NOS was developed to assess the  
17 quality of nonrandomized studies according to different domains of the studies, including the  
18 study's design, content, and ease of use directed to the task of incorporating the quality  
19 assessments in the interpretation of meta-analytic results. In accordance with the NOS, the  
20 studies were scored against 7 different categories, including (1) selection (4 sub-categories, 4  
21 stars maximum); (2) comparability (1 sub-category; 2 stars maximum); (3) outcome (2 sub-  
22 categories; 3 stars maximum). The full list of adapted questions from the NOS is attached as a  
23 supplementary file. Additionally, the results of the NOS assessment for our included cross-  
24 sectional studies are shown in supplementary table S3.  
25  
26  
27

### 28 *Ethical Approval*

29  
30  
31 Ethical approval for this specific systematic review is not applicable since data utilized was  
32 collected from previously published research in the literature. All studies included in this review  
33 received ethical approval prior to data collection by their primary investigator.  
34

### 35 *Patient and Public Involvement*

36  
37 Patients and public were not involved in the design and conduct of this research  
38  
39  
40  
41  
42  
43  
44  
45  
46  
47  
48  
49  
50  
51  
52  
53  
54  
55  
56  
57  
58  
59  
60

## Results

### 3.1. Search results

As illustrated in figure 1, the systematic literature search yielded 683 studies from PubMed, 152 studies from MEDLINE, 285 studies from Embase, 63 studies from CINAHL, and 110 studies from Web of Science, resulting in a total of 1,293 studies. After removing duplicates (n = 338), 955 articles were screened independently by two investigators for title and abstract to determine relevance to our research question. This step excluded an additional 721 articles either because they did not investigate sleep health as one of the outcomes (n = 535), did not include people from the Middle East, (n = 153), or were not peer reviewed (n = 33). After this step, two independent investigators performed full-text screening on 234 potentially relevant articles. A total of 70 studies were excluded at this stage, mainly due to studies with unavailable full-text article (n=14), studies not reporting sleep health as an outcome (n=24), studies conducted explicitly outside the Middle East (n=24) or had a sample size of less than 100 participants (n = 8). As a result, a total of 164 articles were included in this review.

### 3.2. Study characteristics

The sample size of all included studies (n=164) ranged from 103 to 20,697 participants. Table S4 in the supplementary file presents a full list of all included studies and their extracted data. Furthermore, studies included were conducted across 17 Middle Eastern countries, including Turkey (n=44), Saudi Arabia (n=33), Iran (n=16), Israel (n=12), Jordan (n=12), Egypt (n=10), Oman, (n=6), United Arab Emirates (n=6), Lebanon (n=6), Kuwait (n=4), and Qatar (n=2). Only one study was conducted in each of the following countries: Bahrain, Palestine, Cyprus, and Iraq. Additionally, 11 studies included samples from multiple countries at once, including Syria, Yemen, Iraq, and others.

### 3.3. Quality appraisal

Most studies in this review were cross-sectional in design (n=156). All other study designs were longitudinal (n=8). Table S3 in the supplementary file presents the full NOS results for all studies assessed for bias, determined using the NOS protocol outlined in the Methods section. Most studies were moderate in quality.

### 3.4. Sleep health outcomes by sub-population

Data from all eligible studies was organized according to population type, with a total of five sub-populations. These included studies focusing on adults in the general population (n=74), healthcare workers (n=47), students (n=21), children (n=15), and people with chronic illnesses (n=7). For all populations, qualitative data synthesis was conducted with a focus on three main domains: sleep duration, sleep quality, and sleep disorders.

#### 3.4.1. Adults

1  
2  
3 Across the studies conducted among adults (n=74), the sample size ranged from 103 to 14,171  
4 participants.  
5

### 6 *Sleep Duration*

7  
8 Studies consistently reported that the pandemic negatively impacted the sleep duration of Middle  
9 Eastern adults<sup>36-44</sup>. In a global study including 5896 adults from 11 MENA countries, 49.6% of  
10 participants reporting that they were sleeping less than 7 hours and 53.2% reporting 10 or more  
11 hours of sleep.<sup>36</sup> In Egypt, 23.1% of adults younger than 30 years old reported inadequate  
12 sleeping (< 6h/day).<sup>45</sup> In terms of determinants of sleep duration among adults, data from Jordan  
13 revealed an increased burden of short sleep duration among males compared to females.  
14 Similarly, participants with higher education levels reported decreased daytime sleeping hours.<sup>46</sup>  
15 In terms of relationship status, individuals who reported being single had significantly increased  
16 amount of sleep compared to married individuals.<sup>46</sup>  
17  
18  
19

### 20 *Sleep Quality*

21  
22 Sleep quality (SQ) was altered for both COVID-19 patients and healthy individuals.<sup>47</sup> The  
23 Pittsburgh Sleep Quality Index (PSQI) score during lockdown was predominantly influenced by  
24 sleep-onset latency, sleep efficiency, and total sleep time.<sup>48</sup> Factors associated with reduced SQ  
25 included changes in sleeping habits, anxiety, fear driven by COVID-19 news and lack of treatment  
26 knowledge, female gender, monthly income, isolation,<sup>49</sup> perceived income, hours spent outdoors,  
27 the number of familiar people with COVID-19, and history of depression.<sup>50</sup>  
28  
29  
30

### 31 *Sleep Problems*

32  
33 Most families reported disrupted sleep patterns.<sup>51</sup> When quarantine period started in Saudi  
34 Arabia, 1/5 experienced new-onset nightmares, more significant among females.<sup>52</sup> In a global  
35 cross-sectional study including a number of Middle Eastern countries, around 33.3% of  
36 respondents reported feeling lazy and less energized during the pandemic, as opposed to 4.7%  
37 before the pandemic.<sup>53</sup> The prevalence of insomnia, anxiety, depression, and obesity increased  
38 with increasing phone screen time among university students. Of all countries, Iran reported the  
39 highest prevalence of insomnia among adults (55.2%).<sup>47, 54</sup> Finally, in a Turkey-based study  
40 among pregnant women, mild sleepiness was found in 88.2% of participants (n = 356), while  
41 severe sleepiness was reported in 11.8% of the same sample.<sup>55</sup>  
42  
43  
44

### 45 *3.4.2. Children*

46  
47 A total of 15 studies assessed sleep health among children. The sample size of studies ranged  
48 from 309 to 20,697 participants.  
49

### 50 *Sleep Duration*

51  
52  
53 Most studies in the literature reported a change in the sleeping duration among children, with  
54 varying directions of change (e.g., increased, or decreased duration). In Saudi Arabia and Jordan,  
55 decreased sleep was reported among children's populations.<sup>56, 57</sup> Moreover, sleep duration in  
56  
57  
58  
59  
60

1  
2  
3 Israel increased for 13.4% of participants, decreased for 51.1%, and remained unchanged for  
4 35.1%. Sleeping less than seven hours decreased from 41.4% to 5.4%, while sleeping more than  
5 10 hours significantly increased from 4.8% to 49.7%.<sup>58</sup> In Iran 13.4% of children, mostly from  
6 urban areas, reported that they had 5 or fewer hours of sleep.<sup>59</sup>  
7

### 8 *Sleep Quality*

9

10 In Tukey, 61.5% of children experienced sleeping changes due to the pandemic.<sup>60</sup> Almhizai et al.,  
11 demonstrated that older participants woke up more frequently during their sleep compared to  
12 children.<sup>61</sup> In Israel, 41.4% of children developed sleeping difficulties.<sup>62</sup> Similarly, in another Israeli  
13 study, 60% of mothers reported that their child's sleeping patterns had changed drastically and  
14 reported higher levels of anxiety traits associated with sleep changes.  
15  
16

### 17 *Sleep Problems*

18

19 Sleep disorders were reported in all studies among children. In Turkey, the prevalence of sleep  
20 disturbances among children was 55.5% and significantly associated with 6–8 years of age and  
21 poor family relationships. The most common sleep disturbances were bedtime resistance (51.9%)  
22 and sleep onset delay (61.4%).<sup>63</sup> Sleep disturbances were more common in children of parents  
23 who felt helpless, apprehensive, and frightened during the pandemic,<sup>63</sup> and children whose  
24 parents were divorced.<sup>61</sup> The direct effect of trauma scores on sleep problems, the direct effect  
25 of sleep problems on chronotype scores and on oppositional defiant disorder (ODD) symptom  
26 scores were significant.<sup>64</sup>  
27  
28  
29

### 30 *3.4.3. Healthcare workers*

31

32 A total of 47 studies assessed sleep health among healthcare workers in all Middle Eastern  
33 countries listed in the study characteristics, except Palestine, Cyprus, and Iraq. The sample size  
34 of studies ranged from 105 to 2,331 participants.  
35  
36

### 37 *Sleep Duration*

38

39 Sleep duration significantly decreased for HCWs in most countries, except Israel, where medical  
40 residents treating COVID-19 reported longer sleep duration.<sup>65</sup> In Egypt, both physicians on the  
41 front line and others were at risk of falling asleep, staying asleep, or sleeping excessively.<sup>66</sup>  
42 Furthermore, there was a statistically significant decrease in sleeping hours among HCWs with  
43 severe and extremely severe depression.<sup>67</sup> Those with higher levels of health anxiety related to  
44 COVID-19 were working more days weekly and had lower sleeping hours.<sup>68</sup> Female sex, age ≤30  
45 years, attending emergency and night shifts, watching/reading COVID-19 news ≥2 h/day, and not  
46 getting emotional support from family, society, and hospitals were associated with a high  
47 likelihood of inadequate sleeping HCW in Egypt.<sup>69</sup>  
48  
49  
50

### 51 *Sleep Quality*

52

53 Most studies reported poor and reduced SQ, as measured by the PSQI, with poor sleep quality  
54 prevalence ranging from 48.4%<sup>70</sup> to 96.1%.<sup>71</sup> Both, front line HCWs and non-front line HCW  
55  
56  
57  
58  
59  
60

1  
2  
3 reported poor SQ and/or had moderate-severe stress.<sup>72</sup> In Saudi Arabia poor SQ levels were  
4 highest among front line HCWs (emergency departments, intensive care units, and wards).<sup>73</sup> The  
5 most negatively scored components of SQ included sleep latency, duration, and efficacy. Poor  
6 SQ was more prevalent among females, nurses, hospital workers, frontline workers, individuals  
7 with <5 years of work experience, those with low social support, and individuals with increased  
8 traumatic stress levels.<sup>74</sup>  
9  
10

### 11 *Sleep Problems*

12  
13 HCWs between 31-40 years-old treating COVID-19 were at higher risk of severe insomnia,  
14 compared to those above 40 years-old.<sup>75</sup> In Turkey, insomnia incidence was 1.5 times higher for  
15 HCWs in the frontline and significantly higher amongst those working in the “area of final  
16 diagnosis”.<sup>76</sup> In a tertiary care hospital in Oman, the majority of HCWs (60.2%) aged  
17  $34.8 \pm 5.7$  years and with less working experience ( $11.9 \pm 5.9$  years) reported clinical insomnia  
18 during the pandemic.<sup>77</sup> Mean Insomnia Severity Index score in Turkey was significantly higher  
19 among HCWs working in COVID-19 clinics and intensive care units and among nurses.<sup>74</sup>  
20  
21  
22

### 23 3.4.4. *Students*

24  
25 A total of 21 studies with sample sizes ranging from 152 to 17,008 participants assessed sleep  
26 health among students.  
27

### 28 *Sleep Duration*

29  
30  
31 Among a large cohort of medical and science university students in Jordan, 44.2% of participants  
32 ( $n = 1019$ ) reported reduction in their sleeping hours.<sup>78</sup> Another study reported a statistical  
33 increase of total sleeping time from  $6.6 \pm 2.3$  h/day to  $8.3 \pm 2.7$  h/day.<sup>79</sup> In Israel, a significant  
34 reduction in sleep duration from lockdown to post-lockdown period for workdays and weekends  
35 was reported.<sup>80</sup>  
36  
37

### 38 *Sleep Quality*

39  
40 Furthermore, 85.55% of students reported poor SQ and 67.9% were females. It was found that  
41 sleep disturbance and daytime dysfunction were poorer in students with higher BMI ranges.<sup>81</sup> In  
42 Saudi Arabia, 25.9% of a sample of students reported poor SQ, 22.7% felt tired during the day,  
43 9.3% had nightmares and 5.2% had poor dreams.<sup>82</sup> Furthermore, extended quarantine negatively  
44 affected SQ of three-quarters of the undergraduate students in Jordan, with poor sleep quality  
45 reported in nearly half of the same sample.<sup>83</sup> Additionally, about a third of the same sample  
46 reported sleeping late and waking up more frequently.<sup>83</sup>  
47  
48

### 49 *Sleep Problems*

50  
51  
52 In Saudi Arabia, 22% of students had trouble falling asleep, 17.9% waking up during the night,  
53 and 8.8% waking up early in the morning.<sup>82</sup> Students reported a statistically high level of insomnia  
54 with a high level of depression, anxiety, and perceived stress. Undergraduate students reported  
55 statistically more insomnia symptoms with a lower level of psychological resilience.<sup>82</sup>  
56  
57  
58  
59  
60

1  
2  
3 Furthermore, lockdown in Turkey led to sleeping later, waking up frequently and failing to fall  
4 asleep.<sup>84</sup> In Saudi Arabia, medical students reported Narcolepsy (51.6%), insomnia (31.5%), and  
5 Circadian Rhythm Sleep Disorder (22.4%) as the most prevalent sleep disorders.<sup>85</sup> Furthermore,  
6 a statistically significant increase of night sleep interruptions was reported during COVID-19. In  
7 Jordan, students experienced increased insomnia, shallow sleep, nightmares, or insufficient  
8 sleep, and these disorders were reported in significantly more females than males.<sup>86</sup>  
9  
10

### 11 3.4.5. *People with chronic illnesses*

12  
13 A total of 7 cross-sectional design studies assessed sleep health among the population with  
14 special conditions. The sample size of studies ranged from 145 to 2,223 participants. Those  
15 studies focused on a variety of chronic illnesses, including epilepsy (n=1), neurological conditions  
16 (n=1), cancer (n=1), musculoskeletal diseases (n=1), spine illnesses (n=1), rhematic disease (RD)  
17 (n=1), and multiple sclerosis (MS) (n=1).  
18  
19

#### 20 *Sleep Duration*

21  
22 In Saudi Arabia, 71.2% of patients with epilepsy experienced significant changes in their sleep.<sup>87</sup>  
23 <sup>88</sup> Almost half of them had been seizure-free in the three months prior to the pandemic.  
24 Furthermore, 9.6% of patients surveyed reported more sleep than usual, 2.6% reported less  
25 sleep, and 0.6% reported intermittent sleep.<sup>87, 88</sup>  
26  
27

#### 28 *Sleep Quality*

29  
30 Quality of sleep among different patient groups, as measured by PSQI, was affected during the  
31 pandemic. In Turkey, for patients with musculoskeletal pain, PSQI revealed a weak correlation  
32 with pain levels in all body parts.<sup>89</sup> Quality of sleep was found to be bad for 58.7% cancer  
33 patients.<sup>90</sup> Depression, anxiety, and defective SQ levels for pregnant women (mean age was  
34 30.17 ± 5.47 years) who were previously in quarantine was significantly higher.<sup>91</sup> SQ among  
35 patients with MS patients was significantly impaired during the pandemic too.<sup>92</sup>  
36  
37  
38

#### 39 *Sleep Problems*

40  
41 Although patients reported different experiences, a certain degree of sleep disorders was reported  
42 among almost all patients. In Jordan, Athamneh et al., reported that 37.5% of patients with chronic  
43 headaches reported changes in sleeping patterns during the COVID-19 pandemic.<sup>93</sup> Finally, the  
44 frequency of sleep problems in patients with RD was significantly higher than that of non-patients,  
45 but significantly lower than that reported in hospital workers.<sup>94</sup>  
46  
47  
48  
49  
50  
51  
52  
53  
54  
55  
56  
57  
58  
59  
60

## Discussion

This systematic review of the literature explored the impact of the COVID-19 pandemic on sleep health among populations in the Middle East. To the best of our knowledge, this is the very first systematic review on sleep health among any Middle Eastern population, and one of the first reviews to pool evidence on sleep health during the ongoing COVID-19 pandemic. The findings of our systematic review suggest that across all sub-populations (e.g., adults, children, students, healthcare workers, and people with chronic illnesses), the COVID-19 pandemic had a drastic negative impact on sleep duration, sleep quality, and prevalence of sleep disorders.

Sleep duration was negatively impacted in all populations investigated, whereby the prevalence of short or long sleep seems to have increased. Similarly, sleep quality in all populations decreased drastically. Studies reported a consistent association between sociodemographic variables (e.g., being single,<sup>44, 95-97</sup> low education levels,<sup>95, 97-101</sup> unemployment during the pandemic,<sup>102</sup> female gender,<sup>49, 96</sup> low social support<sup>74, 103</sup>) and poorer sleep quality. Furthermore, with regards to sleep problems, insomnia was the most reported sleeping problem across studies. Higher prevalence of insomnia and other sleep disorders were observed among younger participants, those with a diagnosed mental disorder, unmarried participants, and undergraduate students.<sup>104</sup> Such findings suggest that psychological stressors, which may have been exacerbated by the pandemic,<sup>105, 106</sup> are associated with sleep problems and contributed to its high prevalence during the pandemic. Moreover, women reported higher rates of insomnia compared to men. Interestingly, there was an observed positive association between lockdown duration and the prevalence of insomnia. Finally, among people with chronic illnesses, reversal of sleeping pattern (e.g., initiating sleep after sunrise) was the most frequent change in sleep habits.<sup>87</sup>

When comparing different sub-populations in this study, HCWs' sleep health was the most impaired during the pandemic compared with other sub-populations. While in other populations sleep duration was affected with no specific trend, healthcare workers demonstrated predominantly decreased sleep duration. Furthermore, in addition to reduced sleep duration, front line HCWs reported the lowest SQ. Among HCWs, being on the front-line, being younger, and having less experience working were all associated with increased insomnia prevalence. Nurses experienced emotional exhaustion, and burnout levels increased in line with insomnia.<sup>107</sup> Long shifts, busy working conditions, and less sleep disturbed their sleeping patterns and made HCWs feel tired.

Our findings are consistent with prior research in other populations.<sup>7, 18, 108, 109</sup> For instance, Jahrami et al., reported an increased burden of sleep problem during the COVID-19 pandemic in early 2021, with approximately 40% of the general population reporting sleep problems.<sup>18</sup> Similarly, and consistent with our findings among Middle Eastern front-line workers, a meta-analysis conducted by Salari et al., showed that healthcare workers are more vulnerable to sleep disturbances during the pandemic.<sup>109</sup> This finding was associated with increased workplace stress and was shown in both nurses and physicians.<sup>109</sup>

1  
2  
3 The findings of this systematic review are important for public health policy and for directing  
4 intervention measures. Given that sleep is a risk factor for the leading causes of death including  
5 CVD, hypertension, diabetes, obesity, etc., interventions that promote sleep health are of high  
6 public health relevance, particularly in the current pandemic era. Such interventions can include  
7 social and administrative support, workplace interventions,<sup>110</sup> providing education that  
8 emphasizes the importance of sleep behavior, encouraging promoting behaviors and relaxation  
9 strategies. The differences in impact and severity of sleep health problems among different sub-  
10 populations, as identified in this study, suggest that policies and interventions should be tailored  
11 to each population. Some authors have already suggested emergency management measures  
12 that should be taken to improve the quality of sleep in FLHCWs during a pandemic: strengthen  
13 exercise intervention, psychological counseling, drug intervention treatment strategies if  
14 necessary, and other.<sup>111</sup> Similarly, sleep problems in childhood are linked with impaired motor  
15 and cognitive skills, as well as with difficulties in academic activities, emotional regulation, quality  
16 of life, growth, body composition, and immune function.<sup>112</sup> A daily routine is a fundamental aspect  
17 of children's development of healthy behaviors and adequate energy levels. Interventions that  
18 focus on health promotion and advocating for healthy sleeping patterns among children,  
19 especially as it relates to other health behaviors development, should be implemented.  
20  
21  
22  
23  
24

25 In addition to intervention efforts to address poor sleep among MENA populations, there is a  
26 strong need to understand barriers to adequate sleep among each sub-population. The current  
27 literature provides evidence regarding barriers to adequate sleep focuses primarily on western  
28 populations. This includes environmental factors (e.g., decreased green space),<sup>113, 114</sup> social  
29 factors (e.g., decreased social cohesion,<sup>115</sup> decreased safety),<sup>116-118</sup> and ambient factors (e.g.,  
30 increased air pollution,<sup>119-123</sup> increased noise).<sup>124</sup> However, there continues to be a lack of data on  
31 this topic in the MENA region despite high prevalence of poverty, gender inequality, political  
32 turmoil, violence, and other factors that are strongly linked with PTSD and other psychological  
33 factors, which are known to affect sleep.<sup>125, 126</sup> The unique social, structural, and environmental  
34 context of the MENA region, in addition to the demonstrated exacerbation of poor sleep health by  
35 the pandemic, highlights why increased efforts to understand and address sleep health,  
36 particularly post-pandemic, is relevant for MENA populations.  
37  
38  
39  
40

### 41 **Strengths, limitations, and future research**

42  
43 This review is the first systematic review of the literature regarding the effects of COVID-19  
44 pandemic on the sleep health of Middle Eastern populations. Additionally, this paper provides a  
45 robust qualitative synthesis of data to include a wide scope of research on the topic published to  
46 date. This review covers a wide range of outcomes (e.g., any study that reported a sleep health  
47 related domain), includes only peer-reviewed articles as the source of information of high quality,  
48 and incorporates a wider scope of studies and populations. Despite those strengths, this study is  
49 not without noteworthy limitations that must be considered when interpreting our results. Firstly,  
50 most included studies are cross-sectional in design, which poses an intrinsic limitation given the  
51 design. For instance, it is not possible to establish causation with such studies. Additionally, most  
52 of the studies utilize self-reported surveys. Given the rapidly evolving situation with the pandemic  
53 (e.g., lockdown measures, changes in epidemiology of COVID-19, etc.), this approach seemed  
54  
55  
56  
57  
58  
59  
60



1  
2  
3 the most suitable to collect data rapidly. However, this introduces several limitations including  
4 self-selection bias, recall bias, and social desirability bias.<sup>127-129</sup> Another limitation specific to the  
5 design of this review is that it excludes studies conducted in languages other than English.  
6 Moreover, quarantine requirements differed across different countries within the MENA region,  
7 which could have had varying effects on the health of the population. This variation was  
8 challenging to capture and control for within our review and must be a consideration when  
9 interpreting our results.  
10  
11

12 Furthermore, studies included in this review utilized different methods for assessing sleep health,  
13 which varied across populations. Mainly, this included subjective measures, including a variety of  
14 tools to measure sleep health (e.g., Pittsburgh Sleep Quality Index, Insomnia Severity Index). In  
15 turn, this makes it challenging to compare results between different studies and different  
16 populations. Additionally, it is important to note that no study included in this review utilized  
17 objective tools to measure sleep health (e.g., actigraphy), and many studies utilized tools that do  
18 not have demonstrated validity or reliability in the context of sleep health measurement (e.g.,  
19 surveys developed by authors of the study). Consequently, future research should focus on  
20 utilizing objective tools to measure sleep health. If not feasible, subjective tools with demonstrated  
21 reliability and validity are preferred. Finally, future research should continue to understand the  
22 long-term impacts of the abrupt change in lifestyle brought about by the COVID-19 pandemic on  
23 Middle Eastern populations.  
24  
25  
26  
27  
28  
29  
30  
31  
32  
33  
34  
35  
36  
37  
38  
39  
40  
41  
42  
43  
44  
45  
46  
47  
48  
49  
50  
51  
52  
53  
54  
55  
56  
57  
58  
59  
60

## Conclusions

This review sought to review and investigate the evidence between COVID-19 induced lockdowns on sleep health among different populations in the MENA region. Given high burden of poor sleep that has been exacerbated by the COVID pandemic, there is a strong need for tailored interventions to improve sleep health. Finally, and considering that Middle Eastern populations continue to be severely understudied in public health, future research should continue to investigate and explore the impact of the COVID-19 pandemic on public health in The Middle East, including longitudinal studies utilizing objective measures to assess the impact of sleep on the health of MENA populations across their lives.

For peer review only

## Declarations

### *Ethics approval and consent to participate*

Not Applicable

### *Consent for publication*

Not Applicable

### *Availability of data and materials*

All data generated or analyzed during this study are included in this published article and its supplementary information files

### *Competing interests*

The authors declare that they have no competing interests

### *Funding*

No funding to declare

### *Authors' contributions*

All authors contributed to revise work for important intellectual content, gave the final approval of the version to be published, and agreed on all aspects of the work, especially concerning its accuracy and integrity. Further specific activities have been distributed as follows: Y.A.A conceived the hypothesis. Y.A.A and O.T designed the studies. Y.A.A, O.T. and R.M performed the article screening and data extraction. Y.A.A, O.T and G.S performed the quality assessment. All authors (Y.A.A., O.T., G.S., R.M., N.M., D.T.,) had access to data and verified it, and contributed feedback to drafts of the manuscript. Y.A.A and O.T shaped the manuscript with input from the entire team.

### *Acknowledgements*

We would like to thank the authors of the respective studies included in this review, as well as the participants of those studies.

1  
2  
3 **Figure Legends**  
4

5 **Fig. 1.** Preferred Reporting Items for Systematic Reviews and Meta-Analyses (PRISMA) study  
6 selection flow diagram outlining the literature review process when searching for articles on  
7 PubMed and Web of Science  
8  
9

10  
11  
12  
13  
14  
15  
16  
17  
18  
19  
20  
21  
22  
23  
24  
25  
26  
27  
28  
29  
30  
31  
32  
33  
34  
35  
36  
37  
38  
39  
40  
41  
42  
43  
44  
45  
46  
47  
48  
49  
50  
51  
52  
53  
54  
55  
56  
57  
58  
59  
60

For peer review only

## References

1. Wang C, Pan R, Wan X, Tan Y, Xu L, Ho CS, et al. Immediate psychological responses and associated factors during the initial stage of the 2019 coronavirus disease (COVID-19) epidemic among the general population in China. *International journal of environmental research and public health*. 2020;17(5):1729.
2. Dossett ML, Fricchione GL, Benson H. A new era for mind–body medicine. *The New England journal of medicine*. 2020;382(15):1390.
3. Park K-H, Kim A-R, Yang M-A, Lim S-J, Park J-H. Impact of the COVID-19 pandemic on the lifestyle, mental health, and quality of life of adults in South Korea. *PLoS One*. 2021;16(2):e0247970.
4. Jahrami HA, Alhaj OA, Humood AM, Alenezi AF, Fekih-Romdhane F, AlRasheed MM, et al. Sleep disturbances during the COVID-19 pandemic: A systematic review, meta-analysis, and meta-regression. *Sleep Med Rev*. 2022;62:101591.
5. Yuksel D, McKee GB, Perrin PB, Alzueta E, Caffarra S, Ramos-Usuga D, et al. Sleeping when the world locks down: correlates of sleep health during the COVID-19 pandemic across 59 countries. *Sleep Health*. 2021;7(2):134-42.
6. Hisler GC, Twenge JM. Sleep characteristics of US adults before and during the COVID-19 pandemic. *Social Science & Medicine*. 2021;276:113849.
7. Alimoradi Z, Broström A, Tsang HWH, Griffiths MD, Haghayegh S, Ohayon MM, et al. Sleep problems during COVID-19 pandemic and its' association to psychological distress: A systematic review and meta-analysis. *EClinicalMedicine*. 2021;36:100916.
8. Lin YN, Liu ZR, Li SQ, Li CX, Zhang L, Li N, et al. Burden of sleep disturbance during COVID-19 pandemic: a systematic review. *Nature and Science of Sleep*. 2021;13:933.
9. Kocevskaja D, Blanken TF, Van Someren EJ, Rösler L. Sleep quality during the COVID-19 pandemic: not one size fits all. *Sleep medicine*. 2020;76:86-8.
10. Pinto J, van Zeller M, Amorim P, Pimentel A, Dantas P, Eusébio E, et al. Sleep quality in times of Covid-19 pandemic. *Sleep medicine*. 2020;74:81-5.
11. Gupta R, Grover S, Basu A, Krishnan V, Tripathi A, Subramanyam A, et al. Changes in sleep pattern and sleep quality during COVID-19 lockdown. *Indian journal of psychiatry*. 2020;62(4):370.
12. Kumari A, Ranjan P, Vikram NK, Kaur D, Sahu A, Dwivedi SN, et al. A short questionnaire to assess changes in lifestyle-related behaviour during COVID 19 pandemic. *Diabetes & Metabolic Syndrome: Clinical Research & Reviews*. 2020;14(6):1697-701.
13. Benham G. Stress and sleep in college students prior to and during the COVID-19 pandemic. *Stress and Health*. 2021;37(3):504-15.
14. Alimoradi Z, Broström A, Tsang HW, Griffiths MD, Haghayegh S, Ohayon MM, et al. Sleep problems during COVID-19 pandemic and its' association to psychological distress: A systematic review and meta-analysis. *EClinicalMedicine*. 2021;36:100916.
15. Peretti-Watel P, Alleaume C, Léger D, Beck F, Verger P, Group C. Anxiety, depression and sleep problems: a second wave of COVID-19. *General Psychiatry*. 2020;33(5).
16. Martínez-de-Quel Ó, Suárez-Iglesias D, López-Flores M, Pérez CA. Physical activity, dietary habits and sleep quality before and during COVID-19 lockdown: A longitudinal study. *Appetite*. 2021;158:105019.
17. Marelli S, Castelnuovo A, Somma A, Castronovo V, Mombelli S, Bottoni D, et al. Impact of COVID-19 lockdown on sleep quality in university students and administration staff. *Journal of neurology*. 2021;268(1):8-15.
18. Jahrami H, BaHammam AS, Bragazzi NL, Saif Z, Faris M, Vitiello MV. Sleep problems during the COVID-19 pandemic by population: a systematic review and meta-analysis. *J Clin Sleep Med*. 2021;17(2):299-313.

19. Moreira DN, da Costa MP. The impact of the Covid-19 pandemic in the precipitation of intimate partner violence. *International journal of law and psychiatry*. 2020;71:101606.
20. Agüero JM. COVID-19 and the rise of intimate partner violence. *World development*. 2021;137:105217.
21. Gosangi B, Park H, Thomas R, Gujrathi R, Bay CP, Raja AS, et al. Exacerbation of physical intimate partner violence during COVID-19 lockdown. *Radiology*. 2020.
22. Rauer AJ, El-Sheikh M. Reciprocal pathways between intimate partner violence and sleep in men and women. *Journal of Family Psychology*. 2012;26(3):470.
23. Sanchez SE, Islam S, Zhong Q-Y, Gelaye B, Williams MA. Intimate partner violence is associated with stress-related sleep disturbance and poor sleep quality during early pregnancy. *PloS one*. 2016;11(3):e0152199.
24. Mokdad AH, Jaber S, Aziz MIA, AlBuhairan F, AlGhaithi A, AlHamad NM, et al. The state of health in the Arab world, 1990–2010: an analysis of the burden of diseases, injuries, and risk factors. *The Lancet*. 2014;383(9914):309-20.
25. Guetat I. The effects of corruption on growth performance of the MENA countries. *Journal of Economics and Finance*. 2006;30(2):208-21.
26. Organization WH. Country health information systems: a review of the current situation and trends. Geneva: WHO. 2011.
27. Organization WH. Health systems priorities in the Eastern Mediterranean Region: challenges and strategic directions. 2004.
28. Jarasvaraparn C, Zlomke K, Vann NC, Wang B, Crissinger KD, Gremse DA. The relationship between sleep disturbance, quality of life and psychosocial functioning in pediatric patients with inflammatory bowel disease. *Annals of gastroenterology and digestive disorders*. 2018;1(1):9.
29. Gómez-Olivé FX, Rohr JK, Roden LC, Rae DE, von Schantz M. Associations between sleep parameters, non-communicable diseases, HIV status and medications in older, rural South Africans. *Scientific reports*. 2018;8(1):1-11.
30. Basnet S, Merikanto I, Lahti T, Männistö S, Laatikainen T, Vartiainen E, et al. Associations of common chronic non-communicable diseases and medical conditions with sleep-related problems in a population-based health examination study. *Sleep Science*. 2016;9(3):249-54.
31. Nowowiejska J, Baran A, Flisiak I. Mutual relationship between sleep disorders, quality of life and psychosocial aspects in patients with psoriasis. *Frontiers in Psychiatry*. 2021:1086.
32. Lies J, Mellor A, Jobson L, Drummond SP. Prevalence of sleep disturbance and its relationships with mental health and psychosocial issues in refugees and asylum seekers attending psychological services in Australia. *Sleep Health*. 2019;5(4):335-43.
33. Itani O, Jike M, Watanabe N, Kaneita Y. Short sleep duration and health outcomes: a systematic review, meta-analysis, and meta-regression. *Sleep medicine*. 2017;32:246-56.
34. Jike M, Itani O, Watanabe N, Buysse DJ, Kaneita Y. Long sleep duration and health outcomes: a systematic review, meta-analysis and meta-regression. *Sleep medicine reviews*. 2018;39:25-36.
35. Moher D, Liberati A, Tetzlaff J, Altman DG, Group\* P. Preferred reporting items for systematic reviews and meta-analyses: the PRISMA statement. *Annals of internal medicine*. 2009;151(4):264-9.
36. Abouzid M, El-Sherif DM, Eltewacy NK, Dahman NBH, Okasha SA, Ghozy S, et al. Influence of COVID-19 on lifestyle behaviors in the Middle East and North Africa Region: a survey of 5896 individuals. *J Transl Med*. 2021;19(1):129.
37. Al-Musharaf S. Prevalence and predictors of emotional eating among healthy young Saudi women during the COVID-19 pandemic. *Nutrients*. 2020;12(10):1-17.

38. Al-Saleh MM, Alamri AM, Alhefzi AA, Assiri KK, Moshebah AY. Population healthy lifestyle changes in Abha city during COVID-19 lockdown, Saudi Arabia. *Journal of family medicine and primary care*. 2021;10(2):809-15.
39. Abed Alah M, Abdeen S, Kehyayan V, Bougmiza IAP. The Impact of Changes in Work Arrangements During COVID-19 Pandemic on the Lifestyle of Qatar's Working Population. *Journal of Occupational & Environmental Medicine*. 2022;64(2):e53-e9.
40. Alghamdi AA, Alafif NO, Bahammam AS, Almuammar M, Alharbi NS, Alhefdhi NA, et al. Nightmares' Pattern and Predictors among a Saudi University Students during COVID-19 Pandemic. *International Journal of Environmental Research and Public Health*. 2022;19(3).
41. Alharbi AS, Alshahrani SM, Alsaadi MM, Al-Jahdali HH, Wali SO, BaHammam AS. Sleep quality and insomnia during the covid-19 lockdown among the saudi public. *Saudi Medical Journal*. 2021;42(4):384-90.
42. Cheikh Ismail L, Hashim M, Mohamad MN, Hassan H, Ajab A, Stojanovska L, et al. Dietary Habits and Lifestyle During Coronavirus Pandemic Lockdown: Experience From Lebanon. *Frontiers in nutrition*. 2021;8:730425.
43. Galali Y. The impact of COVID-19 confinement on the eating habits and lifestyle changes: A cross sectional study. *Food Sci Nutr*. 2021;9(4):2105-13.
44. Hammouri H, Almomani F, Abdel Muhsen R, Abughazzi A, Daghmash R, Abudayah A, et al. Lifestyle Variations during and after the COVID-19 Pandemic: A Cross-Sectional Study of Diet, Physical Activities, and Weight Gain among the Jordanian Adult Population. *International journal of environmental research and public health*. 2022;19(3).
45. Arafa A, Mohamed A, Saleh L, Senosy S. Psychological Impacts of the COVID-19 Pandemic on the Public in Egypt. *Community mental health journal*. 2021;57(1):64-9.
46. Alomari MA, Alzoubi KH, Khabour OF, Darabseh MZ. Sleeping habits during COVID-19 induced confinement: A study from Jordan. *Heliyon*. 2021;7(12).
47. Alshumrani R, Qanash S, Aldobyany A, Alhejaili F, AlQassas I, Shabrawishi M, et al. Sleep quality and mental health in coronavirus disease 2019 patients and general population during the pandemic. *Annals of Thoracic Medicine*. 2022;17(1):21-7.
48. Romdhani M, Rae DE, Nédélec M, Ammar A, Chtourou H, Al Horani R, et al. COVID-19 Lockdowns: A Worldwide Survey of Circadian Rhythms and Sleep Quality in 3911 Athletes from 49 Countries, with Data-Driven Recommendations. *Sports Med*. 2021:1-16.
49. AlRasheed MM, Alkadir AM, Bin Shuqiran KI, Al-Aqeel S, Jahrami HA, BaHammam AS. The Impact of Quarantine on Sleep Quality and Psychological Distress During the COVID-19 Pandemic. *Nature and Science of Sleep*. 2021;13:1037-48.
50. Torkian S, Akhlaghi E, Khosravi V, Etesami R, Ahmadi A, Khanjani N, et al. Depression symptoms and sleep quality during COVID-19 outbreak in Iran: A national cross-sectional study. *Iranian Journal of Psychiatry and Behavioral Sciences*. 2021;15(1).
51. Al Gharaibeh F, Gibson L. The impact of COVID-19 quarantine measures on the mental health of families. *Journal of Social Work*.
52. Alghamdi AN, Alotaibi MI, Alqahtani AS, Al Aboud D, Abdel-Moneim AS. BNT162b2 and ChAdOx1 SARS-CoV-2 Post-vaccination Side-Effects Among Saudi Vaccinees. *Frontiers in Medicine*. 2021;8.
53. Cheikh Ismail L, Osaili TM, Mohamad MN, Al Marzouqi A, Jarrar AH, Abu Jamous DO, et al. Eating Habits and Lifestyle during COVID-19 Lockdown in the United Arab Emirates: A Cross-Sectional Study. *Nutrients*. 2020;12(11).
54. Akbarpour S, Nakhostin-Ansari A, Haghghi KS, Etesam F, Alemohammad ZB, Aghajani F, et al. COVID-19 Fear Association with Depression, Anxiety, and Insomnia: A National Web-Based Survey on the General Population. *Iranian Journal of Psychiatry*. 2022;17(1):24-34.
55. Keskin DD, Keskin S, Bostan S. Mental disorders among pregnant women during the COVID-19 pandemic. A cross-sectional study. *Sao Paulo Medical Journal*. 2022;140(1):87-93.

- 1  
2  
3 56. Almugti HS, Alotaibi A, Almohammed A, Abuhadi R, Baeshen R, Alharthi Z, et al. Impact  
4 of COVID-19 on Saudi Children: Special Focus on Behavioral, Social, and Emotional Aspects,  
5 2020-2021. *Cureus*. 2021;13(11):e19856.
- 6 57. Al-Rahamneh H, Arafa L, Al Orani A, Baqleh R. Long-term psychological effects of  
7 covid-19 pandemic on children in Jordan. *International Journal of Environmental Research and  
8 Public Health*. 2021;18(15).
- 9 58. Mekkawy LH. Psychological, Nutritional and Behavioral Impact of COVID-19 Lockdown:  
10 A Cross Sectional Study on Egyptian Children. *Psychiatry Investigation*. 2022;19(2):110-6.
- 11 59. Ranjbar K, Hosseinpour H, Shahriarirad R, Ghaem H, Jafari K, Rahimi T, et al. Students'  
12 attitude and sleep pattern during school closure following COVID-19 pandemic quarantine: a  
13 web-based survey in south of Iran. *Environmental Health and Preventive Medicine*. 2021;26(1).
- 14 60. Zengin M, Yayan EH, Vicnelioğlu E. The effects of the COVID-19 pandemic on children's  
15 lifestyles and anxiety levels. *J Child Adolesc Psychiatr Nurs*. 2021;34(3):236-42.
- 16 61. Almhizai RA, Almogren SH, Altwijery NA, Alanazi BA, Al Dera NM, Alzahrani SS, et al.  
17 Impact of COVID-19 on Children's and Adolescent's Mental Health in Saudi Arabia. *Cureus*.  
18 2021;13(11):e19786.
- 19 62. Ghanamah R, Eghbaria-Ghanamah H. Impact of covid-19 pandemic on behavioral and  
20 emotional aspects and daily routines of Arab israeli children. *International Journal of  
21 Environmental Research and Public Health*. 2021;18(6):1-19.
- 22 63. Ustuner Top F, Cam HH. Sleep disturbances in school-aged children 6-12 years during  
23 the COVID-19 pandemic in Turkey. *J Pediatr Nurs*. 2022;63:125-30.
- 24 64. Çetin FH, Uçar HN, Türkoğlu S, Kahraman EM, Kuz M, Güleç A. Chronotypes and  
25 trauma reactions in children with ADHD in home confinement of COVID-19: full mediation effect  
26 of sleep problems. *Chronobiol Int*. 2020;37(8):1214-22.
- 27 65. Dolev T, Zubedat S, Brand Z, Bloch B, Mader E, Blondheim O, et al. Physiological  
28 parameters of mental health predict the emergence of post-traumatic stress symptoms in  
29 physicians treating COVID-19 patients. *Transl Psychiatry*. 2021;11(1):169.
- 30 66. Elghazally NM, Abdeldaim D. Depression among medical staff during the coronavirus  
31 disease-19 pandemic in Egypt: A comparative web-based cross-sectional study. *Open Access  
32 Macedonian Journal of Medical Sciences*. 2021;9:1578-85.
- 33 67. Elgohary HM, Sehlo MG, Bassiony MM, Youssef UM, Elrafey DS, Amin SI. Depression  
34 among health workers caring for patients with COVID-19 in Egypt. *Egyptian Journal of  
35 Neurology, Psychiatry and Neurosurgery*. 2021;57(1).
- 36 68. Abdelghani M, Alsadik M, Abdelmoaty A, Atwa S, Said A, Hassan M. Sleep disturbances  
37 following recovery from COVID-19: a comparative cross-sectional study in Egypt. *Eastern  
38 Mediterranean Health Journal*. 2022;28(1):14-22.
- 39 69. Arafa A, Mohammed Z, Mahmoud O, Elshazley M, Ewis A. Depressed, anxious, and  
40 stressed: What have healthcare workers on the frontlines in Egypt and Saudi Arabia  
41 experienced during the COVID-19 pandemic? *Journal of Affective Disorders*. 2021;278:365-71.
- 42 70. Zarzour M, Hachem C, Kerbage H, Richa S, Choueifaty DE, Saliba G, et al. Anxiety and  
43 sleep quality in a sample of Lebanese healthcare workers during the COVID-19 outbreak.  
44 *Encephale*. 2021.
- 45 71. Duru H. The Continuing Effect of COVID-19 Pandemic on Physical Well-Being and  
46 Mental Health of ICU Healthcare Workers in Turkey: A Single-Centre Cross-Sectional Later-  
47 Phase Study. *Journal of Intensive Care Medicine*. 2021.
- 48 72. Jahrami H, BaHammam AS, AlGahtani H, Ebrahim A, Faris M, AlEid K, et al. The  
49 examination of sleep quality for frontline healthcare workers during the outbreak of COVID-19.  
50 *Sleep and Breathing*. 2021;25(1):503-11.
- 51 73. Meo SA, Alkhalifah JM, Alshammari NF, Alnufaie WS. Comparison of Generalized  
52 Anxiety and Sleep Disturbance among Frontline and Second-Line Healthcare Workers during  
53 the COVID-19 Pandemic. *Int J Environ Res Public Health*. 2021;18(11).
- 54  
55  
56  
57  
58  
59  
60



- 1  
2  
3 74. Yilmaz M, Kirac Y, Sahin MK. Sleep quality and related factors in a sample of Turkish  
4 healthcare workers during the COVID-19 pandemic: A cross-sectional study. *International*  
5 *Journal of Clinical Practice*. 2021;75(11).  
6 75. Elkholy H, Tawfik F, Ibrahim I, Salah El-Din W, Sabry M, Mohammed S, et al. Mental  
7 health of frontline healthcare workers exposed to COVID-19 in Egypt: A call for action. *The*  
8 *International journal of social psychiatry*. 2021;67(5):522-31.  
9 76. Bulut D, Sefa Sayar M, Koparal B, Cem Bulut E, Çelik S. Which of us were more  
10 affected by the pandemic? The psychiatric impacts of the COVID-19 pandemic on healthcare  
11 professionals in the province where the first quarantine units were established in Turkey.  
12 *International Journal of Clinical Practice*. 2021;75(7).  
13 77. Chan MF, Al-Shekaili M, Al-Adawi S, Hassan W, Al-Said N, Al-Sulaimani F, et al. Mental  
14 health outcomes among health-care workers in Oman during COVID-19: A cluster analysis. *Int J*  
15 *Nurs Pract*. 2021;27(6):e12998.  
16 78. Elsalem L, Al-Azzam N, Jum'ah AA, Obeidat N, Sindiani AM, Kheirallah KA. Stress and  
17 behavioral changes with remote E-exams during the Covid-19 pandemic: A cross-sectional  
18 study among undergraduates of medical sciences. *Annals of medicine and surgery* (2012).  
19 2020;60:271-9.  
20 79. Jalal SM, Beth MRM, Al-Hassan HJM, Alshealah NMJ. Body mass index, practice of  
21 physical activity and lifestyle of students during covid-19 lockdown. *Journal of Multidisciplinary*  
22 *Healthcare*. 2021;14:1901-10.  
23 80. Lan AN, Kotler D, Kronfeld-Schor N, Stukalin Y, Einat H. Changes in sleep patterns of  
24 college students in Israel during COVID-19 lockdown, a sleep diaries study. *Sleep and*  
25 *Biological Rhythms*.  
26 81. Meo SA, Alkhalifah JM, Alshammari NF, Alnufaie WS, Algoblan AF. Impact of COVID-19  
27 pandemic on sleep quality among medical and general science students: King Saud University  
28 Experience. *Pakistan Journal of Medical Sciences*. 2022;38(3):639-44.  
29 82. Alyoubi A, Halstead EJ, Zambelli Z, Dimitriou D. The impact of the covid-19 pandemic on  
30 students' mental health and sleep in Saudi Arabia. *International Journal of Environmental*  
31 *Research and Public Health*. 2021;18(17).  
32 83. Saadeh H, Saadeh M, Almobaideen W, Al Refaei A, Shewaikani N, Al Fayez RQ, et al.  
33 Effect of COVID-19 Quarantine on the Sleep Quality and the Depressive Symptom Levels of  
34 University Students in Jordan During the Spring of 2020. *Frontiers in Psychiatry*. 2021;12.  
35 84. Torun F, Torun SD. The psychological impact of the COVID-19 pandemic on medical  
36 students in Turkey. *Pakistan Journal of Medical Sciences*. 2020;36(6):1355-9.  
37 85. Goweda RA, Hassan-Hussein A, Alqahtani MA, Janaini MM, Alzahrani AH, Sindy BM, et  
38 al. Prevalence of sleep disorders among medical students of Umm Al-Qura University, Makkah,  
39 Kingdom of Saudi Arabia. *Journal of Public Health Research*. 2020;9(S1):45-9.  
40 86. Kheirallah K, Bloukh S, Khasawneh W, Alsulaiman J, Khassawneh A, Al-Mistarehi A-H,  
41 et al. Medical students' relative immunity, or lack thereof, against COVID-19 emotional distress  
42 and psychological challenges; a descriptive study from Jordan. *F1000Research*. 2021;10:297.  
43 87. Alkhotani A, Siddiqui MI, Almutashri F, Baothman R. The effect of COVID-19 pandemic  
44 on seizure control and self-reported stress on patient with epilepsy. *Epilepsy and Behavior*.  
45 2020;112.  
46 88. Alhurishi SA, Almutairi KM, Vinluan JM, Aboshaiqah AE, Marie MA. Mental Health  
47 Outcomes of Healthcare Providers During COVID-19 Pandemic in Saudi Arabia: A Cross-  
48 Sectional Study. *Front Public Health*. 2021;9:625523.  
49 89. Karatel M, Bulut ZI, Sari EO, Pelin Z, Yakut Y. The profile of musculoskeletal pain and its  
50 associations with sleep quality and depression during the COVID-19 in Turkey. *Korean Journal*  
51 *of Pain*. 2022;35(1):78-85.  
52  
53  
54  
55  
56  
57  
58  
59  
60

- 1  
2  
3 90. Güç ZG, Alacacioğlu A, Yazır MG, Kalender ME, Ünal S, Oflazoğlu U, et al. Being a  
4 Cancer Patient during the Time of COVID-19: Impact of the Pandemic on the Anxiety and the  
5 Sleeping Quality of Oncology Patients. *Chemotherapy*. 2022;67(1):29-36.
- 6 91. Çolak S, Gürlek B, Önal Ö, Yılmaz B, Hocaoglu C. The level of depression, anxiety, and  
7 sleep quality in pregnancy during coronavirus disease 2019 pandemic. *J Obstet Gynaecol Res*.  
8 2021;47(8):2666-76.
- 9 92. Yeni K, Tulek Z, Terzi M. A year with the fear of COVID-19 in multiple sclerosis patients:  
10 Examination of depression, sleep quality and quality of life before and after the pandemic. *Mult*  
11 *Scler Relat Disord*. 2022;57:103370.
- 12 93. Athamneh M, Sa'Di Q, Aldabbour B, Khader Y, Batayha W. Knowledge, attitudes, and  
13 impact of COVID-19 pandemic among neurology patients in Jordan: A cross-sectional study.  
14 *Journal of the Neurological Sciences*. 2021;429.
- 15 94. Seyahi E, Poyraz BC, Sut N, Akdogan S, Hamuryudan V. The psychological state and  
16 changes in the routine of the patients with rheumatic diseases during the coronavirus disease  
17 (COVID-19) outbreak in Turkey: a web-based cross-sectional survey. *Rheumatology*  
18 *International*. 2020;40(8):1229-38.
- 19 95. Younes S, Safwan J, Rahal M, Hammoudi D, Akiki Z, Akel M. Effect of COVID-19 on  
20 mental health among the young population in Lebanon. *Encephale*. 2021.
- 21 96. Alharbi AS, Alshahrani SM, Alsaadi MM, Al-Jahdali HH, Wali SO, BaHammam AS.  
22 Sleep quality and insomnia during the COVID-19 lockdown among the Saudi public A cross-  
23 sectional study. *Saudi Medical Journal*. 2021;42(4):384-90.
- 24 97. Duran S, Erkin Ö. Psychologic distress and sleep quality among adults in Turkey during  
25 the COVID-19 pandemic. *Progress in Neuro-Psychopharmacology and Biological Psychiatry*.  
26 2021;107.
- 27 98. Alqahtani SS, Banji D, Banji OJF. A survey assessing sleep efficiency among Saudis  
28 during COVID-19 home confinement using the Pittsburgh sleep quality index: A call for health  
29 education. *Saudi Pharmaceutical Journal*. 2021;29(7):692-8.
- 30 99. Cigiloglu A, Ozturk ZA, Efendioğlu EM. How do older adults react to coronavirus disease  
31 2019? *European Geriatric Medicine*. 2020;11(SUPPL 1):S101.
- 32 100. Aslan S, Dinç M. Examining the relationship between nurses' fear levels and insomnia  
33 during the COVID-19 pandemic in Turkey. *Perspect Psychiatr Care*. 2022;58(1):54-60.
- 34 101. Cakmak HSG. Early phase of COVID-19 quarantine impacted insomnia symptoms in  
35 Turkish families. *Sleep science (Sao Paulo, Brazil)*. 2022;15(Spec 1):195-202.
- 36 102. Al-Mutawa N, Al-Mutairi N. Impact of COVID-19 Pandemic and Lockdown Measures on  
37 the Mental Health of the General Population in the Gulf Cooperation Council States: A Cross-  
38 Sectional Study. *Frontiers in Psychiatry*. 2021;12.
- 39 103. Mousavi M, Ahmadi N, Seyedhosseini Ghaheh H, Vaezi A, Javanmard SH.  
40 Psychological impact of COVID-19 on health-care workers: A multicenter cross-sectional study.  
41 *J Res Med Sci*. 2021;26:77.
- 42 104. Barbato M, Thomas J. In this together: Psychological wellbeing of foreign workers in the  
43 United Arab Emirates during the COVID-19 pandemic. *Int J Psychol*. 2021;56(6):825-33.
- 44 105. Robillard R, Saad M, Edwards J, Solomonova E, Pennestri M-H, Daros A, et al. Social,  
45 financial and psychological stress during an emerging pandemic: observations from a  
46 population survey in the acute phase of COVID-19. *BMJ open*. 2020;10(12):e043805.
- 47 106. Leach CR, Rees-Punia E, Newton CC, Chantaprasopsuk S, Patel AV, Westmaas JL.  
48 Stressors and other pandemic-related predictors of prospective changes in psychological  
49 distress. *The Lancet Regional Health-Americas*. 2021;4:100069.
- 50 107. Aydin Sayilan A, Kulakaç N, Uzun S. Burnout levels and sleep quality of COVID-19  
51 heroes. *Perspect Psychiatr Care*. 2021;57(3):1231-6.
- 52  
53  
54  
55  
56  
57  
58  
59  
60

- 1  
2  
3 108. Alimoradi Z, Gozal D, Tsang HWH, Lin CY, Broström A, Ohayon MM, et al. Gender-specific estimates of sleep problems during the COVID-19 pandemic: Systematic review and meta-analysis. *J Sleep Res.* 2022;31(1):e13432.
- 4  
5  
6 109. Salari N, Khazaie H, Hosseini-Far A, Ghasemi H, Mohammadi M, Shohaimi S, et al. The prevalence of sleep disturbances among physicians and nurses facing the COVID-19 patients: a systematic review and meta-analysis. *Global Health.* 2020;16(1):92.
- 7  
8  
9 110. Redeker NS, Caruso CC, Hashmi SD, Mullington JM, Grandner M, Morgenthaler TI. Workplace interventions to promote sleep health and an alert, healthy workforce. *Journal of Clinical Sleep Medicine.* 2019;15(4):649-57.
- 10  
11  
12 111. Souza LFFd, Paineiras-Domingos LL, Melo-Oliveira MEdS, Pessanha-Freitas J, Moreira-Marconi E, Lacerda ACR, et al. The impact of COVID-19 pandemic in the quality of sleep by Pittsburgh Sleep Quality Index: A systematic review. *Ciência & Saúde Coletiva.* 2021;26:1457-66.
- 13  
14  
15 112. Camacho-Montaña LR, Iranzo A, Martínez-Piédrola RM, Camacho-Montaña LM, Huertas-Hoyas E, Serrada-Tejeda S, et al. Effects of COVID-19 home confinement on sleep in children: A systematic review. *Sleep medicine reviews.* 2022:101596.
- 16  
17  
18 113. Astell-Burt T, Feng X, Kolt GS. Does access to neighbourhood green space promote a healthy duration of sleep? Novel findings from a cross-sectional study of 259 319 Australians. *BMJ open.* 2013;3(8):e003094.
- 19  
20  
21 114. Johnson BS, Malecki KM, Peppard PE, Beyer KM. Exposure to neighborhood green space and sleep: evidence from the Survey of the Health of Wisconsin. *Sleep Health.* 2018;4(5):413-9.
- 22  
23  
24 115. DeSantis AS, Diez Roux AV, Moore K, Baron KG, Mujahid MS, Nieto FJ. Associations of neighborhood characteristics with sleep timing and quality: the Multi-Ethnic Study of Atherosclerosis. *Sleep.* 2013;36(10):1543-51.
- 25  
26  
27 116. Johnson DA, Lisabeth L, Hickson D, Johnson-Lawrence V, Samdarshi T, Taylor H, et al. The social patterning of sleep in African Americans: associations of socioeconomic position and neighborhood characteristics with sleep in the Jackson Heart Study. *Sleep.* 2016;39(9):1749-59.
- 28  
29  
30 117. Troxel WM, DeSantis A, Richardson AS, Beckman R, Ghosh-Dastidar B, Nugroho A, et al. Neighborhood disadvantage is associated with actigraphy-assessed sleep continuity and short sleep duration. *Sleep.* 2018;41(10):zsy140.
- 31  
32  
33 118. Hill TD, Trinh HN, Wen M, Hale L. Perceived neighborhood safety and sleep quality: a global analysis of six countries. *Sleep medicine.* 2016;18:56-60.
- 34  
35  
36 119. Billings ME, Gold D, Szpiro A, Aaron CP, Jorgensen N, Gassett A, et al. The association of ambient air pollution with sleep apnea: the multi-ethnic study of atherosclerosis. *Annals of the American Thoracic Society.* 2019;16(3):363-70.
- 37  
38  
39 120. Shen Y-L, Liu W-T, Lee K-Y, Chuang H-C, Chen H-W, Chuang K-J. Association of PM<sub>2.5</sub> with sleep-disordered breathing from a population-based study in Northern Taiwan urban areas. *Environmental Pollution.* 2018;233:109-13.
- 40  
41  
42 121. Lappharat S, Taneepanichskul N, Reutrakul S, Chirakalwasan N. Effects of bedroom environmental conditions on the severity of obstructive sleep apnea. *Journal of Clinical Sleep Medicine.* 2018;14(4):565-73.
- 43  
44  
45 122. Gislason T, Bertelsen RJ, Real FG, Sigsgaard T, Franklin KA, Lindberg E, et al. Self-reported exposure to traffic pollution in relation to daytime sleepiness and habitual snoring: a questionnaire study in seven North-European cities. *Sleep Medicine.* 2016;24:93-9.
- 46  
47  
48 123. Castañeda JL, Kheirandish-Gozal L, Gozal D, Accinelli RA, Group PCIdIdIAR. Effect of reductions in biomass fuel exposure on symptoms of sleep apnea in children living in the peruvian andes: a preliminary field study. *Pediatric pulmonology.* 2013;48(10):996-9.
- 49  
50  
51 124. Halperin D. Environmental noise and sleep disturbances: A threat to health? *Sleep science.* 2014;7(4):209-12.
- 52  
53  
54  
55  
56  
57  
58  
59  
60

- 1  
2  
3 125. Germain A. Sleep disturbances as the hallmark of PTSD: where are we now? *American*  
4 *Journal of Psychiatry*. 2013;170(4):372-82.  
5 126. Galovski TE, Monson C, Bruce SE, Resick PA. Does cognitive-behavioral therapy for  
6 PTSD improve perceived health and sleep impairment? *Journal of Traumatic Stress: Official*  
7 *Publication of The International Society for Traumatic Stress Studies*. 2009;22(3):197-204.  
8 127. Bergen N, Labonté R. "Everything is perfect, and we have no problems": detecting and  
9 limiting social desirability bias in qualitative research. *Qualitative health research*.  
10 2020;30(5):783-92.  
11 128. Larson RB. Controlling social desirability bias. *International Journal of Market Research*.  
12 2019;61(5):534-47.  
13 129. Sedgwick P. What is recall bias? *BMJ*. 2012;344.  
14  
15  
16  
17  
18  
19  
20  
21  
22  
23  
24  
25  
26  
27  
28  
29  
30  
31  
32  
33  
34  
35  
36  
37  
38  
39  
40  
41  
42  
43  
44  
45  
46  
47  
48  
49  
50  
51  
52  
53  
54  
55  
56  
57  
58  
59  
60

**Fig. 1.** Preferred Reporting Items for Systematic Reviews and Meta-Analyses (PRISMA) study selection flow diagram outlining the literature review process when searching for articles on PubMed and Web of Science.



Table S1. Search keywords and MeSH terms developed for the literature search

**Journal Databases Keyword Strategy**

## Search Keywords

**1) Generic Exposure of Interest – COVID-19**

('coronavirus disease 2019' OR '2019 novel coronavirus disease' OR '2019 novel coronavirus epidemic' OR '2019 novel coronavirus infection' OR '2019-ncov disease' OR '2019-ncov infection' OR 'covid' OR 'covid 19' OR 'covid 19 induced pneumonia' OR 'covid 2019' OR 'covid-10' OR 'covid-19' OR 'covid-19 induced pneumonia' OR 'covid-19 pneumonia' OR 'covid19' OR 'sars coronavirus 2 infection' OR 'sars coronavirus 2 pneumonia' OR 'sars-cov-2 disease' OR 'sars-cov-2 infection' OR 'sars-cov-2 pneumonia' OR 'sars-cov2 disease' OR 'sars-cov2 infection' OR 'sarscov2 disease' OR 'sarscov2 infection' OR 'wuhan coronavirus disease' OR 'wuhan coronavirus infection' OR 'coronavirus disease 2' OR 'coronavirus disease 2010' OR 'coronavirus disease 2019' OR 'coronavirus disease 2019 pneumonia' OR 'coronavirus disease-19' OR 'coronavirus infection 2019' OR 'ncov 2019 disease' OR 'ncov 2019 infection' OR 'new coronavirus pneumonia' OR 'novel coronavirus 2019 disease' OR 'novel coronavirus 2019 infection' OR 'novel coronavirus disease 2019' OR 'novel coronavirus infected pneumonia' OR 'novel coronavirus infection 2019' OR 'novel coronavirus pneumonia' OR 'paucisymptomatic coronavirus disease 2019' OR 'severe acute respiratory syndrome 2' OR 'severe acute respiratory syndrome 2 pneumonia' OR 'severe acute respiratory syndrome cov-2 infection' OR 'severe acute respiratory syndrome coronavirus 2 infection' OR 'severe acute respiratory syndrome coronavirus 2019 infection')

AND

**2) Outcome of Interest - sleep health**

('sleep' OR 'sleep' OR 'sleeping' OR 'sleep disorder' OR 'chronobiology disorders' OR 'disturbances of sleep' OR 'dyssomnia' OR 'dyssomnias' OR 'intrinsic sleep disorders' OR 'sleep disorder' OR 'sleep disorders' OR 'sleep disorders, intrinsic' OR 'sleep disturbance' OR 'sleep perturbation' OR 'sleep wake disorder' OR 'sleep wake disorders' OR 'sleep disordered breathing' OR 'apnea, sleep' OR 'apnoea, sleep' OR 'nocturnal apnea' OR 'nocturnal apnoea' OR 'obstructive sleep apnea' OR 'obstructive sleep apnea hypopnea syndrome' OR 'obstructive sleep apnea syndrome' OR 'obstructive sleep apnoea' OR 'obstructive sleep apnoea hypopnoea syndrome' OR 'obstructive sleep apnoea syndrome' OR 'obstructive sleep-disordered breathing' OR 'sleep apnea' OR 'sleep apnea syndrome' OR 'sleep apnea syndromes' OR 'sleep apnea, obstructive' OR 'sleep apnoea' OR 'sleep apnoea syndrome' OR 'sleep apnoea syndromes' OR 'sleep apnoea, obstructive' OR 'sleep disordered breathing')

AND

**3) Population of Interest - Middle Eastern populations**

('middle east' OR 'middle east' OR 'bahrain' OR 'cyprus' OR 'iraq' OR 'kuwait' OR 'saudi' OR 'saudi arabia' OR 'oman' OR 'omani' OR 'jordan' OR 'jordanian' OR 'bahraini' OR 'cypriot' OR 'lebanese' OR 'lebanon' OR 'kuwaiti' OR 'iran' OR 'iranian (citizen)' OR 'israel' OR 'israeli' OR 'gaza strip palestine' OR 'gaza strip' OR 'palestine' OR 'syrian' OR 'syrian arab republic' OR 'egypt' OR 'egyptian' OR 'yemen' OR 'yemeni' OR 'united arab emirates' OR 'emirati' OR 'turkey (republic)' OR 'turkish' OR 'eastern mediterranean region' OR 'qatar' OR 'qatari' OR 'algeria' OR 'algerian' OR 'tunisia' OR 'tunisian' OR 'morroco' OR 'morrocon' OR 'libya' OR 'libyan')

Table S2. List of countries considered in MENA definition in this study.

| Country              |
|----------------------|
| Algeria              |
| Bahrain              |
| Egypt                |
| Iran                 |
| Iraq                 |
| Israel               |
| Jordan               |
| Kuwait               |
| Lebanon              |
| Libya                |
| Morocco              |
| Oman                 |
| Qatar                |
| Saudi Arabia         |
| Syria                |
| Tunisia              |
| United Arab Emirates |
| Yemen                |

Table S3. Newcastle-Ottawa Scale for Bias Assessment

| Study                    | Total Score | Selection                        |             |                 | Comparability              | Outcome                      |                       |
|--------------------------|-------------|----------------------------------|-------------|-----------------|----------------------------|------------------------------|-----------------------|
|                          |             | Representativeness of the sample | Sample size | Non-respondents | Ascertainments of exposure | Based on design and analysis | Assessment of Outcome |
| Özenoğlu et al., 2021    | 6           | *                                | *           |                 | *                          | *                            | *                     |
| Çolak et al., 2021       | 8           | *                                | *           |                 | **                         | *                            | **                    |
| Abbas et al., 2021       | 6           | *                                | *           |                 | *                          | *                            | *                     |
| Abdelghani et al., 2021  | 7           | *                                | *           |                 | **                         | *                            | *                     |
| Abdoli et al., 2021      | 9           | *                                | *           | *               | **                         | **                           | *                     |
| Alah et al., 2022        | 8           | *                                | *           | *               | **                         | *                            | *                     |
| Abouzid et al., 2021     | 8           | *                                | *           | *               | **                         | *                            | *                     |
| Abu-Elnenin et al., 2021 | 9           | *                                | *           | *               | **                         | **                           | *                     |
| Ahorsu et al., 2020      | 8           | *                                | *           | *               | *                          | *                            | **                    |
| Akbari et al., 2021      | 7           | *                                | *           |                 | **                         | *                            | *                     |
| Akbarpour et al., 2022   | 6           | *                                | *           |                 | *                          | *                            | *                     |
| Al Ammari et al., 2021   | 9           | *                                | *           | *               | **                         | **                           | *                     |
| Al Maqbali et al., 2021  | 10          | *                                | *           | *               | **                         | **                           | **                    |
| Al Miskry et al., 2021   | 9           | *                                | *           | *               | **                         | **                           | *                     |



1  
2  
3  
4  
5  
6  
7  
8  
9  
10  
11  
12  
13  
14  
15  
16  
17  
18  
19  
20  
21  
22  
23  
24  
25  
26  
27  
28  
29  
30  
31  
32  
33  
34  
35  
36  
37  
38  
39  
40  
41  
42  
43  
44  
45  
46  
47

|                          |   |   |   |   |    |    |    |   |
|--------------------------|---|---|---|---|----|----|----|---|
| Al Mukhaini et al., 2021 | 7 | * | * |   | ** | *  | *  | * |
| Al Ajlouni et al., 2022  | 8 | * | * | * | ** | *  | *  | * |
| Al Ajlouni et al., 2020  | 8 | * | * | * | ** | *  | *  | * |
| Al Musharaf et al., 2020 | 9 | * | * | * | ** | ** | *  | * |
| Al Mutawa et al., 2021   | 9 | * | * | * | ** | ** | *  | * |
| Al Rahamneh et al., 2021 | 6 | * | * |   | *  | *  | *  | * |
| Al Saleh et al., 2021    | 7 | * | * | * | *  | *  | *  | * |
| Al Anazi et al., 2022    | 6 | * | * |   | *  | *  | *  | * |
| Alboghdady et al., 2022  | 6 | * |   |   | ** | *  | *  | * |
| Alfawaz et al., 2021     | 6 | * | * |   | *  | *  | *  | * |
| Alghamdi et al., 2022    | 6 | * |   |   | ** | *  | *  | * |
| AlGhuffli et al., 2021   | 6 | * |   |   | ** | *  | *  | * |
| AlHadi et al., 2021      | 8 | * | * | * | ** | *  | *  | * |
| Alharbi et al., 2021     | 8 | * | * | * | ** | *  | *  | * |
| Alkhotani et al., 2020   | 8 |   | * |   | ** | ** | ** | * |
| Alhurishi et al., 2021   | 5 |   |   |   | ** | *  | *  | * |
| Ali et al., 2022         | 6 | * |   | * | *  | *  | *  | * |

For peer review only

1  
2  
3  
4  
5  
6  
7  
8  
9  
10  
11  
12  
13  
14  
15  
16  
17  
18  
19  
20  
21  
22  
23  
24  
25  
26  
27  
28  
29  
30  
31  
32  
33  
34  
35  
36  
37  
38  
39  
40  
41  
42  
43  
44  
45  
46  
47

|                         |   |   |   |   |    |    |    |   |
|-------------------------|---|---|---|---|----|----|----|---|
| Ali et al., 2021        | 6 | * |   |   | ** | *  | *  | * |
| Aljemaiah et al., 2021  | 6 | * |   |   | ** | *  | *  | * |
| Aljuffali et al., 2022  | 9 | * | * | * | ** | ** | *  | * |
| Almhdawi et al., 2022   | 7 | * | * |   | ** | *  | *  | * |
| Almhizai et al., 2021   | 5 | * |   |   | *  | *  | *  | * |
| Almugti et al., 2021    | 7 | * | * |   | ** | *  | *  | * |
| Alnofaiey et al., 2020  | 7 | * | * |   | ** | *  | *  | * |
| Alomari et al., 2021    | 6 | * | * |   | *  | *  | *  | * |
| Allothman et al., 2021  | 9 | * | * | * | ** | ** | *  | * |
| Alqahtani et al., 2021  | 8 | * | * | * | ** | *  | *  | * |
| Alrashed et al., 2021   | 5 |   |   |   | ** | *  | *  | * |
| AlRasheed et al., 2022  | 8 | * | * | * | ** | *  | *  | * |
| Alshammari et al., 2021 | 4 |   |   | * | *  | *  | *  |   |
| Alshekaili et al., 2020 | 7 | * | * |   | ** | *  | *  | * |
| Alshumrani et al., 2022 | 8 | * | * |   | ** | *  | ** | * |
| Alsulimani et al., 2021 | 6 | * | * |   | *  | *  | *  | * |
| Araç et al., 2020       | 7 | * |   |   | ** | ** | *  | * |

1  
2  
3  
4  
5  
6  
7  
8  
9  
10  
11  
12  
13  
14  
15  
16  
17  
18  
19  
20  
21  
22  
23  
24  
25  
26  
27  
28  
29  
30  
31  
32  
33  
34  
35  
36  
37  
38  
39  
40  
41  
42  
43  
44  
45  
46  
47

|                            |   |   |   |    |    |    |   |
|----------------------------|---|---|---|----|----|----|---|
| Arafa et al., 2020         | 7 | * | * | ** | *  | *  | * |
| Arafa et al., 2021         | 7 | * |   | ** | ** | *  | * |
| Aslan et al., 2021         | 7 | * | * | ** | *  | *  | * |
| Athamneh et al., 2021      | 6 | * |   | *  | *  | ** | * |
| Aydin Sayilan et al., 2021 | 7 | * | * | ** | *  | *  | * |
| Şentürk et al., 2021       | 6 | * |   | ** | *  | *  | * |
| Büber et al., 2022         | 6 | * |   | ** | *  | *  | * |
| Badahdah et al., 2020      | 5 | * |   | ** | *  | *  | * |
| Badri et al., 2021         | 7 | * | * | *  | *  | *  | * |
| Bar-zeev et al., 2022      | 6 | * | * | *  | *  | *  | * |
| Barbato et al., 2021       | 6 | * |   | ** | *  | *  | * |
| Bilgiç et al., 2021        | 6 | * |   | ** | *  | *  | * |
| Bağcı et al., 2021         | 8 | * | * | *  | ** | *  | * |
| Bucak et al., 2021         | 6 | * |   | ** | *  | *  | * |
| Bulut et al., 2021         | 7 | * | * | ** | *  | *  | * |
| Cahal et al., 2021         | 5 | * |   | *  | *  | *  | * |
| Cakmak et al., 2022        | 6 |   | * | ** | *  | *  | * |

For peer review only

1  
2  
3  
4  
5  
6  
7  
8  
9  
10  
11  
12  
13  
14  
15  
16  
17  
18  
19  
20  
21  
22  
23  
24  
25  
26  
27  
28  
29  
30  
31  
32  
33  
34  
35  
36  
37  
38  
39  
40  
41  
42  
43  
44  
45  
46  
47

|                            |   |   |   |   |    |   |    |   |
|----------------------------|---|---|---|---|----|---|----|---|
| Chan et al., 2021          | 8 | * | * | * | ** | * | *  | * |
| Cheikh Ismail et al., 2021 | 6 | * |   |   | ** | * | *  | * |
| Cheikh Ismail et al., 2020 | 6 | * |   |   | ** | * | *  | * |
| Cigiloglu et al., 2020     | 6 | * |   |   | ** | * | *  | * |
| Coiro et al., 2021         | 6 | * |   |   | ** | * | *  | * |
| Duran et al., 2021         | 7 | * | * |   | ** | * | *  | * |
| Durmaz Engin et al., 2021  | 7 | * | * |   | ** | * | *  | * |
| El Refay et al., 2021      | 6 | * |   |   | ** | * | *  | * |
| Elghazally et al., 2021    | 6 | * |   |   | ** | * | *  | * |
| Elgohary et al., 2021      | 6 |   | * |   | ** | * | *  | * |
| Elkholy et al., 2021       | 7 | * | * |   | ** | * | *  | * |
| Ellakani et al., 2022      | 5 | * |   |   | *  | * | *  | * |
| Elsalem et al., 2020       | 5 |   | * |   | *  | * | *  | * |
| Eren et al., 2021          | 7 | * | * |   | ** | * | *  | * |
| Gol et al., 2021           | 7 | * | * |   | ** | * | *  | * |
| Guc et al., 2022           | 8 | * |   | * | ** | * | ** | * |
| Galali et al., 2021        | 5 | * |   |   | *  | * | *  | * |

For peer review only

1  
2  
3  
4  
5  
6  
7  
8  
9  
10  
11  
12  
13  
14  
15  
16  
17  
18  
19  
20  
21  
22  
23  
24  
25  
26  
27  
28  
29  
30  
31  
32  
33  
34  
35  
36  
37  
38  
39  
40  
41  
42  
43  
44  
45  
46  
47

|                             |   |   |   |    |    |   |   |
|-----------------------------|---|---|---|----|----|---|---|
| Ghanamah et al., 2021       | 5 | * |   | *  | *  | * | * |
| Gokseven et al., 2021       | 6 | * |   | ** | *  | * | * |
| Goweda et al., 2021         | 5 |   |   | ** | *  | * | * |
| Grande et al., 2021         | 7 |   | * | ** | ** | * | * |
| Hadar-Shoval et al., 2021   | 7 | * | * | ** | *  | * | * |
| Hammoudi et al., 2021       | 6 | * |   | ** | *  | * | * |
| Hammouri et al., 2022       | 5 | * |   | *  | *  | * | * |
| Hawari et al., 2021         | 6 | * |   | ** | *  | * | * |
| Husain et al., 2021         | 6 | * | * | *  | *  | * | * |
| Hussien et al., 2020        | 7 | * | * | ** | *  | * | * |
| Iqbal et al., 2021          | 7 | * | * | ** | *  | * | * |
| Jahrami et al., 2021        | 7 | * |   | ** | ** | * | * |
| Jalal et al., 2021          | 8 | * | * | ** | ** | * | * |
| Kamaleddine et al., 2022    | 5 |   |   | ** | *  | * | * |
| Kandemir et al., 2021       | 6 | * |   | ** | *  | * | * |
| Karabulut et al., 2021      | 5 |   |   | ** | *  | * | * |
| Karahan Yilmaz et al., 2021 | 5 | * |   | *  | *  | * | * |

For peer review only

1  
2  
3  
4  
5  
6  
7  
8  
9  
10  
11  
12  
13  
14  
15  
16  
17  
18  
19  
20  
21  
22  
23  
24  
25  
26  
27  
28  
29  
30  
31  
32  
33  
34  
35  
36  
37  
38  
39  
40  
41  
42  
43  
44  
45  
46  
47

|                          |   |   |   |    |   |   |   |
|--------------------------|---|---|---|----|---|---|---|
| Karatel et al., 2022     | 6 | * |   | ** | * | * | * |
| Keskin et al., 2022      | 5 |   |   | ** | * | * | * |
| Khamis et al., 2020      | 6 | * |   | ** | * | * | * |
| Kheirallah et al., 2021  | 6 | * | * | *  | * | * | * |
| Kilani et al., 2020      | 6 | * |   | ** | * | * | * |
| Kolokotorni et al., 2021 | 6 | * |   | ** | * | * | * |
| Korkmaz et al., 2020     | 5 |   |   | ** | * | * | * |
| Lin et al., 2022         | 7 | * | * | ** | * | * | * |
| Lin et al., 2020         | 5 | * |   | *  | * | * | * |
| Maatouk et al., 2022     | 6 | * |   | ** | * | * | * |
| Mahamid et al., 2021     | 6 | * |   | ** | * | * | * |
| Masoumi et al., 2021     | 5 |   |   | ** | * | * | * |
| Mekkawy et al., 2022     | 6 | * |   | ** | * | * | * |
| Meo et al., 2022         | 7 | * | * | ** | * | * | * |
| Mosheva et al., 2020     | 6 | * |   | ** | * | * | * |
| Mousavi et al., 2021     | 7 | * | * | ** | * | * | * |
| Najafipour et al., 2021  | 6 | * |   | ** | * | * | * |

For peer review only

1  
2  
3  
4  
5  
6  
7  
8  
9  
10  
11  
12  
13  
14  
15  
16  
17  
18  
19  
20  
21  
22  
23  
24  
25  
26  
27  
28  
29  
30  
31  
32  
33  
34  
35  
36  
37  
38  
39  
40  
41  
42  
43  
44  
45  
46  
47

|                                   |   |   |   |   |    |    |   |   |
|-----------------------------------|---|---|---|---|----|----|---|---|
| Nakhostin-Ansaeri et al., 2021    | 6 | * |   |   | ** | *  | * | * |
| Nakhostin-Ansari et al., 2020     | 5 | * |   |   | *  | *  | * | * |
| Nashwan et al., 2021              | 5 |   |   |   | ** | *  | * | * |
| Okudan et al., 2021               | 6 | * |   |   | ** | *  | * | * |
| Oteir et al., 2022                | 8 | * | * | * | ** | *  | * | * |
| Radwan et al., 2021               | 6 | * |   | * | *  | *  | * | * |
| Ranjbar et al., 2021              | 6 | * | * |   | *  | *  | * | * |
| Romdhani et al., 2021             | 7 | * | * |   | ** | *  | * | * |
| Saadeh et al., 2021               | 7 | * |   |   | ** | ** | * | * |
| Sadeghniaat-Haghighi et al., 2021 | 6 | * |   |   | ** | *  | * | * |
| Salehinejad et al., 2020          | 6 | * |   |   | ** | *  | * | * |
| Salman et al., 2021               | 6 | * |   |   | ** | *  | * | * |
| Salman et al., 2021               | 6 | * |   |   | ** | *  | * | * |
| San et al., 2021                  | 5 |   |   |   | ** | *  | * | * |
| Sarsak 2022                       | 6 | * |   |   | ** | *  | * | * |
| Seyahi et al., 2020               | 7 | * |   | * | ** | *  | * | * |
| Sis Celik et al., 2021            | 5 | * |   |   | *  | *  | * | * |

For peer review only

|    |                                 |   |   |   |    |    |    |   |
|----|---------------------------------|---|---|---|----|----|----|---|
| 1  |                                 |   |   |   |    |    |    |   |
| 2  |                                 |   |   |   |    |    |    |   |
| 3  |                                 |   |   |   |    |    |    |   |
| 4  | Sultan et al., 2021             | 6 | * | * | *  | *  | *  | * |
| 5  |                                 |   |   |   |    |    |    |   |
| 6  | Tas et al., 2021                | 5 |   | * | *  | *  | *  | * |
| 7  |                                 |   |   |   |    |    |    |   |
| 8  | Tasdemir Yigitoglu et al., 2021 | 7 | * | * | ** | *  | *  | * |
| 9  |                                 |   |   |   |    |    |    |   |
| 10 | Toprak Celenay et al., 2020     | 6 | * |   | ** | *  | *  | * |
| 11 |                                 |   |   |   |    |    |    |   |
| 12 | Torkian et al., 2021            | 6 | * |   | ** | *  | *  | * |
| 13 |                                 |   |   |   |    |    |    |   |
| 14 | Torun et al., 2021              | 6 |   | * | ** | *  | *  | * |
| 15 |                                 |   |   |   |    |    |    |   |
| 16 |                                 |   |   |   |    |    |    |   |
| 17 | Ustuner Top et al., 2022        | 6 | * |   | ** | *  | *  | * |
| 18 |                                 |   |   |   |    |    |    |   |
| 19 | Yilmaz et al., 2021             | 6 | * |   | ** | *  | *  | * |
| 20 |                                 |   |   |   |    |    |    |   |
| 21 | Yalcin et al., 2022             | 8 | * | * | *  | ** | *  | * |
| 22 |                                 |   |   |   |    |    |    |   |
| 23 | Yeni et al., 2022               | 6 |   |   | ** | *  | ** | * |
| 24 |                                 |   |   |   |    |    |    |   |
| 25 |                                 |   |   |   |    |    |    |   |
| 26 | Yilmaz et al., 2021             | 8 | * | * | *  | ** | *  | * |
| 27 |                                 |   |   |   |    |    |    |   |
| 28 | Yilmaz et al., 2021             | 6 | * |   | ** | *  | *  | * |
| 29 |                                 |   |   |   |    |    |    |   |
| 30 | Younes et al., 2021             | 7 | * | * | ** | *  | *  | * |
| 31 |                                 |   |   |   |    |    |    |   |
| 32 | Youssef et al., 2020            | 7 | * |   | ** | ** | *  | * |
| 33 |                                 |   |   |   |    |    |    |   |
| 34 | Yurumez Korkmaz et al., 2021    | 6 |   |   | ** | ** | *  | * |
| 35 |                                 |   |   |   |    |    |    |   |
| 36 |                                 |   |   |   |    |    |    |   |
| 37 | Zach et al., 2021               | 7 | * | * | ** | *  | *  | * |
| 38 |                                 |   |   |   |    |    |    |   |
| 39 | Zarzour et al., 2021            | 6 | * |   | ** | *  | *  | * |
| 40 |                                 |   |   |   |    |    |    |   |
| 41 |                                 |   |   |   |    |    |    |   |
| 42 |                                 |   |   |   |    |    |    |   |
| 43 |                                 |   |   |   |    |    |    |   |
| 44 |                                 |   |   |   |    |    |    |   |
| 45 |                                 |   |   |   |    |    |    |   |
| 46 |                                 |   |   |   |    |    |    |   |
| 47 |                                 |   |   |   |    |    |    |   |



1  
2  
3  
4  
5  
6  
7  
8  
9  
10  
11  
12  
13  
14  
15  
16  
17  
18  
19  
20  
21  
22  
23  
24  
25  
26  
27  
28  
29  
30  
31  
32  
33  
34  
35  
36  
37  
38  
39  
40  
41  
42  
43  
44  
45  
46  
47

|                     |   |   |   |    |   |   |   |
|---------------------|---|---|---|----|---|---|---|
| Zengin et al., 2021 | 7 | * | * | ** | * | * | * |
| Zreik et al., 2021  | 6 | * |   | ** | * | * | * |

For peer review only

Table S4. Results of full literature review, tabulated by sub-population

| Adults               |                                                                                                                |                                                                                                                                                                 |             |                       |                                                                                     |                           |                                                                                                                                                                                                                                                                                                                                                                                                                                                |
|----------------------|----------------------------------------------------------------------------------------------------------------|-----------------------------------------------------------------------------------------------------------------------------------------------------------------|-------------|-----------------------|-------------------------------------------------------------------------------------|---------------------------|------------------------------------------------------------------------------------------------------------------------------------------------------------------------------------------------------------------------------------------------------------------------------------------------------------------------------------------------------------------------------------------------------------------------------------------------|
| Reference            | Location of Study                                                                                              | Population                                                                                                                                                      | Sample Size | Study Design          | Sleep Health Measurement Tool                                                       | Sleep Health Domains      | Main Findings                                                                                                                                                                                                                                                                                                                                                                                                                                  |
| Abouzid et al., 2021 | Egypt, Jordan, United Arab Emirates, Kuwait, Bahrain, Saudi Arabia, Oman, Qatar, Yemen, Syria, Palestine. Iraq | 5896 respondents were included. The participants were aged between 8–23 years (45%; 24–30, 20.5%; 31–40, 18.6%; 41–60, 13.6%; >40, 2.3%) and 62.8% were females | 5896        | Cross-sectional study | Survey items developed by the study's author including questions on sleep duration. | Sleep duration            | 49.6% reported they were sleeping less than 7 h and the sleeping hours increased to 7–10 h. for 53.2%                                                                                                                                                                                                                                                                                                                                          |
| Ahorsu et al., 2020  | Qazvin, Iran                                                                                                   | older adults (50 or older) with a mean age of 57.72 (SD = 7.31) 62% male                                                                                        | 413         | Cross-sectional study | Insomnia Severity Index (ISI)                                                       | Sleep disorder (insomnia) | fear of COVID-19 was a significant mediator (unstandardized coefficient = 0.360; LLCI = 0.112; ULCI = 0.664) in the association between perceived health status and insomnia, significant direct effects of perceived health status on fear of COVID-19 and insomnia (unstandardized coefficient of 1.621; SE = 0.378; p < .001) as well as a significant total effect on insomnia (unstandardized coefficient of 1.981; SE = 0.392; p < .001) |
| Akbari et al., 2021  | Iran                                                                                                           | adults (mean age 30±11 years, 54.3% female)                                                                                                                     | 3,323       | Cross-sectional       | Pittsburgh Sleep Quality Index (PSQI)                                               | Sleep quality             | Inactive participants (IPs) scored significantly lower (p < 0.001) on the global score of sleep-quality than active participants (APs) (mean ± SD, 6.04±2.95, 5.59±2.94, respectively). No significant differences in inactive subgroups. Significant differences in active subgroups (p=0.003) APs that maintained                                                                                                                            |

|                         |                      |                                                                                                                                                                                                                                                             |       |                       |                                                                                            |                                             |                                                                                                                                                                                                                                                                                                                                                                                                                                                                                                                                                                                                                                                     |
|-------------------------|----------------------|-------------------------------------------------------------------------------------------------------------------------------------------------------------------------------------------------------------------------------------------------------------|-------|-----------------------|--------------------------------------------------------------------------------------------|---------------------------------------------|-----------------------------------------------------------------------------------------------------------------------------------------------------------------------------------------------------------------------------------------------------------------------------------------------------------------------------------------------------------------------------------------------------------------------------------------------------------------------------------------------------------------------------------------------------------------------------------------------------------------------------------------------------|
|                         |                      |                                                                                                                                                                                                                                                             |       |                       |                                                                                            |                                             | their activity levels had better sleep quality. Sleep quality after COVID-19: Sleep habits of 49.3% of individuals (APs= 49.5% and IPs= 49.1%) had changed, so that 39.8% of them slept later; sleep time of 44.6% of individuals (APs= 43.7% and IPs= 45.5%) had changed, so that 28.7% of them slept more; and a significant portion of them (APs= 36.7% and IPs= 42.2%) were dissatisfied with their sleep habit changes                                                                                                                                                                                                                         |
| Akbarpour et al., 2022  | Iran                 | 1223 individuals with a mean age of 39.82 ± 10.75 years participated in the study.                                                                                                                                                                          | 1223  | Cross-sectional study | Insomnia Severity Index                                                                    | Sleep problems (insomnia)                   | Prevalence of insomnia 55.2%<br>Being married was associated with less risk for insomnia (OR= 0.69, CI-95%= 0.52-0.91).                                                                                                                                                                                                                                                                                                                                                                                                                                                                                                                             |
| Al Miskry et al., 2021  | United Arab Emirates | 737 participants: 60.7% (n = 447) university students, 27.4% (n = 202) faculty members, and 11.9% (n = 88) staff selected through the convenience sampling method.<br>72.6% (n = 535) of the participants were females, whereas 27.4% (n = 202) were males. | 737   | Cross-sectional study | Survey items developed by the study's author including questions on sleeping difficulties. | Sleep problems (sleep pattern disturbances) | 19.5% experienced changes in sleep patterns                                                                                                                                                                                                                                                                                                                                                                                                                                                                                                                                                                                                         |
| Al-Ajlouni et al., 2020 | Jordan               | mean age 37.35 (SD=11.01), with over 60% aged <40 years<br>52.9% male                                                                                                                                                                                       | 1,240 | Cross-sectional study | Pittsburgh Sleep Quality Index (PSQI)                                                      | Sleep quality                               | over 60% of participants reported having experienced at least one sleep problem in the last week, and nearly half reported having had short sleep duration. Participants reporting mild anxiety were more likely to experience poor sleep quality (aPR = 3.01; 95% CI=2.07 to 4.35), short sleep duration (aPR = 1.35; 95% CI=1.17 to 1.56) and at least one sleep problem (aPR=1.41; 95% CI=1.27 to 1.56). Those reporting moderate anxiety were more likely to experience poor sleep quality (aPR=5.78; 95% CI=3.97 to 8.43), short sleep duration (aPR=1.73; 95% CI=1.47 to 2.04) and at least one sleep problem (aPR=1.56; 95% CI=1.39 to 1.75) |

|                          |                                                                      |                                                                                                                                                                                                           |       |                       |                                       |                                 |                                                                                                                                                                                                                                                                                                                                                                                                                                                                                                                                                                                                                          |
|--------------------------|----------------------------------------------------------------------|-----------------------------------------------------------------------------------------------------------------------------------------------------------------------------------------------------------|-------|-----------------------|---------------------------------------|---------------------------------|--------------------------------------------------------------------------------------------------------------------------------------------------------------------------------------------------------------------------------------------------------------------------------------------------------------------------------------------------------------------------------------------------------------------------------------------------------------------------------------------------------------------------------------------------------------------------------------------------------------------------|
|                          |                                                                      |                                                                                                                                                                                                           |       |                       |                                       |                                 | compared with those reporting minimal anxiety. Corresponding to the dose–response relationship between anxiety and sleep health outcomes, those reporting severe anxiety were the most likely to experience poor sleep quality (aPR = 8.954; 95% CI = 6.12 to 13.08), short sleep duration (aPR = 2.23; 95% CI=1.91 to 2.61) and at least one sleep problem (aPR=1.73; 95% CI=1.54 to 1.95) P-trend <0.001 for all sleep outcomes                                                                                                                                                                                        |
| Al-Ajlouni et al., 2022  | Jordan                                                               | 60% less than 40 years old, mean age of 37.4 (SD = 11.0) 52.9% male                                                                                                                                       | 1,240 | Cross-sectional study | Pittsburgh Sleep Quality Index (PSQI) | Sleep quality                   | Participants who did not meet the guidelines for moderate-to-vigorous physical activity (MVPA) had higher prevalence of poor sleep quality (aPR = 1.68; 95% CI = 1.24–2.26), short sleep duration (aPR = 1.15; 95% CI = 1.00–1.31), and sleep problems (aPR = 1.22; 95% CI = 1.10–1.35)                                                                                                                                                                                                                                                                                                                                  |
| Al-Musharaf et al., 2020 | Saudi Arabia                                                         | A total of 638 young women, with a mean age of 22.0 years ± 1.9 years, were studied. More than half of the women (413; 60%) were undergraduates, and the majority of the sample was unemployed (579; 91%) | 638   | Cross-sectional study | Pittsburgh Sleep Quality Index        | Sleep Quality<br>Sleep duration | PHQ-9 score was positively correlated with the global PSQI score ( $r = 0.25$ , $p < 0.001$ ) and negatively correlated with the duration of sleep (h/day) ( $r = -0.18$ , $p < 0.001$ )<br>GAD-7 anxiety score was positively correlated with a higher global PSQI score (worse sleep) ( $r = 0.178$ , $p < 0.001$ ) and negatively correlated with duration of sleep (hours/day) ( $r = -0.21$ , $p < 0.001$ )<br>The stress score was positively correlated a higher global PSQI (worse sleep) ( $r = 0.159$ , $p < 0.001$ ) and negatively correlated with duration of sleep (h/day) ( $r = -0.196$ , $p < 0.001$ ). |
| Al-Mutawa et al., 2021   | Kuwait, Qatar, Saudi Arabia, Bahrain, United Arab Emirates, and Oman | 14,171 participants, 67.3% females and 60.4% younger than 35 years old. 64.2% from Kuwait                                                                                                                 | 14171 | Cross-sectional study | Insomnia Severity Index               | Sleep problems (insomnia)       | Insomnia among Omani participants was 48.4% UAE participants 66.7%<br><br>Participants in UAE (AOR = 1.455; 1.209–1.750) and Kuwait (AOR = 1.412; 1.244–1.602) were 40% more likely to show insomnia symptoms than participants in Oman.<br><br>Females were also shown to be more susceptible to insomnia during the pandemic since they were 55% more likely to report sleeping problems compared to males                                                                                                                                                                                                             |

1  
2  
3  
4  
5  
6  
7  
8  
9  
10  
11  
12  
13  
14  
15  
16  
17  
18  
19  
20  
21  
22  
23  
24  
25  
26  
27  
28  
29  
30  
31  
32  
33  
34  
35  
36  
37  
38  
39  
40  
41  
42  
43  
44  
45  
46  
47

|                       |              |                                                                                                                                               |      |                       |                                                                                        |                                 |                                                                                                                                                                                                                                                                                                                                                                                                                                                                                                                                                                                                                                                                                                                                                                                                                                                                                                                                                                                                                                                                                                                                                                                                                                                                                                                                     |
|-----------------------|--------------|-----------------------------------------------------------------------------------------------------------------------------------------------|------|-----------------------|----------------------------------------------------------------------------------------|---------------------------------|-------------------------------------------------------------------------------------------------------------------------------------------------------------------------------------------------------------------------------------------------------------------------------------------------------------------------------------------------------------------------------------------------------------------------------------------------------------------------------------------------------------------------------------------------------------------------------------------------------------------------------------------------------------------------------------------------------------------------------------------------------------------------------------------------------------------------------------------------------------------------------------------------------------------------------------------------------------------------------------------------------------------------------------------------------------------------------------------------------------------------------------------------------------------------------------------------------------------------------------------------------------------------------------------------------------------------------------|
|                       |              |                                                                                                                                               |      |                       |                                                                                        |                                 | <p>All age groups younger than 35 years old were about 3 times more likely to show insomnia symptoms than age group &gt;65. The most susceptible age group was shown to be 18 to 24 years old with an adjusted odds ratio of 3.286. Divorced individuals were 31.5% more likely to have sleeping problems than married individuals.</p> <p>Students (AOR = 1.422; 1.227–1.647) were 42%, and unemployed individuals (AOR = 1.305; 1.171–1.454) were 30% more likely to experience sleeping problems.</p> <p>Non-smokers were also 36.5% less likely to report any sign of insomnia than smokers (AOR = 0.635; 0.578–0.698) participants with underlying psychological disorders were 2.1 times (AOR = 2.098; 1.831–2.404) and individuals with underlying medical conditions 34% more likely to experience any symptom of insomnia (AOR = 1.340; 1.218–1.474).</p> <p>Regarding the duration of lockdown, participants who were in no lockdown or experienced the lockdown for &lt;7 days were 18.2% less likely to show insomnia symptoms (AOR = 0.818; 0.746–0.897) compared to those who were in lockdown for more than 30 days. Finally, participants who were never infected with COVID-19 were 18.1% less likely to experience sleep problems than those who contracted COVID-19 at least once (AOR = 0.819; 0.672–0.998)</p> |
| Al-Saleh et al., 2021 | Saudi Arabia | 1641 respondents were included in the current survey. Male participants were 733 (44.7%) and 61.1% of the participants aged 35 years or more. | 1641 | Cross-sectional study | Survey items developed by the study's author including questions on sleeping duration. | Sleep duration                  | Daily sleep hours for less than 8 hours were recorded for 662 (40.3%) participants and family troubles was reported by 44% of the respondents. Poor sleep hygiene was significantly higher among males than females.                                                                                                                                                                                                                                                                                                                                                                                                                                                                                                                                                                                                                                                                                                                                                                                                                                                                                                                                                                                                                                                                                                                |
| Alah et al., 2022     | Qatar        | 1061 participants. Majority were men (757; 71.3%), 35 to 54 years                                                                             | 1061 | Cross-sectional study | Survey items developed by the study's author                                           | Sleep duration<br>Sleep quality | 488 (46%) reported an increase in sleep duration, 149 (14%) reported a decrease. The mean sleep duration increased significantly                                                                                                                                                                                                                                                                                                                                                                                                                                                                                                                                                                                                                                                                                                                                                                                                                                                                                                                                                                                                                                                                                                                                                                                                    |

|                       |              |                                                                                                                                                                                                                                                                                                                  |      |                       |                                                                                                |                                                                                   |                                                                                                                                                                                                                                                                                                                                                                                                                                                                                                                                                                                                                                                            |
|-----------------------|--------------|------------------------------------------------------------------------------------------------------------------------------------------------------------------------------------------------------------------------------------------------------------------------------------------------------------------|------|-----------------------|------------------------------------------------------------------------------------------------|-----------------------------------------------------------------------------------|------------------------------------------------------------------------------------------------------------------------------------------------------------------------------------------------------------------------------------------------------------------------------------------------------------------------------------------------------------------------------------------------------------------------------------------------------------------------------------------------------------------------------------------------------------------------------------------------------------------------------------------------------------|
|                       |              | old (585; 55.1%), married (850; 80.1%), and have completed college or a higher degree of education (832; 78.4%). Over 50 nationalities were reported by participants with the most common being Indian nationality (56.6%). Only 37 (3.5%) Qatari nationals participated. 565 (53.3%) shifted to work from home. |      |                       | including questions on sleep duration and sleep quality                                        |                                                                                   | from 6.90h/d before to 7.78h/d during home confinement (0.89 hour mean difference, 95% CI: 0.74 to 1.04, P<0.001).<br><br>165 (29.2%) of those working from home and 131 (26.4%) of those who continued working regularly reported poorer sleep quality during home confinement as compared with before.                                                                                                                                                                                                                                                                                                                                                   |
| Alfawaz et al., 2021  | Saudi Arabia | Students, staff and faculty of King Saud University<br>47% (726) of the study participants were males and 53% (816) were females. A large proportion of participants were from the age-group of 20–45 years (1229, 79.7%) and most were educated either up to graduate or higher level (1434, 93%).              | 1542 | Cross-sectional study | Survey items developed by the study's author including questions on sleep problems (insomnia). | Sleep problems (insomnia)                                                         | 496 (32.2%) of the participants reported suffering from insomnia constantly (233, 15.1%) or sometimes (263, 17.1%) during lockdown.                                                                                                                                                                                                                                                                                                                                                                                                                                                                                                                        |
| Alghamdi et al., 2022 | Saudi Arabia | Females (n = 236, 64.13%), single (n = 356, 96.74%), and in their senior year (n = 256, 69.57%). The mean age of the participants was 20.4 ± 1.6 years (range: 18–26 years)                                                                                                                                      | 382  | Cross-sectional study | Generalized Sleep Disturbance Scale                                                            | Sleep duration<br>Sleep quality<br>Sleep problems (sleep disturbance, nightmares) | Most participants did not suffer from the presence of nightmares during the quarantine period (n = 251, 68.21%); however, (n = 52, 20.72%) experienced new-onset nightmares when the quarantine started. The presence of nightmares was more significant among females (n = 86; 73.8%) than males (n = 31; 26.5%, $\chi^2(1) = 6.5$ ; p = 0.010.)<br>Male participants with statistically significant nightmares reported frequent early waking from sleep (n = 24, 58.54%) and frequent daytime sleepiness (n = 20, 48.78%). On the other hand, female participants with statistically significant nightmares reported frequent difficulty falling asleep |

|                      |              |                                                                                                                                                                                                                                                                                |      |                       |                                                                        |                                                              |                                                                                                                                                                                                                                                                                                                                                                                                                                                                                                                                                                                                                                                                                                                                  |
|----------------------|--------------|--------------------------------------------------------------------------------------------------------------------------------------------------------------------------------------------------------------------------------------------------------------------------------|------|-----------------------|------------------------------------------------------------------------|--------------------------------------------------------------|----------------------------------------------------------------------------------------------------------------------------------------------------------------------------------------------------------------------------------------------------------------------------------------------------------------------------------------------------------------------------------------------------------------------------------------------------------------------------------------------------------------------------------------------------------------------------------------------------------------------------------------------------------------------------------------------------------------------------------|
|                      |              |                                                                                                                                                                                                                                                                                |      |                       |                                                                        |                                                              | (n = 92, 71.87%), frequent waking up during sleep (n = 84, 65.62%), and frequent daytime sleepiness (n = 72, 56.25%).<br>The mean GSDS was 45.0 ± 14.9 (range: 12–130). There was no difference in the mean GSDS between males and females.<br>The mean subjective reported sleep duration (total daily sleep time) was 7.98 ± 1.8 h; (range 4–15 h). There was a statistically significant difference in the mean sleep duration between males (mean = 7.7 ± 1.6 h) and females (mean = 8.1 ± 1.8 h; t(366) = -2.2; p = 0.029). Approximately 33.4% (n = 123) of the participants reported taking naps during the day (mean = 1.7 ± 0.96 h/d; range: 0–5 h/d). Most participants reported poor sleep quality (n = 226, 61.41%). |
| Alharbi et al., 2021 | Saudi Arabia | 3032 responses<br>The majority of respondents (64.4%) were females.                                                                                                                                                                                                            | 3032 | Cross-sectional study | The Insomnia Severity Index                                            | Sleep disorder (insomnia)                                    | Respondents who are younger, reported having a diagnosed mental illness, have never been married, and students had significantly higher ISI scores than others.<br>The results of the regression model indicate that the most important factors associated with insomnia severity during the COVID-19 pandemic were the level of depression and anxiety, along with the respondent's intolerance of uncertainty, history of a sleep disorder, younger age, and whether they used emotion-based coping strategies.                                                                                                                                                                                                                |
| Alharbi et al., 2021 | Saudi Arabia | 790 responses were included. The majority of participants were the Saudi population (n=735; 92.9%). Two-thirds of the participants were employed. A total of 27.5% were healthcare workers, 45.1% were enterprise or institution workers, and 27.5% were teachers or students. | 790  | Cross-sectional study | Pittsburgh sleep quality index score<br><br>Athens sleep questionnaire | Sleep quality<br>Sleep duration<br>Sleep disorder (insomnia) | The overall Global PSQI was 6.67±3.82 for all participants<br>The prevalence of insomnia and poor sleep quality were 54.4% and 55.5%, respectively. Saudi citizenship was associated with longer sleep duration (p=0.031).<br>Female gender and being married were associated with worse global PSQI, sleep quality, sleep distribution, sleep latency, and daytime dysfunction. In terms of sleep duration, the male gender was worse than the female gender (p<0.001)<br>The prevalence of insomnia was 430 (54.4%).<br>Compared to non-Saudi participants, Saudi                                                                                                                                                              |

|                        |              |                                                                                                                                                                                                                                                                |     |                       |                                                                                     |                                                    |                                                                                                                                                                                                                                                                                                                                                                                                                                                                                                                                                                                                                                                                                                                |
|------------------------|--------------|----------------------------------------------------------------------------------------------------------------------------------------------------------------------------------------------------------------------------------------------------------------|-----|-----------------------|-------------------------------------------------------------------------------------|----------------------------------------------------|----------------------------------------------------------------------------------------------------------------------------------------------------------------------------------------------------------------------------------------------------------------------------------------------------------------------------------------------------------------------------------------------------------------------------------------------------------------------------------------------------------------------------------------------------------------------------------------------------------------------------------------------------------------------------------------------------------------|
|                        |              |                                                                                                                                                                                                                                                                |     |                       |                                                                                     |                                                    | participants were linked to a greater prevalence of insomnia (45.5% versus 55%)<br>the prevalence of insomnia was 61.3% in the single participants and 50.4% in the married participants.                                                                                                                                                                                                                                                                                                                                                                                                                                                                                                                      |
| Aljemaiah et al., 2020 | Saudi Arabia | 347 participants from Taif, Saudi Arabia<br>n = 213 (61.4%) males and n = 134 (38.6%) females. The mean age was 35.5 years (s.d. = 10.3 years). The age range was 12 to 63 years.                                                                              | 347 | Cross-sectional study | 4DSQ scale                                                                          | Sleep quality                                      | Sleep disruption was reported during the initial phase of the lockdown as people's quality of sleep was severely reduced.                                                                                                                                                                                                                                                                                                                                                                                                                                                                                                                                                                                      |
| Allam et al., 2021     | Egypt        | A random sample of 336 staff members employed at Menoufia University age of the participants under the study ranged from 22 to 63 years (35.34±9.0), most of them were married and from urban residence (77.1% and 69%, respectively), and 51.2% were females. | 336 | Cross-sectional study | Survey items developed by the study's author including questions on sleep problems. | Sleep duration<br>Sleep quality<br>Sleep problems  | Workaholics had higher risks than relaxed ones for sleep problems in terms of difficulty initiating sleep, difficulty maintaining sleep, and insufficient sleep (OR: 1.97, 3.39, and 2.23; respectively)                                                                                                                                                                                                                                                                                                                                                                                                                                                                                                       |
| Alnofaiey et al., 2020 | Saudi Arabia | 340 (73.6%) had an age ranging from 23–30 years, 235 (50.9%) were females, 202 (43.7%) were from Taif city, 256 (55.4%) were residents, and 18.6% had an internal medicine specialty.                                                                          | 340 | Cross-sectional study | Pittsburgh Sleep Quality Index (PSQI) scale.                                        | Sleep duration<br>Sleep quality<br>Sleep disorders | Prevalence of sleep disorders was 43.9%, doctors in the age group of 31–40 years, associate consultants had a significant higher prevalence of sleep disorders.<br>Medical interns and laboratory/pathology/microbiology doctors had a significant more difficulty in fall asleep during COVID-19, and internists and surgeons had a significant higher percent of those who used sleeping pills.<br>Resident doctors had a significant higher percent of having trouble in staying awake, and residents and consultants had a significant higher percent of those who suffered decreased sleep duration.<br>Sleep quality during COVID-19 was very good, fair good and very bad in 23.4%, 60% and 3.5% of HCW |



|                        |              |                                                                                                                                                                                                                                                   |      |                       |                                                                                                                         |                                 |                                                                                                                                                                                                                                                                                                                                                                                                                                                                                                                                                                                                                                                                                                                                                                                                                                                                                                                                                                                                             |
|------------------------|--------------|---------------------------------------------------------------------------------------------------------------------------------------------------------------------------------------------------------------------------------------------------|------|-----------------------|-------------------------------------------------------------------------------------------------------------------------|---------------------------------|-------------------------------------------------------------------------------------------------------------------------------------------------------------------------------------------------------------------------------------------------------------------------------------------------------------------------------------------------------------------------------------------------------------------------------------------------------------------------------------------------------------------------------------------------------------------------------------------------------------------------------------------------------------------------------------------------------------------------------------------------------------------------------------------------------------------------------------------------------------------------------------------------------------------------------------------------------------------------------------------------------------|
|                        |              |                                                                                                                                                                                                                                                   |      |                       |                                                                                                                         |                                 | respectively. The study observed a negative impact of COVID-19 pandemic on HCW sleep quality.                                                                                                                                                                                                                                                                                                                                                                                                                                                                                                                                                                                                                                                                                                                                                                                                                                                                                                               |
| Alomari et al., 2021   | Jordan       | 1757 participants: The majority of the participants were women (69.4%), from a middle-income class (77.0%) while 51.6% held a bachelor's degree and 35.6% were unemployed.                                                                        | 1757 | Cross-sectional study | Survey items developed by the study's author including questions on sleep quality, sleep duration, and sleep disorders. | Sleep duration<br>Sleep quality | >50% (range: 53.1%–59.4%) of the participants reported an “increase” in sleep disturbance, nighttime sleeping, and total sleeping hours while 49.1% reported a “decrease” in daytime sleeping. Only age ( $\chi^2 = 20.2$ ; $p = 0.0001$ ) was associated with changes in sleeping disturbances during COVID-19 confinement. Younger age ( $\beta = -0.02$ ; $OR = 0.98$ ; $p = 0.05$ ) was associated with an “increase” in sleeping disturbance<br>Only gender ( $\chi^2 = 13.4$ ; $p = 0.001$ ) is an independent predictor of nighttime sleeping. Being a male is associated with a “decrease” ( $\beta = 0.36$ ; $OR = 1.4$ ; $p = 0.006$ ) in nighttime sleeping hours. Being a male ( $\beta = 0.34$ ; $OR = 1.41$ ; $p = 0.03$ ) and having a high school ( $\beta = -0.70$ $OR = 0.50$ ; $p = 0.007$ ), two-year ( $\beta = -0.67$ ; $OR = 0.50$ ; $p = 0.01$ ), and four-year ( $\beta = -0.46$ ; $OR = 0.63$ ; $p = 0.05$ ) diplomas are associated with a “decrease” in daytime sleeping hours. |
| Alothman et al., 2021  | Saudi Arabia | A total of 669 individuals attempted to complete the online survey, 554 participants completed at least 2 sections of the survey (82.8%), and 41.3% ( $n = 276$ ) completed the whole online survey. The majority of the sample were female (83%) |      | Cross-sectional study | Pittsburgh Sleep Quality Index                                                                                          | Sleep quality<br>Sleep duration | Most had sufficient sleep duration (7.5 hrs $\pm$ 2.1), and also reported poor sleep quality (5.4 $\pm$ 2.4)                                                                                                                                                                                                                                                                                                                                                                                                                                                                                                                                                                                                                                                                                                                                                                                                                                                                                                |
| Alqahtani et al., 2021 | Saudi Arabia | 593 participants 7.7% were males, and 42.3% were females. The response from the age group of 20–30 years was 38.6%, 30.4% were between 31 and 40 years, 17% were in the                                                                           | 593  | Cross-sectional study | Pittsburgh Sleep Quality Index                                                                                          | Sleep quality<br>Sleep duration | The PSQI score (7.2) of the female respondents were higher than that of the males. The mean latency to fall asleep of the former was 42.51 (SD 31.6) min, which was longer than that of the latter.<br>Although the mean PSQI score and the sleep latency of the age group 51 years were high, the mean sleep duration was the shortest.                                                                                                                                                                                                                                                                                                                                                                                                                                                                                                                                                                                                                                                                    |

|                        |              |                                                                                                                                        |     |                       |                                       |                                 |                                                                                                                                                                                                                                                                                                                                                                                                                                                                                                                                                                                                                                                                                                                                                                                                                                                                                                                                                                                                                                                                                                                                                                                                                                                                                                                                                                                                |
|------------------------|--------------|----------------------------------------------------------------------------------------------------------------------------------------|-----|-----------------------|---------------------------------------|---------------------------------|------------------------------------------------------------------------------------------------------------------------------------------------------------------------------------------------------------------------------------------------------------------------------------------------------------------------------------------------------------------------------------------------------------------------------------------------------------------------------------------------------------------------------------------------------------------------------------------------------------------------------------------------------------------------------------------------------------------------------------------------------------------------------------------------------------------------------------------------------------------------------------------------------------------------------------------------------------------------------------------------------------------------------------------------------------------------------------------------------------------------------------------------------------------------------------------------------------------------------------------------------------------------------------------------------------------------------------------------------------------------------------------------|
|                        |              | age group of 41–50 years, and 14% were 51 years. Most of the respondents were from Jazan (43.8%)                                       |     |                       |                                       |                                 | <p>The latency to fall asleep in the age groups of 41–50 years were higher, i.e., 45.13 (SD 34.3) min.</p> <p>The PSQI score and the latency to fall asleep of graduates and postgraduates were higher than those of the respondents with primary and high school education.</p> <p>The respondents with hypertension had the highest PSQI score of 8.09, followed by the subjects with asthma (7.74).</p> <p>However, the sleep duration of the subjects with hypertension was short. The subjects with asthma had the highest latency to fall asleep (55.61 SD 36.01 min) among the individuals with other comorbidities. Individuals with a family history of psychiatric disorders and sleeping pills had higher PSQI scores</p> <p>The presence of comorbidities was related to sleep duration (<math>\chi^2 = 12.13</math> [5], <math>p = 0.03</math>). Sleep duration affected males more than females (OR 1.92 [1.3–2.7], <math>p = 0.001</math>) and subjects aged 51 years (OR 2.49 [1.3–4.4], <math>p = 0.002</math>)</p> <p>Being worried/anxious of the infection significantly affected sleep latency (<math>t = 2.3</math> [591], <math>p = 0.018</math>), sleep duration (<math>t = 4.5</math> [591], <math>p = 0.001</math>), sleep efficiency (<math>t = 2.7</math> [1.0], <math>p = 0.005</math>), and PSQI score (<math>t = 2.84</math> [591], <math>p = 0.005</math>)</p> |
| AlRasheed et al., 2021 | Saudi Arabia | The study included 836 participants. The median age was 28 years, 624 (74.64%) were females, and 158 (18.90%) were healthcare workers. | 836 | Cross-sectional study | Pittsburgh Sleep Quality Index (PSQI) | Sleep quality<br>Sleep duration | Factors associated with poor sleep were recent changes in the sleep habits $p = 0.004$ , anxiety or fear because of coronavirus news on social media $p = 0.02$ , fear because there was no approved drug to treat COVID-19 $p = 0.03$ , and unaware of the presence of chronic diseases $p = 0.03$ . Female gender $p = 0.02$ , fear or anxiety because of coronavirus news on social media $p = 0.04$ , recent change in sleep habits (OR: 1.97 (1.15–3.39); $p = 0.01$ ), fear because there is no approved drug to treat COVID-19 $p = 0.001$ , monthly income <1000 SR $p = 0.01$ , and isolation $p = 0.01$ ) were                                                                                                                                                                                                                                                                                                                                                                                                                                                                                                                                                                                                                                                                                                                                                                       |

|                         |                      |                                                                                                                                                                                                                                                                                                                                                                                                                                |      |                       |                                                                                     |                                            |                                                                                                                                                                                                                                                                                                                                                                                                                    |
|-------------------------|----------------------|--------------------------------------------------------------------------------------------------------------------------------------------------------------------------------------------------------------------------------------------------------------------------------------------------------------------------------------------------------------------------------------------------------------------------------|------|-----------------------|-------------------------------------------------------------------------------------|--------------------------------------------|--------------------------------------------------------------------------------------------------------------------------------------------------------------------------------------------------------------------------------------------------------------------------------------------------------------------------------------------------------------------------------------------------------------------|
|                         |                      |                                                                                                                                                                                                                                                                                                                                                                                                                                |      |                       |                                                                                     |                                            | associated with distress. PSQI and K10 scores were significantly correlated $p < 0.001$ ).                                                                                                                                                                                                                                                                                                                         |
| AlRasheed et al., 2021  | Saudi Arabia         | The study included a total of 353 participants; 88 were in isolation because they had current or suspected COVID-19 infection or because they had just arrived from abroad, with 265 non-isolated individuals serving as controls. The age of the isolated group was $28.6 \pm 9.8$ (mean $\pm$ standard deviation) years versus $27.5 \pm 8.5$ years for the non-isolated group, with males accounting for 37% in both groups | 353  | Cross-sectional study | Pittsburgh Sleep Quality Index (PSQI)                                               | Sleep duration<br>Sleep quality            | The mean PSQI score was $8.5 \pm 3.6$ and $8.4 \pm 3.5$ for the isolated and non-isolated groups, respectively ( $P = 0.92$ ).<br>Poor sleep (PSQI $\geq 6$ ) was reported in 235 (66.6%)<br>Isolation was not associated with poor sleep (OR: 0.73 (95% CI: 0.41–1.3), $P = 0.29$ )                                                                                                                               |
| Alshumrani et al., 2022 | Saudi Arabia         | A total of 1091 participants were surveyed; 643 (58.9%) were COVID-19 patients. The mean age of the patients in the COVID-19 arm was $42.8 \pm 15.2$ years, with a male predominance of 61.1%.                                                                                                                                                                                                                                 | 1091 | Cross-sectional study | Athens Insomnia Scale                                                               | Sleep quality<br>Sleep disorder (insomnia) | The majority (58.1%) reported worsened sleep during the COVID-19 pandemic.<br>Poor sleep quality was reported in 66.1% of the patients in the COVID-19 group (mean score of $6.9 \pm 4.0$ ) and 72.8% of participants in the control group (mean score $7.6 \pm 4.3$ ). Insomnia affected 50.5% of the patients with COVID-19 (mean score of $6.5 \pm 5.5$ ) and 58.5% of controls (mean score of $7.6 \pm 5.5$ ). |
| Arafa et al., 2021      | Egypt                | 1629 participants, 48.1% were aged $\leq 30$ years, 42.4% were men, and 20.0% were working in the health sector                                                                                                                                                                                                                                                                                                                | 1629 | Cross-sectional study | Survey items developed by the study's author including questions on sleep duration. | Sleep duration                             | inadequate sleeping (less than 6hrs/ day) (23.1%)                                                                                                                                                                                                                                                                                                                                                                  |
| Badri et al., 2021      | United Arab Emirates | 574 older adults in Abu Dhabi<br>About 60% were male and 40% were female.<br>Most of them were                                                                                                                                                                                                                                                                                                                                 | 574  | Cross-Sectional study | Survey items developed by the study's author including questions on                 | Sleep disorders                            | The analysis took each of the ten psychological feelings as dependent variables, where time was treated as the only independent variable. and resulted in ten individual regression analyses. Sleeping disorders showed significance at the 0.05                                                                                                                                                                   |

|                            |                      |                                                                                                                                                                                                                                                                                |      |                           |                                                                      |                                                   |                                                                                                                                                                                                                                                                                                                                                                                                                                                    |
|----------------------------|----------------------|--------------------------------------------------------------------------------------------------------------------------------------------------------------------------------------------------------------------------------------------------------------------------------|------|---------------------------|----------------------------------------------------------------------|---------------------------------------------------|----------------------------------------------------------------------------------------------------------------------------------------------------------------------------------------------------------------------------------------------------------------------------------------------------------------------------------------------------------------------------------------------------------------------------------------------------|
|                            |                      | married (82.4%), while only (7.7%) were single. Around (3.1%) were separated, widowed, or divorced. About 40% were Emirati and 60% were non-Emiratis.                                                                                                                          |      |                           | sleep duration.                                                      |                                                   | level. The positive standardized coefficients and t-values note more negative development for sleeping for older adults, suggesting that time harms the development of the sleeping disorders.                                                                                                                                                                                                                                                     |
| Barbato et al., 2021       | United Arab Emirates | international sample of foreign workers (n = 319) resident in the United Arab Emirates (UAE). The majority of participants were female (76%), European (69%) and highly educated (83% had a bachelor's or higher degree)                                                       | 319  | Cross-sectional study     | Insomnia Severity Index                                              | Sleep disorders (insomnia)                        | Insomnia symptoms were observed in 33% of participants, with 4% of participants showing severe symptoms. A higher reported prevalence of insomnia was observed among younger participants, females, and a more severe impact of COVID-19 in the home country.                                                                                                                                                                                      |
| Başkan et al., 2021        | Turkey               | Using the snowball sampling method for sample selection, 1,909 individuals aged 18-65 years living in Turkey. 69% of the respondents was female, 48.9% was married, 68.5% had moderate income, and 43.1% was civil servant. Of the participants, 78.6% was university graduate | 1909 | descriptive type research | Pittsburgh Sleep Quality Index (PSQI)                                | Sleep quality                                     | The PSQI score was $7.78 \pm 3.46$ , and 71.6% of the participants had poor sleep quality. A significant, positive and weak relationship was found between the total scores on PSQI and PSS ( $p < 0.05$ )                                                                                                                                                                                                                                         |
| Cheikh Ismail et al., 2020 | United Arab Emirates | 1012 participants, highest number of participants residing in Abu Dhabi (33.9%) and Dubai (32.5%)<br>Females (75.9%), aged 26–35 years (29.1%), were married (56.4%), had no children (50%), completed a bachelor's                                                            | 1012 | Cross-sectional study     | Copenhagen Psychosocial Questionnaire (COPSOQ-II) with modifications | Sleep quality<br>Sleep duration<br>Sleep disorder | Significant decrease in the percentage of participants who reported sleeping less than seven hours per night from 51.7% before the pandemic to 39% during the pandemic ( $p < 0.001$ )<br>A higher percentage of participants reported poor sleep quality during the pandemic (28.1%) compared to before the pandemic (17.3) ( $p < 0.001$ ), and sleep disturbances were also more common during the pandemic (60.8%) compared to before (52.9%). |

|                            |                                                                                                                             |                                                                                                                                                                                                                                                                                                                                                                                                                                                            |      |                       |                                       |                                                   |                                                                                                                                                                                                                                                                                                                                                                                                                                                                                                                                                                                                                     |
|----------------------------|-----------------------------------------------------------------------------------------------------------------------------|------------------------------------------------------------------------------------------------------------------------------------------------------------------------------------------------------------------------------------------------------------------------------------------------------------------------------------------------------------------------------------------------------------------------------------------------------------|------|-----------------------|---------------------------------------|---------------------------------------------------|---------------------------------------------------------------------------------------------------------------------------------------------------------------------------------------------------------------------------------------------------------------------------------------------------------------------------------------------------------------------------------------------------------------------------------------------------------------------------------------------------------------------------------------------------------------------------------------------------------------------|
|                            |                                                                                                                             | degree (54.1%), worked full-time (53.3%), and were working or studying from home during quarantine (61.6%).                                                                                                                                                                                                                                                                                                                                                |      |                       |                                       |                                                   | 30.9% of the surveyed participants reported feeling lazy and less energized during the pandemic, compared to only 4.7% before the pandemic ( $p < 0.001$ )<br>Sleep disturbances increase was significantly higher in females ( $p = 0.011$ ).<br>Sleep duration and quality was most affected among participants aged 18–35 ( $p < 0.001$ ).                                                                                                                                                                                                                                                                       |
| Cheikh Ismail et al., 2021 | Bahrain, Egypt, Iraq, Jordan, Kuwait, Lebanon, Oman, Palestine, Qatar, Saudi Arabia, Syria, United Arab Emirates and Yemen. | 2970 participants from 18 countries in the MENA region<br>The largest proportion of respondents was from the United Arab Emirates (13.1 %), Jordan (11.9 %), Lebanon (11.5 %), Saudi Arabia (8.3 %) and Palestine (6.4 %).<br>28.4 % males, aged 18–25 years (29.6 %), were married (53.2 %), had no children (49.7 %), completed a university degree (48.5 %), worked full-time (44.8 %) and were working/studying from home during the lockdown (56.0 %) | 2970 | Cross-sectional study | Copenhagen Psychosocial Questionnaire | Sleep quality<br>Sleep duration<br>Sleep disorder | Although the percentage of participants who were sleeping <7 h per night decreased from 51.4 % before the pandemic to 36.6 % during the pandemic, the percentages of participants reporting poor sleep quality increased from 17.1 % before the pandemic to 29.2 % during the pandemic ( $P < 0.001$ ).<br>Moreover, a higher percentage of participants reported sleep disturbances during the pandemic (63.2 %) compared with before (53.1 %). As a result, 29.6 % of the participants reported feeling lazy and less energised during the pandemic, compared with only 4.7 % before the pandemic ( $P < 0.001$ ) |
| Cigiloglu et al., 2020     | Turkey                                                                                                                      | Of the 104 participants, 61 (58.7%) were men, and 75 (72.1%) were ages 65–74. With regard to health, 76.9% of respondents reported a history of at least one chronic disease                                                                                                                                                                                                                                                                               | 104  | Cross-sectional study | Richards-Campbell Sleep Questionnaire | Sleep quality                                     | None of the groups had a mean sleep score indicating very poor sleep quality (score: 0–25). As the monthly income and education level increased, scores for most of the sleep parameters also increased<br>Found that depression and anxiety symptoms were associated with poorer quality of life and sleep quality.                                                                                                                                                                                                                                                                                                |
| Corio et al., 2021         | Israel                                                                                                                      | 2541 participants: Israel (N = 1969) and the U.S. (N = 572)<br>Israeli sample: Age 40.4                                                                                                                                                                                                                                                                                                                                                                    | 2541 | Cross-sectional study | Pittsburgh Sleep Quality Index        | Sleep quality                                     | 56% of the sample were poor sleepers<br>A large majority of the sample (88.9%) reported that their sleeping habits had changed since the pandemic started in at least one of the 6 ways                                                                                                                                                                                                                                                                                                                                                                                                                             |

|                    |        |                                                                                                                                                                                                                                                                                                                                 |     |                       |                                |               |                                                                                                                                                                                                                                                                                                                                                                                                                                                                                                                                                                                                                                                                       |
|--------------------|--------|---------------------------------------------------------------------------------------------------------------------------------------------------------------------------------------------------------------------------------------------------------------------------------------------------------------------------------|-----|-----------------------|--------------------------------|---------------|-----------------------------------------------------------------------------------------------------------------------------------------------------------------------------------------------------------------------------------------------------------------------------------------------------------------------------------------------------------------------------------------------------------------------------------------------------------------------------------------------------------------------------------------------------------------------------------------------------------------------------------------------------------------------|
|                    |        | ± 13.76, Female 55.1% (1085)                                                                                                                                                                                                                                                                                                    |     |                       |                                |               | assessed.<br>Almost 70% of the participants reported they were going to bed later, and almost 50% reported waking up later in the morning<br>the strongest correlations were between use of sleeping medication and both depression (rs = .55, P < .001) and anxiety (rs = .57, P < .001), and between sleep disturbances and both depression (rs = .52, P < .001) and anxiety (rs = .49, P < .001).<br>Participants who reported more COVID-related stress reported significantly poorer sleep quality, with moderate effect sizes                                                                                                                                   |
| Duran et al., 2021 | Turkey | 405 participants, 70.9% of the participants were female, 29.1% were male. While 6.7% of the participants were single, 82.2% had undergraduate or higher degrees. 48.4% were continuing to work from their workplace, 15.1% were continuing to work from home, and 36.5% were not working at a job. 69.4% did not have children. | 405 | Cross-sectional study | Pittsburgh Sleep Quality Index | Sleep quality | Mean sleep quality score was 6.39 ± 3.31. The prevalence of poor sleep quality was 55.1%. The sleep quality of the single participants and the participants with low education levels was poorer. The sleep quality of those who left work in the pandemic period was poorer than those who were working from home/office and those who were already not employed before the pandemic. The sleep quality of those not working in the field of health was better than healthcare professionals and those not working at all. The scores for psychological distress were negatively correlated with sleep quality levels.                                               |
| Eren et al., 2021  | Turkey | 405 participants<br>67.9% (275) of the individuals participating in the study were women, and 34.6% (281) were under 20 years old.<br>68.4% (277) of the individuals are university graduates and high graduate, 67.2% (272) are single, 28.6% (116) have children.                                                             | 405 | Cross-sectional study | Pittsburg Sleep Quality Index  | Sleep quality | While 23% (93) of the participants had sleep problems before the COVID19 outbreak, 40% (162) had sleep problems after the COVID19 outbreak. It was determined that 183 (78.9%) participants with good sleep quality did not have sleep problems after the start of the COVID-19 outbreak, and 113 (65.3%) participants with poor sleep quality experienced sleep problems after the start of the COVID-19 outbreak.<br>As a result of an increase in the state-trait anxiety scale score by 1 point, the risk of poor sleep quality increased 1.051 times (5.1%)<br>A statistically significant relationship was found between PSQI classes and psychiatric diagnosis |

|                           |                 |                                                                                                                                                                                                                                                             |      |                       |                                                                                                                 |                           |                                                                                                                                                                                                      |
|---------------------------|-----------------|-------------------------------------------------------------------------------------------------------------------------------------------------------------------------------------------------------------------------------------------------------------|------|-----------------------|-----------------------------------------------------------------------------------------------------------------|---------------------------|------------------------------------------------------------------------------------------------------------------------------------------------------------------------------------------------------|
|                           |                 |                                                                                                                                                                                                                                                             |      |                       |                                                                                                                 |                           | status ( $\chi^2=4.416$ , $p=0.036$ ). It was found that 226 people (97.4%) with good sleep level had no psychiatric diagnosis, and 12 people (6.9%) with bad sleep level had psychiatric diagnosis. |
| Galali, 2021              | Iraqi Kurdistan | 2137 participants included 74.9% (1,600) from Erbil, 22.3% (476) from Sulaimani, and 2.9% (61) from Duhok. Regarding gender, results showed that 43.4% (927) were male and 56.4% (1,210) were female.                                                       | 2137 | Cross-sectional study | Survey items developed by previous study "EBLC-COVID19 questionnaire" Including questions on sleeping behavior. | Sleep duration            | During the pandemic, the percentage of people reporting sleeping between 7 and 9 hr per night increased from 44.8% to 53.6% and those reporting more than 9 hr sleep increased from 8.1% to 22.4%.   |
| Gokseven et al., 2021     | Israel          | 315 participants: 178 were female and 137 were male. The mean age was $71.5 \pm 5.6$ (min: 65, max: 94) years, and 26 participants were living alone.                                                                                                       | 315  | Cross-sectional study | Survey items developed by the study's author including questions on sleep disorder.                             | Sleep disorder (Insomnia) | 30.8% (n = 97) of the participants stated that they had difficulty falling asleep at night after the onset of COVID-19 infection                                                                     |
| Hadar-Shoval et al., 2021 | Israel          | 421 Participants. The sample comprised 295 women (70%), and participants had a mean age of $37.93 \pm 16.47$ years (range 18-90) and a mean education of $14.39 \pm 2.78$ years. About 53.8% (n=226) lived in urban areas and 46.2% (n=194) in rural areas. | 421  | Cross-sectional study | Pittsburgh Sleep Quality Index                                                                                  | Sleep quality             | For the entire sample, sleep disorder (insomnia), as measured by PSQI, revealed poor sleep quality (6.82; above 5 is an indication of sleep disturbances).                                           |
| Hammoudi et al., 2021     | Lebanon         | 111 (18.8%) males, 480 (81.2%) females                                                                                                                                                                                                                      | 591  | Cross-sectional       | Insomnia Severity Index                                                                                         | Insomnia levels           | Regarding phone screen times among the university students, the prevalence of insomnia, anxiety,                                                                                                     |

|                       |                                 |                                                                                                                                                                         |     |                       |                                                                                      |                |                                                                                                                                                                                                                                                                                                                                                                                   |
|-----------------------|---------------------------------|-------------------------------------------------------------------------------------------------------------------------------------------------------------------------|-----|-----------------------|--------------------------------------------------------------------------------------|----------------|-----------------------------------------------------------------------------------------------------------------------------------------------------------------------------------------------------------------------------------------------------------------------------------------------------------------------------------------------------------------------------------|
|                       |                                 |                                                                                                                                                                         |     | study                 | (ISI), Bedtime Procrastination Scale                                                 |                | depression, and overweight increased with increasing phone screen time. Female sex (adjusted odds ratio [aOR]=2.19, 95% confidence interval [CI]=1.27-3.77), overweight status (aOR=1.85, 95% CI=1.22-1.28), insomnia (aOR=1.06, 95% CI=1.02-1.10), and bedtime procrastination (aOR=1.03, 95% CI=1.00-1.07) were significant predictors of a phone screen time of $\geq 7$ hours |
| Hammouri et al., 2022 | Jordan                          | 467 participants. 297 (64%) responses from females and 170 (36%) from males. The population age was between 18 and 103 years old and the mean was 33.9 years (SD 13.1). | 467 | Cross-sectional study | Survey items developed by the study's author including questions on sleep duration.  | Sleep duration | There is a significant difference in the increase in hours of sleep, where single people (59%) increased the amount of sleep more so than married people (43.4%).<br>The respondents who increased their sleeping hours tended to have a younger mean of age for all significant pairwise comparisons.                                                                            |
| Husain et al., 2020   | Kuwait                          | 415 adults participated in this descriptive cross-sectional study with a mean age of $38.47 \pm 12.73$ years; most of them were females, numbering 285 (68.7%).         | 415 | Cross-sectional study | Survey items developed by the study's author including questions on sleeping habits. | Sleep quality  | With regard to sleeping habits, results indicated significant statistical differences before and during the pandemic, there was a decrease in the percentage of participants who slept during the night and a marked increase in the percentage of participants who slept during the day (OR = 3.99 (95% CI 2.86–6.62), $p < 0.001$ )                                             |
| Hussien et al., 2020  | Egypt, Jordan, and Saudi Arabia | General populations of Egypt (198 participants, 40% female), Jordan (148 participants, 36% female), and Saudi Arabia (358 participants, 42% female) were recruited.     | 704 | Cross-sectional study | Survey items developed by the study's author including questions on sleep quality.   | Sleep quality  | 53.7% of the sample reported sleep disturbances. A high DASS mean score was significantly associated with reporting disturbances in sleep                                                                                                                                                                                                                                         |
| Iqbal et al., 2021    | Saudi Arabia                    | 397 questionnaires from the participants. The respondents were mostly of youth age (19-24 years), 66.5% of respondents were male, while there were 33.5%                | 397 | Cross-sectional study | Pittsburgh sleep quality index                                                       | Sleep quality  | While correlating the sleep patterns disturbance in individuals who had contact with COVID-19 patients, there was a significant sleep disturbance. The disturbance of sleep was in having problems falling sleep ( $p$ -value=0.024), having bad/horrible dreams ( $p$ -value=0.017), feeling cold at sleeping ( $p$ -                                                            |



|                             |              |                                                                                                                                                                                                                                                                             |       |                       |                                                                                                       |                                 |                                                                                                                                                                                                                                                                                                                                                                                                                                                                                                                    |
|-----------------------------|--------------|-----------------------------------------------------------------------------------------------------------------------------------------------------------------------------------------------------------------------------------------------------------------------------|-------|-----------------------|-------------------------------------------------------------------------------------------------------|---------------------------------|--------------------------------------------------------------------------------------------------------------------------------------------------------------------------------------------------------------------------------------------------------------------------------------------------------------------------------------------------------------------------------------------------------------------------------------------------------------------------------------------------------------------|
|                             |              | females. Most of the participants did not contact any COVID-19 patients (75.1%, n=298)                                                                                                                                                                                      |       |                       |                                                                                                       |                                 | value=0.038), and difficulty staying active during eating or driving (p-value=0.012).<br><br>The sleep quality is poor due to the stay-at-home order, having a disorganized working schedule, and deprived lifestyle.                                                                                                                                                                                                                                                                                              |
| Karahan Yilmaz et al., 2021 | Turkey       | A total of 1120 individuals, 412 (36.8 %) male and 708 (63.2 %) females, participated in the study. The mean age was determined as 33.04 ± 11.04. Among those who participated in the research, 84.6 % of individuals were university/bachelor's/master's degree graduates. | 1,120 | Cross-sectional study | Survey items developed by the study's author including questions on sleep quality and sleep duration. | Sleep duration<br>Sleep quality | During the pandemic period, 42.5 % of the individuals stated that they slept more and 40.2 % stated that there was no change in their sleep patterns. Daily physical activity durations were determined as 8.25 ± 1.77 h for sleep                                                                                                                                                                                                                                                                                 |
| Keng et al., 2022           | 86 countries | 67% (n = 4959) of the participants were female                                                                                                                                                                                                                              | 7,402 | Longitudinal study    | Survey                                                                                                | Question on sleep quality       | COVID-related infection risk and perceived economic burden were both negatively associated with sleep quality during the previous week. (b = 0.67, SE = 0.01, p <.001) Those who reported high economic burden (top 10%) reported decreased sleep quality regardless of levels of perceived infection risk, b = -0.02, SE = 0.02, p =.325, whereas people perceiving low economic burden (bottom 10%) reported better sleep quality if their perceived infection risk was also low, b = -0.111, SE = 0.02, p <.001 |
| Kilani et al., 2020         | MENA region  | 917 males, 37.4 ±13.4 years old and 806 females 32.2 ± 11.5 years old                                                                                                                                                                                                       | 1,723 | Cross-sectional study | Pittsburgh Sleep Quality Index (PSQI)                                                                 | Sleep quality                   | t-test analysis revealed a significant difference in mental wellbeing score based on sleep quality (t = -16.413, p < 0.001). A significant number of respondents (43%) reported poor sleep quality. Those with good sleep quality showed significantly better mental wellbeing (15.5 ± 3.4) in comparison with those with poor sleep quality (12.4 ± 4.2) (p <                                                                                                                                                     |

|                          |        |                                                                                                                                                                             |     |                       |                                       |                                                    |                                                                                                                                                                                                                                                                                                                                                                                                                                                                                                                                                                                                                                                                                                                                                                                                                                                                                                                                                                                                                                          |
|--------------------------|--------|-----------------------------------------------------------------------------------------------------------------------------------------------------------------------------|-----|-----------------------|---------------------------------------|----------------------------------------------------|------------------------------------------------------------------------------------------------------------------------------------------------------------------------------------------------------------------------------------------------------------------------------------------------------------------------------------------------------------------------------------------------------------------------------------------------------------------------------------------------------------------------------------------------------------------------------------------------------------------------------------------------------------------------------------------------------------------------------------------------------------------------------------------------------------------------------------------------------------------------------------------------------------------------------------------------------------------------------------------------------------------------------------------|
|                          |        |                                                                                                                                                                             |     |                       |                                       |                                                    | .001)                                                                                                                                                                                                                                                                                                                                                                                                                                                                                                                                                                                                                                                                                                                                                                                                                                                                                                                                                                                                                                    |
| Kolokotroni et al., 2021 | Cyprus | Out of 745 participants (sample of adults who resided in Cyprus during the Spring 2020 lockdown), 74% were female and median age was 39 years.                              | 745 | Cross-sectional study | Pittsburgh Sleep Quality Index        | Sleep quality                                      | <p>Overall participants reported significantly worse sleep quality score (4 v 5, <math>p &lt; 0.01</math>) during lockdown.</p> <p>Regarding the individual PSQI score components (sleep latency, daytime dysfunction, sleep medication and sleep quality), all increased during lockdown (<math>p &lt; 0.01</math>), demonstrating a worse sleep experience, except sleep efficiency, which marginally improved during lockdown (<math>p &lt; 0.01</math>).</p> <p>a positive moderate correlation (<math>r = 0.4064</math>, <math>p &lt; 0.01</math>) between differences in perceived stress and sleep quality index before and during lockdown, indicating that an increase in perceived stress was associated with worsening sleep quality.</p> <p>Overall support index score difference was negatively correlated with sleep quality index difference (<math>r = -0.2253</math>, <math>p &lt; 0.01</math>), showing that a decrease in the overall support index during lockdown was associated with worsening sleep quality.</p> |
| Korkmaz et al., 2020     | Turkey | 61 (44%) females and 79 (56%) males participants<br>The average age for female participants was $30.7 \pm 6.2$ and the average age for male participants was $35.6 \pm 8.7$ | 140 | Cross-sectional study | Pittsburgh Sleep Quality Index (PSQI) | Sleep quality                                      | There was a positive correlation between the Beck Anxiety Inventory (BAI) scores and the PSQI and Problem Solving Inventory (PSI) scores of the participants and a negative correlation between the World Health Organization Quality of Life-BREF (WHOQOL-BREF) scores and the PSQI and PSI scores of the participants ( $p = 0.000$ , $r = 0,508$ ; $p = 0.029$ , $r = 0,184$ ; $p = 0.000$ , $r = -0,360$ )                                                                                                                                                                                                                                                                                                                                                                                                                                                                                                                                                                                                                           |
| Lan et al., 2021         | Israel | Studied the effects of lockdown in three cohorts: (1) 169 individuals from the general population; (2) 91 undergraduate students and (3) 39 women within fertility age.     | 299 | Cohort study          | Sleep logs<br>Online questionnaire    | Sleep duration<br>Sleep quality<br>Sleep disorders | <p>In cohort (1) lockdown resulted in increased sleep duration (<math>p &lt; 0.001</math>), and delayed midsleep point during workdays (<math>p = 0.07</math>) and weekends (<math>p = 0.02</math>) largest change in sleep duration was shown in young people with late chronotype (<math>p = 0.04</math>) and older subjects with early chronotype (<math>p = 0.04</math>).</p> <p>In cohort (2), There were effects of lockdown</p>                                                                                                                                                                                                                                                                                                                                                                                                                                                                                                                                                                                                   |

|                      |              |                                                                                                                                                                                 |       |                       |                                                                                     |                           |                                                                                                                                                                                                                                                                                                                                                                                                        |
|----------------------|--------------|---------------------------------------------------------------------------------------------------------------------------------------------------------------------------------|-------|-----------------------|-------------------------------------------------------------------------------------|---------------------------|--------------------------------------------------------------------------------------------------------------------------------------------------------------------------------------------------------------------------------------------------------------------------------------------------------------------------------------------------------------------------------------------------------|
|                      |              |                                                                                                                                                                                 |       |                       |                                                                                     |                           | (p=0.02) and chronotype (p=0.05) on sleep duration. Increased sleep during lockdown and in early chronotypes. Females slept more during lockdown (p=0.01) and students who work slept less (p=0.02). Midsleep point free days (MSF) was delayed during lockdown (p=0.001) with MSF of late chronotypes later than MSF of early chronotypes (p<0.001).                                                  |
| Lin et al., 2020     | Iran         | A sample of Iranian young adults (n = 1078 with 628 males; mean age = 26.24 years [SD ± 7.41])                                                                                  | 1078  | Cross-sectional study | Insomnia Severity Index                                                             | Sleep disorder (insomnia) | Insomnia was mutually and significantly correlated with psychological distress, problematic social media use, fear of COVID-19, COVID-19 misunderstanding.<br><br>Problematic social media use was significantly associated with insomnia via both direct (B = 0.095; SE = 0.038) and indirect paths.                                                                                                  |
| Lin et al., 2020     | 19 countries | N/A                                                                                                                                                                             | N /A  | Longitudinal study    | Google trends                                                                       | Sleep disorder (insomnia) | The countries with the greatest increases in searches for insomnia were Iran, Spain, the United States, and Italy; these countries exhibited a significant increase in insomnia searches on more than 10 of the 31 days observed. The number of COVID-19–related deaths was positively correlated to the number of days with an increase in searches for insomnia in the 19 countries (p=0.64, P=.003) |
| Lin et al., 2022     | Iran         | Sample of 10,843 participants (mean age = 35.54 years; SD = 12.00), 6751 were females (62.3%)                                                                                   | 10843 | Cross-sectional study | Insomnia Severity Index                                                             | Sleep disorder (insomnia) | Suicidal ideation was positively and significantly correlated with insomnia (r = 0.327; p < 0.001) Generalized trust was negatively and significantly correlated with insomnia (r = -0.100; p < 0.001) insomnia and fear of COVID-19 were positively and significantly correlated (r = 0.271; p < 0.001).                                                                                              |
| Maatouk et al., 2022 | Lebanon      | 948 participants, divided into four groups: non-smokers not at risk (NSNR), non-smokers at risk (NSR), smokers not at risk (SNR), and smokers at risk (SR). A person at risk is | 948   | Cross-sectional study | Survey items developed by the study's author including questions on sleep duration. | Sleep duration            | NSNR significantly increased their sleep duration by 64.284 min per night (p < .001)<br><br>SNR increased their sleep duration by 54.732 min per night (p < .001)                                                                                                                                                                                                                                      |

|                      |                        |                                                                                                                                                                                                                                                                                                                            |     |                       |                                       |                                    |                                                                                                                                                                                                                                                                                                                                                                                                                                                                                                                                                                                                                                                                                                                   |
|----------------------|------------------------|----------------------------------------------------------------------------------------------------------------------------------------------------------------------------------------------------------------------------------------------------------------------------------------------------------------------------|-----|-----------------------|---------------------------------------|------------------------------------|-------------------------------------------------------------------------------------------------------------------------------------------------------------------------------------------------------------------------------------------------------------------------------------------------------------------------------------------------------------------------------------------------------------------------------------------------------------------------------------------------------------------------------------------------------------------------------------------------------------------------------------------------------------------------------------------------------------------|
|                      |                        | <p>an individual with a disease that could worsen the prognosis of a potential COVID-19 infection.</p> <p>Age mean: NSNR (26.52 years, standard deviation = 10.051), NSR (33.26 years, standard deviation = 15.672), SNR (29.55 years, standard deviation = 11.314), and SR (34.39 years, standard deviation = 12.193)</p> |     |                       |                                       |                                    |                                                                                                                                                                                                                                                                                                                                                                                                                                                                                                                                                                                                                                                                                                                   |
| Mahamid et al., 2021 | West bank of Palestine | 129 males and 237 females                                                                                                                                                                                                                                                                                                  | 366 | Cross-sectional study | DSM-5 Level 2—Sleep Disturbance Scale | Sleep disorder( sleep disturbance) | Problematic internet use positively correlated with sleep disturbance ( $r = .19, p < .01$ ), and negatively correlated with life satisfaction ( $r = -.17, p < .01$ ). Moreover, life satisfaction negatively correlated to sleep disturbance ( $r = -.25, p < .01$ ). Sleep disturbance explained statistically and significantly variance in problematic internet use ( $B = .16, SE = .04, \beta = .20$ )                                                                                                                                                                                                                                                                                                     |
| Masoumi et al., 2021 | Iran                   | Mean (SD) age was 28.8 (5.9) years. 119 females (60%)                                                                                                                                                                                                                                                                      | 200 | Cross-sectional study | Mini-Sleep Questionnaire              | Sleep duration and sleep quality   | Sleep quality was 30%, worse in the pandemic period compared to the pre-pandemic states, The mean time to go to bed and wake-up time on weekdays in the pandemic were 35 and 24 min later than those in the pre-pandemic period respectively. The mean time to go to bed and wake-up time on weekends in the pandemic were 21 and 6 min later than those pre-pandemics. Before the pandemic, subjects went to bed on weekends 40 min later than on weekdays ( $p < 0.0001$ ). In the pandemic, this difference decreased to 26 min ( $p < 0.0001$ ). In both the pre-pandemic and pandemic periods, subjects woke up 96 min later on weekends compared to the weekdays ( $p < 0.0001$ ). Before the pandemic, the |

|                               |      |                                                                                                                                                                                                                                              |     |                       |                                                                                     |                           |                                                                                                                                                                                                                                                                                                                                                                                                                                                                                                                                                                                                                                                                                                                                                           |
|-------------------------------|------|----------------------------------------------------------------------------------------------------------------------------------------------------------------------------------------------------------------------------------------------|-----|-----------------------|-------------------------------------------------------------------------------------|---------------------------|-----------------------------------------------------------------------------------------------------------------------------------------------------------------------------------------------------------------------------------------------------------------------------------------------------------------------------------------------------------------------------------------------------------------------------------------------------------------------------------------------------------------------------------------------------------------------------------------------------------------------------------------------------------------------------------------------------------------------------------------------------------|
|                               |      |                                                                                                                                                                                                                                              |     |                       |                                                                                     |                           | mean sleep duration every night was 7 h and 22 min for the weekdays, which decreased to 6 h and 44 min during the pandemic. The difference signified a 38 min sleep debt every night. The night sleep duration on weekdays before the pandemic was 33 min shorter than the night sleep duration on weekends (p <0.0001). This difference decreased to 2 min during the pandemic.                                                                                                                                                                                                                                                                                                                                                                          |
| Najafipour et al., 2021       | Iran | Of 911 participants, 365 (40.1%) were men. Almost half of the participants (51.7%) aged over 55 years. Married people accounted for 80.4% of the samples, 72.7% were illiterate or have non-university education, and 67.6% were unemployed. | 911 | Cross-sectional study | Survey items developed by the study's author including questions on sleep duration. | Sleep duration            | 42.8% and 58.8% experienced sleep time abnormality before and after the quarantine, respectively<br>A high percentage of people experienced an increase in sleep hours (33.7%)<br><br>The odds of an increase in sleep hours was higher in men and young people and lower in people with intense PA and higher levels of anxiety. The changes in the three variables were mostly related to the quarantine, although interaction between PA and sleep was also present.<br><br>There was a negative relationship between anxiety and sleep hours and between PA and sleep hours both before and after quarantine.                                                                                                                                         |
| Nakhostin-Ansari et al., 2021 | Iran | 675 people with a mean age of 40.28 years (SD=11.15) participated in the study. One-hundred and ninety-six (29%) were male, and 479 (71%) were female.                                                                                       | 675 | Cross-sectional study | Insomnia Severity Index                                                             | Sleep disorder (insomnia) | Three hundred and forty-two participants (50.7%) had subthreshold insomnia, 275 (40.7%) participants had moderate insomnia, and 58 participants (8.6%) had severe insomnia. Six-hundred and seventeen participants (91.4%) had DIS, 585 participants (86.7%) had DMS, and 520 participants (77%) suffered from EMA. The prevalence of these disorders was significantly different from each other (P<0.05), and DIS was the most common insomnia pattern.<br>fear of COVID-19 was a risk factor for all patterns of insomnia (OR=1.19, 1.12, 1.02 for DMS, DIS, and EMA, respectively). Age was a risk factor for EMA (OR= 1.09), but it was a protective factor for DMS (OR=0.98). Self-employment was a risk factor for DMS (OR=1.61) and DIS (OR=1.59) |

|                       |                      |                                                                                                                                                                                                                                                                                 |      |                       |                                                                                     |                                                    |                                                                                                                                                                                                                                                                                                                                                                                                                                                                                              |
|-----------------------|----------------------|---------------------------------------------------------------------------------------------------------------------------------------------------------------------------------------------------------------------------------------------------------------------------------|------|-----------------------|-------------------------------------------------------------------------------------|----------------------------------------------------|----------------------------------------------------------------------------------------------------------------------------------------------------------------------------------------------------------------------------------------------------------------------------------------------------------------------------------------------------------------------------------------------------------------------------------------------------------------------------------------------|
|                       |                      |                                                                                                                                                                                                                                                                                 |      |                       |                                                                                     |                                                    | Conclusion: Fear of COVID-19 is a major contributing factor to insomnia patterns. Investigation of COVID-19 fear in people with insomnia and the addition of attributed relieving or management strategies to conventional management of insomnia are reasonable approaches to improve the sleep condition of people in the pandemic.                                                                                                                                                        |
| Okudan et al., 2021   | Turkey               | 37.88±12.44 years age, 346 (68.5%) females and 159 (1.5%) males                                                                                                                                                                                                                 | 505  | Cross-sectional study | Online survey                                                                       | Quality of life (WHO Quality Of Life)-Bref version | 27.5% (N.=142) informed that even they sleep enough time, wake up tired, while 22.1% (N.=114) cannot sleep enough time, and wake up tired.                                                                                                                                                                                                                                                                                                                                                   |
| Oved et al., 2021     | Israel               | Out of the 169 participants, 94 (55.62%) were women, and 75 (44.38%) were men. The age of the participants ranged between 20 and 80, with clear two main age groups: 20–40 and 60–80.                                                                                           | 169  | longitudinal study    | Smartwatch data collection                                                          | Sleep duration<br>Sleep quality                    | An increase was observed in sleep duration based on questionnaire responses (an average of 6.28 h versus 6.42 h, $p < 0.01$ , Cohen's $d = 0.14$ ) and based on smartwatch records (an average of 7.03 h versus 7.12 h, $p = 0.05$ , Cohen's $d = 0.14$ ), MSF (an average hour of 4.03 versus 4.12, $p = 0.02$ , Cohen's $d = 0.13$ ) and MSW (an average hour of 3.43 versus 3.49, $p = 0.07$ , Cohen's $d = 0.08$ ). No significant effects were found for stress, sleep quality and SJL. |
| Radwan et al., 2021   | United Arab Emirates | 2060 responses. Three-quarters (75.1%) were females, 31.7% were between 18 and 30 years old, 38.4% were between 31 and 40 years old, and 29.9% were older than 40 years. Over half of the study population (63.8%) were married and the majority had a university degree (76%). | 2060 | Cross-sectional study | Survey items developed by the study's author including questions on sleep duration. | Sleep duration                                     | Decreased sleep was reported by 20.8%. In terms of sleeping behavior, females were more likely to experience decreased sleep compared to males, whereas older adults (>40 years old vs. 18–30 years old) were less likely to experience decreased sleep during the lockdown.                                                                                                                                                                                                                 |
| Romdhani et al., 2021 | 49 countries         | athletes (mean age: 25.1 (range 18-61) years, 1764 female (45%), 2427 team-sport (63%) and                                                                                                                                                                                      | 3911 | Cross-sectional study | Pittsburgh Sleep Quality Index (PSQI) and Insomnia                                  | Sleep quality, Sleep disorder (insomnia)           | PSQI ( $4.3 \pm 2.4$ to $5.8 \pm 3.1$ ) and ISI ( $4.8 \pm 4.7$ to $7.2 \pm 6.4$ ) scores increased from pre- to during lockdown ( $p < 0.001$ ). PSQI was predominantly influenced by sleep-onset latency ( $p < 0.001$ ; + 29.8%), sleep                                                                                                                                                                                                                                                   |

|                                   |      |                                                                         |      |                       |                                                                                                             |                                                                                                                   |                                                                                                                                                                                                                                                                                                                                                                                                                                                                                                                                                                                                                                                                                                                                                                                                                                                                                                                                            |
|-----------------------------------|------|-------------------------------------------------------------------------|------|-----------------------|-------------------------------------------------------------------------------------------------------------|-------------------------------------------------------------------------------------------------------------------|--------------------------------------------------------------------------------------------------------------------------------------------------------------------------------------------------------------------------------------------------------------------------------------------------------------------------------------------------------------------------------------------------------------------------------------------------------------------------------------------------------------------------------------------------------------------------------------------------------------------------------------------------------------------------------------------------------------------------------------------------------------------------------------------------------------------------------------------------------------------------------------------------------------------------------------------|
|                                   |      | 1442 elite (37%) athletes                                               |      |                       | Severity Index (ISI)                                                                                        |                                                                                                                   | <p>efficiency (<math>p &lt; 0.001</math>; - 21.1%), and total sleep time (<math>p &lt; 0.001</math>; - 20.1%), while ISI was affected by sleep-onset latency (<math>p &lt; 0.001</math>; + 21.4%), bedtime (<math>p &lt; 0.001</math>; + 9.4%), and eating after midnight (<math>p &lt; 0.001</math>; + 9.1%)</p> <p>Athletes went to bed (+ 75 min; 5.4%; <math>d = 1.14</math>) and woke up (+ 150 min; 34.5%; <math>d = 1.71</math>) later during lockdown with an increased total sleep time (+ 48 min; 10.6%; <math>d = 0.83</math>). Lockdown-mediated circadian disruption had more deleterious effects on the sleep quality of individual-sport athletes compared with team-sport athletes (<math>p &lt; 0.001</math>; <math>d = 0.41</math>), elite compared with non-elite athletes (<math>p = 0.028</math>; <math>d = 0.44</math>) and older compared with younger (<math>p = 0.008</math>; <math>d = 0.46</math>) athletes</p> |
| Sadeghniaat-Haghighi et al., 2021 | Iran | 1,223 participants [827 (67.6%) female, mean age=39.82±10.75 years old] | 1223 | Cross-sectional study | Insomnia Severity Index                                                                                     | Sleep disorder (insomnia)                                                                                         | <p>675 (55.2% [95%CI=52.40-57.98]) were categorized into the insomnia group. Insomnia was more prevalent in females (<math>p=0.006</math>), participants with 50 years old or higher (<math>p=0.04</math>), or high fear of COVID-19 (<math>p&lt;0.0001</math>). Totally, 67.4%, 66.4%, and 55% of all participants had DIS, DMS, and EMA, respectively, in the current outbreak. Besides, 79% had impaired daily functioning, 51.6% had impaired quality of life, and 62% were worried about their sleep problem. Notably that a considerable percentage of individuals with normal ISI scores had at least one insomnia phenotype or impaired daily functioning and quality of life. Further analyses revealed a significant increasing trend in all four insomnia phenotypes prevalence with an increase in fear of COVID-19 (all <math>p</math>-values&lt;0.0001).</p>                                                                 |
| Salehinejad et al., 2020          | Iran | Healthy volunteers 137 females, mean age = 25.79 ± 7.31                 | 160  | Cross-sectional study | Pittsburgh Sleep Quality Index (PSQI), Quantitative sleep parameters, Morningness-Eveningness Questionnaire | PSQI: sleep quality, Quantitative Sleep parameters: about time to go to bed (clock), sleep onset latency time (in | <p>PSQI: significant decrease of global sleep quality during quarantine (<math>t = 6.95</math>, <math>p &lt; 0.001</math>). t-test showed that the time to fall asleep was prolonged during home quarantine as compared to the time before quarantine (<math>t= 7.32</math>, <math>p &lt; 0.001</math>). The average sleep duration (in h) was significantly longer during quarantine, as compared to before quarantine as well (<math>t = -3.65</math>, <math>p &lt; 0.001</math>). 85.6 % of the participants (137</p>                                                                                                                                                                                                                                                                                                                                                                                                                   |

|                     |        |                                                                                                                                                                                                                                                                                                  |     |                       |                                                                                     |                                                                                                                  |                                                                                                                                                                                                                                                                                                                                                                                                                           |
|---------------------|--------|--------------------------------------------------------------------------------------------------------------------------------------------------------------------------------------------------------------------------------------------------------------------------------------------------|-----|-----------------------|-------------------------------------------------------------------------------------|------------------------------------------------------------------------------------------------------------------|---------------------------------------------------------------------------------------------------------------------------------------------------------------------------------------------------------------------------------------------------------------------------------------------------------------------------------------------------------------------------------------------------------------------------|
|                     |        |                                                                                                                                                                                                                                                                                                  |     |                       |                                                                                     | minutes), time to get up in the morning, and sleep duration<br>Morningness-eveningness questionnaire: chronotype | of 160) reported at least 1 h delay to get up in the morning on average in home quarantine. The average delay to get up in the morning during home quarantine was 2.28 h. Results showed that participants' time to get up in the morning was significantly delayed during quarantine ( $t= 15.36$ , $p < 0.001$ )                                                                                                        |
| Salman et al., 2021 | Kuwait | Data from 679 respondents (57.9% females and 42.1% males; 67.7% Kuwaiti nationals and 32.3% non-Kuwaiti nationals)                                                                                                                                                                               | 679 | Cross-sectional study | Survey items developed by the study's author include questions on quality of sleep. | Sleep quality                                                                                                    | Mental health was highly correlated with the quality of sleep<br><br>Extremely severe depression was associated with having poor or very poor quality of sleep (1.75 times).<br><br>Severe or extremely severe psychological distress was associated with having poor or very poor quality of sleep (2.20 times)                                                                                                          |
| Salman et al., 2021 | Kuwait | Among 679 respondents, 57.9% were female and 67.7% were Kuwaitis. Age group categories were represented relatively evenly, with 28.7% of respondents in their 20s, 29.3% in their 30s, 23.0% in their 40s, and 19.0% in the age range of 50 years or above. The average age was 37.7 (SD: 11.6). | 679 | Cross-sectional study | Survey items developed by the study's author include questions on quality of sleep. | Sleep quality                                                                                                    | 36.4% of respondents rated their quality of sleep as 'poor' or 'very poor'. Days of physical activity were positively correlated with 'quality of sleep'<br><br>Sleep hours were positively correlated with good quality of sleep. Quality of sleep was negatively correlated with 'consumption of sugary drinks' and 'consumption of sweets and snacks', and positively correlated with 'the days of physical activity'. |
| Savci et al., 2021  | Turkey | The final sample consisted of the remaining 103 older adults residing in a nursing home affiliated with the Istanbul Darulaceze Directorate of Hospice.                                                                                                                                          | 103 | Correlational study   | Survey items developed by the study's author include questions on sleep patterns.   | Sleep quality                                                                                                    | 18.4% of the participants had change in sleep patterns during the pandemic.                                                                                                                                                                                                                                                                                                                                               |



|                             |              |                                                                                                                                                                                                                                                                                   |      |                       |                                                                                                     |                                 |                                                                                                                                                                                                                                                                                                                                                                                                                                            |
|-----------------------------|--------------|-----------------------------------------------------------------------------------------------------------------------------------------------------------------------------------------------------------------------------------------------------------------------------------|------|-----------------------|-----------------------------------------------------------------------------------------------------|---------------------------------|--------------------------------------------------------------------------------------------------------------------------------------------------------------------------------------------------------------------------------------------------------------------------------------------------------------------------------------------------------------------------------------------------------------------------------------------|
|                             |              | The inclusion criteria for the study were as follows: be over 65 years old, voluntarily agree to participate in the study, have a Standardized Mini Mental Test Score of 24 or higher, residence within the nursing home for at least one year, and speak and understand Turkish. |      |                       |                                                                                                     |                                 |                                                                                                                                                                                                                                                                                                                                                                                                                                            |
| Şentürk et al., 2021        | Turkey       | 254 (55.3%) males and 205 (44.7%) females. The age of the participants ranged from 24 to 60 years (M=35.64, SD=6.84) and mean age was 35.64±6.84                                                                                                                                  | 459  | Cross-sectional study | Jenkins Sleep Scale (JSS)                                                                           | Subjective sleep quality        | Poor sleep quality is a predictor of depression ( $\beta=0.378$ , $p<0.001$ ), of anxiety ( $\beta=0.373$ , $p<0.001$ ) and stress ( $\beta=0.324$ , $p<0.001$ )                                                                                                                                                                                                                                                                           |
| Sultan et al., 2021         | Saudi Arabia | Three hundred thirty-eight individuals responded to the survey. Participants were 267 females (79%) and 71 males (21%) with a median age of 40 which ranged from 30 to 44 years.                                                                                                  | 338  | Cross-sectional study | Survey items developed by the study's author include questions on sleep duration and sleep quality. | Sleep duration<br>Sleep quality | The percentage of participants who used to sleep more than nine hours daily increased significantly during the pandemic from 8.3% to 21.8% ( $p<0.001$ ). Use of sleeping aids increased from 11.6% to 15.7% ( $p<0.001$ ), with 7.7% of participants having difficulty falling asleep for more than two hours. Moreover 41.8% did not feel relaxed after getting up from sleep during the pandemic compared to 14.2% before ( $p<0.001$ ) |
| Toprak Celenay et al., 2020 | Turkey       | 375 individuals in the Stay at home group and 311 individuals in the Continued to work group were included in data analysis.                                                                                                                                                      | 686  | Cross-sectional study | Jenkins Sleep Scale                                                                                 | Sleep quality                   | JSS-T scores revealed sleep quality was similar in both groups ( $p > .05$ )                                                                                                                                                                                                                                                                                                                                                               |
| Torkian et al., 2021        | Iran         | 3,446 people completed the questionnaire. most participants were female (66.7%), mean ( $\pm$ SD) age of the                                                                                                                                                                      | 3446 | Cross-sectional study | Pittsburgh Sleep Quality Index                                                                      | Sleep quality                   | 73.5% had poor sleep quality. Perceived income, hours spent outdoors, the number of people with COVID-19 that were acquainted with, and a history of depression were significantly related to sleep quality.                                                                                                                                                                                                                               |

|                     |         |                                                                                                                                                                                                                                                                                                               |      |                       |                                                                                   |                                 |                                                                                                                                                                                                                                                                                                                                                                                                                                                                                                                                                                                                                                                                                                      |
|---------------------|---------|---------------------------------------------------------------------------------------------------------------------------------------------------------------------------------------------------------------------------------------------------------------------------------------------------------------|------|-----------------------|-----------------------------------------------------------------------------------|---------------------------------|------------------------------------------------------------------------------------------------------------------------------------------------------------------------------------------------------------------------------------------------------------------------------------------------------------------------------------------------------------------------------------------------------------------------------------------------------------------------------------------------------------------------------------------------------------------------------------------------------------------------------------------------------------------------------------------------------|
|                     |         | participants was 34.2 ( $\pm$ 11.60) years. 65% were married.                                                                                                                                                                                                                                                 |      |                       |                                                                                   |                                 |                                                                                                                                                                                                                                                                                                                                                                                                                                                                                                                                                                                                                                                                                                      |
| Yalcin et al., 2022 | Turkey  | A sample of 8,276 volunteers, aged between 18 and 65, were recruited via an online platform. The mean age of the sample was 39.86 ( $\pm$ 13.13). Approximately half of the sample were females (47.33%). Majority of volunteers were married (67.85%).                                                       | 8276 | Cross-sectional study | Pittsburgh Sleep Quality Index                                                    | Sleep quality                   | 46.38% of the sample were poor sleepers as indexed by the PSQI<br><br>The PHAM showed that the perceived vulnerability to diseases was significantly associated with poor sleep quality ( $\beta$ = 0.175, $p$ < 0.001)<br><br>Negative affectivity as indexed by DASS-21 was significantly tied to poor sleep quality ( $\beta$ = 0.188, $p$ < 0.001)                                                                                                                                                                                                                                                                                                                                               |
| Yilmaz et al., 2021 | Turkey  | A total of 1120 individuals, 412 (36.8 %) male and 708 (63.2 %) females, participated in the study. The mean age was determined as 33.04 $\pm$ 11.04.                                                                                                                                                         | 1120 | Cross-sectional study | Survey items developed by the study's author include questions on sleep patterns. | Sleep duration<br>Sleep quality | During the pandemic period, 42.5 % of the individuals stated that they slept more and 40.2 % stated that there was no change in their sleep patterns. Daily physical activity durations were determined as 8.25 $\pm$ 1.77 h for sleep.                                                                                                                                                                                                                                                                                                                                                                                                                                                              |
| Younes et al., 2021 | Lebanon | A total of 4397 respondents. Included participants from all Lebanese districts, of whom 2924 (66.5%) were females, and those who received university education were 3664 (83.3%). The recruited participants were young adults between 18–35 years old, among which 3439 (78.2%) aged between 18 and 25 years | 4397 | Cross-sectional study | Insomnia Severity Index                                                           | Sleep disorder (insomnia)       | A considerable proportion of participants had symptoms of insomnia (941 [21.4%]).<br><br>The median IQR scores on the the ISI for insomnia for all respondents was 10 (5–14).<br><br>Higher perceived likelihood of contracting COVID-19 (aOR = 0.67, 95% CI: 0.56; 0.79) resulted in no clinical or subthreshold insomnia.<br><br>Single marital status (aOR = 1.43, 95% CI: 1.05; 1.93), divorced marital status (aOR = 3.33, 95% CI: 1.50; 7.39), university education (aOR = 2.50, 95% CI: 1.51; 4.16), consumption of caffeinated beverages (aOR = 1.24, 95% CI: 1.03; 1.49) and energy drinks (aOR = 1.22, 95% CI: 1.02; 1.47) were significantly associated with moderate to severe insomnia. |

1  
2  
3  
4  
5  
6  
7  
8  
9  
10  
11  
12  
13  
14  
15  
16  
17  
18  
19  
20  
21  
22  
23  
24  
25  
26  
27  
28  
29  
30  
31  
32  
33  
34  
35  
36  
37  
38  
39  
40  
41  
42  
43  
44  
45  
46  
47

|                              |        |                                                                                                  |      |                       |                                                                                     |                 |                                                                                                                                                                                                                                                                                                                                                                                                                                                                                                                                                                                                                                                                                                                                                                                                                                             |
|------------------------------|--------|--------------------------------------------------------------------------------------------------|------|-----------------------|-------------------------------------------------------------------------------------|-----------------|---------------------------------------------------------------------------------------------------------------------------------------------------------------------------------------------------------------------------------------------------------------------------------------------------------------------------------------------------------------------------------------------------------------------------------------------------------------------------------------------------------------------------------------------------------------------------------------------------------------------------------------------------------------------------------------------------------------------------------------------------------------------------------------------------------------------------------------------|
|                              |        |                                                                                                  |      |                       |                                                                                     |                 | <p>Age group of 25–35 years was significantly associated with less insomnia scores (aOR = 0.77, 95% CI: 0.62-0.96) as compared to lower age group of 18–25 years. However, cigarette smoking was significantly associated with higher insomnia (aOR = 1.53, 95% CI: 1.25; 1.88) scores.</p> <p>physical activity of more than 3 times per week during lockdown were significantly associated with less insomnia (aOR = 0.65, 95% CI: 0.52; 0.83)</p> <p>Being a non-Lebanese was significantly associated with insomnia (aOR = 1.42, 95% CI: 1.12; 1.81)</p> <p>Drinking 2L of water or more during lockdown was significantly associated with lower insomnia (aOR = 0.76, 95% CI: 0.65; 0.88)</p> <p>No change in body weight status during lockdown was significantly associated with lower insomnia (aOR = 0.71, 95% CI: 0.58; 0.86)</p> |
| Yurumez Korkmaz et al., 2021 | Turkey | Participants (n = 136; 82 females, 60.3%) had a mean age of 73.4 ± 5.9 years. (Geriatric sample) | 136  | Cross-sectional study | Survey items developed by the study's author including questions on sleep problems. | Sleep disorders | <p>Sleep problems (P = 0.000) were more common in participants with depression and anxiety.</p> <p>Sleep problems were present in one third of our study population, and found to be statistically significantly higher among patients with depression and anxiety. Sleep problems, which may be a component of psychological distress, have been found to be common in elderly people due to social isolation.<sup>32</sup> Also, restricted physical activities and concerns about COVID-19 may lead to sleep disorders.</p>                                                                                                                                                                                                                                                                                                              |
| Zach et al., 2021            | Israel | Participants were 1202 people, 381 males and 821 females, aged 45–90.                            | 1202 | Cross-sectional study | Survey items developed by the study's author including questions on sleep duration. | Sleep duration  | <p>During the time of lockdown sleeping hours increased.</p> <p>Among the younger participants, a positive relationship was found between physical activity and the number of sleeping hours, while in the older ones a positive relationship was found between inactivity and the duration of sleep.</p>                                                                                                                                                                                                                                                                                                                                                                                                                                                                                                                                   |

| Healthcare workers      |                     |                                                                                                                                                                                                                                                                                                           |             |                       |                                                                                     |                      |                                                                                                                                                                                                                                                                                                                                                                                                                                                                                                                                                                                                                                                        |
|-------------------------|---------------------|-----------------------------------------------------------------------------------------------------------------------------------------------------------------------------------------------------------------------------------------------------------------------------------------------------------|-------------|-----------------------|-------------------------------------------------------------------------------------|----------------------|--------------------------------------------------------------------------------------------------------------------------------------------------------------------------------------------------------------------------------------------------------------------------------------------------------------------------------------------------------------------------------------------------------------------------------------------------------------------------------------------------------------------------------------------------------------------------------------------------------------------------------------------------------|
| Reference               | Location of Study   | Population                                                                                                                                                                                                                                                                                                | Sample Size | Study Design          | Sleep Health Measurement Tool                                                       | Sleep Health Domains | Main Findings                                                                                                                                                                                                                                                                                                                                                                                                                                                                                                                                                                                                                                          |
| Aarafa et al., 2021     | Egypt, Saudi Arabia | This study included 426 HCWs (275 from Egypt and 151 from Saudi Arabia) distributed as follows: 206 (48.4%) physicians, 103 (24.2%) nurses, and 117 (27.4%) other HCWs. Of them, 47.2% were aged $\leq 30$ years, 50.2% were men, 65% were living with children, and 51.6% were living with older adults. | 426         | Cross-sectional study | Survey items developed by the study's author including questions on sleep duration. | Sleep duration       | 37.3% had inadequate sleeping (<6 h/day). Female sex, age $\leq 30$ years, working in Egypt, attending emergency and night shifts, watching/reading COVID-19 news $\geq 2$ h/day, and not getting emotional support from family, society, and hospital were associated with a high likelihood of inadequate sleeping.                                                                                                                                                                                                                                                                                                                                  |
| Abbas et al., 2021      | Kuwait              | 217 HCWs at Kuwait MOH hospitals completed the survey with mean ( $\pm$ standard deviation) age of 35.8 ( $\pm 7.3$ ) years; 56.2% were male                                                                                                                                                              | 217         | Cross-sectional study | Pittsburgh Sleep Quality Index                                                      | Sleep Quality        | 64 experienced sleep difficulties before COVID-19 crisis and 21 (9.68%) had a history of consuming medication for sleep difficulties. Prevalence of poor SQ during the COVID-19 pandemic and its stresses increased to 171 (78.8%), with a global PSQI score mean (SD) of 9.36 $\pm$ 4.4; the worst components of SQ were sleep latency, duration, and efficacy. HCWs with poor sleep had higher weekly working hours compared with those with good sleep (67.25% versus 47.83, $p = 0.015$ ). Among the 32 participants who did swabs for suspected COVID-19 patients during their duties, 30 (93.75%) of them ( $p = 0.01$ ) experienced poor sleep. |
| Abdelghani et al., 2021 | Egypt               | 218 HCWs from Egypt.. The mean age of the participants was 39.5 $\pm$ 8.5 years. The majority were females ( $n = 156$ ,                                                                                                                                                                                  | 218         | Cross-sectional study | short health anxiety inventory (SHAI)                                               | Sleep duration       | Those who reported higher levels of health anxiety to COVID-19 virus infection were more likely to be identified as working more days weekly (5.7 $\pm$ 0.8 days) and having lower sleeping hours (6.8 $\pm$ 0.9 hours).                                                                                                                                                                                                                                                                                                                                                                                                                               |

|                         |              |                                                                                                                                                                                                                                                     |     |                       |                                                                                |                                                                   |                                                                                                                                                                                                                                                                                                                                                                                                                                                                                  |
|-------------------------|--------------|-----------------------------------------------------------------------------------------------------------------------------------------------------------------------------------------------------------------------------------------------------|-----|-----------------------|--------------------------------------------------------------------------------|-------------------------------------------------------------------|----------------------------------------------------------------------------------------------------------------------------------------------------------------------------------------------------------------------------------------------------------------------------------------------------------------------------------------------------------------------------------------------------------------------------------------------------------------------------------|
|                         |              | 72%), nurses (n=111, 51%), and married (n=192, 88%)                                                                                                                                                                                                 |     |                       |                                                                                |                                                                   |                                                                                                                                                                                                                                                                                                                                                                                                                                                                                  |
| Abdoli et al., 2021     | Iran         | A total of 321 full-time frontline hospital staff members in Farabi Hospital (mean age: 36.86; 58% females)                                                                                                                                         | 321 | Cross-sectional study | Athens Insomnia Scale                                                          | Sleep problems (insomnia)                                         | Of the 321 participants, 44 (13.7%) had an insomnia score of 0 to 5 points; 272 (86.3%) had a score of six points and higher. The odds to report insomnia was 3.14-fold higher (CI: 2.64–3.75) among participants compared to the general population.                                                                                                                                                                                                                            |
| Abu-Elenin et al., 2021 | Egypt        | 237 physicians, their mean age was 38.2 ± 6.2 years and 58% of them were males.                                                                                                                                                                     | 237 | Cross-sectional study | Electronic questionnaire on mental health including quesitons on sleep quality | Sleep quality                                                     | The mean rate for sleep quality were poor; at 6.5 ± 3.2 out of 10                                                                                                                                                                                                                                                                                                                                                                                                                |
| Al Ammari et al., 2020  | Saudi Arabia | 720 complete responses. 194 (26.94%) Physicians, 262 (36.39%) Nurses, and 171 (23.75%) pharmacists completed the survey. The participants' female respondents (64.17%) were almost double the males (35.83%), with nearly 75% above 30 years of age | 720 | Cross-sectional study | Insomnia severity index                                                        | Sleep problems (insomnia)                                         | The largest proportion of health care workers (85.83%) experienced absence to subthreshold insomnia (57.08 and 28.75%, respectively). The rest (14.16%) reported moderately severe to severe insomnia (10.41% and 3.75%, respectively)                                                                                                                                                                                                                                           |
| Al Maqbali et al., 2021 | Oman         | Frontline nurses, majority were female (90.7%, n = 895), and were married (85%, n = 839). The largest age group was those aged 31–40 years (59.5%, n = 587), followed by 41–50 years (20.1%, n = 198)                                               | 987 | Cross-sectional study | Pittsburgh Sleep Quality Index                                                 | Sleep quality<br>Sleep duration<br>Sleep problems (sleep latency) | 580 (58.8%) experienced poor sleep quality<br>Average sleep duration was 7.04 (SD = 1.59) hours per night with 61.3% (n = 605) of participants reporting sleep of less than 7 h.<br>Mean of sleep latency was 38 min, with 71.4% (n = 705) of the participants reporting more than 15 min.<br>23.7% of the participants reported a sleep efficiency of less than 85%<br>30% rated their quality of sleep as “fairly bad” or “very bad”.<br>The two most common reasons for sleep |

|                        |                      |                                                                                                                                                                                                                                              |     |                       |                                                                                                       |                                 |                                                                                                                                                                                                                                                                                                                                                                |
|------------------------|----------------------|----------------------------------------------------------------------------------------------------------------------------------------------------------------------------------------------------------------------------------------------|-----|-----------------------|-------------------------------------------------------------------------------------------------------|---------------------------------|----------------------------------------------------------------------------------------------------------------------------------------------------------------------------------------------------------------------------------------------------------------------------------------------------------------------------------------------------------------|
|                        |                      |                                                                                                                                                                                                                                              |     |                       |                                                                                                       |                                 | disturbance were “could not get to sleep within 30 min”, and “waking up in the middle of the night or early morning” as reported by 56.03% and 54.31%.                                                                                                                                                                                                         |
| Alghufli et al., 2021  | United Arab Emirates | A total of 400 HCW completed the survey. Majority of them were females (84.5%, n = 338) and aged between 18 and 31 (53.5%, n = 214).                                                                                                         | 400 | Cross-sectional study | Insomnia Severity Index                                                                               | Sleep disorder (insomnia)       | 187 (46.8%) suffered from clinical insomnia HCWs in the fever clinic that had sub-threshold insomnia (26.4%, n = 14). While at the clean and mixed clinics, HCWs had subthreshold insomnia (38.2%, n = 47). Among the 3 HCWs working at telemedicine clinic, insomnia levels were between subthreshold and moderately severe (33.3%, n = 1 for each category). |
| Ali et al., 2021       | Saudi Arabia         | Out of 200 healthcare providers, 40% were males. 52% were aged 31–40 years old, 61% were married. The majority of the participants were Saudi nationals (84%), 74% were nurses, 11% were physicians and 15% were other healthcare providers. | 200 | Cross-sectional study | Insomnia Severity Index                                                                               | Sleep disorder (insomnia)       | Working as a physician was associated with insomnia (OR, 2.32; 95% CI, 0.89–6.07; P = < 0.05)                                                                                                                                                                                                                                                                  |
| Aljuffali et al., 2022 | Saudi Arabia         | 502 pharmacists were included in the present study. Their mean ( $\pm$ SD) age was 31 ( $\pm$ 8) years. Most respondents were female (51.8%). Moreover, most respondents were Saudi pharmacists (88.9%)                                      | 502 | Cross-sectional study | Survey items developed by the study's author including questions on sleep duration and sleep quality. | Sleep quality<br>Sleep duration | Sleeping disturbances were found to be related to high burnout levels                                                                                                                                                                                                                                                                                          |
| Almater et al., 2021   | Saudi Arabia         | One hundred and seven ophthalmologists successfully completed the survey with a response rate of 30.6%. Males constituted 56.1% (n = 60). Ophthalmology                                                                                      | 107 | simple random study   | Insomnia Severity Index                                                                               | Sleep problems (insomnia)       | Overall prevalence of insomnia was 44.9%; 32 had subthreshold symptoms (29.9%), 14 had moderate symptoms (13.1%), and 2 had severe symptoms (1.9%).<br><br>There was also a trend to experience symptoms of                                                                                                                                                    |

|                         |        |                                                                                                                                                                                                                   |      |                       |                                                                                    |                                                              |                                                                                                                                                                                                                                                                                                                                                                                                                                                                                                             |
|-------------------------|--------|-------------------------------------------------------------------------------------------------------------------------------------------------------------------------------------------------------------------|------|-----------------------|------------------------------------------------------------------------------------|--------------------------------------------------------------|-------------------------------------------------------------------------------------------------------------------------------------------------------------------------------------------------------------------------------------------------------------------------------------------------------------------------------------------------------------------------------------------------------------------------------------------------------------------------------------------------------------|
|                         |        | residents constituted the majority (n = 66, 61.7%)                                                                                                                                                                |      |                       |                                                                                    |                                                              | insomnia in frontline health-care providers (P = 0.129)                                                                                                                                                                                                                                                                                                                                                                                                                                                     |
| Almhdawi et al., 2022   | Jordan | 326 physicians of all Jordanian medical sectors and specialties successfully completed all of the study survey sections with a mean age of 32.08 (±6.93) ranged between 24–70 years and 44.2% of them were males. | 326  | Cross-sectional study | Survey items developed by the study's author including questions on sleep quality. | Sleep quality                                                | poor sleep quality (58.3%)                                                                                                                                                                                                                                                                                                                                                                                                                                                                                  |
| Alshekaili et al., 2020 | Oman   | 1139 HCWs, 228 (20.0%) are males, and 911 (80.0%) are females. Their average age was 36.3±6.5 (mean±SD) ranging from 21 to 65 years. The majority were Omani (n=981, 86.1%) and were married (n=987, 86.9%).      | 1139 | Cross-sectional study | Insomnia Severity Index.                                                           | Sleep disorder (insomnia)                                    | 211 (18.5%) respondents were reported to have insomnia. HCWs in the frontline group were 1.5 times more likely to report insomnia (OR=1.586, p=0.013) as compared with those in the non-frontline group.                                                                                                                                                                                                                                                                                                    |
| Amra et al., 2021       | Iran   | Among the 372 HCW participants, 245 (66%) were women and mean age was 34.5 ± 7.1 years (age range 23 to 58).                                                                                                      | 372  | Cross-sectional study | Pittsburgh Sleep Quality Index<br>Insomnia Severity Index                          | Sleep quality<br>Sleep duration<br>Sleep disorder (Insomnia) | Those participants who were directly caring for the patients including physicians and nurses had significantly higher PSQI but lower ISI questionnaire scores relative to other participants. PSQI were significantly higher in the HCWs with positive coronavirus PCR ISI were significantly lower in the HCWs with positive Coronavirus RT-PCR than another group Positive association between COVID-like symptoms and sleep and mood disturbances was found in the group without a positive test result. |
| Araç et al., 2020       | Turkey | 210 volunteers, including 105 healthcare professionals in the emergency department (53.8% female) and 105 healthcare professionals                                                                                | 210  | Cross-sectional study | Pittsburgh Sleep Quality Index (PSQI)                                              | Sleep disorder                                               | PSQI subscale scores of the participants in the primary group were significantly higher than those of participants in the secondary group.                                                                                                                                                                                                                                                                                                                                                                  |

|                            |        |                                                                                                                                                                                                                                                                           |     |                       |                                    |                           |                                                                                                                                                                                                                                                                                                                                                                                                                                                                                                                                                                                                |
|----------------------------|--------|---------------------------------------------------------------------------------------------------------------------------------------------------------------------------------------------------------------------------------------------------------------------------|-----|-----------------------|------------------------------------|---------------------------|------------------------------------------------------------------------------------------------------------------------------------------------------------------------------------------------------------------------------------------------------------------------------------------------------------------------------------------------------------------------------------------------------------------------------------------------------------------------------------------------------------------------------------------------------------------------------------------------|
|                            |        | working in other departments (46.2% females) rendering services for COVID-19 patients.                                                                                                                                                                                    |     |                       |                                    |                           |                                                                                                                                                                                                                                                                                                                                                                                                                                                                                                                                                                                                |
| Aslan et al., 2022         | Turkey | 845 nurses completed the questionnaire. In total, 72.2% of the nurses were female, 78% were graduates, 57.2% were single, 53.8% had a medium-income level, 69.7% were working in a state hospital, and 7.6% had a chronic disease.                                        | 845 | Cross-sectional study | Bergen Insomnia Scale              | Sleep disorder (insomnia) | A positive correlation was found between COVID-19 Fear Scale and the Bergen Insomnia Scale ( $r = .392$ ; $p = .001$ ). The relationship between COVID-19 Fear and Bergen Insomnia Scale score averages and nurses' educational status, income level, shift working status, the status of their relatives being diagnosed with COVID-19, the state of being satisfied with the management of the pandemic process by the Ministry of Health, the situation of having resources in the settings where they work, the status of being in quarantine was statistically significant ( $p < .05$ ). |
| Aydin Sayilan et al., 2021 | Turkey | 267 nurses<br>The mean age of the nurses in this study was $28.03 \pm 5.99$ y (min: 21; max: 51), 75.3% were female, 63.3% were single, and 72.7% held an undergraduate degree.                                                                                           | 267 | Cross-sectional study | The Pittsburgh Sleep Quality Index | Sleep quality             | Nurses mostly experienced emotional exhaustion, and burnout levels increased in line with insomnia.                                                                                                                                                                                                                                                                                                                                                                                                                                                                                            |
| Åzahin et al., 2020        | Turkey | Six hundred twenty (66.0%) of the 939 HCWs taking part in this study were female, 339 (36.1%) were aged 26–30, 617 (65.7%) were married, 580 (61.8%) were physicians, 820 (87.3%) were working in an urban area, and 529 (56.3%) had been working for less than 10 years. | 939 | Cross-sectional study | Insomnia Severity Index            | Sleep disorder (insomnia) | 473 (50.4%) experienced insomnia symptoms<br>Female gender, having tested for COVID-19, and history of psychiatric illness emerged as risk factors for insomnia.<br>Nurses and frontline workers had a significantly higher insomnia score than other groups.                                                                                                                                                                                                                                                                                                                                  |
| Badahdah et                | Oman   | Examined sleep quality in                                                                                                                                                                                                                                                 | 150 | Cross-                | Sleep Quality                      | Sleep quality             | HCWs who scored 10 or higher on the 7-item                                                                                                                                                                                                                                                                                                                                                                                                                                                                                                                                                     |



|                                                                                        |                     |        |                                                                                                                                                                                                                             |     |                       |                                |                                 |                                                                                                                                                                                                                                                                                                |
|----------------------------------------------------------------------------------------|---------------------|--------|-----------------------------------------------------------------------------------------------------------------------------------------------------------------------------------------------------------------------------|-----|-----------------------|--------------------------------|---------------------------------|------------------------------------------------------------------------------------------------------------------------------------------------------------------------------------------------------------------------------------------------------------------------------------------------|
| 1<br>2<br>3<br>4<br>5<br>6<br>7<br>8<br>9<br>10<br>11<br>12                            | al., 2020           |        | a sample of 150 physicians (39.3%) and nurses (60.7%) who cared for patients with COVID-19 in Oman. Females made up 77.3% of participants. The average age was 37.62 years (standard deviation [SD] = 7.79 years).          |     | sectional study       | Scale                          |                                 | Generalized Anxiety Disorder Scale scored lower on sleep quality (mean = 5.98, SD = 2.29)<br>HCWs who scored less than 50 on the WHO-5 had a lower score on sleep quality (mean = 6.29, SD = 2.08)<br>The mean SQS score of 7 indicates that 40.1% of participants had poor sleep quality      |
| 13<br>14<br>15<br>16<br>17<br>18<br>19<br>20<br>21<br>22                               | Barut et al., 2021  | Turkey | There were 213 volunteers in of a healthcare team providing service for COVID-19 patients, females 60.9%.<br>163 healthcare team working without direct contact with COVID-19 patients, females 47.5%.                      | 379 | Cross-sectional study | Jenkins Sleep Scale            | Sleep quality<br>Sleep problems | Sleep problems and stress levels were significantly higher among healthcare professionals who had direct contact with COVID-19 (+) patients compared to those who did not (P<0.05).                                                                                                            |
| 23<br>24<br>25<br>26<br>27<br>28<br>29<br>30<br>31<br>32                               | Bilgiç et al., 2021 | Turkey | The average age of the nurses in this study was 32.24±8.41 years (min: 19; max: 56) and the average years worked was 10.31±9.08 years. 84.9%of the nurses were female, 50.0%were married, and 74.9%had a bachelor's degree. | 316 | Cross-sectional study | Pittsburgh Sleep Quality Index | Sleep quality                   | It was found that the average PSQI score of the nurses was 7.36±3.35 (min=1, max=20) a positively significant correlation was found between the average PSQI score of nurses and the PSS score. These findings suggest that nurses perceive high levels of stress and have poor sleep quality. |
| 33<br>34<br>35<br>36<br>37<br>38<br>39<br>40<br>41<br>42<br>43<br>44<br>45<br>46<br>47 | Bulut et al., 2021  | Turkey | Of the 348 healthcare professionals, 176 (50.6%) were women and 172 (49.4%) men, while 190 (54.6%) were doctors and 158 (45.4%) nurses. And 350 participants in the control group, 163 women (46.9%) and 186                | 698 | Cross-sectional study | Insomnia Severity Index        | Sleep disorder (insomnia)       | Healthcare professionals: 44 had insomnia (%12.6)<br>Nonhealthcare professionals: 45 had insomnia (%12.9)<br>Insomnia were found to be statistically significantly higher amongst those working in the "area of final diagnosis" (P = .002)                                                    |

|                   |      |                                                                                                                                                                                                                                                                                                                                                                                                                                                                                                                                                                                                                                                                                                                                                                                                                                                                                                                                          |      |                       |                         |                           |                                                                                                                                                                                                                                                                                               |
|-------------------|------|------------------------------------------------------------------------------------------------------------------------------------------------------------------------------------------------------------------------------------------------------------------------------------------------------------------------------------------------------------------------------------------------------------------------------------------------------------------------------------------------------------------------------------------------------------------------------------------------------------------------------------------------------------------------------------------------------------------------------------------------------------------------------------------------------------------------------------------------------------------------------------------------------------------------------------------|------|-----------------------|-------------------------|---------------------------|-----------------------------------------------------------------------------------------------------------------------------------------------------------------------------------------------------------------------------------------------------------------------------------------------|
|                   |      | men (53.1%)                                                                                                                                                                                                                                                                                                                                                                                                                                                                                                                                                                                                                                                                                                                                                                                                                                                                                                                              |      |                       |                         |                           |                                                                                                                                                                                                                                                                                               |
| Chan et al., 2021 | Oman | <p>A total of 1132 participants returned their completed questionnaire. A two-step cluster analysis was used to split the sample into three clusters. Clusters A, B and C contained 416 (36.7%), 412 (36.4%) and 304 (26.9%) HCWs, respectively. Cluster A was characterized by HCWs who were older (Mean <math>\pm</math> SD, 37.3 <math>\pm</math> 7.0 years) with more working experience (13.6 <math>\pm</math> 7.1 years) in the health-care setting. more than 84% (n = 353) had not handled any COVID-19 cases during the pandemic period. Cluster B was mostly around 36 years of age (SD = 6.3). The majority were physicians (43.4%, n = 179) or nurses (42.5%, n = 175) All were working in the frontline, and more than 60% (n = 257) had experienced COVID-19 cases in the pandemic. In Cluster C, most HCWs were nurses (44.1%, n = 134) and working in the tertiary care hospital (44.4%, n = 135). They were younger</p> | 1132 | Cross-sectional study | Insomnia Severity Index | Sleep disorder (insomnia) | <p>Cluster A: The majority did not report any symptoms of clinical insomnia (97.6%, n = 406)<br/> Cluster B: The majority did not report any symptoms of clinical insomnia (96.6%, n = 398)<br/> Cluster C: The majority reported clinical insomnia (60.2%, n = 183) during the pandemic.</p> |

|                           |        |                                                                                                                                                                                                                                                                   |      |                       |                                                                                     |                           |                                                                                                                                                                                                                                                                                                                                                                                                                                                                                                                                                                                                             |
|---------------------------|--------|-------------------------------------------------------------------------------------------------------------------------------------------------------------------------------------------------------------------------------------------------------------------|------|-----------------------|-------------------------------------------------------------------------------------|---------------------------|-------------------------------------------------------------------------------------------------------------------------------------------------------------------------------------------------------------------------------------------------------------------------------------------------------------------------------------------------------------------------------------------------------------------------------------------------------------------------------------------------------------------------------------------------------------------------------------------------------------|
|                           |        | (34.8 ± 5.7 years) and with less working experience (11.9 ± 5.9 years)<br>There were around 50% (n = 159) working in the frontline only.                                                                                                                          |      |                       |                                                                                     |                           |                                                                                                                                                                                                                                                                                                                                                                                                                                                                                                                                                                                                             |
| Dolev et al., 2021        | Israel | Medical residents treating COVID-19: 20 internal medicine physicians, 7 physicians working in emergency departments. The non-COVID group: 31 internal medicine, 16 physicians working in emergency departments, 8 psychiatrists, 16 gynecologists, and 7 surgeons | 105  | Cohort study          | Pittsburgh Sleep Quality Index (PSQI)                                               | Sleep quality             | COVID-19 group had longer sleep duration (95% CI: COVID-19: 1.44–1.94 vs non-COVID-19: 0.15–0.37; U (27,64) = 313.00, P < 0.0001), longer sleep onset latency (95% CI: COVID-19: 1.75–2.01 vs non-COVID-19: 0.68–0.94; U (27,64) = 326.50, P < 0.0001), deteriorated daily function (95% CI: COVID-19: 2.54–2.91 vs non-COVID-19: 1.28–1.60; U(27,64) = 143.00, P < 0.0001), poorer sleep quality (95% CI: COVID-19: 2.75–3.01 vs non-COVID-19: 1.74–2.10; U(27,64) = 258.00, P < 0.0001), and worse global PSQI score (95% CI: COVID-19: 9.97–11.25 vs non-COVID-19: 4.57–5.27; t(89) = 9.751, P < 0.0001) |
| Durmaz Engin et al., 2021 | Turkey | 360 actively working ophthalmologists. While 64% of them worked in the pandemic hospitals, 44% were actively involved in COVID-related departments.                                                                                                               | 360  | Cross-sectional study | Insomnia Severity Index                                                             | Sleep disorder (insomnia) | Symptoms of insomnia were present in 46.9% of participants. Ophthalmologists working in a pandemic hospital were more likely to experience insomnia. Higher insomnia scores in female responders (p=0.002) and in those with a chronic disease (p=0.004). Higher levels of satisfaction with the hygiene conditions in COVID and the ophthalmology clinics lower ISI scores (p=0.004)                                                                                                                                                                                                                       |
| Elghazally et al., 2021   | Egypt  | Sample included 2331 physicians; 1177 of whom worked in front line hospitals (group II) and the remaining 1154 physicians (group I) in other health facilities (second line). The mean age of the participants is 34.3 ± 6.1                                      | 2331 | Cross-sectional study | Survey items developed by the study's author including questions on sleep duration. | Sleep duration            | In group I and group II (45.1% and 40.1% respectively) were at risk of falling or staying asleep or sleeping excessively.                                                                                                                                                                                                                                                                                                                                                                                                                                                                                   |

|                       |        |                                                                                                                                                                                                                                                                                                             |     |                       |                                                                                     |                           |                                                                                                                                                                                                                                                                                                                                        |
|-----------------------|--------|-------------------------------------------------------------------------------------------------------------------------------------------------------------------------------------------------------------------------------------------------------------------------------------------------------------|-----|-----------------------|-------------------------------------------------------------------------------------|---------------------------|----------------------------------------------------------------------------------------------------------------------------------------------------------------------------------------------------------------------------------------------------------------------------------------------------------------------------------------|
|                       |        | years. The majority of participants in group I and group II were in age group between 30 and 40 years (70.6% and 55%, respectively). In both groups, the majority of participants were females, married, urban dwellers, and specialists                                                                    |     |                       |                                                                                     |                           |                                                                                                                                                                                                                                                                                                                                        |
| Elgohary et al., 2021 | Egypt  | 270 health care workers (HCWs). The studied group age ranged from 18 to 52 years with mean $34.98 \pm 6.27$ years. 57% of HCWs were female. More than 72% of them had post-graduate education. Most frequent occupations among the participants were physicians and nurses (70.7% and 16.3%, respectively). | 270 | Cross-sectional study | Survey items developed by the study's author including questions on sleep duration. | Sleep duration            | There was a statistical significant decrease in sleep hours among HCWs with severe and extremely severe depression.                                                                                                                                                                                                                    |
| Elkholy et al., 2021  | Egypt  | 502 HCW dealing with COVID-19 in 20 hospitals in different parts of egypt; 60.0% were physicians, 16.1% were specialized nurses, and 23.9% were non-specialized nurses. About 35.3% worked in chest hospitals, 17.5% in fever hospitals, and 47.2% in quarantine hospitals.                                 | 502 | Cross-sectional study | Insomnia Severity Index                                                             | Sleep disorder (insomnia) | According to the insomnia severity scale 320 (67.7%) showed positive results; 195 (41.2%) were sub-threshold, 101 (21.4%) were moderate and 24 (5.1%) were severe. Participants with age group (31–40) were at higher risk of severe insomnia compared to those with >40 years old participants (OR, 2.79; 95% CI, 1.02–7.66; p = .01) |
| Hawari et al., 2021   | Jordan | 937 practitioners (56.1% females). Approximately 68%, 14%, and 18% were nurses/technicians,                                                                                                                                                                                                                 | 937 | Cross-sectional study | Survey items developed by the study's author including                              | Sleep quality             | Sleep disturbances were reported (in past seven days) by approximately 29% of subjects.                                                                                                                                                                                                                                                |

|                        |         |                                                                                                                                                                                                               |     |                       |                                    |                           |                                                                                                                                                                                                                                                                                                                                                                                                                                                                                                                                   |
|------------------------|---------|---------------------------------------------------------------------------------------------------------------------------------------------------------------------------------------------------------------|-----|-----------------------|------------------------------------|---------------------------|-----------------------------------------------------------------------------------------------------------------------------------------------------------------------------------------------------------------------------------------------------------------------------------------------------------------------------------------------------------------------------------------------------------------------------------------------------------------------------------------------------------------------------------|
|                        |         | physicians, and pharmacists (respectively).                                                                                                                                                                   |     |                       | questions on sleep-related issues. |                           |                                                                                                                                                                                                                                                                                                                                                                                                                                                                                                                                   |
| Jahrami et al., 2021   | Bahrain | A total of 257 participants (129 FLHCW and 128 NFLHCW)                                                                                                                                                        | 280 | Cross-sectional study | Pittsburgh Sleep Quality Index     | Sleep quality             | The FLHCW scored higher in the PSQI and PSS compared with the NFLHCW; however, the difference in the PSQI score was not statistically significant.<br>For the FLHCW, 75% were poor sleepers, 85% had moderate-severe stress, and 61% had both poor sleep quality and moderate-severe stress. For the NFLHCW, 76% were poor sleepers, 84% had moderate-severe stress, and 62% had both poor sleep quality and moderate-severe stress. Female sex and professional background were the predictors of poor sleep quality and stress. |
| Kandemir et al., 2022  | Turkey  | The study was performed with 194 nurses working in the intensive care units of five hospitals in Istanbul.                                                                                                    | 194 | Cross-sectional study | Insomnia Severity Index            | Sleep disorder (insomnia) | 39.7% of the nurses experienced moderate (21.6%) or severe insomnia (18.1%).                                                                                                                                                                                                                                                                                                                                                                                                                                                      |
| Karabulut et al., 2021 | Turkey  | 210 health care professionals working in ICUs were included in the study. Of the participants, 159 (75.4%) were female, and 185 (88.1%) were nurses. The mean age of the participants was 27.04 ± 5.71 years. | 210 | Cross-sectional study | Visual analog sleep scale          | Sleep quality             | a positive relationship was found between state anxiety and sleep (r = 0.158, p = 0.022)<br><br>The mean perceived visual analog sleep score was moderate and found as 503.79 ± 134.24                                                                                                                                                                                                                                                                                                                                            |
| Khamis et al., 2020    | Oman    | 402 female doctors and nurses recruited from several health facilities in Oman.<br>A total of 231 (57.5%) Omanis and 171 (42.5%) non-Omanis participated in this study. Of the total 402 participants, 28.4%  | 402 | Cross-sectional study | Sleep Quality Scale                | Sleep quality             | 39.3% had poor sleep quality; this was particularly prevalent among Omanis.<br>A multiple regression analysis revealed that anxiety, stress, and well-being were significant predictors of poor sleep quality.                                                                                                                                                                                                                                                                                                                    |

|                      |              |                                                                                                                                                                                                                                                                                                                        |      |                                |                                                                                            |                            |                                                                                                                                                                                                                                                                                                                                                                                                                                                                                                                                                                                                                    |
|----------------------|--------------|------------------------------------------------------------------------------------------------------------------------------------------------------------------------------------------------------------------------------------------------------------------------------------------------------------------------|------|--------------------------------|--------------------------------------------------------------------------------------------|----------------------------|--------------------------------------------------------------------------------------------------------------------------------------------------------------------------------------------------------------------------------------------------------------------------------------------------------------------------------------------------------------------------------------------------------------------------------------------------------------------------------------------------------------------------------------------------------------------------------------------------------------------|
|                      |              | were physicians and 71.6% were nurses. One in four (27.9%) participants reported caring for COVID-19 patients                                                                                                                                                                                                          |      |                                |                                                                                            |                            |                                                                                                                                                                                                                                                                                                                                                                                                                                                                                                                                                                                                                    |
| Meo et al., 2021     | Saudi Arabia | HCWs: 859 (51.2%) females, and 819 (48.8%) males                                                                                                                                                                                                                                                                       | 1678 | Observational-analytical study | Pittsburgh Sleep Quality Index (PSQI)                                                      | Sleep quality              | 1376 (82.0%) of the HCWs had poor sleep quality ( $\geq 5$ global PSQI score). The results show that 975 (58.10%) were frontline HCWs, and 407 (23.89%) were second-line HCWs who suffered from poor sleep quality. The highest poor sleep quality levels were identified among HCWs who work in frontline areas (emergency departments, intensive care units, and wards) (642 (84.6%)), in comparison with others who work in second-line areas (734 (79.9%)). 585 (85.7%) HCWs directly involved were suffering from poor sleep quality in comparison with 791 (79.5%) non-directly involved healthcare workers. |
| Mosheva et al., 2020 | Israel       | 1106 Israeli physicians (564 males and 542 females) during the COVID-19 outbreak.                                                                                                                                                                                                                                      | 1106 | Cross-sectional study          | Survey items developed by the study's author including questions on sleeping difficulties. |                            | Found a positive association between sleep difficulties and higher levels of anxiety among physicians.<br><br>Sleeping difficulties score $(1.81/5) \pm 0.88$                                                                                                                                                                                                                                                                                                                                                                                                                                                      |
| Mousavi et al., 2021 | Iran         | 321 HCWs from major tertiary hospitals in Isfahan which were dedicated to COVID-19 patients. The mean age of participants was 33.5 years (SD: 7.65, range: 23–65). The mean of working experience in our study sample was 6.7 years (SD: 6.20, range: 1–30). In the study sample, 236 (73.8%) participants were female | 321  | Cross-sectional study          | Insomnia Severity Index                                                                    | Sleep disorders (insomnia) | The mean score of ISI was 10.3 (SD: 5.95, range: 0–25), and just 123 (38.8%) participants had normal sleep.<br><br>The Pearson correlation analysis revealed that there is a statistically significant correlation between GHQ-12 and age ( $r: -0.12, P: 0.02$ ), working year ( $r: -0.12, P: 0.03$ ), ISI score ( $r: 0.56, P: 0.000$ ), and social support score ( $r: -0.27, P: 0.000$ )                                                                                                                                                                                                                      |

|                        |        |                                                                                                                                                                                                                                                                                                            |     |                       |                         |                           |                                                                                                                                                                                                                                                                                                                                                                                                                                                                                                                |
|------------------------|--------|------------------------------------------------------------------------------------------------------------------------------------------------------------------------------------------------------------------------------------------------------------------------------------------------------------|-----|-----------------------|-------------------------|---------------------------|----------------------------------------------------------------------------------------------------------------------------------------------------------------------------------------------------------------------------------------------------------------------------------------------------------------------------------------------------------------------------------------------------------------------------------------------------------------------------------------------------------------|
|                        |        | and 156 (48.6%) of them were a nurse.                                                                                                                                                                                                                                                                      |     |                       |                         |                           |                                                                                                                                                                                                                                                                                                                                                                                                                                                                                                                |
| Nashwan et al., 2021   | Qatar  | A total of 200 nurses participated in the study (response rate 13.3%). About 74.5% of nurses were working in COVID-19 facilities. Around 19.0%, 65.5%, and 15.5% of nurses were aged 20–30, 31–40, and above 40 years, respectively. About 59.5% and 80.0% of nurses were males and married, respectively. | 200 | Cross-sectional study | Insomnia Severity Index | Sleep disorder (insomnia) | In this study, there were no significant differences in sleep quality, stress, anxiety, depression, and perceived social support between nurses working in COVID-19 and non-COVID-19 facilities in Qatar                                                                                                                                                                                                                                                                                                       |
| Oteir et al., 2022     | Jordan | A total of 122 HCWs participated in the study (response rate=64.2%). Among the participants, 44.3% were physicians, 32.8% were nurses and 17.2% were paramedics. The mean age of participants was 32.1 (±5.8) years, and the majority were males (80.3%)                                                   | 122 | Cross-sectional study | Insomnia Severity Index | Sleep disorder (insomnia) | insomnia (31.9%), with increased severity of insomnia among paramedics<br><br>Mean score of ISI was 11.2 (±6.4)                                                                                                                                                                                                                                                                                                                                                                                                |
| Sis Çelik et al., 2021 | Turkey | 211 nurses using a web-based online survey in Turkey (including 104 nurses working in wards where patients with COVID-19/107 nurses working in wards where patients without COVID-19).<br><br>It was determined that the average age                                                                       | 211 | Cross-sectional study | Post-Sleep Inventory    | Sleep disorders           | it was found that 31.8% of the Nurses involved in the study had very serious sleep problem during the COVID-19 period, and 21.3% had a moderate problem<br><br>When the sleep problems experienced were compared according to the Post-Sleep Inventory, it was determined that the difference between the groups was not statistically significant (p>0.05). There was a moderately significant and positive correlation between the nurses' mean scores for the COVID-19 Fear Scale and Post-Sleep Inventory. |

|                  |        |                                                                                                                                                                                                                                          |     |                       |                                                                                  |               |                                                                                                                                                                                                                                                                                                                                                                                                                                                                                                                                                                                                                                                                                                                                                                                                                                                                                                                                                                                                                                                                                                                                                                                                                                                                              |
|------------------|--------|------------------------------------------------------------------------------------------------------------------------------------------------------------------------------------------------------------------------------------------|-----|-----------------------|----------------------------------------------------------------------------------|---------------|------------------------------------------------------------------------------------------------------------------------------------------------------------------------------------------------------------------------------------------------------------------------------------------------------------------------------------------------------------------------------------------------------------------------------------------------------------------------------------------------------------------------------------------------------------------------------------------------------------------------------------------------------------------------------------------------------------------------------------------------------------------------------------------------------------------------------------------------------------------------------------------------------------------------------------------------------------------------------------------------------------------------------------------------------------------------------------------------------------------------------------------------------------------------------------------------------------------------------------------------------------------------------|
|                  |        | <p>of the nurses working in wards where patients with COVID-19 are hospitalized was 29.04±6.42.</p> <p>It was determined that the average age of nurses working in wards where patients without COVID-19 are admitted was 26.22±4.89</p> |     |                       |                                                                                  |               |                                                                                                                                                                                                                                                                                                                                                                                                                                                                                                                                                                                                                                                                                                                                                                                                                                                                                                                                                                                                                                                                                                                                                                                                                                                                              |
| Taş et al., 2021 | Turkey | 448 Family Physicians participated in the study. The average age of the participants in the study was 39.10 ± 9.59 (min 24, max 65).                                                                                                     | 448 | Cross-sectional study | Survey items developed by the study's author include questions on sleep quality. | Sleep quality | <p>While the rate of family physicians who evaluated sleep quality as very poor before the onset of the pandemic was 1.3% (n = 6), this rate increased to 13.8% during the pandemic process (n = 62). While the rate of those who reported sleep quality as poor before the pandemic was 12.7% (n = 57), this rate increased to 48.2% (n = 216) after the pandemic. While 65.4% (n = 293) of the family physicians participating in the study defined sleep quality as good before the pandemic, this rate decreased to 35.7% (n = 160) after the pandemic. While the rate of those who stated that the quality of sleep before pandemic was very good was 20.5% (n = 92), this rate decreased to 2.2% (n = 10) after the pandemic (p &lt; 0.001).</p> <p>Thinking that personal protective measures were insufficient (p = 0.000) and working as a practitioner as a professional title were the most important factors affecting the deterioration of sleep quality (p = 0.004). Age, gender, marital status, having a child, the institution of employment, the years spent in the profession, and having contact history with Covid-19 positive cases were not effective in impairing sleep quality (p &gt; 0.05).</p> <p>Family physicians whose workload dimension</p> |



|                                 |        |                                                                                                                                                                                                                                                                                                                            |     |                       |                                |                           |                                                                                                                                                                                                                                                                                                                                                                                                                                                                                                                                                                                                                                                                                                                                |
|---------------------------------|--------|----------------------------------------------------------------------------------------------------------------------------------------------------------------------------------------------------------------------------------------------------------------------------------------------------------------------------|-----|-----------------------|--------------------------------|---------------------------|--------------------------------------------------------------------------------------------------------------------------------------------------------------------------------------------------------------------------------------------------------------------------------------------------------------------------------------------------------------------------------------------------------------------------------------------------------------------------------------------------------------------------------------------------------------------------------------------------------------------------------------------------------------------------------------------------------------------------------|
|                                 |        |                                                                                                                                                                                                                                                                                                                            |     |                       |                                |                           | increased were the family physicians whose sleep quality deteriorated during the pandemic (p = 0.000).                                                                                                                                                                                                                                                                                                                                                                                                                                                                                                                                                                                                                         |
| Tasdemir Yigitoglu et al., 2021 | Turkey | 435 healthcare staff members. Their mean age turned out to be 36.76 ± 7.58. Slightly more than half of the participants were women (56.1%, n = 244), whereas 67.8% (n = 295) were married and 66.9% (n = 291) were parents.                                                                                                | 435 | Cross-sectional study | Pittsburg Sleep Quality Index  | Sleep quality             | <p>Their mean PSQI score was 8.42 ± 2.30, and poor sleep quality was identified in an overwhelming majority of the healthcare staff (92.9%, n = 404).</p> <p>As for the sleep quality scores derived from the PSQI data, strong evidence was found for the within-group differences in terms of gender (female healthcare staff suffer from poorer sleep quality), parenthood (poor sleep quality in the enrolled healthcare staff with children), years of experience in the current department, health-related problems, history of mental disorders, and job satisfaction (p &lt; 0.05)</p>                                                                                                                                 |
| Yilmaz et al., 2021             | Turkey | Four hundred thirty-four healthcare workers participated in the study, of whom 70.7% were under 35 years of age, 65.0% were female, 60.6% were married, 64.1% were physicians, 56.7% held a master's degree or above, 73.0% worked in a hospital, 50% worked on the frontline and 36.4% had 5-10 years' working experience | 278 | Cross-sectional study | Pittsburgh Sleep Quality Index | Sleep quality             | <p>The total prevalence of poor sleep quality was 56.7%</p> <p>The prevalence of poor sleep quality was 67.3% in nurses, 55.4% in physicians and 42.3% in dentists. Poor sleep quality was more prevalent among women, nurses, hospital workers, frontline workers, individuals with &lt;5 years of work experience, those with low social support and individuals with increased traumatic stress levels. High levels of social support and family social support were identified as protective factors against poor sleep quality. Multivariate regression analyses showed that poor sleep quality was significantly associated with working in hospitals and high traumatic stress levels during the COVID-19 pandemic.</p> |
| Yilmaz et al., 2021             | Turkey | 600 Healthcare workers participated in this study. 364 were females and 236 were males with a mean age of 33.49 ± 7.29 years.                                                                                                                                                                                              | 600 | Cross-sectional study | Insomnia Severity Index        | Sleep disorder (insomnia) | <p>Mean ISI score was significantly higher among HCWs working in COVID-19 clinics and intensive care units (p=0.000; p=0.039). Mean ISI score was significantly higher in women than men (p=0.000; p=0.000; p=0.027; p=0.005). Mean ISI scores was significantly higher among nurses (p=0.008; p=0.004).</p>                                                                                                                                                                                                                                                                                                                                                                                                                   |
| Youssef et al., 2020            | Egypt  | 540 healthcare professionals                                                                                                                                                                                                                                                                                               | 540 | Cross-sectional       | Insomnia Severity Index        | Sleep disorder (insomnia) | Just over one half of respondents (51.9%, n=280) reported sub-threshold insomnia to                                                                                                                                                                                                                                                                                                                                                                                                                                                                                                                                                                                                                                            |

|                      |         |                                                                                                                                                                                                                                                                                      |     |                       |                                |               |                                                                                                                                                                                                                                                                                                                                                                                                                                                                                                                                                                                                                                                                                                                                                                                                                                                                                                                                                                                                                                                                                                                                          |
|----------------------|---------|--------------------------------------------------------------------------------------------------------------------------------------------------------------------------------------------------------------------------------------------------------------------------------------|-----|-----------------------|--------------------------------|---------------|------------------------------------------------------------------------------------------------------------------------------------------------------------------------------------------------------------------------------------------------------------------------------------------------------------------------------------------------------------------------------------------------------------------------------------------------------------------------------------------------------------------------------------------------------------------------------------------------------------------------------------------------------------------------------------------------------------------------------------------------------------------------------------------------------------------------------------------------------------------------------------------------------------------------------------------------------------------------------------------------------------------------------------------------------------------------------------------------------------------------------------------|
|                      |         | <p>participated; their ages ranged from 20 to 70 years, with a mean of 37.3 (SD=9.2). The majority were male (54.4%, n=294), highly educated (postgraduate) (78.3%, n=423), physicians (77%, n=416), married (74.1%, n=400), had experience of five years or more (77.8%, n=420)</p> |     | study                 |                                |               | <p>severe insomnia. The quarantine group and the non-quarantine group had an insignificant difference in adverse psychological symptoms and insomnia.</p> <p>Insomnia was high among those who reported experiencing stress, depression and anxiety (P&lt;0.001).</p>                                                                                                                                                                                                                                                                                                                                                                                                                                                                                                                                                                                                                                                                                                                                                                                                                                                                    |
| Zarzour et al., 2021 | Lebanon | <p>A total of 628 healthcare workers completed the survey; 409 (66.2%) were younger than 40 years, and 441 (71.4%) were women. Of all participants, 503 (81.4%) were nurses, 52 (8.4%) were physicians and 63 (10.2%) were residents.</p>                                            | 628 | Cross-sectional study | Pittsburgh Sleep Quality Index | Sleep quality | <p>The mean (SD) scores on the PSQI for sleep quality for all respondents was 6.0 (3.7). 48.4% were "poor sleepers" as they got PSQI scores higher than 5.</p> <p>Participants who were aged more than 50 had lower sleep quality scores than those aged between 41 and 50 and significantly lower scores than those younger than 40 (P = 0.005 (PSQI))</p> <p>Residents had significantly higher sleep disturbances scores than practical nurses (P = 0.016). Registered nurses compared to physicians and practical nurses had significantly higher sleep quality scores ( P &lt; 0.001)</p> <p>Participants who reported having relatives or friends who got infected or quarantined had higher sleep disturbances scores than those who had not ( P = 0.019 for PSQI).</p> <p>Participants who were exposed to COVID-19 related media for more than 2 hours per day, had poorer sleep quality (P = 0.011) than those who were exposed to media less than 2 hours per day and to those who were not exposed at all.</p> <p>Greater number of stress sources was positively correlated to higher sleep disturbances ( r = 0.129, P</p> |

|  |  |  |  |  |  |  |                                                                                                                                                                                                                                                                                                                                                 |
|--|--|--|--|--|--|--|-------------------------------------------------------------------------------------------------------------------------------------------------------------------------------------------------------------------------------------------------------------------------------------------------------------------------------------------------|
|  |  |  |  |  |  |  | <p>= 0.001, respectively)</p> <p>Participants were asked whether they were still able to practice the strategies they normally use to deal with stress. Those who were still able to do it (60.4%) had lower anxiety and significantly lower sleep disturbances scores than those who were not (P = 0.096 for STAI and P = 0.011 for PSQI).</p> |
|--|--|--|--|--|--|--|-------------------------------------------------------------------------------------------------------------------------------------------------------------------------------------------------------------------------------------------------------------------------------------------------------------------------------------------------|

| Students            |                   |                                                                                                                                                                                                                                             |             |                       |                                                       |                                                    |                                                                                                                                                                                                                                                                                      |
|---------------------|-------------------|---------------------------------------------------------------------------------------------------------------------------------------------------------------------------------------------------------------------------------------------|-------------|-----------------------|-------------------------------------------------------|----------------------------------------------------|--------------------------------------------------------------------------------------------------------------------------------------------------------------------------------------------------------------------------------------------------------------------------------------|
| Reference           | Location of Study | Population                                                                                                                                                                                                                                  | Sample Size | Study Design          | Sleep Health Measurement Tool                         | Sleep Health Domains                               | Main Findings                                                                                                                                                                                                                                                                        |
| Al Mukhaini et al., | Oman              | 376 Omani students who had returned to Oman from abroad due to the COVID19 pandemic. 255 male (67.8%) and 121 female (32.2%) participants. The mean age of the participants was 21.7 years old (SD = 3.8), ranging from 18 to 45 years old. | 376         | Cross-sectional study | Athens insomnia scale                                 | Sleep problems (insomnia scale)                    | 49.5% (n = 186) noted to be suffering from insomnia Female students were 2.4 times (OR = 2.43; CI: 1.50–3.93; P< .001) more likely to be insomniac compared to male students The risk of insomnia may be less in the subjects going for a walk (OR = 0.29; CI: 0.12–0.69; P = 0.008) |
| Ali et al., 2021    | Lebanon           | 510 secondary level school students from grades 9–12 participated in this online survey. Among these, 382 (74.9%) were females, and there was no significant difference in age between male and female students.                            | 510         | Cross-sectional study | Insomnia Severity Index Bedtime Procrastination Scale | Sleep disorder (Insomnia, bedtime procrastination) | Screen time of more than seven hours per day was significantly associated with insomnia (82%), and bedtime procrastination.                                                                                                                                                          |

|                         |              |                                                                                                                                                                                                                                                                                                                    |     |                       |                                                                                    |                                                              |                                                                                                                                                                                                                                                                                                                                                                                                                                                                                                                                                                                                                                                                                                                                                                                                                                                                                               |
|-------------------------|--------------|--------------------------------------------------------------------------------------------------------------------------------------------------------------------------------------------------------------------------------------------------------------------------------------------------------------------|-----|-----------------------|------------------------------------------------------------------------------------|--------------------------------------------------------------|-----------------------------------------------------------------------------------------------------------------------------------------------------------------------------------------------------------------------------------------------------------------------------------------------------------------------------------------------------------------------------------------------------------------------------------------------------------------------------------------------------------------------------------------------------------------------------------------------------------------------------------------------------------------------------------------------------------------------------------------------------------------------------------------------------------------------------------------------------------------------------------------------|
| Alrashed et al., 2021   | Saudi Arabia | Total number of participants was 453 from 3rd to 5th medical year, and intern medical students.                                                                                                                                                                                                                    | 453 | Cross-sectional study | Insomnia Severity Index                                                            | Sleep problems (insomnia)                                    | 162 (34.9%) of the participants had insomnia symptoms, among them 57.4% of females and 42.6% of males have insomnia. Participants with an age group between 22 and 25 have more sleep issues (43.2%) as compared to other age groups. 3rd-year students have more insomnia 36.41% as compared to other years. The age group 30 and above have a high prevalence of insomnia (OR = 1.67; P = 0.26), followed by the age group 26–29 (OR = 1.40; P = 0.19) Those who have a severe level of stress have ~3 times higher prevalence of insomnia (OR = 2.81; P = 0.0008), followed by a moderate level of stress (OR = 1.50; P = 0.15) Those who were involved in religious practices have less sleep problems. Similarly, those who have mentally accepted the current COVID situation also have less sleep problems (P = 0.0001) as compared to those who did not accept the current situation. |
| Alshammari et al., 2021 | Saudi Arabia | 186 replies were received from professional pharmacy students . Female students accounted for 64.5 percent of the total, which is in line with their general ratio in the Pharm.D. Program. The second professional year had the most participants (25.8%), while the sixth professional year had the least (7.0%) | 186 | Cross-sectional study | Survey items developed by the study's author including questions on sleep quality. | Sleep quality                                                | "Discovered that practically all students were plagued by symptoms of sadness, anxiety, tension, and poor sleep quality"                                                                                                                                                                                                                                                                                                                                                                                                                                                                                                                                                                                                                                                                                                                                                                      |
| Alyoubi et al., 2021    | Saudi Arabia | A total of 582 undergraduate students. 73% were female and 25% were male. The majority (78%) of undergraduate students                                                                                                                                                                                             | 582 | Cross-sectional study | Insomnia Severity Index                                                            | Sleep duration<br>Sleep quality<br>Sleep disorder (insomnia) | Over one-third of students reported that sleep had been impacted and worsened during the pandemic. 22% having trouble falling asleep, 17.9% waking up during the night, 8.8% waking up early in the morning, 25.9% have poor sleep quality, 22.7% feeling tired during the day, 9.3% have nightmares                                                                                                                                                                                                                                                                                                                                                                                                                                                                                                                                                                                          |

|                         |        |                                                                                                                                                                                    |     |                       |                                |                           |                                                                                                                                                                                                                                                                                                                                                                                                                                                                                                                                                                                                                                                                                                                                                                                                                                                                                                                                                                                                             |
|-------------------------|--------|------------------------------------------------------------------------------------------------------------------------------------------------------------------------------------|-----|-----------------------|--------------------------------|---------------------------|-------------------------------------------------------------------------------------------------------------------------------------------------------------------------------------------------------------------------------------------------------------------------------------------------------------------------------------------------------------------------------------------------------------------------------------------------------------------------------------------------------------------------------------------------------------------------------------------------------------------------------------------------------------------------------------------------------------------------------------------------------------------------------------------------------------------------------------------------------------------------------------------------------------------------------------------------------------------------------------------------------------|
|                         |        | were enrolled at the King Abdulaziz University and 16% were studying at Jeddah University in Saudi Arabia.                                                                         |     |                       |                                |                           | and 5.2% have poor dreams<br>This study showed that over half of students reported sleep disruption and 1.4% were taking melatonin supplements for the sleep problem. A small percentage (4.3%) had very mild sleep problem, while 16% reported a mild sleep problem, 21.8% moderate, 9.3% severe, and 1.2% very severe. There was no significant difference between older and younger students on the level of insomnia. Students reported a statistically high level of insomnia with a high level of depression, anxiety, perceived stress ( $p < 0.001$ ). Undergraduate students reported statistically more insomnia symptoms with a lower level of psychological resilience ( $r = -0.150, p < 0.001$ ). The level of insomnia was slightly higher for students who self-isolated<br>Students who received support from mental health services but had it stopped and offered online and declined before COVID-19 reported a significantly higher level of insomnia $F(5, 555) = 2.768, p = 0.018$ . |
| Bosi Bağcı et al., 2021 | Turkey | 340 interns accounting for 63.4 % of the target population completed the online questionnaire. Almost 60 % of the participants were composed of females and the mean age was 24.89 | 340 | Cross-sectional study | Pittsburgh Sleep Quality Index | Sleep quality             | Sleep quality during the COVID-19 compared to the pre-COVID-19 period was assessed and it was found that only 27.8 % of the interns observed no change in sleep quality. However, 38.6 % of the interns experienced an improvement and 33.6 % had a reduction in sleep quality. Then, the sleep quality of interns was evaluated with PSQI and 53.4 % of the students were found to have poor sleep quality during the COVID-19 period. The effect of gender on sleep quality was also evaluated and even though female students had a predilection towards poor sleep quality, there was no significant difference between genders ( $P = 0.075$ )                                                                                                                                                                                                                                                                                                                                                         |
| Cakmak et al., 2022     | Turkey | 564 students<br>The mean age of the participants was $28.13 \pm 0.49$ years (min: 18 / max: 90). While 71.1% of the participants were                                              | 564 | Cross-sectional study | Bergen Insomnia Scale          | Sleep disorder (insomnia) | The results revealed that 64.7% of the participants had insomnia. The findings suggest that there was no statistically significant difference between insomnia and age, educational attainment, smoking status, and who the participants lived during the quarantine ( $p > 0.05$ ).                                                                                                                                                                                                                                                                                                                                                                                                                                                                                                                                                                                                                                                                                                                        |

|                      |        |                                                                                                                                                                                                                                                                                                                                                             |        |                            |                                                                                                      |                                                               |                                                                                                                                                                                                                                                                                                                                                                                                                                                                              |
|----------------------|--------|-------------------------------------------------------------------------------------------------------------------------------------------------------------------------------------------------------------------------------------------------------------------------------------------------------------------------------------------------------------|--------|----------------------------|------------------------------------------------------------------------------------------------------|---------------------------------------------------------------|------------------------------------------------------------------------------------------------------------------------------------------------------------------------------------------------------------------------------------------------------------------------------------------------------------------------------------------------------------------------------------------------------------------------------------------------------------------------------|
|                      |        | female, 66.5% were single. It was found that 66.3% of the individuals were university students, and 82.8% did not have any chronic diseases.                                                                                                                                                                                                                |        |                            |                                                                                                      |                                                               | Those who used a phone or tablet before sleeping ( $p = 0.020$ ) were found to have significantly higher levels of insomnia than others. The mean days of uninterrupted home quarantine was higher for participants experiencing insomnia.                                                                                                                                                                                                                                   |
| Dalcali et al., 2021 | Turkey | mean age of students was $20.39 \pm 2.05$ years and 82% ( $n = 232$ ) were female, and 33.6% ( $n = 95$ ) were first-year students                                                                                                                                                                                                                          | 283    | Descriptive, correlational | Verran and Snyder-Halpern sleep scale (VAS)                                                          | sleep disturbance, effective sleep, daytime sleep             | Before COVID-19, 21.20% reported that their night sleep was interrupted, while during the COVID-19 period, this rate increased to 28.26% and this increase was considered to be statistically significant. There was a high-level positive significant correlation between students' sleep quality and state anxiety ( $r: 0.305$ , $p: 0.000^{**}$ ) and trait anxiety ( $r: 0.288$ ; $p: 0.000$ )                                                                          |
| Elakany et al., 2022 | Global | 3793 (22.3%) of students. 61.7% females and the mean age was 31.0 years ( $SD = 8.9$ )                                                                                                                                                                                                                                                                      | 17,008 | Cross-sectional study      | Online survey                                                                                        | changes in sleep pattern (sleeping more, less, or no changes) | 4,889 people (28.7%) reported change in sleep patterns. Compared to non-students, students had significantly higher odds of reporting changes in sleep ( $AOR = 1.52$ ; 95% CI: 1.39, 1.67). Participants from LICs and LMICs had lower odds of reporting changes in sleep ( $AOR = 0.74$ ; 95% CI: 0.58, 0.94 and $AOR = 0.67$ ; 95% CI: 0.61, 0.72). participants from UMICs, had significantly higher odds of reporting changes in sleep ( $AOR = 1.26$ ; 95% 1.15, 1.39) |
| Elsalem et al., 2020 | Jordan | 1019 students from Jordan University of Science and Technology agreed to participate in the study and completed the survey. Approximately, half of the participants were from Faculty of Medicine (51.32%), while the other half in descending order were students from Faculties of Nursing, Dentistry, Pharmacy and Applied Medical Sciences. Almost two- | 1019   | Cross-sectional study      | Survey items developed by the study's author include questions on sleep duration and sleep disorder. | Sleep duration. Sleep disorder (insomnia)                     | Student's experience of stress during exams was also found to be significantly associated with changes in sleeping hours. Among students who reported more stress with remote E-exams, 44.15% had reduction in their sleeping hours and 28.65% reported more consumption of medications to relief insomnia. Caffeine was mainly consumed to keep students more alert for exam preparation and was linked to loss of sleep during exams days                                  |

|                     |              |                                                                                                                                                                                                                                                             |      |                       |                                  |                                             |                                                                                                                                                                                                                                                                                                                                                                                                                                                                                                                                                                                                                                                                                                                                                                                     |
|---------------------|--------------|-------------------------------------------------------------------------------------------------------------------------------------------------------------------------------------------------------------------------------------------------------------|------|-----------------------|----------------------------------|---------------------------------------------|-------------------------------------------------------------------------------------------------------------------------------------------------------------------------------------------------------------------------------------------------------------------------------------------------------------------------------------------------------------------------------------------------------------------------------------------------------------------------------------------------------------------------------------------------------------------------------------------------------------------------------------------------------------------------------------------------------------------------------------------------------------------------------------|
|                     |              | thirds of the respondents (65.55%) were females.                                                                                                                                                                                                            |      |                       |                                  |                                             |                                                                                                                                                                                                                                                                                                                                                                                                                                                                                                                                                                                                                                                                                                                                                                                     |
| Göl et al., 2021    | Turkey       | 2630 nursing students. The mean age of students participating in the study was 21.30 ± 1.95 SD. The majority of them (82.1%) were female students and 11.4% had a chronic disease.                                                                          | 2630 | Cross-sectional study | GHQ-12                           | Sleep disorder (sleep pattern)              | Change in sleep pattern 62.9% (= 0.629)                                                                                                                                                                                                                                                                                                                                                                                                                                                                                                                                                                                                                                                                                                                                             |
| Goweda et al., 2020 | Saudi Arabia | 438 medical students were recruited from the second year to the sixth year among Umm Al-Qura University Faculty of Medicine. Half (50.5%) were female, nearly all (422, 96.3%) had a single marital status, and a minority (55, 12.6%) had chronic disease. | 438  | Cross-sectional study | Sleep-50 questionnaire           | Sleep disorders (narcolepsy, insomnia, CRD) | 323 (73.7%) of the participants complained of at least one sleep disorder. The most prevalent sleep disorder was Narcolepsy (NL) with 226 (51.6%), followed by 138 (31.5%) with insomnia, and 98 (22.4%) indicating Circadian Rhythm sleep Disorder (CRD)<br>87 (19.9%) of respondents positive for at least two combined sleep disorders, and 63 (14.4%) demonstrating three combined sleep disorders.<br><br>In the time students spent watching television and/or on smartphones, there was significant difference in students with sleep disorders (m=6.71 hours, SD=3.83) and those without (m=5.90 hours, SD=3.40) (p=0.004)<br><br>Significant relationship between gender and sleep disorder, with females more affected at 178 (80.5%) than males at 145 (66.8%) (p=0.001) |
| Grande et al., 2021 | Saudi Arabia | 152 nursing intern students were involved in this study. Among them, 73% are in the age of 20 years and below, while 23.7% are between 31 and 40 years of age, and 3.3% fall within the age range of 21–30 years old. In terms of gender,                   | 152  | Cross-sectional study | Quality of Life Evaluation Scale | Sleep quality                               | Sleep satisfaction score 1.99/5.00                                                                                                                                                                                                                                                                                                                                                                                                                                                                                                                                                                                                                                                                                                                                                  |

|                         |               |                                                                                                                                                                                                                                                                                                                                                   |      |                       |                                                                                      |                                       |                                                                                                                                                                                                                                                                                                                                                                                                                                                               |
|-------------------------|---------------|---------------------------------------------------------------------------------------------------------------------------------------------------------------------------------------------------------------------------------------------------------------------------------------------------------------------------------------------------|------|-----------------------|--------------------------------------------------------------------------------------|---------------------------------------|---------------------------------------------------------------------------------------------------------------------------------------------------------------------------------------------------------------------------------------------------------------------------------------------------------------------------------------------------------------------------------------------------------------------------------------------------------------|
|                         |               | 53.9% are males, and 46.1% are females.                                                                                                                                                                                                                                                                                                           |      |                       |                                                                                      |                                       |                                                                                                                                                                                                                                                                                                                                                                                                                                                               |
| Jalal et al., 2021      | Saudi Arabia  | 628 students studying bachelor's degree programs, between 18 and 30 years of age. 70.9% were female                                                                                                                                                                                                                                               | 628  | Cross-sectional study | Pittsburgh Sleep Quality Index                                                       | Sleep quality                         | Approximately, 188 (29.9%) students felt that sleep quality was good before lockdown, and 126 (20.1%) students felt the same during the lockdown. Moreover, the total sleeping time increased from 6.6 ± 2.3 hours per day to 8.3 ± 2.7 hours per day, which was also proved statistically significant (p = 0.001).                                                                                                                                           |
| Joseph et al., 2022     | Israel        | 533 undergraduate students of education submitted an online questionnaire before the lockdown and at its end.                                                                                                                                                                                                                                     | 533  | Prospective cohort    | Mini Sleep Questionnaire                                                             | Sleep quality                         | Levels of sleep quality (mean 5.34 [SD 0.92] vs mean 5.12 [SD 0.46], P=.02) and well-being (mean 3.79 [SD 0.62] vs mean 3.67 [SD 0.59], P=.02) were higher during the COVID-19 lockdown. These findings indicate that undergraduate students seem to have taken advantage of the change in lifestyle due to the lockdown, directing the free time toward improving health by engaging in more physical activity, thus improving sleep quality and well-being. |
| Kheirallah et al., 2021 | Jordan        | 1,404 students participated in the current study. About two-thirds (59.9%) of participants were females, 64.9% were enrolled at the two well-established medical schools at the University of Jordan (39.1%) and Jordan University of Science and Technology (JUST) (25.8%), and 59.6% were in the pre-clinical stage of their medical education. | 1404 | Cross-sectional study | Survey items developed by the study's author including questions on sleep disorders. | Sleep disorder (insomnia, nightmares) | About 13% of students self-reported experiencing increased insomnia, shallow sleep, nightmares, or insufficient sleep. In general, females self-reported experiencing significantly more sleeping problems than males. Likewise, students in the pre-clinical years experienced sleep problems (insomnia, shallow sleep, and insufficient sleep) significantly more frequently than those in their clinical years.                                            |
| Meo et al., 2022        | Saudia Arabia | The total number of medical and science students included was 782, out of whom 410 (52.4%) were medical                                                                                                                                                                                                                                           | 782  | Cross-sectional Study | Pittsburgh Sleep Quality Index,                                                      | Sleep quality<br>Sleep duration       | Out of 782 participants, 669 (85.55%) had poor sleep quality (≥5 Global PSQI score), while only 113 students had good sleep quality (<5 Global PSQI score). Out of 410 medical students, 336 (81.95%) had poor sleep quality, and 74                                                                                                                                                                                                                          |



|                               |              |                                                                                                                                                                                                                                                                                                                                                |      |                       |                                                                                     |                                        |                                                                                                                                                                                                                                                                                                                                                                                                                                                                                                                                                                                                                                                                                                   |
|-------------------------------|--------------|------------------------------------------------------------------------------------------------------------------------------------------------------------------------------------------------------------------------------------------------------------------------------------------------------------------------------------------------|------|-----------------------|-------------------------------------------------------------------------------------|----------------------------------------|---------------------------------------------------------------------------------------------------------------------------------------------------------------------------------------------------------------------------------------------------------------------------------------------------------------------------------------------------------------------------------------------------------------------------------------------------------------------------------------------------------------------------------------------------------------------------------------------------------------------------------------------------------------------------------------------------|
|                               |              | students, and 372 (47.6%) were science students, including Physics, Chemistry, Mathematics, Statistics, Botany, and Zoology. Among medical students, 143 (34.9%) were in pre-clinical years (1st and 2nd), while 266 (64.9%) of them were in clinical years 3rd, 4th, and 5th-year medical students. Female students were 65.3% of the sample. |      |                       |                                                                                     |                                        | (18.05%) had good sleep quality. While out of 372 science students, 333 (89.5%) had poor sleep quality, and 39 (10.5%) had good sleep quality. Overall, it was seen that the sleep quality of science students was poorer (Mean Global PSQI score= 8.78) than their medical counterparts (mean Global PSQI score= 7.93)<br><br>Sleep quality, sleep duration, and daytime dysfunction were poorer among pre-clinical students than clinical students<br><br>Out of the selected cases with poor sleep quality ( $\geq 5$ PSQI score), 32.1% were males, and 67.9% were females.<br><br>It was found that sleep disturbance and daytime dysfunction were poorer in students with higher BMI ranges |
| Nakhostin-Ansari et al., 2020 | Iran         | 323 medical students have completed the questionnaire (response rate = 64.6%); 37.2% of them were clerks and 62.8% interns. The mean age of participants was 23.73 (SD = 1.62), and 47.7% of them were male and 52.3% female.                                                                                                                  | 323  | Cross-sectional study | Survey items developed by the study's author including questions on sleep patterns. | Sleep disorder (sleep pattern changes) | Changes in sleep pattern (74.3%)                                                                                                                                                                                                                                                                                                                                                                                                                                                                                                                                                                                                                                                                  |
| Saadeh et al., 2021           | Jordan       | 6,157 undergraduate students (mean age $19.79 \pm 1.67$ years, males 28.7%) from the University of Jordan                                                                                                                                                                                                                                      | 6157 | Cross-sectional study | Pittsburgh Sleep Quality Index,                                                     | Sleep quality                          | The sleep quality of three-quarters of the participants was negatively affected by the extended quarantine. Nearly half of the participants reported poor sleep quality. The prevalence of poor sleep quality among participants was 76% (males: 71.5% and females: 77.8%).                                                                                                                                                                                                                                                                                                                                                                                                                       |
| Sarsak et al., 2022           | Saudi Arabia | A total of 244 students completed the survey (60.7% were female). The mean age was $22.10 \pm 2.69$                                                                                                                                                                                                                                            | 244  | Cross-sectional study | Survey items developed by the study's author include questions on                   | Sleep quality                          | 34.5% (n=84) reported sleeping late and waking up more frequently.                                                                                                                                                                                                                                                                                                                                                                                                                                                                                                                                                                                                                                |

|                    |        |                                                                                                                                   |     |                       |                                                                                                     |               |                                                                                                                                                        |
|--------------------|--------|-----------------------------------------------------------------------------------------------------------------------------------|-----|-----------------------|-----------------------------------------------------------------------------------------------------|---------------|--------------------------------------------------------------------------------------------------------------------------------------------------------|
|                    |        |                                                                                                                                   |     |                       | sleep disturbances.                                                                                 |               |                                                                                                                                                        |
| Torun et al., 2020 | Turkey | 275 students. About 60.7% of the participants (n = 167) were female, 39.3% (n = 108) were male and the mean age was 22.10 ± 2.69. | 275 | Cross-sectional study | Survey items developed by the study's author include questions on sleep duration and sleep quality. | Sleep quality | After the COVID-19 pandemic, the sleep patterns of the participants changed as 29.5% (n = 81) asleep late, wake up frequently and can not fall asleep. |

| Children              |                   |                                                                                                                                                                                                                                                                      |             |                       |                                                                                                          |                                 |                                                                                                                                                                                                                                                                                                                                       |
|-----------------------|-------------------|----------------------------------------------------------------------------------------------------------------------------------------------------------------------------------------------------------------------------------------------------------------------|-------------|-----------------------|----------------------------------------------------------------------------------------------------------|---------------------------------|---------------------------------------------------------------------------------------------------------------------------------------------------------------------------------------------------------------------------------------------------------------------------------------------------------------------------------------|
| Reference             | Location of Study | Population                                                                                                                                                                                                                                                           | Sample Size | Study Design          | Sleep Health Measurement Tool                                                                            | Sleep Health Domains            | Main Findings                                                                                                                                                                                                                                                                                                                         |
| Alanazi et al., 2022  | Saudi Arabia      | A total of 1021 parents completed the survey, of which 78.8% were Saudis. Fifty-five per cent of respondents were mothers with an average age of 41 (±9.2) years. The mean age of the children was 8.5 (±1.85) years. Sixty per cent of the study sample were girls. | 1021        | Cross-sectional study | Survey items developed by the study's author including questions on sleeping duration and sleep quality. | Sleep duration<br>Sleep quality | Slightly more than half the children met the sleep recommendations (95% CI 52.9, 60.9)<br>Sleep quality was reasonably high (average of 5.4 [2.26] points out of 7.0)<br>Weak negative correlation between parent education level and the quality of their child's sleep (r = -0.11, p < 0.0001)                                      |
| Almhizai et al., 2021 | Saudi Arabia      | Questionnaire was completed by 1141 respondents. Of these, 454 were < 18 years old (360 were aged 16 - 18 years old, and 94 were < 15 years old). Thus, these respondents                                                                                            | 1141        | Cross-sectional study | Survey items developed by the study's author including questions on sleep quality and sleep duration.    | Sleep quality<br>Sleep duration | Higher age was associated with higher increase in the frequency of waking up (r = 0.076, P < 0.05), sleeping little (r = 0.058, P < 0.05)<br>Having relatives who were infected with COVID-19 was associated with sleeping little (r = 0.074, P < 0.01)<br>Children whose parents were divorced had higher scores on sleep disorders. |

|                          |              |                                                                                                                                                                                                                                                                                                                                                  |      |                       |                                                                                                                               |                                 |                                                                                                                                                                                       |
|--------------------------|--------------|--------------------------------------------------------------------------------------------------------------------------------------------------------------------------------------------------------------------------------------------------------------------------------------------------------------------------------------------------|------|-----------------------|-------------------------------------------------------------------------------------------------------------------------------|---------------------------------|---------------------------------------------------------------------------------------------------------------------------------------------------------------------------------------|
|                          |              | completed the questionnaire on behalf of themselves. The remaining 688 respondents were adults and completed the questionnaire on behalf of their children. Male and female children represented 42.5% and 57.5% of the study sample.                                                                                                            |      |                       |                                                                                                                               |                                 |                                                                                                                                                                                       |
| Almugti et al., 2021     | Saudi Arabia | 651 participants in total; slightly over half (58%) were female. The respondents answered questions related to their children. These items showed that the mean age of their children was 9±4 years, the majority of the children were living in apartments (63.9%), and that 89% of the children were living with both their father and mother. | 651  | Cross-sectional study | Survey items developed from a similar study on Arab Israeli children including questions on sleep quality and sleep duration. | Sleep duration<br>Sleep quality | During the COVID-19 outbreak, one-third of children had asked to sleep in their parents' beds. Study reports reduced sleep time among children compared with the pre-pandemic period. |
| Al-Rahamneh et al., 2021 | Jordan       | Data collected from 1309 parents (mothers = 1219 (93.1%); fathers = 90 (6.9%) children (n = 1309 male = 716 (54.7%) and female = 593 (45.3%)), they were between 5–11 years of age (8.1 ± 2.02 years) and most of them were studying at private schools (92.7%).                                                                                 | 1309 | Cross-sectional study | Children's emotional and behavioral symptoms questionnaire                                                                    | Sleep duration                  | 42.5% of children had 8 h or less of sleep per night, which is considered as a short sleeping duration.                                                                               |
| Bucak et                 | Adiyaman,    | Group 1 (school age                                                                                                                                                                                                                                                                                                                              | 372  | Comparati             | Children's Sleep                                                                                                              | Child's sleep                   | Total CSHQ scores were 41.57 ± 7.57 (20–60) in                                                                                                                                        |

|                       |        |                                                                                                                                                                                                                                                                                                     |     |                       |                                             |                                                                                                                                                                                                                 |                                                                                                                                                                                                                                                                                                                                                     |
|-----------------------|--------|-----------------------------------------------------------------------------------------------------------------------------------------------------------------------------------------------------------------------------------------------------------------------------------------------------|-----|-----------------------|---------------------------------------------|-----------------------------------------------------------------------------------------------------------------------------------------------------------------------------------------------------------------|-----------------------------------------------------------------------------------------------------------------------------------------------------------------------------------------------------------------------------------------------------------------------------------------------------------------------------------------------------|
| al.,2021              | Turkey | children of health worker parents): 122 participants, 66 (54.1%) females and 56 (45.9%) males<br>Group 2 (school age children of non-health worker parents): 250 participants, 129 (51.6%) females and 121 (48.4%) males                                                                            |     | ve study              | Habits Questionnaire (CSQH)                 | habits and sleep-related problems. 8 subscales included*: bedtime resistance, sleep onset delay, sleep duration, sleep anxiety, night wakings, parasomnias, sleep disordered breathing, and daytime somnolence. | Group 1 and 39.6 ± 8.47 (17–68) in Group 2 (p:0.03)                                                                                                                                                                                                                                                                                                 |
| Cahal et al., 2021    | Israel | Mean (±SD) age of patients was 6.2 years (4.7) with a range of 0–18 years. 276 (62%) males and 169 (38%) females<br>368 (82%) had a single respiratory disorder, the most common of which were asthma (n=291, 65%), recurrent pneumonia (n=96, 21.5%), bronchopulmonary dysplasia (BPD; n=32, 7.2%) | 445 | Cross-sectional study | Anonymous electronic questionnaire          | Secondary outcomes related to patients' lifestyles                                                                                                                                                              | During the lockdown, Sleep duration increased in 59 patients (13.4%), decreased in 227 patients (51.1%) and remained unchanged in 155 patients (35.1%). Older patients experienced increased screen time, decreased physical activity, and shorter sleep duration (p = .008, <.001, and <.001, respectively) compared to their younger counterparts |
| El Refay et al., 2021 | Egypt  | 765 responses were received from children and adolescents aged 4–16 years. 408 children (53.3%) were males and 357 participants (46.7%) were females. More than half of the participants                                                                                                            | 765 | Cross-sectional study | Sleep Disturbance Scale for Children score. | Sleep quality<br>Sleep disorder                                                                                                                                                                                 | The overall mean Sleep Disturbance Scale for Children score (SDSC) in participated groups was 44.6 ± 11.72 suggesting a widespread stressful impact of the lockdown<br>Only 25 (3.2%) of participants had an (SDSC) over 70 which indicate acute severe sleep disorder<br>502 (65.6%) showed the symptoms suggestive of sleep disorder.             |

|                       |        |                                                                                                                                                                                                                                                                                                                    |     |                       |                                                                                                       |                                                                      |                                                                                                                                                                                                                                                                                                                                                                                                                                                                                                                                                                                                                                                                          |
|-----------------------|--------|--------------------------------------------------------------------------------------------------------------------------------------------------------------------------------------------------------------------------------------------------------------------------------------------------------------------|-----|-----------------------|-------------------------------------------------------------------------------------------------------|----------------------------------------------------------------------|--------------------------------------------------------------------------------------------------------------------------------------------------------------------------------------------------------------------------------------------------------------------------------------------------------------------------------------------------------------------------------------------------------------------------------------------------------------------------------------------------------------------------------------------------------------------------------------------------------------------------------------------------------------------------|
|                       |        | 407 (53.2%) were enrolled in primary schools.                                                                                                                                                                                                                                                                      |     |                       |                                                                                                       |                                                                      | Disorders of initiating and maintaining sleep were the most common among participants as 168 (33.4%) of them were suffering from it while 79 (15.7%) children were suffering from excessive somnolence.<br>Significant positive correlations were found between SDSC and extra screen usage, understanding safety and quarantine measures, anxiety signs, and change in child lifestyle with (p = 0.029, 0.010, 0.001 and 0.001) sequentially<br>Significant positive correlation was found between family income affection and sleep disorder score (p =0.04)                                                                                                           |
| Ghanamah et al., 2021 | Israel | 382 parents answered a survey about their children.<br>51% of the children were males, the most representative grade was the first grade (21.2%), 11.8% of the children were detected in COVID-19 and 43.5% of the children were asked to be in isolation since they had been exposed to COVID-19 diagnosed person | 382 | Cross-sectional study | Survey items developed by the study's author including questions on sleep duration and sleep quality. | Sleep duration<br>Sleep quality                                      | 55.8% of the children, who before the pandemic outbreak used to sleep alone in their own bedroom, asked the parents to sleep in their parents' bed during the outbreak period.<br><br>41.4% showed sleep difficulties. (more in kindergarteners than in pre-kindergarteners)<br><br>More hours spent in sleep through the outbreak compared to before the outbreak<br><br>If the child was in isolation, those children asked their parents to sleep beside them more than the children who were not asked to be in isolation. In the families with diagnosed Coronavirus, the children asked to sleep beside the parents more than in families with no diagnosed member |
| Kaditis et al., 2021  | Global | 45.8% female; ages 3–17 years                                                                                                                                                                                                                                                                                      | 845 | Longitudinal study    | Online survey                                                                                         | Change in bedtime, change in wake time, and change in sleep duration | As a result of the observed shift in bedtime and wake time, the median sleep duration score on weekdays increased significantly during the pandemic compared to before (p < .001), while there was no significant change during the weekend (p = .51). More children had an increase in sleep duration on weekdays than a decrease, whereas similar proportions of children had an increase or a decrease on weekends. Increase in sleep duration during the pandemic was most apparent in the 14–17 years age group during weekdays, while a                                                                                                                            |

|                          |         |                                                                                                                                                                                                                                 |       |                       |                                                                                                     |                                                          |                                                                                                                                                                                                                                                                                                                                                                                                                                                                                                                                                                                                                                                                                                                                                           |
|--------------------------|---------|---------------------------------------------------------------------------------------------------------------------------------------------------------------------------------------------------------------------------------|-------|-----------------------|-----------------------------------------------------------------------------------------------------|----------------------------------------------------------|-----------------------------------------------------------------------------------------------------------------------------------------------------------------------------------------------------------------------------------------------------------------------------------------------------------------------------------------------------------------------------------------------------------------------------------------------------------------------------------------------------------------------------------------------------------------------------------------------------------------------------------------------------------------------------------------------------------------------------------------------------------|
|                          |         |                                                                                                                                                                                                                                 |       |                       |                                                                                                     |                                                          | decrease in sleep duration was most prominent in 3- to 5-year-old children during both weekdays and weekends. Sleep duration did not change in 43% of participants on weekdays and 46.2% on weekends. Children aged 14–17 years were the least likely to have unchanged sleep duration on weekdays (28.4%).                                                                                                                                                                                                                                                                                                                                                                                                                                               |
| Kamaleddine et al., 2022 | Lebanon | 383 children whose parents agreed to use the responses for this study were finally included. The proportion of boys and girls was even.                                                                                         | 383   | Cross-sectional study | Children Sleep Habit Questionnaire                                                                  | Sleep quality                                            | Observed that children with screen time $\geq 2$ h had sleep problems.                                                                                                                                                                                                                                                                                                                                                                                                                                                                                                                                                                                                                                                                                    |
| Mekkawy et al., 2022     | Egypt   | Participants in this study (n=672) were divided according to age into 4 main categories, 6–9 years (21.7%), 9–12 years (24.4%), 12–15 years (30.1%) and 15–18 years (23.8%). Males represented 48.2% and females 51.8%          | 672   | Cross-sectional study | BEARS sleep screening tool                                                                          | Sleep duration<br>Sleep quality<br>Sleep disorders       | 50% reported increase in their sleeping habit, 31.8% reported no change while 45.2% stated no sleeping problems, 19% had a difficulty to fall asleep, 16.1% had a problem waking up during sleep, 11.9% had a problem waking up feeling tired, & 7.7% had a problem sleeping too much . When comparing the sleep habits pre COVID-19 with the lockdown, results had shown significant decrease in the % of sleeping less than 7 hours from 41.4% to 5.4%, while there was significant increase in the % of sleeping more than 10 hours from 4.8% to 49.7% (p<0.001). On the other hand, the energy level status of being energized significantly decreased from 55.4% to 7.7%, and significantly increased in the lazy state from 3.6% to 54.8% (p<0.001) |
| Ranjbar et al., 2021     | Iran    | 20697 filled questionnaires were received from the participants with an average age of 13.76 $\pm$ 2.50 which included 6139 (29.7%) male and 14558 (70.3%) females. Among the participants, 16672 (80.6%) were from urban areas | 20697 | Cross-sectional study | Survey items developed by the study's author include questions on sleep duration and sleep pattern. | Sleep duration<br>Sleep disorder (sleep pattern changes) | 2782 (13.4%) students had 5 or fewer hours of sleep, 2689 (13%) had 6 to 8 h, 2655 (12.8%) had 9 to 10 h, 1506 (7.3%) had 11 to 12 h, and 11065 (53.5%) had above 12 h of sleep throughout the day. The majority (8934: 43.2%) of students went to bed between 23 and 24 P.M. while the majority (11585: 56%) woke up at 8 A.M.                                                                                                                                                                                                                                                                                                                                                                                                                           |

|                          |        |                                                                                                                                                                                                                                                                                                                      |      |                       |                                                                                                       |                                                              |                                                                                                                                                                                                                                                                                                                                                                                                                                                                                                                                                                                                                                                                                      |
|--------------------------|--------|----------------------------------------------------------------------------------------------------------------------------------------------------------------------------------------------------------------------------------------------------------------------------------------------------------------------|------|-----------------------|-------------------------------------------------------------------------------------------------------|--------------------------------------------------------------|--------------------------------------------------------------------------------------------------------------------------------------------------------------------------------------------------------------------------------------------------------------------------------------------------------------------------------------------------------------------------------------------------------------------------------------------------------------------------------------------------------------------------------------------------------------------------------------------------------------------------------------------------------------------------------------|
|                          |        | and 4025 (19.4%) from rural areas.                                                                                                                                                                                                                                                                                   |      |                       |                                                                                                       |                                                              |                                                                                                                                                                                                                                                                                                                                                                                                                                                                                                                                                                                                                                                                                      |
| Ustuner Top et al., 2022 | Turkey | Of the 1040 children, 528 (50.8%) males and 512 (49.2%) females were included in the analyses. The mean age of the children was $9.16 \pm 2.05$ , and 80.3% were aged between 9 and 12 years.                                                                                                                        | 1040 | Cross-sectional study | The Children's Sleep Habits Questionnaire                                                             | Sleep quality<br>Sleep duration<br>Sleep disorder            | The prevalence of sleep disturbances among 6–12-year-old children during the COVID-19 pandemic in Turkey was 55.5%.<br>Sleep disturbances were found to be significantly associated with 6–8 years of age, and poor family relationships ( $p < 0.05$ ).<br><br>The most common sleep disturbances were bedtime resistance (51.9%), sleep onset delay (61.4%), and sleep duration (90.2%). The children's ages, family relationships, and eating habits were linked to their sleep disturbances. Moreover, their results indicated that sleep disturbances were more common in the children of parents who felt helpless, apprehensive, and frightened during the COVID-19 pandemic. |
| Zengin et al., 2021      | Turkey | 309 children. The average age of the children in the study was $10.3 \pm 1.2$ ; 52.1% of participants were male.                                                                                                                                                                                                     | 309  | Cross-sectional study | Survey items developed by the study's author including questions on sleep duration and sleep quality. | Sleep duration<br>Sleep quality                              | Children stated that due to the pandemic they experienced changes in terms of sleep (61.5%; $n = 190$ )<br><br>Some of the children in the present study stated that their sleeping habits have become irregular, and the majority of them had reduced their time for social activity. These findings are similar to our results.                                                                                                                                                                                                                                                                                                                                                    |
| Zreik et al., 2021       | Israel | Mothers of 264 children (120 boys), with a mean (SD, range) age of 31.27 (17.39, 6–72) months, participated in the study: 100 of the mothers were Arab and 141 were Jewish. Approximately 38% of the infants were firstborns, and families had a mean (SD) of 2.15 (0.95) children. The mean (SD) age of the mothers | 264  | Cross-sectional study | Insomnia Severity Index<br><br>Brief Infant/Child Sleep Questionnaire                                 | Sleep disorder (insomnia)<br>Sleep quality<br>Sleep duration | The majority of mothers reported no change in their child's sleep quality, duration, and sleeping arrangement. However, about 30% reported a negative change in child's sleep quality and a decrease in sleep duration, and there were also mothers who reported a positive change.<br><br>60% of the mothers reported a negative change in their sleep quality. In all, 23% of mothers scored above the clinical cut-off for insomnia (ISI score of $>15$ ) during the COVID-19 crisis, compared to only 11% who reported (retrospectively) having clinical insomnia before the COVID-19 crisis ( $\chi^2 (1) = 5.36$ ,                                                             |

1  
2  
3  
4  
5  
6  
7  
8  
9  
10  
11  
12  
13  
14  
15  
16  
17  
18  
19  
20  
21  
22  
23  
24  
25  
26  
27  
28  
29  
30  
31  
32  
33  
34  
35  
36  
37  
38  
39  
40  
41  
42  
43  
44  
45  
46  
47

|  |  |                                |  |  |  |                                                                                                                                                                                                                                                                                                                                                                                                                                                                                                                                                                                                                                                                                                                                                                                                                                                                                                                                                                                                                                                                                                                                                                                                                                                                                                                                                                                                                                                                                                                                                                                                                |
|--|--|--------------------------------|--|--|--|----------------------------------------------------------------------------------------------------------------------------------------------------------------------------------------------------------------------------------------------------------------------------------------------------------------------------------------------------------------------------------------------------------------------------------------------------------------------------------------------------------------------------------------------------------------------------------------------------------------------------------------------------------------------------------------------------------------------------------------------------------------------------------------------------------------------------------------------------------------------------------------------------------------------------------------------------------------------------------------------------------------------------------------------------------------------------------------------------------------------------------------------------------------------------------------------------------------------------------------------------------------------------------------------------------------------------------------------------------------------------------------------------------------------------------------------------------------------------------------------------------------------------------------------------------------------------------------------------------------|
|  |  | <p>was 33.97 (4.20) years.</p> |  |  |  | <p>p = .02).</p> <p>The current maternal ISI score was positively correlated with child's sleep latency, number of night awakenings, and wake after sleep onset, and was negatively correlated with sleep duration. Maternal acute COVID-19 anxiety was positively correlated with the child's number of night awakenings, and negatively correlated with the child's sleep duration. When examining the correlations between the current maternal ISI score and child's sleep variables with maternal acute COVID-19 anxiety as a covariate, the correlations with child's sleep variables, number of night awakenings and WASO, remained significant (r = .26, p = .001 and r = .31, p &lt; .001, respectively), while the correlations with child's sleep latency and sleep duration were no longer significant.</p> <p>The correlation between maternal acute COVID-19 anxiety and the current maternal ISI score was significant (r = .38, p &lt; .001) and remained significant after controlling for the child's sleep duration, number of night awakenings, and WASO (r = .40, p &lt; .001)</p> <p>The change in child's sleep quality was associated with the change in ISI score of the mother (r s = -.33, p &lt; .001), so that mothers who reported that their child's sleep improved during the COVID-19 crisis, were more likely to report a decrease in their own insomnia symptoms during the crisis.</p> <p>Mothers who reported that their child's sleep had negatively changed had higher levels of anxiety traits, compared to mothers who reported no change in their child's sleep.</p> |
|--|--|--------------------------------|--|--|--|----------------------------------------------------------------------------------------------------------------------------------------------------------------------------------------------------------------------------------------------------------------------------------------------------------------------------------------------------------------------------------------------------------------------------------------------------------------------------------------------------------------------------------------------------------------------------------------------------------------------------------------------------------------------------------------------------------------------------------------------------------------------------------------------------------------------------------------------------------------------------------------------------------------------------------------------------------------------------------------------------------------------------------------------------------------------------------------------------------------------------------------------------------------------------------------------------------------------------------------------------------------------------------------------------------------------------------------------------------------------------------------------------------------------------------------------------------------------------------------------------------------------------------------------------------------------------------------------------------------|

**Patients With Chronic Illnesses**



| Reference              | Location of Study | Population                                                                                                                                                                                                                                                                                                           | Sample Size | Study Design          | Sleep Health Measurement Tool                                                                         | Sleep Health Domains                                    | Main Findings                                                                                                                                                                                                                                                                                                                            |
|------------------------|-------------------|----------------------------------------------------------------------------------------------------------------------------------------------------------------------------------------------------------------------------------------------------------------------------------------------------------------------|-------------|-----------------------|-------------------------------------------------------------------------------------------------------|---------------------------------------------------------|------------------------------------------------------------------------------------------------------------------------------------------------------------------------------------------------------------------------------------------------------------------------------------------------------------------------------------------|
| Alkhotani et al., 2020 | Saudi Arabia      | A total of 156 patients with epilepsy completed the questionnaire. Sixty-two percent of our responders were female patients, 99% were living with family, 38% had generalized seizures, 47% were on single medications, and 48.1% had been seizure-free for the past three months prior to the start of the pandemic | 156         | Cross-sectional study | Survey items developed by the study's author including questions on sleep duration and sleep quality. | Sleep duration<br>Sleep quality                         | (71.2%) experienced a significant change in their sleep. Most frequent change in sleep was a reversal of the sleep pattern in 58% of the respondents (sleep after sunrise), followed by more sleep than usual in 9.6%, less sleep in 2.6%, and intermittent sleep in 0.6%.                                                               |
| Athamneh et al., 2021  | Jordan            | 506 (90.03%) neurology patients responded to the questionnaire. Patients under 40 years of age constituted over half the sample. Men constituted 45.45% of the sample.                                                                                                                                               | 506         | Cross-sectional study | Survey items developed by the study's author including questions on sleep duration.                   | Sleep quality<br>Sleep disorder (Sleep pattern changes) | Sleep disturbances were reported by nearly one in three patients who had epilepsy or headache, and the majority ascribed these disturbances to the impact of the pandemic. Changes in sleep patterns were reported by 37.50% of patients with tension/migraine headaches, and 50.00% blamed these changes to the impact of the pandemic. |
| Çolak et al., 2021     | Turkey            | Pregnant women mean age 30.17 ± 5.47 years                                                                                                                                                                                                                                                                           | 149         | Cross-sectional study | Pittsburgh Sleep Quality Index (PSQI)                                                                 | Sleep quality                                           | The depression, anxiety, and defective sleep quality levels of the participants who were previously in the home quarantine were statistically significantly higher (p < 0.001, p < 0.001, p < 0.001, respectively).                                                                                                                      |
| Güç et al., 2022       | Turkey            | Of the 761 cancer patients, 480 (63.1%) are female and 281 (36.9%) are male. At the time of the study, their median age was 57.65 years (range, 20–90).                                                                                                                                                              | 761         | Cross-sectional study | Pittsburgh Sleep Quality Index                                                                        | Sleep quality                                           | Mean scores of the 761 participants PSQI, 5.67 ± 4.24 (range, 0–19). Quality of sleep was found bad in 447 (58.7%) (global score ≥5). Multivariate analyses showed active treatment (OR: 21.4; 95% CI: 9.08–50.4; p < 0.001) as the major independent variable that affected sleep quality                                               |
| Karatel et al., 2022   | Turkey            | The study includes 1,778 responses of 1,131                                                                                                                                                                                                                                                                          | 1778        | Cross-sectional       | Pittsburgh Sleep Quality Index                                                                        | Sleep quality                                           | The PSQI-total had shown a weak correlation with pain levels in all body parts.                                                                                                                                                                                                                                                          |

|                     |        |                                                                                                                                                                                                     |      |                       |                                                                                   |                             |                                                                                                                                                                                                                                                                                                                                                                                                                        |
|---------------------|--------|-----------------------------------------------------------------------------------------------------------------------------------------------------------------------------------------------------|------|-----------------------|-----------------------------------------------------------------------------------|-----------------------------|------------------------------------------------------------------------------------------------------------------------------------------------------------------------------------------------------------------------------------------------------------------------------------------------------------------------------------------------------------------------------------------------------------------------|
|                     |        | (63.6%) women and 647 (36.4%) men. Mean age was 28.3 ± 10.7 years with musculoskeletal pain                                                                                                         |      | study                 |                                                                                   |                             | The highest correlation for sleep quality and pain levels was between the PSQI-5 and lower back pain. There was a weak correlation between PSQI-2 and the BDI score, and a moderate correlation between the PSQI-1, PSQI-5, PSQI-7, PSQI-total, and BDI score.                                                                                                                                                         |
| Keskin et al., 2022 | Turkey | 356 pregnant women were enrolled and completed the survey                                                                                                                                           | 356  | Cross-sectional study | The Epworth sleepiness scale                                                      | Sleep disorder (sleepiness) | Mild sleepiness was found in 88.2% and severe sleepiness in 11.8% of the pregnant women                                                                                                                                                                                                                                                                                                                                |
| San et al., 2021    | Turkey | 145 patients who underwent a spine intervention within the past year were included in this study, there were 96 women (66%) and 49 men (34%), with a mean age of 54.78 ± 1.08 years.                | 145  | Cross-sectional study | Survey items developed by the study's author include questions on sleep habits.   | Sleep quality               | 24 patients always had sleep disturbance, 30 patients often had sleep disturbance, 37 patients sometimes had sleep disturbance, 9 patients rarely had sleep disturbance, and 45 patients had no sleep disturbance                                                                                                                                                                                                      |
| Seyahi et al., 2020 | Turkey | Studied in total 771 (245 M/ 526 F) patients with Rheumatic disease (Group 1), 535 (181 M/ 354 F) hospital workers (Group 2) and 917 (258 M/ 659 F) teachers/academic staff (Group 3)               | 2223 | Cross-sectional study | Survey items developed by the study's author include questions on sleep problems. | Sleep disorder              | The frequency of sleep problems in patients with RD was significantly higher than that of the teachers/academic staff, but then again, significantly lower than that reported in the hospital workers.                                                                                                                                                                                                                 |
| Yeni et al., 2022   | Turkey | 89 PwMS (people with multiple sclerosis) and 262 healthy controls. Mean age of PwMS was 41.08 (±10.2) years; 62% were female. Mean age of the control group was 38.08 (±11.4) and 51.5% were female | 351  | Cross-sectional       | Pittsburgh Sleep Quality Index (PSQI)                                             | Sleep quality               | Healthy controls (HC): Compared to pre-pandemic period, the mean PSQI score was determined to increase indicating impaired sleep quality (p<0.001) Sleep quality of the patients was seen to be impaired during the pandemic (p<0.05) Multiple regression analysis demonstrated that the anxiety, depression, and the sleep problems were predictors of both the physical health (p<0.001) and mental health (p<0.001) |

1  
2  
3  
4  
5  
6  
7  
8  
9  
10  
11  
12  
13  
14  
15  
16  
17  
18  
19  
20  
21  
22  
23  
24  
25  
26  
27  
28  
29  
30  
31  
32  
33  
34  
35  
36  
37  
38  
39  
40  
41  
42  
43  
44  
45  
46  
47  
48  
49  
50  
51  
52  
53  
54  
55  
56  
57  
58  
59  
60

For peer review only

# BMJ Open

## The Effects of the COVID-19 Pandemic on Sleep Health Among Middle Eastern and North African (MENA) Populations: A Systematic Review of the Literature

|                                 |                                                                                                                                                                                                                                                                                                                                                                                                                |
|---------------------------------|----------------------------------------------------------------------------------------------------------------------------------------------------------------------------------------------------------------------------------------------------------------------------------------------------------------------------------------------------------------------------------------------------------------|
| Journal:                        | <i>BMJ Open</i>                                                                                                                                                                                                                                                                                                                                                                                                |
| Manuscript ID                   | bmjopen-2022-066964.R2                                                                                                                                                                                                                                                                                                                                                                                         |
| Article Type:                   | Original research                                                                                                                                                                                                                                                                                                                                                                                              |
| Date Submitted by the Author:   | 19-Nov-2022                                                                                                                                                                                                                                                                                                                                                                                                    |
| Complete List of Authors:       | Al-Ajlouni, Yazan; Columbia University Mailman School of Public Health<br>Al Ta'ani, Omar; University of Pittsburgh Medical Center Health System<br>Shamaileh, Ghaith; Tulane University School of Medicine<br>Mushasha, Rand; Charité Universitätsmedizin Berlin<br>Makarem, Nour; Columbia University Mailman School of Public Health<br>Duncan, Dustin; Columbia University Mailman School of Public Health |
| <b>Primary Subject Heading</b>: | Public health                                                                                                                                                                                                                                                                                                                                                                                                  |
| Secondary Subject Heading:      | Infectious diseases                                                                                                                                                                                                                                                                                                                                                                                            |
| Keywords:                       | COVID-19, Public health < INFECTIOUS DISEASES, SLEEP MEDICINE                                                                                                                                                                                                                                                                                                                                                  |
|                                 |                                                                                                                                                                                                                                                                                                                                                                                                                |

SCHOLARONE™  
Manuscripts



I, the Submitting Author has the right to grant and does grant on behalf of all authors of the Work (as defined in the below author licence), an exclusive licence and/or a non-exclusive licence for contributions from authors who are: i) UK Crown employees; ii) where BMJ has agreed a CC-BY licence shall apply, and/or iii) in accordance with the terms applicable for US Federal Government officers or employees acting as part of their official duties; on a worldwide, perpetual, irrevocable, royalty-free basis to BMJ Publishing Group Ltd ("BMJ") its licensees and where the relevant Journal is co-owned by BMJ to the co-owners of the Journal, to publish the Work in this journal and any other BMJ products and to exploit all rights, as set out in our [licence](#).

The Submitting Author accepts and understands that any supply made under these terms is made by BMJ to the Submitting Author unless you are acting as an employee on behalf of your employer or a postgraduate student of an affiliated institution which is paying any applicable article publishing charge ("APC") for Open Access articles. Where the Submitting Author wishes to make the Work available on an Open Access basis (and intends to pay the relevant APC), the terms of reuse of such Open Access shall be governed by a Creative Commons licence – details of these licences and which [Creative Commons](#) licence will apply to this Work are set out in our licence referred to above.

Other than as permitted in any relevant BMJ Author's Self Archiving Policies, I confirm this Work has not been accepted for publication elsewhere, is not being considered for publication elsewhere and does not duplicate material already published. I confirm all authors consent to publication of this Work and authorise the granting of this licence.

Abstract Word Count: 268  
Manuscript Word Count: 4909

The Effects of the COVID-19 Pandemic on Sleep Health Among Middle Eastern and North African (MENA) Populations: A Systematic Review of the Literature

Yazan A. Al-Ajlouni, MPhil<sup>1,2</sup>  
Omar Al Ta'ani, MD<sup>3</sup>  
Ghaith Shamaileh<sup>4</sup>  
Rand Mushasha, BDS<sup>5</sup>  
Nour Makarem, PhD<sup>2</sup>  
Dustin T. Duncan, ScD<sup>2</sup>

1. New York Medical College School of Medicine, Valhalla, New York, 10595, USA
2. Department of Epidemiology, Columbia University Mailman School of Public Health, New York, NY 10032, USA
3. University of Pittsburgh Medical Center, Pittsburgh, Pennsylvania, 15260, USA
4. Tulane University School of Medicine, New Orleans, LA 70112
5. Charité – Universitätsmedizin Berlin Charitéplatz 1, 10117 Berlin, Germany

Correspondence to: Yazan A. Al-Ajlouni, MPhil. New York Medical College School of Medicine, Valhalla, New York, USA 10595. Email: [alajlouni.yazan@gmail.com](mailto:alajlouni.yazan@gmail.com); Tel: +1 - 914 - 484 - 1014

## Abstract

**Objectives:** This study sought to conduct a systematic review of the literature on the impact of the COVID-19 pandemic on sleep health among Middle Eastern and North African (MENA) populations, understudied geographic regions including with regards to sleep health.

**Setting:** A systematic literature search of studies published from inception to March 27<sup>th</sup> 2022 was conducted on multiple databases using developed keywords

**Participants: Studies were included if** they (1) investigated one or more aspects/dimensions of sleep health as an outcome (e.g., sleep duration, sleep quality, sleep problems); (2) measured the impact of a COVID-19 pandemic-related domain (e.g., impact of quarantine, work from home, lifestyle changes, etc.); (3) focused on at least one MENA region population; (4) were peer reviewed; (5) included  $\geq 100$  participants; (6) were written in English; (7) had full-text article publicly available.

**Primary and secondary outcomes measured:** Primary outcomes were sleep duration, sleep quality and sleep problems

**Results:** In line with PRISMA guidelines, 164 studies were included for data extraction. The Newcastle-Ottawa (NOS) scale for cross-sectional studies was used to assess the quality of the studies. Overall, the COVID-19 pandemic significantly impacted sleep duration, sleep quality, and presence and severity of sleep disorders in MENA populations, including adults, children, students, healthcare workers, and people with chronic illnesses. The directionality and strength of associations, as well as the determinants of sleep health, varied by sub-populations.

**Conclusions:** Longitudinal studies are needed to understand the longer-term impact of the COVID pandemic on the sleep health of MENA populations. Sleep health interventions and policy measures should be tailored to the need of each sub-population.

**Trial registration number:** PROSPERO registration number: CRD42022321128.

### Strengths and limitations of this study

- Study design that enabled the capturing of a wide scope of evidence, including both quantitative and qualitative studies among a severely understudied population.
- Comprehensive literature search of five major electronic databases and reporting as per Preferred Reporting Items for Systematic Reviews and Meta-Analyses guidelines.
- Studies included in this review utilized different methods for assessing sleep health, making it challenging to compare results between different studies and populations.
- Most included studies are cross-sectional in design, posing an intrinsic limitation to this review and making it difficult to establish causation.  
Inability to measure for national variations in quarantine policies between countries, which could have had varying effects on the health of the population.

**Keywords:** COVID-19, Sleep Health, Middle East, Health behaviors, Pandemic

## Introduction

The COVID-19 pandemic, which was announced as a Public Health Emergency of International Concern on 30 January 2020, and a pandemic on 11 March 2020, continues to affect people's lives around the globe. Given the nature of transmission of the SARS-CoV-2 virus, in addition to lack of medication or vaccines in the early response of the pandemic, many of the public health interventions to prevent the transmission focused on physical distancing. Such measures included quarantine and lock-down orders. In turn, this affected people's ability to do many social and physical activities, hence significantly impacting people's 24-h behavioral patterns. Further, pandemic-related stress also contributed to abrupt changes in lifestyle behaviors.<sup>1,2</sup> For instance, Park et al., reported that COVID-19 has had a negative impact on healthy and active lifestyles, as well as mental health and quality of life, among a sample of adults in South Korea.<sup>3</sup>

Research in the literature is demonstrating that among the many health outcomes and health behaviors that may be affected by the pandemic is sleep health.<sup>4-8</sup> Prior studies among various populations have shown that the pandemic affected a variety of sleep health domains, including sleep quality,<sup>9-11</sup> sleep duration,<sup>12,13</sup> and sleep disorders.<sup>14,15</sup> For instance, in a longitudinal study in Spain, Martínez-de-Quel reported that perceived sleep problems significantly increased following the onset of the pandemic.<sup>16</sup> Similarly, among 400 students and university administration staff workers in Italy, the prevalence of insomnia increased from 24% prior to the pandemic to 40% during the pandemic. Similarly, difficulties in sleep initiation among the same sample increased from 15% to 42% from before to during the pandemic.<sup>17</sup> A systematic review conducted in July 2020 showed that the prevalence of sleep problems during the COVID-19 pandemic is high and affects approximately 40% of people from the general and health care populations.<sup>18</sup> In addition to the observed trend in sleep health outcomes, the pandemic may have exacerbated a number of stressors that can directly increase poor sleep health. For instance, research among several global populations has shown an increase in intimate partner violence (IPV) due to lockdown measures, as well as economic and psychological stress brought about by the pandemic.<sup>19-21</sup> In turn, IPV has been linked with poor sleep quality and sleep disturbances among different populations.<sup>22,23</sup>

Among Middle Eastern and North African (MENA) populations, the burden of non-communicable diseases has drastically increased from 1990 to 2010.<sup>24</sup> The epidemiological profile of Middle Eastern countries closely resembles that of countries in western Europe, the USA, and Canada, with health loss from most non-communicable diseases, such as CVD and cancer, increasing over the past 20 years.<sup>24</sup> However, Middle Eastern populations are faced with multiple challenges when attempting to deal with such an epidemiological profile. Indeed, political turmoil, conflict, and corruption within states have led to challenges in implementing policies and laws, as well as adhering to them on a population-level.<sup>25</sup> Additionally, while Middle Eastern populations are facing an epidemiological challenge similar to that of the developed world, they continue to be understudied in public health research including sleep health research. In part, this is due to Arab countries having weak health information systems,<sup>26,27</sup> which limits data availability and produces major challenges for sound research and evidence-based policy making.



1  
2  
3 In addition, MENA countries epidemiological profile is characterized by high burden of  
4 psychosocial problems, including depression and anxiety.<sup>24</sup> Noncommunicable diseases and  
5 psychosocial problems, among other health outcomes, are consistently associated with sleep  
6 health.<sup>28-32</sup> Consequently, this exacerbation in poor sleep health that may be brought about by the  
7 pandemic can increase the risk of other undesirable health outcomes among populations. This  
8 issue is of increased urgency in areas with underdeveloped health research infrastructure where  
9 there continues to be lack of full understanding of the health of the population, as is the case in  
10 the MENA region.  
11  
12

13  
14 Given the evident impact the pandemic had on sleep health worldwide, as well as the well-  
15 documented association between sleep health and the leading causes of morbidity and mortality,  
16 it is important to understand this association among Middle Eastern populations. This systematic  
17 review sought to investigate the association between COVID-19 induced national lockdowns and  
18 different domains of sleep health among MENA populations. To the best of our knowledge, this  
19 is the first systematic review investigating sleep health among Middle Eastern populations in the  
20 context of COVID-19. Additionally, and while there are several reviews examining sleep health  
21 domains in developed countries,<sup>33, 34</sup> there continues to be a lack of reviews studying sleep health  
22 in MENA countries, which collectively represent ~600 million of the world population. In fact, this  
23 systematic review would be the first to summarize the literature on the sleep health of MENA  
24 populations, filling an important gap in the literature.  
25  
26  
27  
28  
29  
30  
31  
32  
33  
34  
35  
36  
37  
38  
39  
40  
41  
42  
43  
44  
45  
46  
47  
48  
49  
50  
51  
52  
53  
54  
55  
56  
57  
58  
59  
60

## Methods

A systematic literature search was performed in accordance with PRISMA (Preferred Reporting Items for Systematic Reviews and Meta-Analyses) guidelines.<sup>35</sup> On March 27th, 2022, we conducted a systematic literature review on five different databases, namely PubMed, MEDLINE, Embase, CINAHL, and Web of Science. A set of specific keywords and MeSH terms was developed and is shown in supplementary table S1. The protocol of this systematic review is registered with PROSPERO (international prospective register of systematic reviews) with the ID CRD42022321128. The protocol for this review can be publicly accessed on PROSPERO webpage.

### *Search Strategy and Selection Criteria*

The authors developed a set of keywords relevant to the research question and the population investigated. Boolean operators were used to ensure full inclusion of words within the keywords used. Using Endnote referencing software, retrieved articles were entered and duplicates were identified and removed. Following that, articles were entered into Rayyan, a free web-tool for screening articles for systematic reviews. As shown in figure 1, title and abstract screening was conducted by two investigators (OT and YAA) independently. Next, full-text articles were accessed and screened in more depth. Conflicts were solved by discussion upon the conclusion of the screening process. The articles included were deemed eligible against the following criteria: (1) investigated an aspect sleep health as an outcome of interest (e.g., sleep duration, quality and presence of a sleep problem or disorder); (2) investigated a domain related to the COVID-19 pandemic induced lifestyle changes (e.g., lockdown, online schooling, etc.); (3) focused on at least one MENA population (supplementary table S2 includes a list of all MENA countries included); (4) were peer reviewed; (5) sample size  $\geq 100$  participants (6) were written in English; (7) had full-text article publicly available. Similarly, articles were excluded if they met at least one of the following: (1) were not written in English; (2) were not peer-reviewed; (3) did not have full-text available; (4) were systematic or narrative review in design. Where multiple articles reported data from the same dataset, we selected the article with the largest numbers of variables included and excluded the other articles as duplicates. Finally, there were no restrictions on the nature of data reported and both qualitative and quantitative studies were included in this review. Of note, prior to conducting our systematic search, an initial literature search was conducted by the authors to identify systematic reviews of sleep in relation to COVID-19 pandemic.

### *Data Extraction*

Data extraction was done in accordance with a tabulated form. Two reviewers (OT and YAA) collectively performed the data extraction into a template table. Conflicts were resolved through a discussion and where necessary, a third reviewer. Data was categorized based on sub-populations identified, including adults, children, healthcare workers, students, and people with chronic illnesses. Other dimensions collected for each study included: (1) the first author and year of publication (e.g., reference); (2) location of the study (city and/or country); (3) study population of interest; (4) study sample size; (5) study design; (6) sleep health measurement tool; (7) sleep health domains; (8) main findings summarized.

### *Data Presentation*

All data extracted from identified studies were presented in a tabulated form organized according to the different sub-populations identified among MENA populations. This included: 1) adults; 2) children; 3) healthcare workers; 4) students; 5) people with chronic illnesses. Main summary findings were presented in the tables, in addition to identifying specific factors that were associated with poor sleep health outcomes.

### *Quality Appraisal*

Given that the majority of the studies identified were cross-sectional in design, The Newcastle-Ottawa scale (NOS) was used to assess the quality of the studies. Two reviewers (YAA and OT) independently assessed the risk of bias in all cross-sectional studies. Where necessary, conflicts in scoring were resolved by discussion. Only cross-sectional studies were scored against the NOS, yielding a total of 157 studies for risk assessment. The NOS was developed to assess the quality of nonrandomized studies according to different domains of the studies, including the study's design, content, and ease of use directed to the task of incorporating the quality assessments in the interpretation of meta-analytic results. In accordance with the NOS, the studies were scored against 7 different categories, including (1) selection (4 sub-categories, 4 stars maximum); (2) comparability (1 sub-category; 2 stars maximum); (3) outcome (2 sub-categories; 3 stars maximum). The full list of adapted questions from the NOS is attached as a supplementary file. Additionally, the results of the NOS assessment for our included cross-sectional studies are shown in supplementary table S3.

### *Ethical Approval*

Ethical approval for this specific systematic review is not applicable since data utilized was collected from previously published research in the literature. All studies included in this review received ethical approval prior to data collection by their primary investigator.

### *Patient and Public Involvement*

Patients and public were not involved in the design and conduct of this research

## Results

### 3.1. Search results

As illustrated in figure 1, the systematic literature search yielded 683 studies from PubMed, 152 studies from MEDLINE, 285 studies from Embase, 63 studies from CINAHL, and 110 studies from Web of Science, resulting in a total of 1,293 studies. After removing duplicates (n = 338), 955 articles were screened independently by two investigators for title and abstract to determine relevance to our research question. This step excluded an additional 721 articles either because they did not investigate sleep health as one of the outcomes (n = 535), did not include people from the Middle East, (n = 153), or were not peer reviewed (n = 33). After this step, two independent investigators performed full-text screening on 234 potentially relevant articles. A total of 70 studies were excluded at this stage, mainly due to studies with unavailable full-text article (n=14), studies not reporting sleep health as an outcome (n=24), studies conducted explicitly outside the Middle East (n=24) or had a sample size of less than 100 participants (n = 8). As a result, a total of 164 articles were included in this review.

### 3.2. Study characteristics

The sample size of all included studies (n=164) ranged from 103 to 20,697 participants. Table S4 in the supplementary file presents a full list of all included studies and their extracted data. Furthermore, studies included were conducted across 17 Middle Eastern countries, including Turkey (n=44), Saudi Arabia (n=33), Iran (n=16), Israel (n=12), Jordan (n=12), Egypt (n=10), Oman, (n=6), United Arab Emirates (n=6), Lebanon (n=6), Kuwait (n=4), and Qatar (n=2). Only one study was conducted in each of the following countries: Bahrain, Palestine, Cyprus, and Iraq. Additionally, 11 studies included samples from multiple countries at once, including Syria, Yemen, Iraq, and others.

### 3.3. Quality appraisal

Most studies in this review were cross-sectional in design (n=156). All other study designs were longitudinal (n=8). Table S3 in the supplementary file presents the full NOS results for all studies assessed for bias, determined using the NOS protocol outlined in the Methods section. Most studies were moderate in quality.

### 3.4. Sleep health outcomes by sub-population

Data from all eligible studies was organized according to population type, with a total of five sub-populations. These included studies focusing on adults in the general population (n=74), healthcare workers (n=47), students (n=21), children (n=15), and people with chronic illnesses (n=7). For all populations, qualitative data synthesis was conducted with a focus on three main domains: sleep duration, sleep quality, and sleep disorders.

#### 3.4.1. Adults

1  
2  
3 Across the studies conducted among adults (n=74), the sample size ranged from 103 to 14,171  
4 participants.  
5

### 6 *Sleep Duration*

7  
8 Studies consistently reported that the pandemic negatively impacted the sleep duration of Middle  
9 Eastern adults<sup>36-44</sup>. In a global study including 5896 adults from 11 MENA countries, 49.6% of  
10 participants reporting that they were sleeping less than 7 hours and 53.2% reporting 10 or more  
11 hours of sleep.<sup>36</sup> In Egypt, 23.1% of adults younger than 30 years old reported inadequate  
12 sleeping (< 6h/day).<sup>45</sup> In terms of determinants of sleep duration among adults, data from Jordan  
13 revealed an increased burden of short sleep duration among males compared to females.  
14 Similarly, participants with higher education levels reported decreased daytime sleeping hours.<sup>46</sup>  
15 In terms of relationship status, individuals who reported being single had significantly increased  
16 amount of sleep compared to married individuals.<sup>46</sup>  
17  
18  
19

### 20 *Sleep Quality*

21  
22 Sleep quality (SQ) was altered for both COVID-19 patients and healthy individuals.<sup>47</sup> The  
23 Pittsburgh Sleep Quality Index (PSQI) score during lockdown was predominantly influenced by  
24 sleep-onset latency, sleep efficiency, and total sleep time.<sup>48</sup> Factors associated with reduced SQ  
25 included changes in sleeping habits, anxiety, fear driven by COVID-19 news and lack of treatment  
26 knowledge, female gender, monthly income, isolation,<sup>49</sup> perceived income, hours spent outdoors,  
27 the number of familiar people with COVID-19, and history of depression.<sup>50</sup>  
28  
29  
30

### 31 *Sleep Problems*

32  
33 Most families reported disrupted sleep patterns.<sup>51</sup> When quarantine period started in Saudi  
34 Arabia, 1/5 experienced new-onset nightmares, more significant among females.<sup>52</sup> In a global  
35 cross-sectional study including a number of Middle Eastern countries, around 33.3% of  
36 respondents reported feeling lazy and less energized during the pandemic, as opposed to 4.7%  
37 before the pandemic.<sup>53</sup> The prevalence of insomnia, anxiety, depression, and obesity increased  
38 with increasing phone screen time among university students. Of all countries, Iran reported the  
39 highest prevalence of insomnia among adults (55.2%).<sup>47, 54</sup> Finally, in a Turkey-based study  
40 among pregnant women, mild sleepiness was found in 88.2% of participants (n = 356), while  
41 severe sleepiness was reported in 11.8% of the same sample.<sup>55</sup>  
42  
43  
44

### 45 *3.4.2. Children*

46  
47 A total of 15 studies assessed sleep health among children. The sample size of studies ranged  
48 from 309 to 20,697 participants.  
49

### 50 *Sleep Duration*

51  
52  
53 Most studies in the literature reported a change in the sleeping duration among children, with  
54 varying directions of change (e.g., increased, or decreased duration). In Saudi Arabia and Jordan,  
55 decreased sleep was reported among children's populations.<sup>56, 57</sup> Moreover, sleep duration in  
56  
57  
58  
59

1  
2  
3 Israel increased for 13.4% of participants, decreased for 51.1%, and remained unchanged for  
4 35.1%. Sleeping less than seven hours decreased from 41.4% to 5.4%, while sleeping more than  
5 10 hours significantly increased from 4.8% to 49.7%.<sup>58</sup> In Iran 13.4% of children, mostly from  
6 urban areas, reported that they had 5 or fewer hours of sleep.<sup>59</sup>  
7

### 8 *Sleep Quality*

9

10 In Tukey, 61.5% of children experienced sleeping changes due to the pandemic.<sup>60</sup> Almhizai et al.,  
11 demonstrated that older participants woke up more frequently during their sleep compared to  
12 children.<sup>61</sup> In Israel, 41.4% of children developed sleeping difficulties.<sup>62</sup> Similarly, in another Israeli  
13 study, 60% of mothers reported that their child's sleeping patterns had changed drastically and  
14 reported higher levels of anxiety traits associated with sleep changes.  
15  
16

### 17 *Sleep Problems*

18

19 Sleep disorders were reported in all studies among children. In Turkey, the prevalence of sleep  
20 disturbances among children was 55.5% and significantly associated with 6–8 years of age and  
21 poor family relationships. The most common sleep disturbances were bedtime resistance (51.9%)  
22 and sleep onset delay (61.4%).<sup>63</sup> Sleep disturbances were more common in children of parents  
23 who felt helpless, apprehensive, and frightened during the pandemic,<sup>63</sup> and children whose  
24 parents were divorced.<sup>61</sup> The direct effect of trauma scores on sleep problems, the direct effect  
25 of sleep problems on chronotype scores and on oppositional defiant disorder (ODD) symptom  
26 scores were significant.<sup>64</sup>  
27  
28  
29

### 30 *3.4.3. Healthcare workers*

31

32 A total of 47 studies assessed sleep health among healthcare workers in all Middle Eastern  
33 countries listed in the study characteristics, except Palestine, Cyprus, and Iraq. The sample size  
34 of studies ranged from 105 to 2,331 participants.  
35  
36

### 37 *Sleep Duration*

38

39 Sleep duration significantly decreased for HCWs in most countries, except Israel, where medical  
40 residents treating COVID-19 reported longer sleep duration.<sup>65</sup> In Egypt, both physicians on the  
41 front line and others were at risk of falling asleep, staying asleep, or sleeping excessively.<sup>66</sup>  
42 Furthermore, there was a statistically significant decrease in sleeping hours among HCWs with  
43 severe and extremely severe depression.<sup>67</sup> Those with higher levels of health anxiety related to  
44 COVID-19 were working more days weekly and had lower sleeping hours.<sup>68</sup> Female sex, age  $\leq 30$   
45 years, attending emergency and night shifts, watching/reading COVID-19 news  $\geq 2$  h/day, and not  
46 getting emotional support from family, society, and hospitals were associated with a high  
47 likelihood of inadequate sleeping HCW in Egypt.<sup>69</sup>  
48  
49  
50

### 51 *Sleep Quality*

52

53 Most studies reported poor and reduced SQ, as measured by the PSQI, with poor sleep quality  
54 prevalence ranging from 48.4%<sup>70</sup> to 96.1%.<sup>71</sup> Both, front line HCWs and non-front line HCW  
55  
56  
57  
58  
59  
60

1  
2  
3 reported poor SQ and/or had moderate-severe stress.<sup>72</sup> In Saudi Arabia poor SQ levels were  
4 highest among front line HCWs (emergency departments, intensive care units, and wards).<sup>73</sup> The  
5 most negatively scored components of SQ included sleep latency, duration, and efficacy. Poor  
6 SQ was more prevalent among females, nurses, hospital workers, frontline workers, individuals  
7 with <5 years of work experience, those with low social support, and individuals with increased  
8 traumatic stress levels.<sup>74</sup>  
9  
10

### 11 *Sleep Problems*

12  
13 HCWs between 31-40 years-old treating COVID-19 were at higher risk of severe insomnia,  
14 compared to those above 40 years-old.<sup>75</sup> In Turkey, insomnia incidence was 1.5 times higher for  
15 HCWs in the frontline and significantly higher amongst those working in the “area of final  
16 diagnosis”.<sup>76</sup> In a tertiary care hospital in Oman, the majority of HCWs (60.2%) aged  
17  $34.8 \pm 5.7$  years and with less working experience ( $11.9 \pm 5.9$  years) reported clinical insomnia  
18 during the pandemic.<sup>77</sup> Mean Insomnia Severity Index score in Turkey was significantly higher  
19 among HCWs working in COVID-19 clinics and intensive care units and among nurses.<sup>74</sup>  
20  
21  
22

### 23 3.4.4. *Students*

24  
25 A total of 21 studies with sample sizes ranging from 152 to 17,008 participants assessed sleep  
26 health among students.  
27

### 28 *Sleep Duration*

29  
30  
31 Among a large cohort of medical and science university students in Jordan, 44.2% of participants  
32 ( $n = 1019$ ) reported reduction in their sleeping hours.<sup>78</sup> Another study reported a statistical  
33 increase of total sleeping time from  $6.6 \pm 2.3$  h/day to  $8.3 \pm 2.7$  h/day.<sup>79</sup> In Israel, a significant  
34 reduction in sleep duration from lockdown to post-lockdown period for workdays and weekends  
35 was reported.<sup>80</sup>  
36  
37

### 38 *Sleep Quality*

39  
40  
41 Furthermore, 85.55% of students reported poor SQ and 67.9% were females. It was found that  
42 sleep disturbance and daytime dysfunction were poorer in students with higher BMI ranges.<sup>81</sup> In  
43 Saudi Arabia, 25.9% of a sample of students reported poor SQ, 22.7% felt tired during the day,  
44 9.3% had nightmares and 5.2% had poor dreams.<sup>82</sup> Furthermore, extended quarantine negatively  
45 affected SQ of three-quarters of the undergraduate students in Jordan, with poor sleep quality  
46 reported in nearly half of the same sample.<sup>83</sup> Additionally, about a third of the same sample  
47 reported sleeping late and waking up more frequently.<sup>83</sup>  
48  
49

### 50 *Sleep Problems*

51  
52 In Saudi Arabia, 22% of students had trouble falling asleep, 17.9% waking up during the night,  
53 and 8.8% waking up early in the morning.<sup>82</sup> Students reported a statistically high level of insomnia  
54 with a high level of depression, anxiety, and perceived stress. Undergraduate students reported  
55 statistically more insomnia symptoms with a lower level of psychological resilience.<sup>82</sup>  
56  
57  
58  
59  
60

1  
2  
3 Furthermore, lockdown in Turkey led to sleeping later, waking up frequently and failing to fall  
4 asleep.<sup>84</sup> In Saudi Arabia, medical students reported Narcolepsy (51.6%), insomnia (31.5%), and  
5 Circadian Rhythm Sleep Disorder (22.4%) as the most prevalent sleep disorders.<sup>85</sup> Furthermore,  
6 a statistically significant increase of night sleep interruptions was reported during COVID-19. In  
7 Jordan, students experienced increased insomnia, shallow sleep, nightmares, or insufficient  
8 sleep, and these disorders were reported in significantly more females than males.<sup>86</sup>  
9  
10

### 11 3.4.5. *People with chronic illnesses*

12  
13 A total of 7 cross-sectional design studies assessed sleep health among the population with  
14 special conditions. The sample size of studies ranged from 145 to 2,223 participants. Those  
15 studies focused on a variety of chronic illnesses, including epilepsy (n=1), neurological conditions  
16 (n=1), cancer (n=1), musculoskeletal diseases (n=1), spine illnesses (n=1), rhematic disease (RD)  
17 (n=1), and multiple sclerosis (MS) (n=1).  
18  
19

#### 20 *Sleep Duration*

21  
22 In Saudi Arabia, 71.2% of patients with epilepsy experienced significant changes in their sleep.<sup>87</sup>  
23 <sup>88</sup> Almost half of them had been seizure-free in the three months prior to the pandemic.  
24 Furthermore, 9.6% of patients surveyed reported more sleep than usual, 2.6% reported less  
25 sleep, and 0.6% reported intermittent sleep.<sup>87, 88</sup>  
26  
27

#### 28 *Sleep Quality*

29  
30 Quality of sleep among different patient groups, as measured by PSQI, was affected during the  
31 pandemic. In Turkey, for patients with musculoskeletal pain, PSQI revealed a weak correlation  
32 with pain levels in all body parts.<sup>89</sup> Quality of sleep was found to be bad for 58.7% cancer  
33 patients.<sup>90</sup> Depression, anxiety, and defective SQ levels for pregnant women (mean age was  
34  $30.17 \pm 5.47$  years) who were previously in quarantine was significantly higher.<sup>91</sup> SQ among  
35 patients with MS patients was significantly impaired during the pandemic too.<sup>92</sup>  
36  
37  
38

#### 39 *Sleep Problems*

40  
41 Although patients reported different experiences, a certain degree of sleep disorders was reported  
42 among almost all patients. In Jordan, Athamneh et al., reported that 37.5% of patients with chronic  
43 headaches reported changes in sleeping patterns during the COVID-19 pandemic.<sup>93</sup> Finally, the  
44 frequency of sleep problems in patients with RD was significantly higher than that of non-patients,  
45 but significantly lower than that reported in hospital workers.<sup>94</sup>  
46  
47  
48  
49  
50  
51  
52  
53  
54  
55  
56  
57  
58  
59  
60



## Discussion

This systematic review of the literature explored the impact of the COVID-19 pandemic on sleep health among populations in the Middle East. To the best of our knowledge, this is the very first systematic review on sleep health among any Middle Eastern population, and one of the first reviews to pool evidence on sleep health during the ongoing COVID-19 pandemic. The findings of our systematic review suggest that across all sub-populations (e.g., adults, children, students, healthcare workers, and people with chronic illnesses), the COVID-19 pandemic had a drastic negative impact on sleep duration, sleep quality, and prevalence of sleep disorders.

Sleep duration was negatively impacted in all populations investigated, whereby the prevalence of short or long sleep seems to have increased. Similarly, sleep quality in all populations decreased drastically. Studies reported a consistent association between sociodemographic variables (e.g., being single,<sup>44, 95-97</sup> low education levels,<sup>95, 97-101</sup> unemployment during the pandemic,<sup>102</sup> female gender,<sup>49, 96</sup> low social support<sup>74, 103</sup>) and poorer sleep quality. Furthermore, with regards to sleep problems, insomnia was the most reported sleeping problem across studies. Higher prevalence of insomnia and other sleep disorders were observed among younger participants, those with a diagnosed mental disorder, unmarried participants, and undergraduate students.<sup>104</sup> Such findings suggest that psychological stressors, which may have been exacerbated by the pandemic,<sup>105, 106</sup> are associated with sleep problems and contributed to its high prevalence during the pandemic. Moreover, women reported higher rates of insomnia compared to men. Interestingly, there was an observed positive association between lockdown duration and the prevalence of insomnia. Finally, among people with chronic illnesses, reversal of sleeping pattern (e.g., initiating sleep after sunrise) was the most frequent change in sleep habits.<sup>87</sup>

When comparing different sub-populations in this study, HCWs' sleep health was the most impaired during the pandemic compared with other sub-populations. While in other populations sleep duration was affected with no specific trend, healthcare workers demonstrated predominantly decreased sleep duration. Furthermore, in addition to reduced sleep duration, front line HCWs reported the lowest SQ. Among HCWs, being on the front-line, being younger, and having less experience working were all associated with increased insomnia prevalence. Nurses experienced emotional exhaustion, and burnout levels increased in line with insomnia.<sup>107</sup> Long shifts, busy working conditions, and less sleep disturbed their sleeping patterns and made HCWs feel tired.

Our findings are consistent with prior research in other populations.<sup>7, 18, 108, 109</sup> For instance, Jahrami et al., reported an increased burden of sleep problem during the COVID-19 pandemic in early 2021, with approximately 40% of the general population reporting sleep problems.<sup>18</sup> Similarly, and consistent with our findings among Middle Eastern front-line workers, a meta-analysis conducted by Salari et al., showed that healthcare workers are more vulnerable to sleep disturbances during the pandemic.<sup>109</sup> This finding was associated with increased workplace stress and was shown in both nurses and physicians.<sup>109</sup>

1  
2  
3 The findings of this systematic review are important for public health policy and for directing  
4 intervention measures. Given that sleep is a risk factor for the leading causes of death including  
5 CVD, hypertension, diabetes, obesity, etc., interventions that promote sleep health are of high  
6 public health relevance, particularly in the current pandemic era. Such interventions can include  
7 social and administrative support, workplace interventions,<sup>110</sup> providing education that  
8 emphasizes the importance of sleep behavior, encouraging promoting behaviors and relaxation  
9 strategies. The differences in impact and severity of sleep health problems among different sub-  
10 populations, as identified in this study, suggest that policies and interventions should be tailored  
11 to each population. Some authors have already suggested emergency management measures  
12 that should be taken to improve the quality of sleep in FLHCWs during a pandemic: strengthen  
13 exercise intervention, psychological counseling, drug intervention treatment strategies if  
14 necessary, and other.<sup>111</sup> Similarly, sleep problems in childhood are linked with impaired motor  
15 and cognitive skills, as well as with difficulties in academic activities, emotional regulation, quality  
16 of life, growth, body composition, and immune function.<sup>112</sup> A daily routine is a fundamental aspect  
17 of children's development of healthy behaviors and adequate energy levels. Interventions that  
18 focus on health promotion and advocating for healthy sleeping patterns among children,  
19 especially as it relates to other health behaviors development, should be implemented.  
20  
21  
22  
23  
24

25 In addition to intervention efforts to address poor sleep among MENA populations, there is a  
26 strong need to understand barriers to adequate sleep among each sub-population. The current  
27 literature provides evidence regarding barriers to adequate sleep focuses primarily on western  
28 populations. This includes environmental factors (e.g., decreased green space),<sup>113, 114</sup> social  
29 factors (e.g., decreased social cohesion,<sup>115</sup> decreased safety),<sup>116-118</sup> and ambient factors (e.g.,  
30 increased air pollution,<sup>119-123</sup> increased noise).<sup>124</sup> However, there continues to be a lack of data on  
31 this topic in the MENA region despite high prevalence of poverty, gender inequality, political  
32 turmoil, violence, and other factors that are strongly linked with PTSD and other psychological  
33 factors, which are known to affect sleep.<sup>125, 126</sup> The unique social, structural, and environmental  
34 context of the MENA region, in addition to the demonstrated exacerbation of poor sleep health by  
35 the pandemic, highlights why increased efforts to understand and address sleep health,  
36 particularly post-pandemic, is relevant for MENA populations.  
37  
38  
39  
40

### 41 **Strengths, limitations, and future research**

42  
43 This review is the first systematic review of the literature regarding the effects of COVID-19  
44 pandemic on the sleep health of Middle Eastern populations. Additionally, this paper provides a  
45 robust qualitative synthesis of data to include a wide scope of research on the topic published to  
46 date. This review covers a wide range of outcomes (e.g., any study that reported a sleep health  
47 related domain), includes only peer-reviewed articles as the source of information of high quality,  
48 and incorporates a wider scope of studies and populations. Despite those strengths, this study is  
49 not without noteworthy limitations that must be considered when interpreting our results. Firstly,  
50 most included studies are cross-sectional in design, which poses an intrinsic limitation given the  
51 design. For instance, it is not possible to establish causation with such studies. Additionally, most  
52 of the studies utilize self-reported surveys. Given the rapidly evolving situation with the pandemic  
53 (e.g., lockdown measures, changes in epidemiology of COVID-19, etc.), this approach seemed  
54  
55  
56  
57  
58  
59  
60

1  
2  
3 the most suitable to collect data rapidly. However, this introduces several limitations including  
4 self-selection bias, recall bias, and social desirability bias.<sup>127-129</sup> Another limitation specific to the  
5 design of this review is that it excludes studies conducted in languages other than English.  
6 Moreover, quarantine requirements differed across different countries within the MENA region,  
7 which could have had varying effects on the health of the population. This variation was  
8 challenging to capture and control for within our review and must be a consideration when  
9 interpreting our results.  
10  
11

12 Furthermore, studies included in this review utilized different methods for assessing sleep health,  
13 which varied across populations. Mainly, this included subjective measures, including a variety of  
14 tools to measure sleep health (e.g., Pittsburgh Sleep Quality Index, Insomnia Severity Index). In  
15 turn, this makes it challenging to compare results between different studies and different  
16 populations. Additionally, it is important to note that no study included in this review utilized  
17 objective tools to measure sleep health (e.g., actigraphy), and many studies utilized tools that do  
18 not have demonstrated validity or reliability in the context of sleep health measurement (e.g.,  
19 surveys developed by authors of the study). Consequently, future research should focus on  
20 utilizing objective tools to measure sleep health. If not feasible, subjective tools with demonstrated  
21 reliability and validity are preferred. Finally, future research should continue to understand the  
22 long-term impacts of the abrupt change in lifestyle brought about by the COVID-19 pandemic on  
23 Middle Eastern populations.  
24  
25  
26  
27  
28  
29  
30  
31  
32  
33  
34  
35  
36  
37  
38  
39  
40  
41  
42  
43  
44  
45  
46  
47  
48  
49  
50  
51  
52  
53  
54  
55  
56  
57  
58  
59  
60

## Conclusions

This review sought to review and investigate the evidence between COVID-19 induced lockdowns on sleep health among different populations in the MENA region. Given high burden of poor sleep that has been exacerbated by the COVID pandemic, there is a strong need for tailored interventions to improve sleep health. Finally, and considering that Middle Eastern populations continue to be severely understudied in public health, future research should continue to investigate and explore the impact of the COVID-19 pandemic on public health in The Middle East, including longitudinal studies utilizing objective measures to assess the impact of sleep on the health of MENA populations across their lives.

For peer review only

## Declarations

### *Ethics approval and consent to participate*

Not Applicable

### *Consent for publication*

Not Applicable

### *Availability of data and materials*

All data generated or analyzed during this study are included in this published article and its supplementary information files

### *Competing interests*

The authors declare that they have no competing interests

### *Funding*

No funding to declare

### *Authors' contributions*

Y.A.A and O.T conceived the hypothesis. Y.A.A and O.T designed the study. Y.A.A, O.T, D.D. drafted the protocol. Y.A.A designed the search strategy and performed the literature search. Y.A.A, O.T., and R.M performed the article screening and data extraction. Y.A.A., O.T, and G.S performed the quality assessment. All authors (Y.A.A., O.T., G.S., R.M., N.M., D.D.,) had access to data and verified it, and contributed feedback to drafts of the manuscript. Y.A.A and O.T shaped the manuscript with input from the entire team. All authors (Y.A.A., O.T., G.S., R.M., N.M., D.D.,) contributed to revise work for important intellectual content, gave the final approval of the version to be published, and agreed on all aspects of the work, especially concerning its design, accuracy and integrity. The corresponding author confirms that all listed authors meet authorship criteria and that no others meeting the criteria have been omitted.

### *Acknowledgements*

We would like to thank the authors of the respective studies included in this review, as well as the participants of those studies.

1  
2  
3 **Figure Legends**  
4

5 **Fig. 1.** Preferred Reporting Items for Systematic Reviews and Meta-Analyses (PRISMA) study  
6 selection flow diagram outlining the literature review process when searching for articles on  
7 PubMed and Web of Science  
8  
9

10  
11  
12  
13  
14  
15  
16  
17  
18  
19  
20  
21  
22  
23  
24  
25  
26  
27  
28  
29  
30  
31  
32  
33  
34  
35  
36  
37  
38  
39  
40  
41  
42  
43  
44  
45  
46  
47  
48  
49  
50  
51  
52  
53  
54  
55  
56  
57  
58  
59  
60

For peer review only

## References

1. Wang C, Pan R, Wan X, Tan Y, Xu L, Ho CS, et al. Immediate psychological responses and associated factors during the initial stage of the 2019 coronavirus disease (COVID-19) epidemic among the general population in China. *International journal of environmental research and public health*. 2020;17(5):1729.
2. Dossett ML, Fricchione GL, Benson H. A new era for mind–body medicine. *The New England journal of medicine*. 2020;382(15):1390.
3. Park K-H, Kim A-R, Yang M-A, Lim S-J, Park J-H. Impact of the COVID-19 pandemic on the lifestyle, mental health, and quality of life of adults in South Korea. *PLoS One*. 2021;16(2):e0247970.
4. Jahrami HA, Alhaj OA, Humood AM, Alenezi AF, Fekih-Romdhane F, AlRasheed MM, et al. Sleep disturbances during the COVID-19 pandemic: A systematic review, meta-analysis, and meta-regression. *Sleep Med Rev*. 2022;62:101591.
5. Yuksel D, McKee GB, Perrin PB, Alzueta E, Caffarra S, Ramos-Usuga D, et al. Sleeping when the world locks down: correlates of sleep health during the COVID-19 pandemic across 59 countries. *Sleep Health*. 2021;7(2):134-42.
6. Hisler GC, Twenge JM. Sleep characteristics of US adults before and during the COVID-19 pandemic. *Social Science & Medicine*. 2021;276:113849.
7. Alimoradi Z, Broström A, Tsang HWH, Griffiths MD, Haghayegh S, Ohayon MM, et al. Sleep problems during COVID-19 pandemic and its' association to psychological distress: A systematic review and meta-analysis. *EClinicalMedicine*. 2021;36:100916.
8. Lin YN, Liu ZR, Li SQ, Li CX, Zhang L, Li N, et al. Burden of sleep disturbance during COVID-19 pandemic: a systematic review. *Nature and Science of Sleep*. 2021;13:933.
9. Kocevskaja D, Blanken TF, Van Someren EJ, Rösler L. Sleep quality during the COVID-19 pandemic: not one size fits all. *Sleep medicine*. 2020;76:86-8.
10. Pinto J, van Zeller M, Amorim P, Pimentel A, Dantas P, Eusébio E, et al. Sleep quality in times of Covid-19 pandemic. *Sleep medicine*. 2020;74:81-5.
11. Gupta R, Grover S, Basu A, Krishnan V, Tripathi A, Subramanyam A, et al. Changes in sleep pattern and sleep quality during COVID-19 lockdown. *Indian journal of psychiatry*. 2020;62(4):370.
12. Kumari A, Ranjan P, Vikram NK, Kaur D, Sahu A, Dwivedi SN, et al. A short questionnaire to assess changes in lifestyle-related behaviour during COVID 19 pandemic. *Diabetes & Metabolic Syndrome: Clinical Research & Reviews*. 2020;14(6):1697-701.
13. Benham G. Stress and sleep in college students prior to and during the COVID-19 pandemic. *Stress and Health*. 2021;37(3):504-15.
14. Alimoradi Z, Broström A, Tsang HW, Griffiths MD, Haghayegh S, Ohayon MM, et al. Sleep problems during COVID-19 pandemic and its' association to psychological distress: A systematic review and meta-analysis. *EClinicalMedicine*. 2021;36:100916.
15. Peretti-Watel P, Alleaume C, Léger D, Beck F, Verger P, Group C. Anxiety, depression and sleep problems: a second wave of COVID-19. *General Psychiatry*. 2020;33(5).
16. Martínez-de-Quel Ó, Suárez-Iglesias D, López-Flores M, Pérez CA. Physical activity, dietary habits and sleep quality before and during COVID-19 lockdown: A longitudinal study. *Appetite*. 2021;158:105019.
17. Marelli S, Castelnuovo A, Somma A, Castronovo V, Mombelli S, Bottoni D, et al. Impact of COVID-19 lockdown on sleep quality in university students and administration staff. *Journal of neurology*. 2021;268(1):8-15.
18. Jahrami H, BaHammam AS, Bragazzi NL, Saif Z, Faris M, Vitiello MV. Sleep problems during the COVID-19 pandemic by population: a systematic review and meta-analysis. *J Clin Sleep Med*. 2021;17(2):299-313.

19. Moreira DN, da Costa MP. The impact of the Covid-19 pandemic in the precipitation of intimate partner violence. *International journal of law and psychiatry*. 2020;71:101606.
20. Agüero JM. COVID-19 and the rise of intimate partner violence. *World development*. 2021;137:105217.
21. Gosangi B, Park H, Thomas R, Gujrathi R, Bay CP, Raja AS, et al. Exacerbation of physical intimate partner violence during COVID-19 lockdown. *Radiology*. 2020.
22. Rauer AJ, El-Sheikh M. Reciprocal pathways between intimate partner violence and sleep in men and women. *Journal of Family Psychology*. 2012;26(3):470.
23. Sanchez SE, Islam S, Zhong Q-Y, Gelaye B, Williams MA. Intimate partner violence is associated with stress-related sleep disturbance and poor sleep quality during early pregnancy. *PloS one*. 2016;11(3):e0152199.
24. Mokdad AH, Jaber S, Aziz MIA, AlBuhairan F, AlGhaithi A, AlHamad NM, et al. The state of health in the Arab world, 1990–2010: an analysis of the burden of diseases, injuries, and risk factors. *The Lancet*. 2014;383(9914):309-20.
25. Guetat I. The effects of corruption on growth performance of the MENA countries. *Journal of Economics and Finance*. 2006;30(2):208-21.
26. Organization WH. Country health information systems: a review of the current situation and trends. Geneva: WHO. 2011.
27. Organization WH. Health systems priorities in the Eastern Mediterranean Region: challenges and strategic directions. 2004.
28. Jarasvaraparn C, Zlomke K, Vann NC, Wang B, Crissinger KD, Gremse DA. The relationship between sleep disturbance, quality of life and psychosocial functioning in pediatric patients with inflammatory bowel disease. *Annals of gastroenterology and digestive disorders*. 2018;1(1):9.
29. Gómez-Olivé FX, Rohr JK, Roden LC, Rae DE, von Schantz M. Associations between sleep parameters, non-communicable diseases, HIV status and medications in older, rural South Africans. *Scientific reports*. 2018;8(1):1-11.
30. Basnet S, Merikanto I, Lahti T, Männistö S, Laatikainen T, Vartiainen E, et al. Associations of common chronic non-communicable diseases and medical conditions with sleep-related problems in a population-based health examination study. *Sleep Science*. 2016;9(3):249-54.
31. Nowowiejska J, Baran A, Flisiak I. Mutual relationship between sleep disorders, quality of life and psychosocial aspects in patients with psoriasis. *Frontiers in Psychiatry*. 2021:1086.
32. Lies J, Mellor A, Jobson L, Drummond SP. Prevalence of sleep disturbance and its relationships with mental health and psychosocial issues in refugees and asylum seekers attending psychological services in Australia. *Sleep Health*. 2019;5(4):335-43.
33. Itani O, Jike M, Watanabe N, Kaneita Y. Short sleep duration and health outcomes: a systematic review, meta-analysis, and meta-regression. *Sleep medicine*. 2017;32:246-56.
34. Jike M, Itani O, Watanabe N, Buysse DJ, Kaneita Y. Long sleep duration and health outcomes: a systematic review, meta-analysis and meta-regression. *Sleep medicine reviews*. 2018;39:25-36.
35. Moher D, Liberati A, Tetzlaff J, Altman DG, Group\* P. Preferred reporting items for systematic reviews and meta-analyses: the PRISMA statement. *Annals of internal medicine*. 2009;151(4):264-9.
36. Abouzid M, El-Sherif DM, Elteawy NK, Dahman NBH, Okasha SA, Ghozy S, et al. Influence of COVID-19 on lifestyle behaviors in the Middle East and North Africa Region: a survey of 5896 individuals. *J Transl Med*. 2021;19(1):129.
37. Al-Musharaf S. Prevalence and predictors of emotional eating among healthy young Saudi women during the COVID-19 pandemic. *Nutrients*. 2020;12(10):1-17.



38. Al-Saleh MM, Alamri AM, Alhefzi AA, Assiri KK, Moshebah AY. Population healthy lifestyle changes in Abha city during COVID-19 lockdown, Saudi Arabia. *Journal of family medicine and primary care*. 2021;10(2):809-15.
39. Abed Alah M, Abdeen S, Kehyayan V, Bougmiza IAP. The Impact of Changes in Work Arrangements During COVID-19 Pandemic on the Lifestyle of Qatar's Working Population. *Journal of Occupational & Environmental Medicine*. 2022;64(2):e53-e9.
40. Alghamdi AA, Alafif NO, Bahammam AS, Almuammar M, Alharbi NS, Alhefdhi NA, et al. Nightmares' Pattern and Predictors among a Saudi University Students during COVID-19 Pandemic. *International Journal of Environmental Research and Public Health*. 2022;19(3).
41. Alharbi AS, Alshahrani SM, Alsaadi MM, Al-Jahdali HH, Wali SO, BaHammam AS. Sleep quality and insomnia during the covid-19 lockdown among the saudi public. *Saudi Medical Journal*. 2021;42(4):384-90.
42. Cheikh Ismail L, Hashim M, Mohamad MN, Hassan H, Ajab A, Stojanovska L, et al. Dietary Habits and Lifestyle During Coronavirus Pandemic Lockdown: Experience From Lebanon. *Frontiers in nutrition*. 2021;8:730425.
43. Galali Y. The impact of COVID-19 confinement on the eating habits and lifestyle changes: A cross sectional study. *Food Sci Nutr*. 2021;9(4):2105-13.
44. Hammouri H, Almomani F, Abdel Muhsen R, Abughazzi A, Daghmash R, Abudayah A, et al. Lifestyle Variations during and after the COVID-19 Pandemic: A Cross-Sectional Study of Diet, Physical Activities, and Weight Gain among the Jordanian Adult Population. *International journal of environmental research and public health*. 2022;19(3).
45. Arafa A, Mohamed A, Saleh L, Senosy S. Psychological Impacts of the COVID-19 Pandemic on the Public in Egypt. *Community mental health journal*. 2021;57(1):64-9.
46. Alomari MA, Alzoubi KH, Khabour OF, Darabseh MZ. Sleeping habits during COVID-19 induced confinement: A study from Jordan. *Heliyon*. 2021;7(12).
47. Alshumrani R, Qanash S, Aldobyany A, Alhejaili F, AlQassas I, Shabrawishi M, et al. Sleep quality and mental health in coronavirus disease 2019 patients and general population during the pandemic. *Annals of Thoracic Medicine*. 2022;17(1):21-7.
48. Romdhani M, Rae DE, Nédélec M, Ammar A, Chtourou H, Al Horani R, et al. COVID-19 Lockdowns: A Worldwide Survey of Circadian Rhythms and Sleep Quality in 3911 Athletes from 49 Countries, with Data-Driven Recommendations. *Sports Med*. 2021:1-16.
49. AlRasheed MM, Alkadir AM, Bin Shuqiran KI, Al-Aqeel S, Jahrami HA, BaHammam AS. The Impact of Quarantine on Sleep Quality and Psychological Distress During the COVID-19 Pandemic. *Nature and Science of Sleep*. 2021;13:1037-48.
50. Torkian S, Akhlaghi E, Khosravi V, Etesami R, Ahmadi A, Khanjani N, et al. Depression symptoms and sleep quality during COVID-19 outbreak in Iran: A national cross-sectional study. *Iranian Journal of Psychiatry and Behavioral Sciences*. 2021;15(1).
51. Al Gharaibeh F, Gibson L. The impact of COVID-19 quarantine measures on the mental health of families. *Journal of Social Work*.
52. Alghamdi AN, Alotaibi MI, Alqahtani AS, Al Aboud D, Abdel-Moneim AS. BNT162b2 and ChAdOx1 SARS-CoV-2 Post-vaccination Side-Effects Among Saudi Vaccinees. *Frontiers in Medicine*. 2021;8.
53. Cheikh Ismail L, Osaili TM, Mohamad MN, Al Marzouqi A, Jarrar AH, Abu Jamous DO, et al. Eating Habits and Lifestyle during COVID-19 Lockdown in the United Arab Emirates: A Cross-Sectional Study. *Nutrients*. 2020;12(11).
54. Akbarpour S, Nakhostin-Ansari A, Haghghi KS, Etesam F, Alemohammad ZB, Aghajani F, et al. COVID-19 Fear Association with Depression, Anxiety, and Insomnia: A National Web-Based Survey on the General Population. *Iranian Journal of Psychiatry*. 2022;17(1):24-34.
55. Keskin DD, Keskin S, Bostan S. Mental disorders among pregnant women during the COVID-19 pandemic. A cross-sectional study. *Sao Paulo Medical Journal*. 2022;140(1):87-93.

- 1
- 2
- 3
- 4 56. Almugti HS, Alotaibi A, Almohammed A, Abuhadi R, Baeshen R, Alharthi Z, et al. Impact
- 5 of COVID-19 on Saudi Children: Special Focus on Behavioral, Social, and Emotional Aspects,
- 6 2020-2021. *Cureus*. 2021;13(11):e19856.
- 7 57. Al-Rahamneh H, Arafa L, Al Orani A, Baqleh R. Long-term psychological effects of
- 8 covid-19 pandemic on children in Jordan. *International Journal of Environmental Research and*
- 9 *Public Health*. 2021;18(15).
- 10 58. Mekkawy LH. Psychological, Nutritional and Behavioral Impact of COVID-19 Lockdown:
- 11 A Cross Sectional Study on Egyptian Children. *Psychiatry Investigation*. 2022;19(2):110-6.
- 12 59. Ranjbar K, Hosseinpour H, Shahriarirad R, Ghaem H, Jafari K, Rahimi T, et al. Students'
- 13 attitude and sleep pattern during school closure following COVID-19 pandemic quarantine: a
- 14 web-based survey in south of Iran. *Environmental Health and Preventive Medicine*. 2021;26(1).
- 15 60. Zengin M, Yayan EH, Vicnelioğlu E. The effects of the COVID-19 pandemic on children's
- 16 lifestyles and anxiety levels. *J Child Adolesc Psychiatr Nurs*. 2021;34(3):236-42.
- 17 61. Almhizai RA, Almogren SH, Altwijery NA, Alanazi BA, Al Dera NM, Alzahrani SS, et al.
- 18 Impact of COVID-19 on Children's and Adolescent's Mental Health in Saudi Arabia. *Cureus*.
- 19 2021;13(11):e19786.
- 20 62. Ghanamah R, Eghbaria-Ghanamah H. Impact of covid-19 pandemic on behavioral and
- 21 emotional aspects and daily routines of Arab israeli children. *International Journal of*
- 22 *Environmental Research and Public Health*. 2021;18(6):1-19.
- 23 63. Ustuner Top F, Cam HH. Sleep disturbances in school-aged children 6-12 years during
- 24 the COVID-19 pandemic in Turkey. *J Pediatr Nurs*. 2022;63:125-30.
- 25 64. Çetin FH, Uçar HN, Türkoğlu S, Kahraman EM, Kuz M, Güleç A. Chronotypes and
- 26 trauma reactions in children with ADHD in home confinement of COVID-19: full mediation effect
- 27 of sleep problems. *Chronobiol Int*. 2020;37(8):1214-22.
- 28 65. Dolev T, Zubedat S, Brand Z, Bloch B, Mader E, Blondheim O, et al. Physiological
- 29 parameters of mental health predict the emergence of post-traumatic stress symptoms in
- 30 physicians treating COVID-19 patients. *Transl Psychiatry*. 2021;11(1):169.
- 31 66. Elghazally NM, Abdeldaim D. Depression among medical staff during the coronavirus
- 32 disease-19 pandemic in Egypt: A comparative web-based cross-sectional study. *Open Access*
- 33 *Macedonian Journal of Medical Sciences*. 2021;9:1578-85.
- 34 67. Elgohary HM, Sehlo MG, Bassiony MM, Youssef UM, Elrafey DS, Amin SI. Depression
- 35 among health workers caring for patients with COVID-19 in Egypt. *Egyptian Journal of*
- 36 *Neurology, Psychiatry and Neurosurgery*. 2021;57(1).
- 37 68. Abdelghani M, Alsadik M, Abdelmoaty A, Atwa S, Said A, Hassan M. Sleep disturbances
- 38 following recovery from COVID-19: a comparative cross-sectional study in Egypt. *Eastern*
- 39 *Mediterranean Health Journal*. 2022;28(1):14-22.
- 40 69. Arafa A, Mohammed Z, Mahmoud O, Elshazley M, Ewis A. Depressed, anxious, and
- 41 stressed: What have healthcare workers on the frontlines in Egypt and Saudi Arabia
- 42 experienced during the COVID-19 pandemic? *Journal of Affective Disorders*. 2021;278:365-71.
- 43 70. Zarzour M, Hachem C, Kerbage H, Richa S, Choueifaty DE, Saliba G, et al. Anxiety and
- 44 sleep quality in a sample of Lebanese healthcare workers during the COVID-19 outbreak.
- 45 *Encephale*. 2021.
- 46 71. Duru H. The Continuing Effect of COVID-19 Pandemic on Physical Well-Being and
- 47 Mental Health of ICU Healthcare Workers in Turkey: A Single-Centre Cross-Sectional Later-
- 48 Phase Study. *Journal of Intensive Care Medicine*. 2021.
- 49 72. Jahrami H, BaHammam AS, AlGahtani H, Ebrahim A, Faris M, AlEid K, et al. The
- 50 examination of sleep quality for frontline healthcare workers during the outbreak of COVID-19.
- 51 *Sleep and Breathing*. 2021;25(1):503-11.
- 52 73. Meo SA, Alkhalifah JM, Alshammari NF, Alnufaie WS. Comparison of Generalized
- 53 Anxiety and Sleep Disturbance among Frontline and Second-Line Healthcare Workers during
- 54 the COVID-19 Pandemic. *Int J Environ Res Public Health*. 2021;18(11).
- 55
- 56
- 57
- 58
- 59
- 60

- 1  
2  
3 74. Yilmaz M, Kirac Y, Sahin MK. Sleep quality and related factors in a sample of Turkish  
4 healthcare workers during the COVID-19 pandemic: A cross-sectional study. *International*  
5 *Journal of Clinical Practice*. 2021;75(11).  
6 75. Elkholy H, Tawfik F, Ibrahim I, Salah El-Din W, Sabry M, Mohammed S, et al. Mental  
7 health of frontline healthcare workers exposed to COVID-19 in Egypt: A call for action. *The*  
8 *International journal of social psychiatry*. 2021;67(5):522-31.  
9 76. Bulut D, Sefa Sayar M, Koparal B, Cem Bulut E, Çelik S. Which of us were more  
10 affected by the pandemic? The psychiatric impacts of the COVID-19 pandemic on healthcare  
11 professionals in the province where the first quarantine units were established in Turkey.  
12 *International Journal of Clinical Practice*. 2021;75(7).  
13 77. Chan MF, Al-Shekaili M, Al-Adawi S, Hassan W, Al-Said N, Al-Sulaimani F, et al. Mental  
14 health outcomes among health-care workers in Oman during COVID-19: A cluster analysis. *Int J*  
15 *Nurs Pract*. 2021;27(6):e12998.  
16 78. Elsalem L, Al-Azzam N, Jum'ah AA, Obeidat N, Sindiani AM, Kheirallah KA. Stress and  
17 behavioral changes with remote E-exams during the Covid-19 pandemic: A cross-sectional  
18 study among undergraduates of medical sciences. *Annals of medicine and surgery* (2012).  
19 2020;60:271-9.  
20 79. Jalal SM, Beth MRM, Al-Hassan HJM, Alshealah NMJ. Body mass index, practice of  
21 physical activity and lifestyle of students during covid-19 lockdown. *Journal of Multidisciplinary*  
22 *Healthcare*. 2021;14:1901-10.  
23 80. Lan AN, Kotler D, Kronfeld-Schor N, Stukalin Y, Einat H. Changes in sleep patterns of  
24 college students in Israel during COVID-19 lockdown, a sleep diaries study. *Sleep and*  
25 *Biological Rhythms*.  
26 81. Meo SA, Alkhalifah JM, Alshammari NF, Alnufaie WS, Algoblan AF. Impact of COVID-19  
27 pandemic on sleep quality among medical and general science students: King Saud University  
28 Experience. *Pakistan Journal of Medical Sciences*. 2022;38(3):639-44.  
29 82. Alyoubi A, Halstead EJ, Zambelli Z, Dimitriou D. The impact of the covid-19 pandemic on  
30 students' mental health and sleep in Saudi Arabia. *International Journal of Environmental*  
31 *Research and Public Health*. 2021;18(17).  
32 83. Saadeh H, Saadeh M, Almobaideen W, Al Refaei A, Shewaikani N, Al Fayez RQ, et al.  
33 Effect of COVID-19 Quarantine on the Sleep Quality and the Depressive Symptom Levels of  
34 University Students in Jordan During the Spring of 2020. *Frontiers in Psychiatry*. 2021;12.  
35 84. Torun F, Torun SD. The psychological impact of the COVID-19 pandemic on medical  
36 students in Turkey. *Pakistan Journal of Medical Sciences*. 2020;36(6):1355-9.  
37 85. Goweda RA, Hassan-Hussein A, Alqahtani MA, Janaini MM, Alzahrani AH, Sindy BM, et  
38 al. Prevalence of sleep disorders among medical students of Umm Al-Qura University, Makkah,  
39 Kingdom of Saudi Arabia. *Journal of Public Health Research*. 2020;9(S1):45-9.  
40 86. Kheirallah K, Bloukh S, Khasawneh W, Alsulaiman J, Khassawneh A, Al-Mistarehi A-H,  
41 et al. Medical students' relative immunity, or lack thereof, against COVID-19 emotional distress  
42 and psychological challenges; a descriptive study from Jordan. *F1000Research*. 2021;10:297.  
43 87. Alkhotani A, Siddiqui MI, Almutashri F, Baothman R. The effect of COVID-19 pandemic  
44 on seizure control and self-reported stress on patient with epilepsy. *Epilepsy and Behavior*.  
45 2020;112.  
46 88. Alhurishi SA, Almutairi KM, Vinluan JM, Aboshaiqah AE, Marie MA. Mental Health  
47 Outcomes of Healthcare Providers During COVID-19 Pandemic in Saudi Arabia: A Cross-  
48 Sectional Study. *Front Public Health*. 2021;9:625523.  
49 89. Karatel M, Bulut ZI, Sari EO, Pelin Z, Yakut Y. The profile of musculoskeletal pain and its  
50 associations with sleep quality and depression during the COVID-19 in Turkey. *Korean Journal*  
51 *of Pain*. 2022;35(1):78-85.  
52  
53  
54  
55  
56  
57  
58  
59  
60

- 1  
2  
3 90. Güç ZG, Alacacioğlu A, Yazır MG, Kalender ME, Ünal S, Oflazoğlu U, et al. Being a  
4 Cancer Patient during the Time of COVID-19: Impact of the Pandemic on the Anxiety and the  
5 Sleeping Quality of Oncology Patients. *Chemotherapy*. 2022;67(1):29-36.
- 6 91. Çolak S, Gürlek B, Önal Ö, Yılmaz B, Hocaoglu C. The level of depression, anxiety, and  
7 sleep quality in pregnancy during coronavirus disease 2019 pandemic. *J Obstet Gynaecol Res*.  
8 2021;47(8):2666-76.
- 9 92. Yeni K, Tulek Z, Terzi M. A year with the fear of COVID-19 in multiple sclerosis patients:  
10 Examination of depression, sleep quality and quality of life before and after the pandemic. *Mult*  
11 *Scler Relat Disord*. 2022;57:103370.
- 12 93. Athamneh M, Sa'Di Q, Aldabbour B, Khader Y, Batayha W. Knowledge, attitudes, and  
13 impact of COVID-19 pandemic among neurology patients in Jordan: A cross-sectional study.  
14 *Journal of the Neurological Sciences*. 2021;429.
- 15 94. Seyahi E, Poyraz BC, Sut N, Akdogan S, Hamuryudan V. The psychological state and  
16 changes in the routine of the patients with rheumatic diseases during the coronavirus disease  
17 (COVID-19) outbreak in Turkey: a web-based cross-sectional survey. *Rheumatology*  
18 *International*. 2020;40(8):1229-38.
- 19 95. Younes S, Safwan J, Rahal M, Hammoudi D, Akiki Z, Akel M. Effect of COVID-19 on  
20 mental health among the young population in Lebanon. *Encephale*. 2021.
- 21 96. Alharbi AS, Alshahrani SM, Alsaadi MM, Al-Jahdali HH, Wali SO, BaHammam AS.  
22 Sleep quality and insomnia during the COVID-19 lockdown among the Saudi public A cross-  
23 sectional study. *Saudi Medical Journal*. 2021;42(4):384-90.
- 24 97. Duran S, Erkin Ö. Psychologic distress and sleep quality among adults in Turkey during  
25 the COVID-19 pandemic. *Progress in Neuro-Psychopharmacology and Biological Psychiatry*.  
26 2021;107.
- 27 98. Alqahtani SS, Banji D, Banji OJF. A survey assessing sleep efficiency among Saudis  
28 during COVID-19 home confinement using the Pittsburgh sleep quality index: A call for health  
29 education. *Saudi Pharmaceutical Journal*. 2021;29(7):692-8.
- 30 99. Cigiloglu A, Ozturk ZA, Efendioğlu EM. How do older adults react to coronavirus disease  
31 2019? *European Geriatric Medicine*. 2020;11(SUPPL 1):S101.
- 32 100. Aslan S, Dinç M. Examining the relationship between nurses' fear levels and insomnia  
33 during the COVID-19 pandemic in Turkey. *Perspect Psychiatr Care*. 2022;58(1):54-60.
- 34 101. Cakmak HSG. Early phase of COVID-19 quarantine impacted insomnia symptoms in  
35 Turkish families. *Sleep science (Sao Paulo, Brazil)*. 2022;15(Spec 1):195-202.
- 36 102. Al-Mutawa N, Al-Mutairi N. Impact of COVID-19 Pandemic and Lockdown Measures on  
37 the Mental Health of the General Population in the Gulf Cooperation Council States: A Cross-  
38 Sectional Study. *Frontiers in Psychiatry*. 2021;12.
- 39 103. Mousavi M, Ahmadi N, Seyedhosseini Ghaheh H, Vaezi A, Javanmard SH.  
40 Psychological impact of COVID-19 on health-care workers: A multicenter cross-sectional study.  
41 *J Res Med Sci*. 2021;26:77.
- 42 104. Barbato M, Thomas J. In this together: Psychological wellbeing of foreign workers in the  
43 United Arab Emirates during the COVID-19 pandemic. *Int J Psychol*. 2021;56(6):825-33.
- 44 105. Robillard R, Saad M, Edwards J, Solomonova E, Pennestri M-H, Daros A, et al. Social,  
45 financial and psychological stress during an emerging pandemic: observations from a  
46 population survey in the acute phase of COVID-19. *BMJ open*. 2020;10(12):e043805.
- 47 106. Leach CR, Rees-Punia E, Newton CC, Chantaprasopsuk S, Patel AV, Westmaas JL.  
48 Stressors and other pandemic-related predictors of prospective changes in psychological  
49 distress. *The Lancet Regional Health-Americas*. 2021;4:100069.
- 50 107. Aydin Sayilan A, Kulakaç N, Uzun S. Burnout levels and sleep quality of COVID-19  
51 heroes. *Perspect Psychiatr Care*. 2021;57(3):1231-6.
- 52  
53  
54  
55  
56  
57  
58  
59  
60

108. Alimoradi Z, Gozal D, Tsang HWH, Lin CY, Broström A, Ohayon MM, et al. Gender-specific estimates of sleep problems during the COVID-19 pandemic: Systematic review and meta-analysis. *J Sleep Res.* 2022;31(1):e13432.
109. Salari N, Khazaie H, Hosseini-Far A, Ghasemi H, Mohammadi M, Shohaimi S, et al. The prevalence of sleep disturbances among physicians and nurses facing the COVID-19 patients: a systematic review and meta-analysis. *Global Health.* 2020;16(1):92.
110. Redeker NS, Caruso CC, Hashmi SD, Mullington JM, Grandner M, Morgenthaler TI. Workplace interventions to promote sleep health and an alert, healthy workforce. *Journal of Clinical Sleep Medicine.* 2019;15(4):649-57.
111. Souza LFFd, Paineiras-Domingos LL, Melo-Oliveira MEdS, Pessanha-Freitas J, Moreira-Marconi E, Lacerda ACR, et al. The impact of COVID-19 pandemic in the quality of sleep by Pittsburgh Sleep Quality Index: A systematic review. *Ciência & Saúde Coletiva.* 2021;26:1457-66.
112. Camacho-Montaña LR, Iranzo A, Martínez-Piédrola RM, Camacho-Montaña LM, Huertas-Hoyas E, Serrada-Tejeda S, et al. Effects of COVID-19 home confinement on sleep in children: A systematic review. *Sleep medicine reviews.* 2022:101596.
113. Astell-Burt T, Feng X, Kolt GS. Does access to neighbourhood green space promote a healthy duration of sleep? Novel findings from a cross-sectional study of 259 319 Australians. *BMJ open.* 2013;3(8):e003094.
114. Johnson BS, Malecki KM, Peppard PE, Beyer KM. Exposure to neighborhood green space and sleep: evidence from the Survey of the Health of Wisconsin. *Sleep Health.* 2018;4(5):413-9.
115. DeSantis AS, Diez Roux AV, Moore K, Baron KG, Mujahid MS, Nieto FJ. Associations of neighborhood characteristics with sleep timing and quality: the Multi-Ethnic Study of Atherosclerosis. *Sleep.* 2013;36(10):1543-51.
116. Johnson DA, Lisabeth L, Hickson D, Johnson-Lawrence V, Samdarshi T, Taylor H, et al. The social patterning of sleep in African Americans: associations of socioeconomic position and neighborhood characteristics with sleep in the Jackson Heart Study. *Sleep.* 2016;39(9):1749-59.
117. Troxel WM, DeSantis A, Richardson AS, Beckman R, Ghosh-Dastidar B, Nugroho A, et al. Neighborhood disadvantage is associated with actigraphy-assessed sleep continuity and short sleep duration. *Sleep.* 2018;41(10):zsy140.
118. Hill TD, Trinh HN, Wen M, Hale L. Perceived neighborhood safety and sleep quality: a global analysis of six countries. *Sleep medicine.* 2016;18:56-60.
119. Billings ME, Gold D, Szpiro A, Aaron CP, Jorgensen N, Gassett A, et al. The association of ambient air pollution with sleep apnea: the multi-ethnic study of atherosclerosis. *Annals of the American Thoracic Society.* 2019;16(3):363-70.
120. Shen Y-L, Liu W-T, Lee K-Y, Chuang H-C, Chen H-W, Chuang K-J. Association of PM<sub>2.5</sub> with sleep-disordered breathing from a population-based study in Northern Taiwan urban areas. *Environmental Pollution.* 2018;233:109-13.
121. Lappharat S, Taneepanichskul N, Reutrakul S, Chirakalwasan N. Effects of bedroom environmental conditions on the severity of obstructive sleep apnea. *Journal of Clinical Sleep Medicine.* 2018;14(4):565-73.
122. Gislason T, Bertelsen RJ, Real FG, Sigsgaard T, Franklin KA, Lindberg E, et al. Self-reported exposure to traffic pollution in relation to daytime sleepiness and habitual snoring: a questionnaire study in seven North-European cities. *Sleep Medicine.* 2016;24:93-9.
123. Castañeda JL, Kheirandish-Gozal L, Gozal D, Accinelli RA, Group PCIdIdIAR. Effect of reductions in biomass fuel exposure on symptoms of sleep apnea in children living in the peruvian andes: a preliminary field study. *Pediatric pulmonology.* 2013;48(10):996-9.
124. Halperin D. Environmental noise and sleep disturbances: A threat to health? *Sleep science.* 2014;7(4):209-12.

- 1  
2  
3 125. Germain A. Sleep disturbances as the hallmark of PTSD: where are we now? *American*  
4 *Journal of Psychiatry*. 2013;170(4):372-82.  
5 126. Galovski TE, Monson C, Bruce SE, Resick PA. Does cognitive-behavioral therapy for  
6 PTSD improve perceived health and sleep impairment? *Journal of Traumatic Stress: Official*  
7 *Publication of The International Society for Traumatic Stress Studies*. 2009;22(3):197-204.  
8 127. Bergen N, Labonté R. "Everything is perfect, and we have no problems": detecting and  
9 limiting social desirability bias in qualitative research. *Qualitative health research*.  
10 2020;30(5):783-92.  
11 128. Larson RB. Controlling social desirability bias. *International Journal of Market Research*.  
12 2019;61(5):534-47.  
13 129. Sedgwick P. What is recall bias? *BMJ*. 2012;344.  
14  
15  
16  
17  
18  
19  
20  
21  
22  
23  
24  
25  
26  
27  
28  
29  
30  
31  
32  
33  
34  
35  
36  
37  
38  
39  
40  
41  
42  
43  
44  
45  
46  
47  
48  
49  
50  
51  
52  
53  
54  
55  
56  
57  
58  
59  
60

**Fig. 1.** Preferred Reporting Items for Systematic Reviews and Meta-Analyses (PRISMA) study selection flow diagram outlining the literature review process when searching for articles on PubMed and Web of Science.



Table S1. Search keywords and MeSH terms developed for the literature search

**Journal Databases Keyword Strategy**

## Search Keywords

**1) Generic Exposure of Interest – COVID-19**

('coronavirus disease 2019' OR '2019 novel coronavirus disease' OR '2019 novel coronavirus epidemic' OR '2019 novel coronavirus infection' OR '2019-ncov disease' OR '2019-ncov infection' OR 'covid' OR 'covid 19' OR 'covid 19 induced pneumonia' OR 'covid 2019' OR 'covid-10' OR 'covid-19' OR 'covid-19 induced pneumonia' OR 'covid-19 pneumonia' OR 'covid19' OR 'sars coronavirus 2 infection' OR 'sars coronavirus 2 pneumonia' OR 'sars-cov-2 disease' OR 'sars-cov-2 infection' OR 'sars-cov-2 pneumonia' OR 'sars-cov2 disease' OR 'sars-cov2 infection' OR 'sarscov2 disease' OR 'sarscov2 infection' OR 'wuhan coronavirus disease' OR 'wuhan coronavirus infection' OR 'coronavirus disease 2' OR 'coronavirus disease 2010' OR 'coronavirus disease 2019' OR 'coronavirus disease 2019 pneumonia' OR 'coronavirus disease-19' OR 'coronavirus infection 2019' OR 'ncov 2019 disease' OR 'ncov 2019 infection' OR 'new coronavirus pneumonia' OR 'novel coronavirus 2019 disease' OR 'novel coronavirus 2019 infection' OR 'novel coronavirus disease 2019' OR 'novel coronavirus infected pneumonia' OR 'novel coronavirus infection 2019' OR 'novel coronavirus pneumonia' OR 'paucisymptomatic coronavirus disease 2019' OR 'severe acute respiratory syndrome 2' OR 'severe acute respiratory syndrome 2 pneumonia' OR 'severe acute respiratory syndrome cov-2 infection' OR 'severe acute respiratory syndrome coronavirus 2 infection' OR 'severe acute respiratory syndrome coronavirus 2019 infection')

AND

**2) Outcome of Interest - sleep health**

('sleep' OR 'sleep' OR 'sleeping' OR 'sleep disorder' OR 'chronobiology disorders' OR 'disturbances of sleep' OR 'dyssomnia' OR 'dyssomnias' OR 'intrinsic sleep disorders' OR 'sleep disorder' OR 'sleep disorders' OR 'sleep disorders, intrinsic' OR 'sleep disturbance' OR 'sleep perturbation' OR 'sleep wake disorder' OR 'sleep wake disorders' OR 'sleep disordered breathing' OR 'apnea, sleep' OR 'apnoea, sleep' OR 'nocturnal apnea' OR 'nocturnal apnoea' OR 'obstructive sleep apnea' OR 'obstructive sleep apnea hypopnea syndrome' OR 'obstructive sleep apnea syndrome' OR 'obstructive sleep apnoea' OR 'obstructive sleep apnoea hypopnoea syndrome' OR 'obstructive sleep apnoea syndrome' OR 'obstructive sleep-disordered breathing' OR 'sleep apnea' OR 'sleep apnea syndrome' OR 'sleep apnea syndromes' OR 'sleep apnea, obstructive' OR 'sleep apnoea' OR 'sleep apnoea syndrome' OR 'sleep apnoea syndromes' OR 'sleep apnoea, obstructive' OR 'sleep disordered breathing')

AND

**3) Population of Interest - Middle Eastern populations**

('middle east' OR 'middle east' OR 'bahrain' OR 'cyprus' OR 'iraq' OR 'kuwait' OR 'saudi' OR 'saudi arabia' OR 'oman' OR 'omani' OR 'jordan' OR 'jordanian' OR 'bahraini' OR 'cypriot' OR 'lebanese' OR 'lebanon' OR 'kuwaiti' OR 'iran' OR 'iranian (citizen)' OR 'israel' OR 'israeli' OR 'gaza strip palestine' OR 'gaza strip' OR 'palestine' OR 'syrian' OR 'syrian arab republic' OR 'egypt' OR 'egyptian' OR 'yemen' OR 'yemeni' OR 'united arab emirates' OR 'emirati' OR 'turkey (republic)' OR 'turkish' OR 'eastern mediterranean region' OR 'qatar' OR 'qatari' OR 'algeria' OR 'algerian' OR 'tunisia' OR 'tunisian' OR 'morroco' OR 'morrocon' OR 'libya' OR 'libyan')



Table S2. List of countries considered in MENA definition in this study.

| Country              |
|----------------------|
| Algeria              |
| Bahrain              |
| Egypt                |
| Iran                 |
| Iraq                 |
| Israel               |
| Jordan               |
| Kuwait               |
| Lebanon              |
| Libya                |
| Morocco              |
| Oman                 |
| Qatar                |
| Saudi Arabia         |
| Syria                |
| Tunisia              |
| United Arab Emirates |
| Yemen                |

Table S3. Newcastle-Ottawa Scale for Bias Assessment

| Study                    | Total Score | Selection                        |             |                 | Comparability              | Outcome                      |                       |
|--------------------------|-------------|----------------------------------|-------------|-----------------|----------------------------|------------------------------|-----------------------|
|                          |             | Representativeness of the sample | Sample size | Non-respondents | Ascertainments of exposure | Based on design and analysis | Assessment of Outcome |
| Özenoğlu et al., 2021    | 6           | *                                | *           |                 | *                          | *                            | *                     |
| Çolak et al., 2021       | 8           | *                                | *           |                 | **                         | *                            | **                    |
| Abbas et al., 2021       | 6           | *                                | *           |                 | *                          | *                            | *                     |
| Abdelghani et al., 2021  | 7           | *                                | *           |                 | **                         | *                            | *                     |
| Abdoli et al., 2021      | 9           | *                                | *           | *               | **                         | **                           | *                     |
| Alah et al., 2022        | 8           | *                                | *           | *               | **                         | *                            | *                     |
| Abouzid et al., 2021     | 8           | *                                | *           | *               | **                         | *                            | *                     |
| Abu-Elnenin et al., 2021 | 9           | *                                | *           | *               | **                         | **                           | *                     |
| Ahorsu et al., 2020      | 8           | *                                | *           | *               | *                          | *                            | **                    |
| Akbari et al., 2021      | 7           | *                                | *           |                 | **                         | *                            | *                     |
| Akbarpour et al., 2022   | 6           | *                                | *           |                 | *                          | *                            | *                     |
| Al Ammari et al., 2021   | 9           | *                                | *           | *               | **                         | **                           | *                     |
| Al Maqbali et al., 2021  | 10          | *                                | *           | *               | **                         | **                           | **                    |
| Al Miskry et al., 2021   | 9           | *                                | *           | *               | **                         | **                           | *                     |

1  
2  
3  
4  
5  
6  
7  
8  
9  
10  
11  
12  
13  
14  
15  
16  
17  
18  
19  
20  
21  
22  
23  
24  
25  
26  
27  
28  
29  
30  
31  
32  
33  
34  
35  
36  
37  
38  
39  
40  
41  
42  
43  
44  
45  
46  
47

|                          |   |   |   |   |    |    |    |   |
|--------------------------|---|---|---|---|----|----|----|---|
| Al Mukhaini et al., 2021 | 7 | * | * |   | ** | *  | *  | * |
| Al Ajlouni et al., 2022  | 8 | * | * | * | ** | *  | *  | * |
| Al Ajlouni et al., 2020  | 8 | * | * | * | ** | *  | *  | * |
| Al Musharaf et al., 2020 | 9 | * | * | * | ** | ** | *  | * |
| Al Mutawa et al., 2021   | 9 | * | * | * | ** | ** | *  | * |
| Al Rahamneh et al., 2021 | 6 | * | * |   | *  | *  | *  | * |
| Al Saleh et al., 2021    | 7 | * | * | * | *  | *  | *  | * |
| Al Anazi et al., 2022    | 6 | * | * |   | *  | *  | *  | * |
| Alboghdady et al., 2022  | 6 | * |   |   | ** | *  | *  | * |
| Alfawaz et al., 2021     | 6 | * | * |   | *  | *  | *  | * |
| Alghamdi et al., 2022    | 6 | * |   |   | ** | *  | *  | * |
| AlGhuffli et al., 2021   | 6 | * |   |   | ** | *  | *  | * |
| AlHadi et al., 2021      | 8 | * | * | * | ** | *  | *  | * |
| Alharbi et al., 2021     | 8 | * | * | * | ** | *  | *  | * |
| Alkhotani et al., 2020   | 8 |   | * |   | ** | ** | ** | * |
| Alhurishi et al., 2021   | 5 |   |   |   | ** | *  | *  | * |
| Ali et al., 2022         | 6 | * |   | * | *  | *  | *  | * |

For peer review only

|    |                         |   |   |   |   |    |    |    |
|----|-------------------------|---|---|---|---|----|----|----|
| 1  |                         |   |   |   |   |    |    |    |
| 2  |                         |   |   |   |   |    |    |    |
| 3  |                         |   |   |   |   |    |    |    |
| 4  | Ali et al., 2021        | 6 | * |   |   | ** | *  | *  |
| 5  |                         |   |   |   |   |    |    |    |
| 6  | Aljemaiah et al., 2021  | 6 | * |   |   | ** | *  | *  |
| 7  |                         |   |   |   |   |    |    |    |
| 8  | Aljuffali et al., 2022  | 9 | * | * | * | ** | ** | *  |
| 9  |                         |   |   |   |   |    |    |    |
| 10 | Almhdawi et al., 2022   | 7 | * | * |   | ** | *  | *  |
| 11 |                         |   |   |   |   |    |    |    |
| 12 | Almhizai et al., 2021   | 5 | * |   |   | *  | *  | *  |
| 13 |                         |   |   |   |   |    |    |    |
| 14 | Almugti et al., 2021    | 7 | * | * |   | ** | *  | *  |
| 15 |                         |   |   |   |   |    |    |    |
| 16 | Alnofaiey et al., 2020  | 7 | * | * |   | ** | *  | *  |
| 17 |                         |   |   |   |   |    |    |    |
| 18 | Alomari et al., 2021    | 6 | * | * |   | *  | *  | *  |
| 19 |                         |   |   |   |   |    |    |    |
| 20 | Allothman et al., 2021  | 9 | * | * | * | ** | ** | *  |
| 21 |                         |   |   |   |   |    |    |    |
| 22 | Alqahtani et al., 2021  | 8 | * | * | * | ** | *  | *  |
| 23 |                         |   |   |   |   |    |    |    |
| 24 | Alrashed et al., 2021   | 5 |   |   |   | ** | *  | *  |
| 25 |                         |   |   |   |   |    |    |    |
| 26 | AlRasheed et al., 2022  | 8 | * | * | * | ** | *  | *  |
| 27 |                         |   |   |   |   |    |    |    |
| 28 | Alshammari et al., 2021 | 4 |   |   | * | *  | *  | *  |
| 29 |                         |   |   |   |   |    |    |    |
| 30 | Alshekaili et al., 2020 | 7 | * | * |   | ** | *  | *  |
| 31 |                         |   |   |   |   |    |    |    |
| 32 | Alshumrani et al., 2022 | 8 | * | * |   | ** | *  | ** |
| 33 |                         |   |   |   |   |    |    |    |
| 34 | Alsulimani et al., 2021 | 6 | * | * |   | *  | *  | *  |
| 35 |                         |   |   |   |   |    |    |    |
| 36 | Araç et al., 2020       | 7 | * |   |   | ** | ** | *  |
| 37 |                         |   |   |   |   |    |    |    |
| 38 |                         |   |   |   |   |    |    |    |
| 39 |                         |   |   |   |   |    |    |    |
| 40 |                         |   |   |   |   |    |    |    |
| 41 |                         |   |   |   |   |    |    |    |
| 42 |                         |   |   |   |   |    |    |    |
| 43 |                         |   |   |   |   |    |    |    |
| 44 |                         |   |   |   |   |    |    |    |
| 45 |                         |   |   |   |   |    |    |    |
| 46 |                         |   |   |   |   |    |    |    |
| 47 |                         |   |   |   |   |    |    |    |

1  
2  
3  
4  
5  
6  
7  
8  
9  
10  
11  
12  
13  
14  
15  
16  
17  
18  
19  
20  
21  
22  
23  
24  
25  
26  
27  
28  
29  
30  
31  
32  
33  
34  
35  
36  
37  
38  
39  
40  
41  
42  
43  
44  
45  
46  
47

|                            |   |   |   |    |    |    |   |
|----------------------------|---|---|---|----|----|----|---|
| Arafa et al., 2020         | 7 | * | * | ** | *  | *  | * |
| Arafa et al., 2021         | 7 | * |   | ** | ** | *  | * |
| Aslan et al., 2021         | 7 | * | * | ** | *  | *  | * |
| Athamneh et al., 2021      | 6 | * |   | *  | *  | ** | * |
| Aydin Sayilan et al., 2021 | 7 | * | * | ** | *  | *  | * |
| Şentürk et al., 2021       | 6 | * |   | ** | *  | *  | * |
| Büber et al., 2022         | 6 | * |   | ** | *  | *  | * |
| Badahdah et al., 2020      | 5 | * |   | ** | *  | *  | * |
| Badri et al., 2021         | 7 | * | * | *  | *  | *  | * |
| Bar-zeev et al., 2022      | 6 | * | * | *  | *  | *  | * |
| Barbato et al., 2021       | 6 | * |   | ** | *  | *  | * |
| Bilgiç et al., 2021        | 6 | * |   | ** | *  | *  | * |
| Bağcı et al., 2021         | 8 | * | * | *  | ** | *  | * |
| Bucak et al., 2021         | 6 | * |   | ** | *  | *  | * |
| Bulut et al., 2021         | 7 | * | * | ** | *  | *  | * |
| Cahal et al., 2021         | 5 | * |   | *  | *  | *  | * |
| Cakmak et al., 2022        | 6 |   | * | ** | *  | *  | * |

For peer review only

1  
2  
3  
4  
5  
6  
7  
8  
9  
10  
11  
12  
13  
14  
15  
16  
17  
18  
19  
20  
21  
22  
23  
24  
25  
26  
27  
28  
29  
30  
31  
32  
33  
34  
35  
36  
37  
38  
39  
40  
41  
42  
43  
44  
45  
46  
47

|                            |   |   |   |   |    |   |    |   |
|----------------------------|---|---|---|---|----|---|----|---|
| Chan et al., 2021          | 8 | * | * | * | ** | * | *  | * |
| Cheikh Ismail et al., 2021 | 6 | * |   |   | ** | * | *  | * |
| Cheikh Ismail et al., 2020 | 6 | * |   |   | ** | * | *  | * |
| Cigiloglu et al., 2020     | 6 | * |   |   | ** | * | *  | * |
| Coiro et al., 2021         | 6 | * |   |   | ** | * | *  | * |
| Duran et al., 2021         | 7 | * | * |   | ** | * | *  | * |
| Durmaz Engin et al., 2021  | 7 | * | * |   | ** | * | *  | * |
| El Refay et al., 2021      | 6 | * |   |   | ** | * | *  | * |
| Elghazally et al., 2021    | 6 | * |   |   | ** | * | *  | * |
| Elgohary et al., 2021      | 6 |   | * |   | ** | * | *  | * |
| Elkholy et al., 2021       | 7 | * | * |   | ** | * | *  | * |
| Ellakani et al., 2022      | 5 | * |   |   | *  | * | *  | * |
| Elsalem et al., 2020       | 5 |   | * |   | *  | * | *  | * |
| Eren et al., 2021          | 7 | * | * |   | ** | * | *  | * |
| Gol et al., 2021           | 7 | * | * |   | ** | * | *  | * |
| Guc et al., 2022           | 8 | * |   | * | ** | * | ** | * |
| Galali et al., 2021        | 5 | * |   |   | *  | * | *  | * |

For peer review only

1  
2  
3  
4  
5  
6  
7  
8  
9  
10  
11  
12  
13  
14  
15  
16  
17  
18  
19  
20  
21  
22  
23  
24  
25  
26  
27  
28  
29  
30  
31  
32  
33  
34  
35  
36  
37  
38  
39  
40  
41  
42  
43  
44  
45  
46  
47

|                             |   |   |   |    |    |   |   |
|-----------------------------|---|---|---|----|----|---|---|
| Ghanamah et al., 2021       | 5 | * |   | *  | *  | * | * |
| Gokseven et al., 2021       | 6 | * |   | ** | *  | * | * |
| Goweda et al., 2021         | 5 |   |   | ** | *  | * | * |
| Grande et al., 2021         | 7 |   | * | ** | ** | * | * |
| Hadar-Shoval et al., 2021   | 7 | * | * | ** | *  | * | * |
| Hammoudi et al., 2021       | 6 | * |   | ** | *  | * | * |
| Hammouri et al., 2022       | 5 | * |   | *  | *  | * | * |
| Hawari et al., 2021         | 6 | * |   | ** | *  | * | * |
| Husain et al., 2021         | 6 | * | * | *  | *  | * | * |
| Hussien et al., 2020        | 7 | * | * | ** | *  | * | * |
| Iqbal et al., 2021          | 7 | * | * | ** | *  | * | * |
| Jahrami et al., 2021        | 7 | * |   | ** | ** | * | * |
| Jalal et al., 2021          | 8 | * | * | ** | ** | * | * |
| Kamaleddine et al., 2022    | 5 |   |   | ** | *  | * | * |
| Kandemir et al., 2021       | 6 | * |   | ** | *  | * | * |
| Karabulut et al., 2021      | 5 |   |   | ** | *  | * | * |
| Karahan Yilmaz et al., 2021 | 5 | * |   | *  | *  | * | * |

For peer review only

1  
2  
3  
4  
5  
6  
7  
8  
9  
10  
11  
12  
13  
14  
15  
16  
17  
18  
19  
20  
21  
22  
23  
24  
25  
26  
27  
28  
29  
30  
31  
32  
33  
34  
35  
36  
37  
38  
39  
40  
41  
42  
43  
44  
45  
46  
47

|                          |   |   |   |    |   |   |   |
|--------------------------|---|---|---|----|---|---|---|
| Karatel et al., 2022     | 6 | * |   | ** | * | * | * |
| Keskin et al., 2022      | 5 |   |   | ** | * | * | * |
| Khamis et al., 2020      | 6 | * |   | ** | * | * | * |
| Kheirallah et al., 2021  | 6 | * | * | *  | * | * | * |
| Kilani et al., 2020      | 6 | * |   | ** | * | * | * |
| Kolokotorni et al., 2021 | 6 | * |   | ** | * | * | * |
| Korkmaz et al., 2020     | 5 |   |   | ** | * | * | * |
| Lin et al., 2022         | 7 | * | * | ** | * | * | * |
| Lin et al., 2020         | 5 | * |   | *  | * | * | * |
| Maatouk et al., 2022     | 6 | * |   | ** | * | * | * |
| Mahamid et al., 2021     | 6 | * |   | ** | * | * | * |
| Masoumi et al., 2021     | 5 |   |   | ** | * | * | * |
| Mekkawy et al., 2022     | 6 | * |   | ** | * | * | * |
| Meo et al., 2022         | 7 | * | * | ** | * | * | * |
| Mosheva et al., 2020     | 6 | * |   | ** | * | * | * |
| Mousavi et al., 2021     | 7 | * | * | ** | * | * | * |
| Najafipour et al., 2021  | 6 | * |   | ** | * | * | * |

For peer review only



1  
2  
3  
4  
5  
6  
7  
8  
9  
10  
11  
12  
13  
14  
15  
16  
17  
18  
19  
20  
21  
22  
23  
24  
25  
26  
27  
28  
29  
30  
31  
32  
33  
34  
35  
36  
37  
38  
39  
40  
41  
42  
43  
44  
45  
46  
47

|                                   |   |   |   |   |    |    |   |   |
|-----------------------------------|---|---|---|---|----|----|---|---|
| Nakhostin-Ansaeri et al., 2021    | 6 | * |   |   | ** | *  | * | * |
| Nakhostin-Ansari et al., 2020     | 5 | * |   |   | *  | *  | * | * |
| Nashwan et al., 2021              | 5 |   |   |   | ** | *  | * | * |
| Okudan et al., 2021               | 6 | * |   |   | ** | *  | * | * |
| Oteir et al., 2022                | 8 | * | * | * | ** | *  | * | * |
| Radwan et al., 2021               | 6 | * |   | * | *  | *  | * | * |
| Ranjbar et al., 2021              | 6 | * | * |   | *  | *  | * | * |
| Romdhani et al., 2021             | 7 | * | * |   | ** | *  | * | * |
| Saadeh et al., 2021               | 7 | * |   |   | ** | ** | * | * |
| Sadeghniaat-Haghighi et al., 2021 | 6 | * |   |   | ** | *  | * | * |
| Salehinejad et al., 2020          | 6 | * |   |   | ** | *  | * | * |
| Salman et al., 2021               | 6 | * |   |   | ** | *  | * | * |
| Salman et al., 2021               | 6 | * |   |   | ** | *  | * | * |
| San et al., 2021                  | 5 |   |   |   | ** | *  | * | * |
| Sarsak 2022                       | 6 | * |   |   | ** | *  | * | * |
| Seyahi et al., 2020               | 7 | * |   | * | ** | *  | * | * |
| Sis Celik et al., 2021            | 5 | * |   |   | *  | *  | * | * |

For peer review only

1  
2  
3  
4  
5  
6  
7  
8  
9  
10  
11  
12  
13  
14  
15  
16  
17  
18  
19  
20  
21  
22  
23  
24  
25  
26  
27  
28  
29  
30  
31  
32  
33  
34  
35  
36  
37  
38  
39  
40  
41  
42  
43  
44  
45  
46  
47

|                                 |   |   |   |   |    |    |    |   |
|---------------------------------|---|---|---|---|----|----|----|---|
| Sultan et al., 2021             | 6 | * | * |   | *  | *  | *  | * |
| Tas et al., 2021                | 5 |   | * |   | *  | *  | *  | * |
| Tasdemir Yigitoglu et al., 2021 | 7 | * | * |   | ** | *  | *  | * |
| Toprak Celenay et al., 2020     | 6 | * |   |   | ** | *  | *  | * |
| Torkian et al., 2021            | 6 | * |   |   | ** | *  | *  | * |
| Torun et al., 2021              | 6 |   |   | * | ** | *  | *  | * |
| Ustuner Top et al., 2022        | 6 | * |   |   | ** | *  | *  | * |
| Yilmaz et al., 2021             | 6 | * |   |   | ** | *  | *  | * |
| Yalcin et al., 2022             | 8 | * | * | * | ** | *  | *  | * |
| Yeni et al., 2022               | 6 |   |   |   | ** | *  | ** | * |
| Yilmaz et al., 2021             | 8 | * | * | * | ** | *  | *  | * |
| Yilmaz et al., 2021             | 6 | * |   |   | ** | *  | *  | * |
| Younes et al., 2021             | 7 | * | * |   | ** | *  | *  | * |
| Youssef et al., 2020            | 7 | * |   |   | ** | ** | *  | * |
| Yurumez Korkmaz et al., 2021    | 6 |   |   |   | ** | ** | *  | * |
| Zach et al., 2021               | 7 | * | * |   | ** | *  | *  | * |
| Zarzour et al., 2021            | 6 | * |   |   | ** | *  | *  | * |

For peer review only

1  
2  
3  
4  
5  
6  
7  
8  
9  
10  
11  
12  
13  
14  
15  
16  
17  
18  
19  
20  
21  
22  
23  
24  
25  
26  
27  
28  
29  
30  
31  
32  
33  
34  
35  
36  
37  
38  
39  
40  
41  
42  
43  
44  
45  
46  
47

|                     |   |   |   |    |   |   |   |
|---------------------|---|---|---|----|---|---|---|
| Zengin et al., 2021 | 7 | * | * | ** | * | * | * |
| Zreik et al., 2021  | 6 | * |   | ** | * | * | * |

For peer review only

Table S4. Results of full literature review, tabulated by sub-population

| Adults               |                                                                                                                |                                                                                                                                                                 |             |                       |                                                                                     |                           |                                                                                                                                                                                                                                                                                                                                                                                                                                                |
|----------------------|----------------------------------------------------------------------------------------------------------------|-----------------------------------------------------------------------------------------------------------------------------------------------------------------|-------------|-----------------------|-------------------------------------------------------------------------------------|---------------------------|------------------------------------------------------------------------------------------------------------------------------------------------------------------------------------------------------------------------------------------------------------------------------------------------------------------------------------------------------------------------------------------------------------------------------------------------|
| Reference            | Location of Study                                                                                              | Population                                                                                                                                                      | Sample Size | Study Design          | Sleep Health Measurement Tool                                                       | Sleep Health Domains      | Main Findings                                                                                                                                                                                                                                                                                                                                                                                                                                  |
| Abouzid et al., 2021 | Egypt, Jordan, United Arab Emirates, Kuwait, Bahrain, Saudi Arabia, Oman, Qatar, Yemen, Syria, Palestine. Iraq | 5896 respondents were included. The participants were aged between 8–23 years (45%; 24–30, 20.5%; 31–40, 18.6%; 41–60, 13.6%; >40, 2.3%) and 62.8% were females | 5896        | Cross-sectional study | Survey items developed by the study's author including questions on sleep duration. | Sleep duration            | 49.6% reported they were sleeping less than 7 h and the sleeping hours increased to 7–10 h. for 53.2%                                                                                                                                                                                                                                                                                                                                          |
| Ahorsu et al., 2020  | Qazvin, Iran                                                                                                   | older adults (50 or older) with a mean age of 57.72 (SD = 7.31) 62% male                                                                                        | 413         | Cross-sectional study | Insomnia Severity Index (ISI)                                                       | Sleep disorder (insomnia) | fear of COVID-19 was a significant mediator (unstandardized coefficient = 0.360; LLCI = 0.112; ULCI = 0.664) in the association between perceived health status and insomnia, significant direct effects of perceived health status on fear of COVID-19 and insomnia (unstandardized coefficient of 1.621; SE = 0.378; p < .001) as well as a significant total effect on insomnia (unstandardized coefficient of 1.981; SE = 0.392; p < .001) |
| Akbari et al., 2021  | Iran                                                                                                           | adults (mean age 30±11 years, 54.3% female)                                                                                                                     | 3,323       | Cross-sectional       | Pittsburgh Sleep Quality Index (PSQI)                                               | Sleep quality             | Inactive participants (IPs) scored significantly lower (p < 0.001) on the global score of sleep-quality than active participants (APs) (mean ± SD, 6.04±2.95, 5.59±2.94, respectively). No significant differences in inactive subgroups. Significant differences in active subgroups (p=0.003) APs that maintained                                                                                                                            |

|                         |                      |                                                                                                                                                                                                                                                          |       |                       |                                                                                            |                                             |                                                                                                                                                                                                                                                                                                                                                                                                                                                                                                                                                                                                                                                     |
|-------------------------|----------------------|----------------------------------------------------------------------------------------------------------------------------------------------------------------------------------------------------------------------------------------------------------|-------|-----------------------|--------------------------------------------------------------------------------------------|---------------------------------------------|-----------------------------------------------------------------------------------------------------------------------------------------------------------------------------------------------------------------------------------------------------------------------------------------------------------------------------------------------------------------------------------------------------------------------------------------------------------------------------------------------------------------------------------------------------------------------------------------------------------------------------------------------------|
|                         |                      |                                                                                                                                                                                                                                                          |       |                       |                                                                                            |                                             | their activity levels had better sleep quality. Sleep quality after COVID-19: Sleep habits of 49.3% of individuals (APs= 49.5% and IPs= 49.1%) had changed, so that 39.8% of them slept later; sleep time of 44.6% of individuals (APs= 43.7% and IPs= 45.5%) had changed, so that 28.7% of them slept more; and a significant portion of them (APs= 36.7% and IPs= 42.2%) were dissatisfied with their sleep habit changes                                                                                                                                                                                                                         |
| Akbarpour et al., 2022  | Iran                 | 1223 individuals with a mean age of 39.82 ± 10.75 years participated in the study.                                                                                                                                                                       | 1223  | Cross-sectional study | Insomnia Severity Index                                                                    | Sleep problems (insomnia)                   | Prevalence of insomnia 55.2%<br>Being married was associated with less risk for insomnia (OR= 0.69, CI-95%= 0.52-0.91).                                                                                                                                                                                                                                                                                                                                                                                                                                                                                                                             |
| Al Miskry et al., 2021  | United Arab Emirates | 737 participants: 60.7% (n = 447) university students, 27.4% (n = 202) faculty members, and 11.9% (n = 88) staff selected through the convenience sampling method. 72.6% (n = 535) of the participants were females, whereas 27.4% (n = 202) were males. | 737   | Cross-sectional study | Survey items developed by the study's author including questions on sleeping difficulties. | Sleep problems (sleep pattern disturbances) | 19.5% experienced changes in sleep patterns                                                                                                                                                                                                                                                                                                                                                                                                                                                                                                                                                                                                         |
| Al-Ajlouni et al., 2020 | Jordan               | mean age 37.35 (SD=11.01), with over 60% aged <40 years<br>52.9% male                                                                                                                                                                                    | 1,240 | Cross-sectional study | Pittsburgh Sleep Quality Index (PSQI)                                                      | Sleep quality                               | over 60% of participants reported having experienced at least one sleep problem in the last week, and nearly half reported having had short sleep duration. Participants reporting mild anxiety were more likely to experience poor sleep quality (aPR = 3.01; 95% CI=2.07 to 4.35), short sleep duration (aPR = 1.35; 95% CI=1.17 to 1.56) and at least one sleep problem (aPR=1.41; 95% CI=1.27 to 1.56). Those reporting moderate anxiety were more likely to experience poor sleep quality (aPR=5.78; 95% CI=3.97 to 8.43), short sleep duration (aPR=1.73; 95% CI=1.47 to 2.04) and at least one sleep problem (aPR=1.56; 95% CI=1.39 to 1.75) |

|                          |                                                                      |                                                                                                                                                                                                           |       |                       |                                       |                                 |                                                                                                                                                                                                                                                                                                                                                                                                                                                                                                                                                                                                                          |
|--------------------------|----------------------------------------------------------------------|-----------------------------------------------------------------------------------------------------------------------------------------------------------------------------------------------------------|-------|-----------------------|---------------------------------------|---------------------------------|--------------------------------------------------------------------------------------------------------------------------------------------------------------------------------------------------------------------------------------------------------------------------------------------------------------------------------------------------------------------------------------------------------------------------------------------------------------------------------------------------------------------------------------------------------------------------------------------------------------------------|
|                          |                                                                      |                                                                                                                                                                                                           |       |                       |                                       |                                 | compared with those reporting minimal anxiety. Corresponding to the dose–response relationship between anxiety and sleep health outcomes, those reporting severe anxiety were the most likely to experience poor sleep quality (aPR = 8.954; 95% CI = 6.12 to 13.08), short sleep duration (aPR = 2.23; 95% CI=1.91 to 2.61) and at least one sleep problem (aPR=1.73; 95% CI=1.54 to 1.95) P-trend <0.001 for all sleep outcomes                                                                                                                                                                                        |
| Al-Ajlouni et al., 2022  | Jordan                                                               | 60% less than 40 years old, mean age of 37.4 (SD = 11.0) 52.9% male                                                                                                                                       | 1,240 | Cross-sectional study | Pittsburgh Sleep Quality Index (PSQI) | Sleep quality                   | Participants who did not meet the guidelines for moderate-to-vigorous physical activity (MVPA) had higher prevalence of poor sleep quality (aPR = 1.68; 95% CI = 1.24–2.26), short sleep duration (aPR = 1.15; 95% CI = 1.00–1.31), and sleep problems (aPR = 1.22; 95% CI = 1.10–1.35)                                                                                                                                                                                                                                                                                                                                  |
| Al-Musharaf et al., 2020 | Saudi Arabia                                                         | A total of 638 young women, with a mean age of 22.0 years ± 1.9 years, were studied. More than half of the women (413; 60%) were undergraduates, and the majority of the sample was unemployed (579; 91%) | 638   | Cross-sectional study | Pittsburgh Sleep Quality Index        | Sleep Quality<br>Sleep duration | PHQ-9 score was positively correlated with the global PSQI score ( $r = 0.25$ , $p < 0.001$ ) and negatively correlated with the duration of sleep (h/day) ( $r = -0.18$ , $p < 0.001$ )<br>GAD-7 anxiety score was positively correlated with a higher global PSQI score (worse sleep) ( $r = 0.178$ , $p < 0.001$ ) and negatively correlated with duration of sleep (hours/day) ( $r = -0.21$ , $p < 0.001$ )<br>The stress score was positively correlated a higher global PSQI (worse sleep) ( $r = 0.159$ , $p < 0.001$ ) and negatively correlated with duration of sleep (h/day) ( $r = -0.196$ , $p < 0.001$ ). |
| Al-Mutawa et al., 2021   | Kuwait, Qatar, Saudi Arabia, Bahrain, United Arab Emirates, and Oman | 14,171 participants, 67.3% females and 60.4% younger than 35 years old. 64.2% from Kuwait                                                                                                                 | 14171 | Cross-sectional study | Insomnia Severity Index               | Sleep problems (insomnia)       | Insomnia among Omani participants was 48.4% UAE participants 66.7%<br><br>Participants in UAE (AOR = 1.455; 1.209–1.750) and Kuwait (AOR = 1.412; 1.244–1.602) were 40% more likely to show insomnia symptoms than participants in Oman.<br><br>Females were also shown to be more susceptible to insomnia during the pandemic since they were 55% more likely to report sleeping problems compared to males                                                                                                                                                                                                             |

|                       |              |                                                                                                                                               |      |                       |                                                                                        |                                 |                                                                                                                                                                                                                                                                                                                                                                                                                                                                                                                                                                                                                                                                                                                                                                                                                                                                                                                                                                                                                                                                                                                                                                                                                                                                                                                                     |
|-----------------------|--------------|-----------------------------------------------------------------------------------------------------------------------------------------------|------|-----------------------|----------------------------------------------------------------------------------------|---------------------------------|-------------------------------------------------------------------------------------------------------------------------------------------------------------------------------------------------------------------------------------------------------------------------------------------------------------------------------------------------------------------------------------------------------------------------------------------------------------------------------------------------------------------------------------------------------------------------------------------------------------------------------------------------------------------------------------------------------------------------------------------------------------------------------------------------------------------------------------------------------------------------------------------------------------------------------------------------------------------------------------------------------------------------------------------------------------------------------------------------------------------------------------------------------------------------------------------------------------------------------------------------------------------------------------------------------------------------------------|
|                       |              |                                                                                                                                               |      |                       |                                                                                        |                                 | <p>All age groups younger than 35 years old were about 3 times more likely to show insomnia symptoms than age group &gt;65. The most susceptible age group was shown to be 18 to 24 years old with an adjusted odds ratio of 3.286. Divorced individuals were 31.5% more likely to have sleeping problems than married individuals.</p> <p>Students (AOR = 1.422; 1.227–1.647) were 42%, and unemployed individuals (AOR = 1.305; 1.171–1.454) were 30% more likely to experience sleeping problems.</p> <p>Non-smokers were also 36.5% less likely to report any sign of insomnia than smokers (AOR = 0.635; 0.578–0.698) participants with underlying psychological disorders were 2.1 times (AOR = 2.098; 1.831–2.404) and individuals with underlying medical conditions 34% more likely to experience any symptom of insomnia (AOR = 1.340; 1.218–1.474).</p> <p>Regarding the duration of lockdown, participants who were in no lockdown or experienced the lockdown for &lt;7 days were 18.2% less likely to show insomnia symptoms (AOR = 0.818; 0.746–0.897) compared to those who were in lockdown for more than 30 days. Finally, participants who were never infected with COVID-19 were 18.1% less likely to experience sleep problems than those who contracted COVID-19 at least once (AOR = 0.819; 0.672–0.998)</p> |
| Al-Saleh et al., 2021 | Saudi Arabia | 1641 respondents were included in the current survey. Male participants were 733 (44.7%) and 61.1% of the participants aged 35 years or more. | 1641 | Cross-sectional study | Survey items developed by the study's author including questions on sleeping duration. | Sleep duration                  | Daily sleep hours for less than 8 hours were recorded for 662 (40.3%) participants and family troubles was reported by 44% of the respondents. Poor sleep hygiene was significantly higher among males than females.                                                                                                                                                                                                                                                                                                                                                                                                                                                                                                                                                                                                                                                                                                                                                                                                                                                                                                                                                                                                                                                                                                                |
| Alah et al., 2022     | Qatar        | 1061 participants. Majority were men (757; 71.3%), 35 to 54 years                                                                             | 1061 | Cross-sectional study | Survey items developed by the study's author                                           | Sleep duration<br>Sleep quality | 488 (46%) reported an increase in sleep duration, 149 (14%) reported a decrease. The mean sleep duration increased significantly                                                                                                                                                                                                                                                                                                                                                                                                                                                                                                                                                                                                                                                                                                                                                                                                                                                                                                                                                                                                                                                                                                                                                                                                    |

|                       |              |                                                                                                                                                                                                                                                                                                                  |      |                       |                                                                                                |                                                                                   |                                                                                                                                                                                                                                                                                                                                                                                                                                                                                                                                                                                                                                                            |
|-----------------------|--------------|------------------------------------------------------------------------------------------------------------------------------------------------------------------------------------------------------------------------------------------------------------------------------------------------------------------|------|-----------------------|------------------------------------------------------------------------------------------------|-----------------------------------------------------------------------------------|------------------------------------------------------------------------------------------------------------------------------------------------------------------------------------------------------------------------------------------------------------------------------------------------------------------------------------------------------------------------------------------------------------------------------------------------------------------------------------------------------------------------------------------------------------------------------------------------------------------------------------------------------------|
|                       |              | old (585; 55.1%), married (850; 80.1%), and have completed college or a higher degree of education (832; 78.4%). Over 50 nationalities were reported by participants with the most common being Indian nationality (56.6%). Only 37 (3.5%) Qatari nationals participated. 565 (53.3%) shifted to work from home. |      |                       | including questions on sleep duration and sleep quality                                        |                                                                                   | from 6.90h/d before to 7.78h/d during home confinement (0.89 hour mean difference, 95% CI: 0.74 to 1.04, P<0.001).<br><br>165 (29.2%) of those working from home and 131 (26.4%) of those who continued working regularly reported poorer sleep quality during home confinement as compared with before.                                                                                                                                                                                                                                                                                                                                                   |
| Alfawaz et al., 2021  | Saudi Arabia | Students, staff and faculty of King Saud University<br>47% (726) of the study participants were males and 53% (816) were females. A large proportion of participants were from the age-group of 20–45 years (1229, 79.7%) and most were educated either up to graduate or higher level (1434, 93%).              | 1542 | Cross-sectional study | Survey items developed by the study's author including questions on sleep problems (insomnia). | Sleep problems (insomnia)                                                         | 496 (32.2%) of the participants reported suffering from insomnia constantly (233, 15.1%) or sometimes (263, 17.1%) during lockdown.                                                                                                                                                                                                                                                                                                                                                                                                                                                                                                                        |
| Alghamdi et al., 2022 | Saudi Arabia | Females (n = 236, 64.13%), single (n = 356, 96.74%), and in their senior year (n = 256, 69.57%). The mean age of the participants was 20.4 ± 1.6 years (range: 18–26 years)                                                                                                                                      | 382  | Cross-sectional study | Generalized Sleep Disturbance Scale                                                            | Sleep duration<br>Sleep quality<br>Sleep problems (sleep disturbance, nightmares) | Most participants did not suffer from the presence of nightmares during the quarantine period (n = 251, 68.21%); however, (n = 52, 20.72%) experienced new-onset nightmares when the quarantine started. The presence of nightmares was more significant among females (n = 86; 73.8%) than males (n = 31; 26.5%, $\chi^2(1) = 6.5$ ; p = 0.010.)<br>Male participants with statistically significant nightmares reported frequent early waking from sleep (n = 24, 58.54%) and frequent daytime sleepiness (n = 20, 48.78%). On the other hand, female participants with statistically significant nightmares reported frequent difficulty falling asleep |



|                      |              |                                                                                                                                                                                                                                                                                |      |                       |                                                                        |                                                              |                                                                                                                                                                                                                                                                                                                                                                                                                                                                                                                                                                                                                                                                                                                                  |
|----------------------|--------------|--------------------------------------------------------------------------------------------------------------------------------------------------------------------------------------------------------------------------------------------------------------------------------|------|-----------------------|------------------------------------------------------------------------|--------------------------------------------------------------|----------------------------------------------------------------------------------------------------------------------------------------------------------------------------------------------------------------------------------------------------------------------------------------------------------------------------------------------------------------------------------------------------------------------------------------------------------------------------------------------------------------------------------------------------------------------------------------------------------------------------------------------------------------------------------------------------------------------------------|
|                      |              |                                                                                                                                                                                                                                                                                |      |                       |                                                                        |                                                              | (n = 92, 71.87%), frequent waking up during sleep (n = 84, 65.62%), and frequent daytime sleepiness (n = 72, 56.25%).<br>The mean GSDS was 45.0 ± 14.9 (range: 12–130). There was no difference in the mean GSDS between males and females.<br>The mean subjective reported sleep duration (total daily sleep time) was 7.98 ± 1.8 h; (range 4–15 h). There was a statistically significant difference in the mean sleep duration between males (mean = 7.7 ± 1.6 h) and females (mean = 8.1 ± 1.8 h; t(366) = -2.2; p = 0.029). Approximately 33.4% (n = 123) of the participants reported taking naps during the day (mean = 1.7 ± 0.96 h/d; range: 0–5 h/d). Most participants reported poor sleep quality (n = 226, 61.41%). |
| Alharbi et al., 2021 | Saudi Arabia | 3032 responses<br>The majority of respondents (64.4%) were females.                                                                                                                                                                                                            | 3032 | Cross-sectional study | The Insomnia Severity Index                                            | Sleep disorder (insomnia)                                    | Respondents who are younger, reported having a diagnosed mental illness, have never been married, and students had significantly higher ISI scores than others.<br>The results of the regression model indicate that the most important factors associated with insomnia severity during the COVID-19 pandemic were the level of depression and anxiety, along with the respondent's intolerance of uncertainty, history of a sleep disorder, younger age, and whether they used emotion-based coping strategies.                                                                                                                                                                                                                |
| Alharbi et al., 2021 | Saudi Arabia | 790 responses were included. The majority of participants were the Saudi population (n=735; 92.9%). Two-thirds of the participants were employed. A total of 27.5% were healthcare workers, 45.1% were enterprise or institution workers, and 27.5% were teachers or students. | 790  | Cross-sectional study | Pittsburgh sleep quality index score<br><br>Athens sleep questionnaire | Sleep quality<br>Sleep duration<br>Sleep disorder (insomnia) | The overall Global PSQI was 6.67±3.82 for all participants<br>The prevalence of insomnia and poor sleep quality were 54.4% and 55.5%, respectively. Saudi citizenship was associated with longer sleep duration (p=0.031).<br>Female gender and being married were associated with worse global PSQI, sleep quality, sleep distribution, sleep latency, and daytime dysfunction. In terms of sleep duration, the male gender was worse than the female gender (p<0.001)<br>The prevalence of insomnia was 430 (54.4%).<br>Compared to non-Saudi participants, Saudi                                                                                                                                                              |

|                        |              |                                                                                                                                                                                                                                                                |     |                       |                                                                                     |                                                    |                                                                                                                                                                                                                                                                                                                                                                                                                                                                                                                                                                                                                                                                                                                |
|------------------------|--------------|----------------------------------------------------------------------------------------------------------------------------------------------------------------------------------------------------------------------------------------------------------------|-----|-----------------------|-------------------------------------------------------------------------------------|----------------------------------------------------|----------------------------------------------------------------------------------------------------------------------------------------------------------------------------------------------------------------------------------------------------------------------------------------------------------------------------------------------------------------------------------------------------------------------------------------------------------------------------------------------------------------------------------------------------------------------------------------------------------------------------------------------------------------------------------------------------------------|
|                        |              |                                                                                                                                                                                                                                                                |     |                       |                                                                                     |                                                    | participants were linked to a greater prevalence of insomnia (45.5% versus 55%)<br>the prevalence of insomnia was 61.3% in the single participants and 50.4% in the married participants.                                                                                                                                                                                                                                                                                                                                                                                                                                                                                                                      |
| Aljemaiah et al., 2020 | Saudi Arabia | 347 participants from Taif, Saudi Arabia<br>n = 213 (61.4%) males and n = 134 (38.6%) females. The mean age was 35.5 years (s.d. = 10.3 years). The age range was 12 to 63 years.                                                                              | 347 | Cross-sectional study | 4DSQ scale                                                                          | Sleep quality                                      | Sleep disruption was reported during the initial phase of the lockdown as people's quality of sleep was severely reduced.                                                                                                                                                                                                                                                                                                                                                                                                                                                                                                                                                                                      |
| Allam et al., 2021     | Egypt        | A random sample of 336 staff members employed at Menoufia University age of the participants under the study ranged from 22 to 63 years (35.34±9.0), most of them were married and from urban residence (77.1% and 69%, respectively), and 51.2% were females. | 336 | Cross-sectional study | Survey items developed by the study's author including questions on sleep problems. | Sleep duration<br>Sleep quality<br>Sleep problems  | Workaholics had higher risks than relaxed ones for sleep problems in terms of difficulty initiating sleep, difficulty maintaining sleep, and insufficient sleep (OR: 1.97, 3.39, and 2.23; respectively)                                                                                                                                                                                                                                                                                                                                                                                                                                                                                                       |
| Alnofaiey et al., 2020 | Saudi Arabia | 340 (73.6%) had an age ranging from 23–30 years, 235 (50.9%) were females, 202 (43.7%) were from Taif city, 256 (55.4%) were residents, and 18.6% had an internal medicine specialty.                                                                          | 340 | Cross-sectional study | Pittsburgh Sleep Quality Index (PSQI) scale.                                        | Sleep duration<br>Sleep quality<br>Sleep disorders | Prevalence of sleep disorders was 43.9%, doctors in the age group of 31–40 years, associate consultants had a significant higher prevalence of sleep disorders.<br>Medical interns and laboratory/pathology/microbiology doctors had a significant more difficulty in fall asleep during COVID-19, and internists and surgeons had a significant higher percent of those who used sleeping pills.<br>Resident doctors had a significant higher percent of having trouble in staying awake, and residents and consultants had a significant higher percent of those who suffered decreased sleep duration.<br>Sleep quality during COVID-19 was very good, fair good and very bad in 23.4%, 60% and 3.5% of HCW |

|                        |              |                                                                                                                                                                                                                                                   |      |                       |                                                                                                                         |                                 |                                                                                                                                                                                                                                                                                                                                                                                                                                                                                                                                                                                                                                                                                                                                                                                                                                                                                                                                                                                           |
|------------------------|--------------|---------------------------------------------------------------------------------------------------------------------------------------------------------------------------------------------------------------------------------------------------|------|-----------------------|-------------------------------------------------------------------------------------------------------------------------|---------------------------------|-------------------------------------------------------------------------------------------------------------------------------------------------------------------------------------------------------------------------------------------------------------------------------------------------------------------------------------------------------------------------------------------------------------------------------------------------------------------------------------------------------------------------------------------------------------------------------------------------------------------------------------------------------------------------------------------------------------------------------------------------------------------------------------------------------------------------------------------------------------------------------------------------------------------------------------------------------------------------------------------|
|                        |              |                                                                                                                                                                                                                                                   |      |                       |                                                                                                                         |                                 | respectively. The study observed a negative impact of COVID-19 pandemic on HCW sleep quality.                                                                                                                                                                                                                                                                                                                                                                                                                                                                                                                                                                                                                                                                                                                                                                                                                                                                                             |
| Alomari et al., 2021   | Jordan       | 1757 participants: The majority of the participants were women (69.4%), from a middle-income class (77.0%) while 51.6% held a bachelor's degree and 35.6% were unemployed.                                                                        | 1757 | Cross-sectional study | Survey items developed by the study's author including questions on sleep quality, sleep duration, and sleep disorders. | Sleep duration<br>Sleep quality | >50% (range: 53.1%–59.4%) of the participants reported an “increase” in sleep disturbance, nighttime sleeping, and total sleeping hours while 49.1% reported a “decrease” in daytime sleeping. Only age ( $\chi^2 = 20.2$ ; $p = 0.0001$ ) was associated with changes in sleeping disturbances during COVID-19 confinement. Younger age ( $\beta = -0.02$ ; OR = 0.98; $p = 0.05$ ) was associated with an “increase” in sleeping disturbance<br>Only gender ( $\chi^2 = 13.4$ ; $p = 0.001$ ) is an independent predictor of nighttime sleeping. Being a male is associated with a “decrease” ( $\beta = 0.36$ ; OR = 1.4; $p = 0.006$ ) in nighttime sleeping hours. Being a male ( $\beta = 0.34$ ; OR = 1.41; $p = 0.03$ ) and having a high school ( $\beta = -0.70$ OR = 0.50; $p = 0.007$ ), two-year ( $\beta = -0.67$ ; OR = 0.50; $p = 0.01$ ), and four-year ( $\beta = -0.46$ ; OR = 0.63; $p = 0.05$ ) diplomas are associated with a “decrease” in daytime sleeping hours. |
| Alothman et al., 2021  | Saudi Arabia | A total of 669 individuals attempted to complete the online survey, 554 participants completed at least 2 sections of the survey (82.8%), and 41.3% ( $n = 276$ ) completed the whole online survey. The majority of the sample were female (83%) |      | Cross-sectional study | Pittsburgh Sleep Quality Index                                                                                          | Sleep quality<br>Sleep duration | Most had sufficient sleep duration (7.5 hrs $\pm$ 2.1), and also reported poor sleep quality (5.4 $\pm$ 2.4)                                                                                                                                                                                                                                                                                                                                                                                                                                                                                                                                                                                                                                                                                                                                                                                                                                                                              |
| Alqahtani et al., 2021 | Saudi Arabia | 593 participants 7.7% were males, and 42.3% were females. The response from the age group of 20–30 years was 38.6%, 30.4% were between 31 and 40 years, 17% were in the                                                                           | 593  | Cross-sectional study | Pittsburgh Sleep Quality Index                                                                                          | Sleep quality<br>Sleep duration | The PSQI score (7.2) of the female respondents were higher than that of the males. The mean latency to fall asleep of the former was 42.51 (SD 31.6) min, which was longer than that of the latter.<br>Although the mean PSQI score and the sleep latency of the age group 51 years were high, the mean sleep duration was the shortest.                                                                                                                                                                                                                                                                                                                                                                                                                                                                                                                                                                                                                                                  |

|                        |              |                                                                                                                                        |     |                       |                                       |                                 |                                                                                                                                                                                                                                                                                                                                                                                                                                                                                                                                                                                                                                                                                                                                                                                                                                                                                                                                                                                                                                                                                                                                                                                                                                                                                                                                                                                                |
|------------------------|--------------|----------------------------------------------------------------------------------------------------------------------------------------|-----|-----------------------|---------------------------------------|---------------------------------|------------------------------------------------------------------------------------------------------------------------------------------------------------------------------------------------------------------------------------------------------------------------------------------------------------------------------------------------------------------------------------------------------------------------------------------------------------------------------------------------------------------------------------------------------------------------------------------------------------------------------------------------------------------------------------------------------------------------------------------------------------------------------------------------------------------------------------------------------------------------------------------------------------------------------------------------------------------------------------------------------------------------------------------------------------------------------------------------------------------------------------------------------------------------------------------------------------------------------------------------------------------------------------------------------------------------------------------------------------------------------------------------|
|                        |              | age group of 41–50 years, and 14% were 51 years. Most of the respondents were from Jazan (43.8%)                                       |     |                       |                                       |                                 | <p>The latency to fall asleep in the age groups of 41–50 years were higher, i.e., 45.13 (SD 34.3) min.</p> <p>The PSQI score and the latency to fall asleep of graduates and postgraduates were higher than those of the respondents with primary and high school education.</p> <p>The respondents with hypertension had the highest PSQI score of 8.09, followed by the subjects with asthma (7.74).</p> <p>However, the sleep duration of the subjects with hypertension was short. The subjects with asthma had the highest latency to fall asleep (55.61 SD 36.01 min) among the individuals with other comorbidities. Individuals with a family history of psychiatric disorders and sleeping pills had higher PSQI scores</p> <p>The presence of comorbidities was related to sleep duration (<math>\chi^2 = 12.13</math> [5], <math>p = 0.03</math>). Sleep duration affected males more than females (OR 1.92 [1.3–2.7], <math>p = 0.001</math>) and subjects aged 51 years (OR 2.49 [1.3–4.4], <math>p = 0.002</math>)</p> <p>Being worried/anxious of the infection significantly affected sleep latency (<math>t = 2.3</math> [591], <math>p = 0.018</math>), sleep duration (<math>t = 4.5</math> [591], <math>p = 0.001</math>), sleep efficiency (<math>t = 2.7</math> [1.0], <math>p = 0.005</math>), and PSQI score (<math>t = 2.84</math> [591], <math>p = 0.005</math>)</p> |
| AlRasheed et al., 2021 | Saudi Arabia | The study included 836 participants. The median age was 28 years, 624 (74.64%) were females, and 158 (18.90%) were healthcare workers. | 836 | Cross-sectional study | Pittsburgh Sleep Quality Index (PSQI) | Sleep quality<br>Sleep duration | Factors associated with poor sleep were recent changes in the sleep habits $p = 0.004$ , anxiety or fear because of coronavirus news on social media $p = 0.02$ , fear because there was no approved drug to treat COVID-19 $p = 0.03$ , and unaware of the presence of chronic diseases $p = 0.03$ . Female gender $p = 0.02$ , fear or anxiety because of coronavirus news on social media $p = 0.04$ , recent change in sleep habits (OR: 1.97 (1.15–3.39); $p = 0.01$ ), fear because there is no approved drug to treat COVID-19 $p = 0.001$ , monthly income <1000 SR $p = 0.01$ , and isolation $p = 0.01$ ) were                                                                                                                                                                                                                                                                                                                                                                                                                                                                                                                                                                                                                                                                                                                                                                       |

|                         |                      |                                                                                                                                                                                                                                                                                                                                                                                                                                |      |                       |                                                                                     |                                            |                                                                                                                                                                                                                                                                                                                                                                                                                    |
|-------------------------|----------------------|--------------------------------------------------------------------------------------------------------------------------------------------------------------------------------------------------------------------------------------------------------------------------------------------------------------------------------------------------------------------------------------------------------------------------------|------|-----------------------|-------------------------------------------------------------------------------------|--------------------------------------------|--------------------------------------------------------------------------------------------------------------------------------------------------------------------------------------------------------------------------------------------------------------------------------------------------------------------------------------------------------------------------------------------------------------------|
|                         |                      |                                                                                                                                                                                                                                                                                                                                                                                                                                |      |                       |                                                                                     |                                            | associated with distress. PSQI and K10 scores were significantly correlated $p < 0.001$ ).                                                                                                                                                                                                                                                                                                                         |
| AlRasheed et al., 2021  | Saudi Arabia         | The study included a total of 353 participants; 88 were in isolation because they had current or suspected COVID-19 infection or because they had just arrived from abroad, with 265 non-isolated individuals serving as controls. The age of the isolated group was $28.6 \pm 9.8$ (mean $\pm$ standard deviation) years versus $27.5 \pm 8.5$ years for the non-isolated group, with males accounting for 37% in both groups | 353  | Cross-sectional study | Pittsburgh Sleep Quality Index (PSQI)                                               | Sleep duration<br>Sleep quality            | The mean PSQI score was $8.5 \pm 3.6$ and $8.4 \pm 3.5$ for the isolated and non-isolated groups, respectively ( $P = 0.92$ ).<br>Poor sleep (PSQI $\geq 6$ ) was reported in 235 (66.6%)<br>Isolation was not associated with poor sleep (OR: 0.73 (95% CI: 0.41–1.3), $P = 0.29$ )                                                                                                                               |
| Alshumrani et al., 2022 | Saudi Arabia         | A total of 1091 participants were surveyed; 643 (58.9%) were COVID-19 patients. The mean age of the patients in the COVID-19 arm was $42.8 \pm 15.2$ years, with a male predominance of 61.1%.                                                                                                                                                                                                                                 | 1091 | Cross-sectional study | Athens Insomnia Scale                                                               | Sleep quality<br>Sleep disorder (insomnia) | The majority (58.1%) reported worsened sleep during the COVID-19 pandemic.<br>Poor sleep quality was reported in 66.1% of the patients in the COVID-19 group (mean score of $6.9 \pm 4.0$ ) and 72.8% of participants in the control group (mean score $7.6 \pm 4.3$ ). Insomnia affected 50.5% of the patients with COVID-19 (mean score of $6.5 \pm 5.5$ ) and 58.5% of controls (mean score of $7.6 \pm 5.5$ ). |
| Arafa et al., 2021      | Egypt                | 1629 participants, 48.1% were aged $\leq 30$ years, 42.4% were men, and 20.0% were working in the health sector                                                                                                                                                                                                                                                                                                                | 1629 | Cross-sectional study | Survey items developed by the study's author including questions on sleep duration. | Sleep duration                             | inadequate sleeping (less than 6hrs/ day) (23.1%)                                                                                                                                                                                                                                                                                                                                                                  |
| Badri et al., 2021      | United Arab Emirates | 574 older adults in Abu Dhabi<br>About 60% were male and 40% were female.<br>Most of them were                                                                                                                                                                                                                                                                                                                                 | 574  | Cross-Sectional study | Survey items developed by the study's author including questions on                 | Sleep disorders                            | The analysis took each of the ten psychological feelings as dependent variables, where time was treated as the only independent variable. and resulted in ten individual regression analyses. Sleeping disorders showed significance at the 0.05                                                                                                                                                                   |

|                            |                      |                                                                                                                                                                                                                                                                                |      |                           |                                                                      |                                                   |                                                                                                                                                                                                                                                                                                                                                                                                                                                    |
|----------------------------|----------------------|--------------------------------------------------------------------------------------------------------------------------------------------------------------------------------------------------------------------------------------------------------------------------------|------|---------------------------|----------------------------------------------------------------------|---------------------------------------------------|----------------------------------------------------------------------------------------------------------------------------------------------------------------------------------------------------------------------------------------------------------------------------------------------------------------------------------------------------------------------------------------------------------------------------------------------------|
|                            |                      | married (82.4%), while only (7.7%) were single. Around (3.1%) were separated, widowed, or divorced. About 40% were Emirati and 60% were non-Emiratis.                                                                                                                          |      |                           | sleep duration.                                                      |                                                   | level. The positive standardized coefficients and t-values note more negative development for sleeping for older adults, suggesting that time harms the development of the sleeping disorders.                                                                                                                                                                                                                                                     |
| Barbato et al., 2021       | United Arab Emirates | international sample of foreign workers (n = 319) resident in the United Arab Emirates (UAE). The majority of participants were female (76%), European (69%) and highly educated (83% had a bachelor's or higher degree)                                                       | 319  | Cross-sectional study     | Insomnia Severity Index                                              | Sleep disorders (insomnia)                        | Insomnia symptoms were observed in 33% of participants, with 4% of participants showing severe symptoms. A higher reported prevalence of insomnia was observed among younger participants, females, and a more severe impact of COVID-19 in the home country.                                                                                                                                                                                      |
| Başkan et al., 2021        | Turkey               | Using the snowball sampling method for sample selection, 1,909 individuals aged 18-65 years living in Turkey. 69% of the respondents was female, 48.9% was married, 68.5% had moderate income, and 43.1% was civil servant. Of the participants, 78.6% was university graduate | 1909 | descriptive type research | Pittsburgh Sleep Quality Index (PSQI)                                | Sleep quality                                     | The PSQI score was $7.78 \pm 3.46$ , and 71.6% of the participants had poor sleep quality. A significant, positive and weak relationship was found between the total scores on PSQI and PSS ( $p < 0.05$ )                                                                                                                                                                                                                                         |
| Cheikh Ismail et al., 2020 | United Arab Emirates | 1012 participants, highest number of participants residing in Abu Dhabi (33.9%) and Dubai (32.5%)<br>Females (75.9%), aged 26–35 years (29.1%), were married (56.4%), had no children (50%), completed a bachelor's                                                            | 1012 | Cross-sectional study     | Copenhagen Psychosocial Questionnaire (COPSOQ-II) with modifications | Sleep quality<br>Sleep duration<br>Sleep disorder | Significant decrease in the percentage of participants who reported sleeping less than seven hours per night from 51.7% before the pandemic to 39% during the pandemic ( $p < 0.001$ )<br>A higher percentage of participants reported poor sleep quality during the pandemic (28.1%) compared to before the pandemic (17.3) ( $p < 0.001$ ), and sleep disturbances were also more common during the pandemic (60.8%) compared to before (52.9%). |

|                            |                                                                                                                             |                                                                                                                                                                                                                                                                                                                                                                                                                                                            |      |                       |                                       |                                                   |                                                                                                                                                                                                                                                                                                                                                                                                                                                                                                                                                                                                                     |
|----------------------------|-----------------------------------------------------------------------------------------------------------------------------|------------------------------------------------------------------------------------------------------------------------------------------------------------------------------------------------------------------------------------------------------------------------------------------------------------------------------------------------------------------------------------------------------------------------------------------------------------|------|-----------------------|---------------------------------------|---------------------------------------------------|---------------------------------------------------------------------------------------------------------------------------------------------------------------------------------------------------------------------------------------------------------------------------------------------------------------------------------------------------------------------------------------------------------------------------------------------------------------------------------------------------------------------------------------------------------------------------------------------------------------------|
|                            |                                                                                                                             | degree (54.1%), worked full-time (53.3%), and were working or studying from home during quarantine (61.6%).                                                                                                                                                                                                                                                                                                                                                |      |                       |                                       |                                                   | 30.9% of the surveyed participants reported feeling lazy and less energized during the pandemic, compared to only 4.7% before the pandemic ( $p < 0.001$ )<br>Sleep disturbances increase was significantly higher in females ( $p = 0.011$ ).<br>Sleep duration and quality was most affected among participants aged 18–35 ( $p < 0.001$ ).                                                                                                                                                                                                                                                                       |
| Cheikh Ismail et al., 2021 | Bahrain, Egypt, Iraq, Jordan, Kuwait, Lebanon, Oman, Palestine, Qatar, Saudi Arabia, Syria, United Arab Emirates and Yemen. | 2970 participants from 18 countries in the MENA region<br>The largest proportion of respondents was from the United Arab Emirates (13.1 %), Jordan (11.9 %), Lebanon (11.5 %), Saudi Arabia (8.3 %) and Palestine (6.4 %).<br>28.4 % males, aged 18–25 years (29.6 %), were married (53.2 %), had no children (49.7 %), completed a university degree (48.5 %), worked full-time (44.8 %) and were working/studying from home during the lockdown (56.0 %) | 2970 | Cross-sectional study | Copenhagen Psychosocial Questionnaire | Sleep quality<br>Sleep duration<br>Sleep disorder | Although the percentage of participants who were sleeping <7 h per night decreased from 51.4 % before the pandemic to 36.6 % during the pandemic, the percentages of participants reporting poor sleep quality increased from 17.1 % before the pandemic to 29.2 % during the pandemic ( $P < 0.001$ ).<br>Moreover, a higher percentage of participants reported sleep disturbances during the pandemic (63.2 %) compared with before (53.1 %). As a result, 29.6 % of the participants reported feeling lazy and less energised during the pandemic, compared with only 4.7 % before the pandemic ( $P < 0.001$ ) |
| Cigiloglu et al., 2020     | Turkey                                                                                                                      | Of the 104 participants, 61 (58.7%) were men, and 75 (72.1%) were ages 65–74. With regard to health, 76.9% of respondents reported a history of at least one chronic disease                                                                                                                                                                                                                                                                               | 104  | Cross-sectional study | Richards-Campbell Sleep Questionnaire | Sleep quality                                     | None of the groups had a mean sleep score indicating very poor sleep quality (score: 0–25). As the monthly income and education level increased, scores for most of the sleep parameters also increased<br>Found that depression and anxiety symptoms were associated with poorer quality of life and sleep quality.                                                                                                                                                                                                                                                                                                |
| Corio et al., 2021         | Israel                                                                                                                      | 2541 participants: Israel (N = 1969) and the U.S. (N = 572)<br>Israeli sample: Age 40.4                                                                                                                                                                                                                                                                                                                                                                    | 2541 | Cross-sectional study | Pittsburgh Sleep Quality Index        | Sleep quality                                     | 56% of the sample were poor sleepers<br>A large majority of the sample (88.9%) reported that their sleeping habits had changed since the pandemic started in at least one of the 6 ways                                                                                                                                                                                                                                                                                                                                                                                                                             |

|                    |        |                                                                                                                                                                                                                                                                                                                                 |     |                       |                                |               |                                                                                                                                                                                                                                                                                                                                                                                                                                                                                                                                                                                                                                                                       |
|--------------------|--------|---------------------------------------------------------------------------------------------------------------------------------------------------------------------------------------------------------------------------------------------------------------------------------------------------------------------------------|-----|-----------------------|--------------------------------|---------------|-----------------------------------------------------------------------------------------------------------------------------------------------------------------------------------------------------------------------------------------------------------------------------------------------------------------------------------------------------------------------------------------------------------------------------------------------------------------------------------------------------------------------------------------------------------------------------------------------------------------------------------------------------------------------|
|                    |        | ± 13.76, Female 55.1% (1085)                                                                                                                                                                                                                                                                                                    |     |                       |                                |               | assessed.<br>Almost 70% of the participants reported they were going to bed later, and almost 50% reported waking up later in the morning<br>the strongest correlations were between use of sleeping medication and both depression (rs = .55, P < .001) and anxiety (rs = .57, P < .001), and between sleep disturbances and both depression (rs = .52, P < .001) and anxiety (rs = .49, P < .001).<br>Participants who reported more COVID-related stress reported significantly poorer sleep quality, with moderate effect sizes                                                                                                                                   |
| Duran et al., 2021 | Turkey | 405 participants, 70.9% of the participants were female, 29.1% were male. While 6.7% of the participants were single, 82.2% had undergraduate or higher degrees. 48.4% were continuing to work from their workplace, 15.1% were continuing to work from home, and 36.5% were not working at a job. 69.4% did not have children. | 405 | Cross-sectional study | Pittsburgh Sleep Quality Index | Sleep quality | Mean sleep quality score was 6.39 ± 3.31. The prevalence of poor sleep quality was 55.1%. The sleep quality of the single participants and the participants with low education levels was poorer. The sleep quality of those who left work in the pandemic period was poorer than those who were working from home/office and those who were already not employed before the pandemic. The sleep quality of those not working in the field of health was better than healthcare professionals and those not working at all. The scores for psychological distress were negatively correlated with sleep quality levels.                                               |
| Eren et al., 2021  | Turkey | 405 participants<br>67.9% (275) of the individuals participating in the study were women, and 34.6% (281) were under 20 years old.<br>68.4% (277) of the individuals are university graduates and high graduate, 67.2% (272) are single, 28.6% (116) have children.                                                             | 405 | Cross-sectional study | Pittsburg Sleep Quality Index  | Sleep quality | While 23% (93) of the participants had sleep problems before the COVID19 outbreak, 40% (162) had sleep problems after the COVID19 outbreak. It was determined that 183 (78.9%) participants with good sleep quality did not have sleep problems after the start of the COVID-19 outbreak, and 113 (65.3%) participants with poor sleep quality experienced sleep problems after the start of the COVID-19 outbreak.<br>As a result of an increase in the state-trait anxiety scale score by 1 point, the risk of poor sleep quality increased 1.051 times (5.1%)<br>A statistically significant relationship was found between PSQI classes and psychiatric diagnosis |



|                           |                 |                                                                                                                                                                                                                                                             |      |                       |                                                                                                                 |                           |                                                                                                                                                                                                      |
|---------------------------|-----------------|-------------------------------------------------------------------------------------------------------------------------------------------------------------------------------------------------------------------------------------------------------------|------|-----------------------|-----------------------------------------------------------------------------------------------------------------|---------------------------|------------------------------------------------------------------------------------------------------------------------------------------------------------------------------------------------------|
|                           |                 |                                                                                                                                                                                                                                                             |      |                       |                                                                                                                 |                           | status ( $\chi^2=4.416$ , $p=0.036$ ). It was found that 226 people (97.4%) with good sleep level had no psychiatric diagnosis, and 12 people (6.9%) with bad sleep level had psychiatric diagnosis. |
| Galali, 2021              | Iraqi Kurdistan | 2137 participants included 74.9% (1,600) from Erbil, 22.3% (476) from Sulaimani, and 2.9% (61) from Duhok. Regarding gender, results showed that 43.4% (927) were male and 56.4% (1,210) were female.                                                       | 2137 | Cross-sectional study | Survey items developed by previous study "EBLC-COVID19 questionnaire" Including questions on sleeping behavior. | Sleep duration            | During the pandemic, the percentage of people reporting sleeping between 7 and 9 hr per night increased from 44.8% to 53.6% and those reporting more than 9 hr sleep increased from 8.1% to 22.4%.   |
| Gokseven et al., 2021     | Israel          | 315 participants: 178 were female and 137 were male. The mean age was $71.5 \pm 5.6$ (min: 65, max: 94) years, and 26 participants were living alone.                                                                                                       | 315  | Cross-sectional study | Survey items developed by the study's author including questions on sleep disorder.                             | Sleep disorder (Insomnia) | 30.8% (n = 97) of the participants stated that they had difficulty falling asleep at night after the onset of COVID-19 infection                                                                     |
| Hadar-Shoval et al., 2021 | Israel          | 421 Participants. The sample comprised 295 women (70%), and participants had a mean age of $37.93 \pm 16.47$ years (range 18-90) and a mean education of $14.39 \pm 2.78$ years. About 53.8% (n=226) lived in urban areas and 46.2% (n=194) in rural areas. | 421  | Cross-sectional study | Pittsburgh Sleep Quality Index                                                                                  | Sleep quality             | For the entire sample, sleep disorder (insomnia), as measured by PSQI, revealed poor sleep quality (6.82; above 5 is an indication of sleep disturbances).                                           |
| Hammoudi et al., 2021     | Lebanon         | 111 (18.8%) males, 480 (81.2%) females                                                                                                                                                                                                                      | 591  | Cross-sectional       | Insomnia Severity Index                                                                                         | Insomnia levels           | Regarding phone screen times among the university students, the prevalence of insomnia, anxiety,                                                                                                     |

|                       |                                 |                                                                                                                                                                         |     |                       |                                                                                      |                |                                                                                                                                                                                                                                                                                                                                                                                   |
|-----------------------|---------------------------------|-------------------------------------------------------------------------------------------------------------------------------------------------------------------------|-----|-----------------------|--------------------------------------------------------------------------------------|----------------|-----------------------------------------------------------------------------------------------------------------------------------------------------------------------------------------------------------------------------------------------------------------------------------------------------------------------------------------------------------------------------------|
|                       |                                 |                                                                                                                                                                         |     | study                 | (ISI), Bedtime Procrastination Scale                                                 |                | depression, and overweight increased with increasing phone screen time. Female sex (adjusted odds ratio [aOR]=2.19, 95% confidence interval [CI]=1.27-3.77), overweight status (aOR=1.85, 95% CI=1.22-1.28), insomnia (aOR=1.06, 95% CI=1.02-1.10), and bedtime procrastination (aOR=1.03, 95% CI=1.00-1.07) were significant predictors of a phone screen time of $\geq 7$ hours |
| Hammouri et al., 2022 | Jordan                          | 467 participants. 297 (64%) responses from females and 170 (36%) from males. The population age was between 18 and 103 years old and the mean was 33.9 years (SD 13.1). | 467 | Cross-sectional study | Survey items developed by the study's author including questions on sleep duration.  | Sleep duration | There is a significant difference in the increase in hours of sleep, where single people (59%) increased the amount of sleep more so than married people (43.4%). The respondents who increased their sleeping hours tended to have a younger mean of age for all significant pairwise comparisons.                                                                               |
| Husain et al., 2020   | Kuwait                          | 415 adults participated in this descriptive cross-sectional study with a mean age of $38.47 \pm 12.73$ years; most of them were females, numbering 285 (68.7%).         | 415 | Cross-sectional study | Survey items developed by the study's author including questions on sleeping habits. | Sleep quality  | With regard to sleeping habits, results indicated significant statistical differences before and during the pandemic, there was a decrease in the percentage of participants who slept during the night and a marked increase in the percentage of participants who slept during the day (OR = 3.99 (95% CI 2.86–6.62), $p < 0.001$ )                                             |
| Hussien et al., 2020  | Egypt, Jordan, and Saudi Arabia | General populations of Egypt (198 participants, 40% female), Jordan (148 participants, 36% female), and Saudi Arabia (358 participants, 42% female) were recruited.     | 704 | Cross-sectional study | Survey items developed by the study's author including questions on sleep quality.   | Sleep quality  | 53.7% of the sample reported sleep disturbances. A high DASS mean score was significantly associated with reporting disturbances in sleep                                                                                                                                                                                                                                         |
| Iqbal et al., 2021    | Saudi Arabia                    | 397 questionnaires from the participants. The respondents were mostly of youth age (19-24 years), 66.5% of respondents were male, while there were 33.5%                | 397 | Cross-sectional study | Pittsburgh sleep quality index                                                       | Sleep quality  | While correlating the sleep patterns disturbance in individuals who had contact with COVID-19 patients, there was a significant sleep disturbance. The disturbance of sleep was in having problems falling sleep ( $p$ -value=0.024), having bad/horrible dreams ( $p$ -value=0.017), feeling cold at sleeping ( $p$ -                                                            |

|                             |              |                                                                                                                                                                                                                                                                             |       |                       |                                                                                                       |                                 |                                                                                                                                                                                                                                                                                                                                                                                                                                                                                                                    |
|-----------------------------|--------------|-----------------------------------------------------------------------------------------------------------------------------------------------------------------------------------------------------------------------------------------------------------------------------|-------|-----------------------|-------------------------------------------------------------------------------------------------------|---------------------------------|--------------------------------------------------------------------------------------------------------------------------------------------------------------------------------------------------------------------------------------------------------------------------------------------------------------------------------------------------------------------------------------------------------------------------------------------------------------------------------------------------------------------|
|                             |              | females. Most of the participants did not contact any COVID-19 patients (75.1%, n=298)                                                                                                                                                                                      |       |                       |                                                                                                       |                                 | value=0.038), and difficulty staying active during eating or driving (p-value=0.012).<br><br>The sleep quality is poor due to the stay-at-home order, having a disorganized working schedule, and deprived lifestyle.                                                                                                                                                                                                                                                                                              |
| Karahan Yilmaz et al., 2021 | Turkey       | A total of 1120 individuals, 412 (36.8 %) male and 708 (63.2 %) females, participated in the study. The mean age was determined as 33.04 ± 11.04. Among those who participated in the research, 84.6 % of individuals were university/bachelor's/master's degree graduates. | 1,120 | Cross-sectional study | Survey items developed by the study's author including questions on sleep quality and sleep duration. | Sleep duration<br>Sleep quality | During the pandemic period, 42.5 % of the individuals stated that they slept more and 40.2 % stated that there was no change in their sleep patterns. Daily physical activity durations were determined as 8.25 ± 1.77 h for sleep                                                                                                                                                                                                                                                                                 |
| Keng et al., 2022           | 86 countries | 67% (n = 4959) of the participants were female                                                                                                                                                                                                                              | 7,402 | Longitudinal study    | Survey                                                                                                | Question on sleep quality       | COVID-related infection risk and perceived economic burden were both negatively associated with sleep quality during the previous week. (b = 0.67, SE = 0.01, p <.001) Those who reported high economic burden (top 10%) reported decreased sleep quality regardless of levels of perceived infection risk, b = -0.02, SE = 0.02, p =.325, whereas people perceiving low economic burden (bottom 10%) reported better sleep quality if their perceived infection risk was also low, b = -0.111, SE = 0.02, p <.001 |
| Kilani et al., 2020         | MENA region  | 917 males, 37.4 ±13.4 years old and 806 females 32.2 ± 11.5 years old                                                                                                                                                                                                       | 1,723 | Cross-sectional study | Pittsburgh Sleep Quality Index (PSQI)                                                                 | Sleep quality                   | t-test analysis revealed a significant difference in mental wellbeing score based on sleep quality (t = -16.413, p < 0.001). A significant number of respondents (43%) reported poor sleep quality. Those with good sleep quality showed significantly better mental wellbeing (15.5 ± 3.4) in comparison with those with poor sleep quality (12.4 ± 4.2) (p <                                                                                                                                                     |

|                          |        |                                                                                                                                                                             |     |                       |                                       |                                                    |                                                                                                                                                                                                                                                                                                                                                                                                                                                                                                                                                                                                                                                                                                                                                                                                                                                                                                                                                                                                                                          |
|--------------------------|--------|-----------------------------------------------------------------------------------------------------------------------------------------------------------------------------|-----|-----------------------|---------------------------------------|----------------------------------------------------|------------------------------------------------------------------------------------------------------------------------------------------------------------------------------------------------------------------------------------------------------------------------------------------------------------------------------------------------------------------------------------------------------------------------------------------------------------------------------------------------------------------------------------------------------------------------------------------------------------------------------------------------------------------------------------------------------------------------------------------------------------------------------------------------------------------------------------------------------------------------------------------------------------------------------------------------------------------------------------------------------------------------------------------|
|                          |        |                                                                                                                                                                             |     |                       |                                       |                                                    | .001)                                                                                                                                                                                                                                                                                                                                                                                                                                                                                                                                                                                                                                                                                                                                                                                                                                                                                                                                                                                                                                    |
| Kolokotroni et al., 2021 | Cyprus | Out of 745 participants (sample of adults who resided in Cyprus during the Spring 2020 lockdown), 74% were female and median age was 39 years.                              | 745 | Cross-sectional study | Pittsburgh Sleep Quality Index        | Sleep quality                                      | <p>Overall participants reported significantly worse sleep quality score (4 v 5, <math>p &lt; 0.01</math>) during lockdown.</p> <p>Regarding the individual PSQI score components (sleep latency, daytime dysfunction, sleep medication and sleep quality), all increased during lockdown (<math>p &lt; 0.01</math>), demonstrating a worse sleep experience, except sleep efficiency, which marginally improved during lockdown (<math>p &lt; 0.01</math>).</p> <p>a positive moderate correlation (<math>r = 0.4064</math>, <math>p &lt; 0.01</math>) between differences in perceived stress and sleep quality index before and during lockdown, indicating that an increase in perceived stress was associated with worsening sleep quality.</p> <p>Overall support index score difference was negatively correlated with sleep quality index difference (<math>r = -0.2253</math>, <math>p &lt; 0.01</math>), showing that a decrease in the overall support index during lockdown was associated with worsening sleep quality.</p> |
| Korkmaz et al., 2020     | Turkey | 61 (44%) females and 79 (56%) males participants<br>The average age for female participants was $30.7 \pm 6.2$ and the average age for male participants was $35.6 \pm 8.7$ | 140 | Cross-sectional study | Pittsburgh Sleep Quality Index (PSQI) | Sleep quality                                      | There was a positive correlation between the Beck Anxiety Inventory (BAI) scores and the PSQI and Problem Solving Inventory (PSI) scores of the participants and a negative correlation between the World Health Organization Quality of Life-BREF (WHOQOL-BREF) scores and the PSQI and PSI scores of the participants ( $p = 0.000$ , $r = 0,508$ ; $p = 0.029$ , $r = 0,184$ ; $p = 0.000$ , $r = -0,360$ )                                                                                                                                                                                                                                                                                                                                                                                                                                                                                                                                                                                                                           |
| Lan et al., 2021         | Israel | Studied the effects of lockdown in three cohorts: (1) 169 individuals from the general population; (2) 91 undergraduate students and (3) 39 women within fertility age.     | 299 | Cohort study          | Sleep logs<br>Online questionnaire    | Sleep duration<br>Sleep quality<br>Sleep disorders | <p>In cohort (1) lockdown resulted in increased sleep duration (<math>p &lt; 0.001</math>), and delayed midsleep point during workdays (<math>p = 0.07</math>) and weekends (<math>p = 0.02</math>) largest change in sleep duration was shown in young people with late chronotype (<math>p = 0.04</math>) and older subjects with early chronotype (<math>p = 0.04</math>).</p> <p>In cohort (2), There were effects of lockdown</p>                                                                                                                                                                                                                                                                                                                                                                                                                                                                                                                                                                                                   |

|                      |              |                                                                                                                                                                                 |       |                       |                                                                                     |                           |                                                                                                                                                                                                                                                                                                                                                                                                        |
|----------------------|--------------|---------------------------------------------------------------------------------------------------------------------------------------------------------------------------------|-------|-----------------------|-------------------------------------------------------------------------------------|---------------------------|--------------------------------------------------------------------------------------------------------------------------------------------------------------------------------------------------------------------------------------------------------------------------------------------------------------------------------------------------------------------------------------------------------|
|                      |              |                                                                                                                                                                                 |       |                       |                                                                                     |                           | (p=0.02) and chronotype (p=0.05) on sleep duration. Increased sleep during lockdown and in early chronotypes. Females slept more during lockdown (p=0.01) and students who work slept less (p=0.02). Midsleep point free days (MSF) was delayed during lockdown (p=0.001) with MSF of late chronotypes later than MSF of early chronotypes (p<0.001).                                                  |
| Lin et al., 2020     | Iran         | A sample of Iranian young adults (n = 1078 with 628 males; mean age = 26.24 years [SD ± 7.41])                                                                                  | 1078  | Cross-sectional study | Insomnia Severity Index                                                             | Sleep disorder (insomnia) | Insomnia was mutually and significantly correlated with psychological distress, problematic social media use, fear of COVID-19, COVID-19 misunderstanding.<br><br>Problematic social media use was significantly associated with insomnia via both direct (B = 0.095; SE = 0.038) and indirect paths.                                                                                                  |
| Lin et al., 2020     | 19 countries | N/A                                                                                                                                                                             | N /A  | Longitudinal study    | Google trends                                                                       | Sleep disorder (insomnia) | The countries with the greatest increases in searches for insomnia were Iran, Spain, the United States, and Italy; these countries exhibited a significant increase in insomnia searches on more than 10 of the 31 days observed. The number of COVID-19–related deaths was positively correlated to the number of days with an increase in searches for insomnia in the 19 countries (p=0.64, P=.003) |
| Lin et al., 2022     | Iran         | Sample of 10,843 participants (mean age = 35.54 years; SD = 12.00), 6751 were females (62.3%)                                                                                   | 10843 | Cross-sectional study | Insomnia Severity Index                                                             | Sleep disorder (insomnia) | Suicidal ideation was positively and significantly correlated with insomnia (r = 0.327; p < 0.001) Generalized trust was negatively and significantly correlated with insomnia (r = -0.100; p < 0.001) insomnia and fear of COVID-19 were positively and significantly correlated (r = 0.271; p < 0.001).                                                                                              |
| Maatouk et al., 2022 | Lebanon      | 948 participants, divided into four groups: non-smokers not at risk (NSNR), non-smokers at risk (NSR), smokers not at risk (SNR), and smokers at risk (SR). A person at risk is | 948   | Cross-sectional study | Survey items developed by the study's author including questions on sleep duration. | Sleep duration            | NSNR significantly increased their sleep duration by 64.284 min per night (p < .001)<br><br>SNR increased their sleep duration by 54.732 min per night (p < .001)                                                                                                                                                                                                                                      |

|                      |                        |                                                                                                                                                                                                                                                                                                                            |     |                       |                                       |                                    |                                                                                                                                                                                                                                                                                                                                                                                                                                                                                                                                                                                                                                                                                                                   |
|----------------------|------------------------|----------------------------------------------------------------------------------------------------------------------------------------------------------------------------------------------------------------------------------------------------------------------------------------------------------------------------|-----|-----------------------|---------------------------------------|------------------------------------|-------------------------------------------------------------------------------------------------------------------------------------------------------------------------------------------------------------------------------------------------------------------------------------------------------------------------------------------------------------------------------------------------------------------------------------------------------------------------------------------------------------------------------------------------------------------------------------------------------------------------------------------------------------------------------------------------------------------|
|                      |                        | <p>an individual with a disease that could worsen the prognosis of a potential COVID-19 infection.</p> <p>Age mean: NSNR (26.52 years, standard deviation = 10.051), NSR (33.26 years, standard deviation = 15.672), SNR (29.55 years, standard deviation = 11.314), and SR (34.39 years, standard deviation = 12.193)</p> |     |                       |                                       |                                    |                                                                                                                                                                                                                                                                                                                                                                                                                                                                                                                                                                                                                                                                                                                   |
| Mahamid et al., 2021 | West bank of Palestine | 129 males and 237 females                                                                                                                                                                                                                                                                                                  | 366 | Cross-sectional study | DSM-5 Level 2—Sleep Disturbance Scale | Sleep disorder( sleep disturbance) | Problematic internet use positively correlated with sleep disturbance ( $r = .19, p < .01$ ), and negatively correlated with life satisfaction ( $r = -.17, p < .01$ ). Moreover, life satisfaction negatively correlated to sleep disturbance ( $r = -.25, p < .01$ ). Sleep disturbance explained statistically and significantly variance in problematic internet use ( $B = .16, SE = .04, \beta = .20$ )                                                                                                                                                                                                                                                                                                     |
| Masoumi et al., 2021 | Iran                   | Mean (SD) age was 28.8 (5.9) years. 119 females (60%)                                                                                                                                                                                                                                                                      | 200 | Cross-sectional study | Mini-Sleep Questionnaire              | Sleep duration and sleep quality   | Sleep quality was 30%, worse in the pandemic period compared to the pre-pandemic states, The mean time to go to bed and wake-up time on weekdays in the pandemic were 35 and 24 min later than those in the pre-pandemic period respectively. The mean time to go to bed and wake-up time on weekends in the pandemic were 21 and 6 min later than those pre-pandemics. Before the pandemic, subjects went to bed on weekends 40 min later than on weekdays ( $p < 0.0001$ ). In the pandemic, this difference decreased to 26 min ( $p < 0.0001$ ). In both the pre-pandemic and pandemic periods, subjects woke up 96 min later on weekends compared to the weekdays ( $p < 0.0001$ ). Before the pandemic, the |

|                               |      |                                                                                                                                                                                                                                              |     |                       |                                                                                     |                           |                                                                                                                                                                                                                                                                                                                                                                                                                                                                                                                                                                                                                                                                                                                                                           |
|-------------------------------|------|----------------------------------------------------------------------------------------------------------------------------------------------------------------------------------------------------------------------------------------------|-----|-----------------------|-------------------------------------------------------------------------------------|---------------------------|-----------------------------------------------------------------------------------------------------------------------------------------------------------------------------------------------------------------------------------------------------------------------------------------------------------------------------------------------------------------------------------------------------------------------------------------------------------------------------------------------------------------------------------------------------------------------------------------------------------------------------------------------------------------------------------------------------------------------------------------------------------|
|                               |      |                                                                                                                                                                                                                                              |     |                       |                                                                                     |                           | mean sleep duration every night was 7 h and 22 min for the weekdays, which decreased to 6 h and 44 min during the pandemic. The difference signified a 38 min sleep debt every night. The night sleep duration on weekdays before the pandemic was 33 min shorter than the night sleep duration on weekends (p <0.0001). This difference decreased to 2 min during the pandemic.                                                                                                                                                                                                                                                                                                                                                                          |
| Najafipour et al., 2021       | Iran | Of 911 participants, 365 (40.1%) were men. Almost half of the participants (51.7%) aged over 55 years. Married people accounted for 80.4% of the samples, 72.7% were illiterate or have non-university education, and 67.6% were unemployed. | 911 | Cross-sectional study | Survey items developed by the study's author including questions on sleep duration. | Sleep duration            | 42.8% and 58.8% experienced sleep time abnormality before and after the quarantine, respectively<br>A high percentage of people experienced an increase in sleep hours (33.7%)<br><br>The odds of an increase in sleep hours was higher in men and young people and lower in people with intense PA and higher levels of anxiety. The changes in the three variables were mostly related to the quarantine, although interaction between PA and sleep was also present.<br><br>There was a negative relationship between anxiety and sleep hours and between PA and sleep hours both before and after quarantine.                                                                                                                                         |
| Nakhostin-Ansari et al., 2021 | Iran | 675 people with a mean age of 40.28 years (SD=11.15) participated in the study. One-hundred and ninety-six (29%) were male, and 479 (71%) were female.                                                                                       | 675 | Cross-sectional study | Insomnia Severity Index                                                             | Sleep disorder (insomnia) | Three hundred and forty-two participants (50.7%) had subthreshold insomnia, 275 (40.7%) participants had moderate insomnia, and 58 participants (8.6%) had severe insomnia. Six-hundred and seventeen participants (91.4%) had DIS, 585 participants (86.7%) had DMS, and 520 participants (77%) suffered from EMA. The prevalence of these disorders was significantly different from each other (P<0.05), and DIS was the most common insomnia pattern.<br>fear of COVID-19 was a risk factor for all patterns of insomnia (OR=1.19, 1.12, 1.02 for DMS, DIS, and EMA, respectively). Age was a risk factor for EMA (OR= 1.09), but it was a protective factor for DMS (OR=0.98). Self-employment was a risk factor for DMS (OR=1.61) and DIS (OR=1.59) |

|                       |                      |                                                                                                                                                                                                                                                                                 |      |                       |                                                                                     |                                                    |                                                                                                                                                                                                                                                                                                                                                                                                                                                                                              |
|-----------------------|----------------------|---------------------------------------------------------------------------------------------------------------------------------------------------------------------------------------------------------------------------------------------------------------------------------|------|-----------------------|-------------------------------------------------------------------------------------|----------------------------------------------------|----------------------------------------------------------------------------------------------------------------------------------------------------------------------------------------------------------------------------------------------------------------------------------------------------------------------------------------------------------------------------------------------------------------------------------------------------------------------------------------------|
|                       |                      |                                                                                                                                                                                                                                                                                 |      |                       |                                                                                     |                                                    | Conclusion: Fear of COVID-19 is a major contributing factor to insomnia patterns. Investigation of COVID-19 fear in people with insomnia and the addition of attributed relieving or management strategies to conventional management of insomnia are reasonable approaches to improve the sleep condition of people in the pandemic.                                                                                                                                                        |
| Okudan et al., 2021   | Turkey               | 37.88±12.44 years age, 346 (68.5%) females and 159 (1.5%) males                                                                                                                                                                                                                 | 505  | Cross-sectional study | Online survey                                                                       | Quality of life (WHO Quality Of Life)-Bref version | 27.5% (N.=142) informed that even they sleep enough time, wake up tired, while 22.1% (N.=114) cannot sleep enough time, and wake up tired.                                                                                                                                                                                                                                                                                                                                                   |
| Oved et al., 2021     | Israel               | Out of the 169 participants, 94 (55.62%) were women, and 75 (44.38%) were men. The age of the participants ranged between 20 and 80, with clear two main age groups: 20–40 and 60–80.                                                                                           | 169  | longitudinal study    | Smartwatch data collection                                                          | Sleep duration<br>Sleep quality                    | An increase was observed in sleep duration based on questionnaire responses (an average of 6.28 h versus 6.42 h, $p < 0.01$ , Cohen's $d = 0.14$ ) and based on smartwatch records (an average of 7.03 h versus 7.12 h, $p = 0.05$ , Cohen's $d = 0.14$ ), MSF (an average hour of 4.03 versus 4.12, $p = 0.02$ , Cohen's $d = 0.13$ ) and MSW (an average hour of 3.43 versus 3.49, $p = 0.07$ , Cohen's $d = 0.08$ ). No significant effects were found for stress, sleep quality and SJL. |
| Radwan et al., 2021   | United Arab Emirates | 2060 responses. Three-quarters (75.1%) were females, 31.7% were between 18 and 30 years old, 38.4% were between 31 and 40 years old, and 29.9% were older than 40 years. Over half of the study population (63.8%) were married and the majority had a university degree (76%). | 2060 | Cross-sectional study | Survey items developed by the study's author including questions on sleep duration. | Sleep duration                                     | Decreased sleep was reported by 20.8%. In terms of sleeping behavior, females were more likely to experience decreased sleep compared to males, whereas older adults (>40 years old vs. 18–30 years old) were less likely to experience decreased sleep during the lockdown.                                                                                                                                                                                                                 |
| Romdhani et al., 2021 | 49 countries         | athletes (mean age: 25.1 (range 18-61) years, 1764 female (45%), 2427 team-sport (63%) and                                                                                                                                                                                      | 3911 | Cross-sectional study | Pittsburgh Sleep Quality Index (PSQI) and Insomnia                                  | Sleep quality, Sleep disorder (insomnia)           | PSQI ( $4.3 \pm 2.4$ to $5.8 \pm 3.1$ ) and ISI ( $4.8 \pm 4.7$ to $7.2 \pm 6.4$ ) scores increased from pre- to during lockdown ( $p < 0.001$ ). PSQI was predominantly influenced by sleep-onset latency ( $p < 0.001$ ; + 29.8%), sleep                                                                                                                                                                                                                                                   |



|                                   |      |                                                                         |      |                       |                                                                                                             |                                                                                                                   |                                                                                                                                                                                                                                                                                                                                                                                                                                                                                                                                                                                                                                                                                                                                                                                                                                                                                                                                            |
|-----------------------------------|------|-------------------------------------------------------------------------|------|-----------------------|-------------------------------------------------------------------------------------------------------------|-------------------------------------------------------------------------------------------------------------------|--------------------------------------------------------------------------------------------------------------------------------------------------------------------------------------------------------------------------------------------------------------------------------------------------------------------------------------------------------------------------------------------------------------------------------------------------------------------------------------------------------------------------------------------------------------------------------------------------------------------------------------------------------------------------------------------------------------------------------------------------------------------------------------------------------------------------------------------------------------------------------------------------------------------------------------------|
|                                   |      | 1442 elite (37%) athletes                                               |      |                       | Severity Index (ISI)                                                                                        |                                                                                                                   | <p>efficiency (<math>p &lt; 0.001</math>; - 21.1%), and total sleep time (<math>p &lt; 0.001</math>; - 20.1%), while ISI was affected by sleep-onset latency (<math>p &lt; 0.001</math>; + 21.4%), bedtime (<math>p &lt; 0.001</math>; + 9.4%), and eating after midnight (<math>p &lt; 0.001</math>; + 9.1%)</p> <p>Athletes went to bed (+ 75 min; 5.4%; <math>d = 1.14</math>) and woke up (+ 150 min; 34.5%; <math>d = 1.71</math>) later during lockdown with an increased total sleep time (+ 48 min; 10.6%; <math>d = 0.83</math>). Lockdown-mediated circadian disruption had more deleterious effects on the sleep quality of individual-sport athletes compared with team-sport athletes (<math>p &lt; 0.001</math>; <math>d = 0.41</math>), elite compared with non-elite athletes (<math>p = 0.028</math>; <math>d = 0.44</math>) and older compared with younger (<math>p = 0.008</math>; <math>d = 0.46</math>) athletes</p> |
| Sadeghniaat-Haghighi et al., 2021 | Iran | 1,223 participants [827 (67.6%) female, mean age=39.82±10.75 years old] | 1223 | Cross-sectional study | Insomnia Severity Index                                                                                     | Sleep disorder (insomnia)                                                                                         | <p>675 (55.2% [95%CI=52.40-57.98]) were categorized into the insomnia group. Insomnia was more prevalent in females (<math>p=0.006</math>), participants with 50 years old or higher (<math>p=0.04</math>), or high fear of COVID-19 (<math>p&lt;0.0001</math>). Totally, 67.4%, 66.4%, and 55% of all participants had DIS, DMS, and EMA, respectively, in the current outbreak. Besides, 79% had impaired daily functioning, 51.6% had impaired quality of life, and 62% were worried about their sleep problem. Notably that a considerable percentage of individuals with normal ISI scores had at least one insomnia phenotype or impaired daily functioning and quality of life. Further analyses revealed a significant increasing trend in all four insomnia phenotypes prevalence with an increase in fear of COVID-19 (all <math>p</math>-values&lt;0.0001).</p>                                                                 |
| Salehinejad et al., 2020          | Iran | Healthy volunteers 137 females, mean age = 25.79 ± 7.31                 | 160  | Cross-sectional study | Pittsburgh Sleep Quality Index (PSQI), Quantitative sleep parameters, Morningness-Eveningness Questionnaire | PSQI: sleep quality, Quantitative Sleep parameters: about time to go to bed (clock), sleep onset latency time (in | <p>PSQI: significant decrease of global sleep quality during quarantine (<math>t = 6.95</math>, <math>p &lt; 0.001</math>). t-test showed that the time to fall asleep was prolonged during home quarantine as compared to the time before quarantine (<math>t= 7.32</math>, <math>p &lt; 0.001</math>). The average sleep duration (in h) was significantly longer during quarantine, as compared to before quarantine as well (<math>t = -3.65</math>, <math>p &lt; 0.001</math>). 85.6 % of the participants (137</p>                                                                                                                                                                                                                                                                                                                                                                                                                   |

|                     |        |                                                                                                                                                                                                                                                                                                  |     |                       |                                                                                     |                                                                                                                  |                                                                                                                                                                                                                                                                                                                                                                                                                           |
|---------------------|--------|--------------------------------------------------------------------------------------------------------------------------------------------------------------------------------------------------------------------------------------------------------------------------------------------------|-----|-----------------------|-------------------------------------------------------------------------------------|------------------------------------------------------------------------------------------------------------------|---------------------------------------------------------------------------------------------------------------------------------------------------------------------------------------------------------------------------------------------------------------------------------------------------------------------------------------------------------------------------------------------------------------------------|
|                     |        |                                                                                                                                                                                                                                                                                                  |     |                       |                                                                                     | minutes), time to get up in the morning, and sleep duration<br>Morningness-eveningness questionnaire: chronotype | of 160) reported at least 1 h delay to get up in the morning on average in home quarantine. The average delay to get up in the morning during home quarantine was 2.28 h. Results showed that participants' time to get up in the morning was significantly delayed during quarantine ( $t= 15.36$ , $p < 0.001$ )                                                                                                        |
| Salman et al., 2021 | Kuwait | Data from 679 respondents (57.9% females and 42.1% males; 67.7% Kuwaiti nationals and 32.3% non-Kuwaiti nationals)                                                                                                                                                                               | 679 | Cross-sectional study | Survey items developed by the study's author include questions on quality of sleep. | Sleep quality                                                                                                    | Mental health was highly correlated with the quality of sleep<br><br>Extremely severe depression was associated with having poor or very poor quality of sleep (1.75 times).<br><br>Severe or extremely severe psychological distress was associated with having poor or very poor quality of sleep (2.20 times)                                                                                                          |
| Salman et al., 2021 | Kuwait | Among 679 respondents, 57.9% were female and 67.7% were Kuwaitis. Age group categories were represented relatively evenly, with 28.7% of respondents in their 20s, 29.3% in their 30s, 23.0% in their 40s, and 19.0% in the age range of 50 years or above. The average age was 37.7 (SD: 11.6). | 679 | Cross-sectional study | Survey items developed by the study's author include questions on quality of sleep. | Sleep quality                                                                                                    | 36.4% of respondents rated their quality of sleep as 'poor' or 'very poor'. Days of physical activity were positively correlated with 'quality of sleep'<br><br>Sleep hours were positively correlated with good quality of sleep. Quality of sleep was negatively correlated with 'consumption of sugary drinks' and 'consumption of sweets and snacks', and positively correlated with 'the days of physical activity'. |
| Savci et al., 2021  | Turkey | The final sample consisted of the remaining 103 older adults residing in a nursing home affiliated with the Istanbul Darulaceze Directorate of Hospice.                                                                                                                                          | 103 | Correlational study   | Survey items developed by the study's author include questions on sleep patterns.   | Sleep quality                                                                                                    | 18.4% of the participants had change in sleep patterns during the pandemic.                                                                                                                                                                                                                                                                                                                                               |

|                             |              |                                                                                                                                                                                                                                                                                   |      |                       |                                                                                                     |                                 |                                                                                                                                                                                                                                                                                                                                                                                                                                            |
|-----------------------------|--------------|-----------------------------------------------------------------------------------------------------------------------------------------------------------------------------------------------------------------------------------------------------------------------------------|------|-----------------------|-----------------------------------------------------------------------------------------------------|---------------------------------|--------------------------------------------------------------------------------------------------------------------------------------------------------------------------------------------------------------------------------------------------------------------------------------------------------------------------------------------------------------------------------------------------------------------------------------------|
|                             |              | The inclusion criteria for the study were as follows: be over 65 years old, voluntarily agree to participate in the study, have a Standardized Mini Mental Test Score of 24 or higher, residence within the nursing home for at least one year, and speak and understand Turkish. |      |                       |                                                                                                     |                                 |                                                                                                                                                                                                                                                                                                                                                                                                                                            |
| Şentürk et al., 2021        | Turkey       | 254 (55.3%) males and 205 (44.7%) females. The age of the participants ranged from 24 to 60 years (M=35.64, SD=6.84) and mean age was 35.64±6.84                                                                                                                                  | 459  | Cross-sectional study | Jenkins Sleep Scale (JSS)                                                                           | Subjective sleep quality        | Poor sleep quality is a predictor of depression ( $\beta=0.378$ , $p<0.001$ ), of anxiety ( $\beta=0.373$ , $p<0.001$ ) and stress ( $\beta=0.324$ , $p<0.001$ )                                                                                                                                                                                                                                                                           |
| Sultan et al., 2021         | Saudi Arabia | Three hundred thirty-eight individuals responded to the survey. Participants were 267 females (79%) and 71 males (21%) with a median age of 40 which ranged from 30 to 44 years.                                                                                                  | 338  | Cross-sectional study | Survey items developed by the study's author include questions on sleep duration and sleep quality. | Sleep duration<br>Sleep quality | The percentage of participants who used to sleep more than nine hours daily increased significantly during the pandemic from 8.3% to 21.8% ( $p<0.001$ ). Use of sleeping aids increased from 11.6% to 15.7% ( $p<0.001$ ), with 7.7% of participants having difficulty falling asleep for more than two hours. Moreover 41.8% did not feel relaxed after getting up from sleep during the pandemic compared to 14.2% before ( $p<0.001$ ) |
| Toprak Celenay et al., 2020 | Turkey       | 375 individuals in the Stay at home group and 311 individuals in the Continued to work group were included in data analysis.                                                                                                                                                      | 686  | Cross-sectional study | Jenkins Sleep Scale                                                                                 | Sleep quality                   | JSS-T scores revealed sleep quality was similar in both groups ( $p > .05$ )                                                                                                                                                                                                                                                                                                                                                               |
| Torkian et al., 2021        | Iran         | 3,446 people completed the questionnaire. most participants were female (66.7%), mean ( $\pm$ SD) age of the                                                                                                                                                                      | 3446 | Cross-sectional study | Pittsburgh Sleep Quality Index                                                                      | Sleep quality                   | 73.5% had poor sleep quality. Perceived income, hours spent outdoors, the number of people with COVID-19 that were acquainted with, and a history of depression were significantly related to sleep quality.                                                                                                                                                                                                                               |

|                     |         |                                                                                                                                                                                                                                                                                                               |      |                       |                                                                                   |                                 |                                                                                                                                                                                                                                                                                                                                                                                                                                                                                                                                                                                                                                                                                                      |
|---------------------|---------|---------------------------------------------------------------------------------------------------------------------------------------------------------------------------------------------------------------------------------------------------------------------------------------------------------------|------|-----------------------|-----------------------------------------------------------------------------------|---------------------------------|------------------------------------------------------------------------------------------------------------------------------------------------------------------------------------------------------------------------------------------------------------------------------------------------------------------------------------------------------------------------------------------------------------------------------------------------------------------------------------------------------------------------------------------------------------------------------------------------------------------------------------------------------------------------------------------------------|
|                     |         | participants was 34.2 ( $\pm$ 11.60) years. 65% were married.                                                                                                                                                                                                                                                 |      |                       |                                                                                   |                                 |                                                                                                                                                                                                                                                                                                                                                                                                                                                                                                                                                                                                                                                                                                      |
| Yalcin et al., 2022 | Turkey  | A sample of 8,276 volunteers, aged between 18 and 65, were recruited via an online platform. The mean age of the sample was 39.86 ( $\pm$ 13.13). Approximately half of the sample were females (47.33%). Majority of volunteers were married (67.85%).                                                       | 8276 | Cross-sectional study | Pittsburgh Sleep Quality Index                                                    | Sleep quality                   | 46.38% of the sample were poor sleepers as indexed by the PSQI<br><br>The PHAM showed that the perceived vulnerability to diseases was significantly associated with poor sleep quality ( $\beta$ = 0.175, $p$ < 0.001)<br><br>Negative affectivity as indexed by DASS-21 was significantly tied to poor sleep quality ( $\beta$ = 0.188, $p$ < 0.001)                                                                                                                                                                                                                                                                                                                                               |
| Yilmaz et al., 2021 | Turkey  | A total of 1120 individuals, 412 (36.8 %) male and 708 (63.2 %) females, participated in the study. The mean age was determined as 33.04 $\pm$ 11.04.                                                                                                                                                         | 1120 | Cross-sectional study | Survey items developed by the study's author include questions on sleep patterns. | Sleep duration<br>Sleep quality | During the pandemic period, 42.5 % of the individuals stated that they slept more and 40.2 % stated that there was no change in their sleep patterns. Daily physical activity durations were determined as 8.25 $\pm$ 1.77 h for sleep.                                                                                                                                                                                                                                                                                                                                                                                                                                                              |
| Younes et al., 2021 | Lebanon | A total of 4397 respondents. Included participants from all Lebanese districts, of whom 2924 (66.5%) were females, and those who received university education were 3664 (83.3%). The recruited participants were young adults between 18–35 years old, among which 3439 (78.2%) aged between 18 and 25 years | 4397 | Cross-sectional study | Insomnia Severity Index                                                           | Sleep disorder (insomnia)       | A considerable proportion of participants had symptoms of insomnia (941 [21.4%]).<br><br>The median IQR scores on the the ISI for insomnia for all respondents was 10 (5–14).<br><br>Higher perceived likelihood of contracting COVID-19 (aOR = 0.67, 95% CI: 0.56; 0.79) resulted in no clinical or subthreshold insomnia.<br><br>Single marital status (aOR = 1.43, 95% CI: 1.05; 1.93), divorced marital status (aOR = 3.33, 95% CI: 1.50; 7.39), university education (aOR = 2.50, 95% CI: 1.51; 4.16), consumption of caffeinated beverages (aOR = 1.24, 95% CI: 1.03; 1.49) and energy drinks (aOR = 1.22, 95% CI: 1.02; 1.47) were significantly associated with moderate to severe insomnia. |

1  
2  
3  
4  
5  
6  
7  
8  
9  
10  
11  
12  
13  
14  
15  
16  
17  
18  
19  
20  
21  
22  
23  
24  
25  
26  
27  
28  
29  
30  
31  
32  
33  
34  
35  
36  
37  
38  
39  
40  
41  
42  
43  
44  
45  
46  
47

|                              |        |                                                                                                  |      |                       |                                                                                     |                 |                                                                                                                                                                                                                                                                                                                                                                                                                                                                                                                                                                                                                                                                                                                                                                                                                                             |
|------------------------------|--------|--------------------------------------------------------------------------------------------------|------|-----------------------|-------------------------------------------------------------------------------------|-----------------|---------------------------------------------------------------------------------------------------------------------------------------------------------------------------------------------------------------------------------------------------------------------------------------------------------------------------------------------------------------------------------------------------------------------------------------------------------------------------------------------------------------------------------------------------------------------------------------------------------------------------------------------------------------------------------------------------------------------------------------------------------------------------------------------------------------------------------------------|
|                              |        |                                                                                                  |      |                       |                                                                                     |                 | <p>Age group of 25–35 years was significantly associated with less insomnia scores (aOR = 0.77, 95% CI: 0.62-0.96) as compared to lower age group of 18–25 years. However, cigarette smoking was significantly associated with higher insomnia (aOR = 1.53, 95% CI: 1.25; 1.88) scores.</p> <p>physical activity of more than 3 times per week during lockdown were significantly associated with less insomnia (aOR = 0.65, 95% CI: 0.52; 0.83)</p> <p>Being a non-Lebanese was significantly associated with insomnia (aOR = 1.42, 95% CI: 1.12; 1.81)</p> <p>Drinking 2L of water or more during lockdown was significantly associated with lower insomnia (aOR = 0.76, 95% CI: 0.65; 0.88)</p> <p>No change in body weight status during lockdown was significantly associated with lower insomnia (aOR = 0.71, 95% CI: 0.58; 0.86)</p> |
| Yurumez Korkmaz et al., 2021 | Turkey | Participants (n = 136; 82 females, 60.3%) had a mean age of 73.4 ± 5.9 years. (Geriatric sample) | 136  | Cross-sectional study | Survey items developed by the study's author including questions on sleep problems. | Sleep disorders | <p>Sleep problems (P = 0.000) were more common in participants with depression and anxiety.</p> <p>Sleep problems were present in one third of our study population, and found to be statistically significantly higher among patients with depression and anxiety. Sleep problems, which may be a component of psychological distress, have been found to be common in elderly people due to social isolation.<sup>32</sup> Also, restricted physical activities and concerns about COVID-19 may lead to sleep disorders.</p>                                                                                                                                                                                                                                                                                                              |
| Zach et al., 2021            | Israel | Participants were 1202 people, 381 males and 821 females, aged 45–90.                            | 1202 | Cross-sectional study | Survey items developed by the study's author including questions on sleep duration. | Sleep duration  | <p>During the time of lockdown sleeping hours increased.</p> <p>Among the younger participants, a positive relationship was found between physical activity and the number of sleeping hours, while in the older ones a positive relationship was found between inactivity and the duration of sleep.</p>                                                                                                                                                                                                                                                                                                                                                                                                                                                                                                                                   |

| Healthcare workers      |                     |                                                                                                                                                                                                                                                                                                           |             |                       |                                                                                     |                      |                                                                                                                                                                                                                                                                                                                                                                                                                                                                                                                                                                                                                                                        |
|-------------------------|---------------------|-----------------------------------------------------------------------------------------------------------------------------------------------------------------------------------------------------------------------------------------------------------------------------------------------------------|-------------|-----------------------|-------------------------------------------------------------------------------------|----------------------|--------------------------------------------------------------------------------------------------------------------------------------------------------------------------------------------------------------------------------------------------------------------------------------------------------------------------------------------------------------------------------------------------------------------------------------------------------------------------------------------------------------------------------------------------------------------------------------------------------------------------------------------------------|
| Reference               | Location of Study   | Population                                                                                                                                                                                                                                                                                                | Sample Size | Study Design          | Sleep Health Measurement Tool                                                       | Sleep Health Domains | Main Findings                                                                                                                                                                                                                                                                                                                                                                                                                                                                                                                                                                                                                                          |
| Aarafa et al., 2021     | Egypt, Saudi Arabia | This study included 426 HCWs (275 from Egypt and 151 from Saudi Arabia) distributed as follows: 206 (48.4%) physicians, 103 (24.2%) nurses, and 117 (27.4%) other HCWs. Of them, 47.2% were aged $\leq 30$ years, 50.2% were men, 65% were living with children, and 51.6% were living with older adults. | 426         | Cross-sectional study | Survey items developed by the study's author including questions on sleep duration. | Sleep duration       | 37.3% had inadequate sleeping (<6 h/day). Female sex, age $\leq 30$ years, working in Egypt, attending emergency and night shifts, watching/reading COVID-19 news $\geq 2$ h/day, and not getting emotional support from family, society, and hospital were associated with a high likelihood of inadequate sleeping.                                                                                                                                                                                                                                                                                                                                  |
| Abbas et al., 2021      | Kuwait              | 217 HCWs at Kuwait MOH hospitals completed the survey with mean ( $\pm$ standard deviation) age of 35.8 ( $\pm 7.3$ ) years; 56.2% were male                                                                                                                                                              | 217         | Cross-sectional study | Pittsburgh Sleep Quality Index                                                      | Sleep Quality        | 64 experienced sleep difficulties before COVID-19 crisis and 21 (9.68%) had a history of consuming medication for sleep difficulties. Prevalence of poor SQ during the COVID-19 pandemic and its stresses increased to 171 (78.8%), with a global PSQI score mean (SD) of 9.36 $\pm$ 4.4; the worst components of SQ were sleep latency, duration, and efficacy. HCWs with poor sleep had higher weekly working hours compared with those with good sleep (67.25% versus 47.83, $p = 0.015$ ). Among the 32 participants who did swabs for suspected COVID-19 patients during their duties, 30 (93.75%) of them ( $p = 0.01$ ) experienced poor sleep. |
| Abdelghani et al., 2021 | Egypt               | 218 HCWs from Egypt.. The mean age of the participants was 39.5 $\pm$ 8.5 years. The majority were females ( $n = 156$ ,                                                                                                                                                                                  | 218         | Cross-sectional study | short health anxiety inventory (SHAI)                                               | Sleep duration       | Those who reported higher levels of health anxiety to COVID-19 virus infection were more likely to be identified as working more days weekly (5.7 $\pm$ 0.8 days) and having lower sleeping hours (6.8 $\pm$ 0.9 hours).                                                                                                                                                                                                                                                                                                                                                                                                                               |

|                         |              |                                                                                                                                                                                                                                                     |     |                       |                                                                                |                                                                   |                                                                                                                                                                                                                                                                                                                                                                                                                                                                                  |
|-------------------------|--------------|-----------------------------------------------------------------------------------------------------------------------------------------------------------------------------------------------------------------------------------------------------|-----|-----------------------|--------------------------------------------------------------------------------|-------------------------------------------------------------------|----------------------------------------------------------------------------------------------------------------------------------------------------------------------------------------------------------------------------------------------------------------------------------------------------------------------------------------------------------------------------------------------------------------------------------------------------------------------------------|
|                         |              | 72%), nurses (n=111, 51%), and married (n=192, 88%)                                                                                                                                                                                                 |     |                       |                                                                                |                                                                   |                                                                                                                                                                                                                                                                                                                                                                                                                                                                                  |
| Abdoli et al., 2021     | Iran         | A total of 321 full-time frontline hospital staff members in Farabi Hospital (mean age: 36.86; 58% females)                                                                                                                                         | 321 | Cross-sectional study | Athens Insomnia Scale                                                          | Sleep problems (insomnia)                                         | Of the 321 participants, 44 (13.7%) had an insomnia score of 0 to 5 points; 272 (86.3%) had a score of six points and higher. The odds to report insomnia was 3.14-fold higher (CI: 2.64–3.75) among participants compared to the general population.                                                                                                                                                                                                                            |
| Abu-Elenin et al., 2021 | Egypt        | 237 physicians, their mean age was 38.2 ± 6.2 years and 58% of them were males.                                                                                                                                                                     | 237 | Cross-sectional study | Electronic questionnaire on mental health including quesitons on sleep quality | Sleep quality                                                     | The mean rate for sleep quality were poor; at 6.5 ± 3.2 out of 10                                                                                                                                                                                                                                                                                                                                                                                                                |
| Al Ammari et al., 2020  | Saudi Arabia | 720 complete responses. 194 (26.94%) Physicians, 262 (36.39%) Nurses, and 171 (23.75%) pharmacists completed the survey. The participants' female respondents (64.17%) were almost double the males (35.83%), with nearly 75% above 30 years of age | 720 | Cross-sectional study | Insomnia severity index                                                        | Sleep problems (insomnia)                                         | The largest proportion of health care workers (85.83%) experienced absence to subthreshold insomnia (57.08 and 28.75%, respectively). The rest (14.16%) reported moderately severe to severe insomnia (10.41% and 3.75%, respectively)                                                                                                                                                                                                                                           |
| Al Maqbali et al., 2021 | Oman         | Frontline nurses, majority were female (90.7%, n = 895), and were married (85%, n = 839). The largest age group was those aged 31–40 years (59.5%, n = 587), followed by 41–50 years (20.1%, n = 198)                                               | 987 | Cross-sectional study | Pittsburgh Sleep Quality Index                                                 | Sleep quality<br>Sleep duration<br>Sleep problems (sleep latency) | 580 (58.8%) experienced poor sleep quality<br>Average sleep duration was 7.04 (SD = 1.59) hours per night with 61.3% (n = 605) of participants reporting sleep of less than 7 h.<br>Mean of sleep latency was 38 min, with 71.4% (n = 705) of the participants reporting more than 15 min.<br>23.7% of the participants reported a sleep efficiency of less than 85%<br>30% rated their quality of sleep as “fairly bad” or “very bad”.<br>The two most common reasons for sleep |

|                        |                      |                                                                                                                                                                                                                                              |     |                       |                                                                                                       |                                 |                                                                                                                                                                                                                                                                                                                                                                |
|------------------------|----------------------|----------------------------------------------------------------------------------------------------------------------------------------------------------------------------------------------------------------------------------------------|-----|-----------------------|-------------------------------------------------------------------------------------------------------|---------------------------------|----------------------------------------------------------------------------------------------------------------------------------------------------------------------------------------------------------------------------------------------------------------------------------------------------------------------------------------------------------------|
|                        |                      |                                                                                                                                                                                                                                              |     |                       |                                                                                                       |                                 | disturbance were “could not get to sleep within 30 min”, and “waking up in the middle of the night or early morning” as reported by 56.03% and 54.31%.                                                                                                                                                                                                         |
| Alghufli et al., 2021  | United Arab Emirates | A total of 400 HCW completed the survey. Majority of them were females (84.5%, n = 338) and aged between 18 and 31 (53.5%, n = 214).                                                                                                         | 400 | Cross-sectional study | Insomnia Severity Index                                                                               | Sleep disorder (insomnia)       | 187 (46.8%) suffered from clinical insomnia HCWs in the fever clinic that had sub-threshold insomnia (26.4%, n = 14). While at the clean and mixed clinics, HCWs had subthreshold insomnia (38.2%, n = 47). Among the 3 HCWs working at telemedicine clinic, insomnia levels were between subthreshold and moderately severe (33.3%, n = 1 for each category). |
| Ali et al., 2021       | Saudi Arabia         | Out of 200 healthcare providers, 40% were males. 52% were aged 31–40 years old, 61% were married. The majority of the participants were Saudi nationals (84%), 74% were nurses, 11% were physicians and 15% were other healthcare providers. | 200 | Cross-sectional study | Insomnia Severity Index                                                                               | Sleep disorder (insomnia)       | Working as a physician was associated with insomnia (OR, 2.32; 95% CI, 0.89–6.07; P = < 0.05)                                                                                                                                                                                                                                                                  |
| Aljuffali et al., 2022 | Saudi Arabia         | 502 pharmacists were included in the present study. Their mean ( $\pm$ SD) age was 31 ( $\pm$ 8) years. Most respondents were female (51.8%). Moreover, most respondents were Saudi pharmacists (88.9%)                                      | 502 | Cross-sectional study | Survey items developed by the study's author including questions on sleep duration and sleep quality. | Sleep quality<br>Sleep duration | Sleeping disturbances were found to be related to high burnout levels                                                                                                                                                                                                                                                                                          |
| Almater et al., 2021   | Saudi Arabia         | One hundred and seven ophthalmologists successfully completed the survey with a response rate of 30.6%. Males constituted 56.1% (n = 60). Ophthalmology                                                                                      | 107 | simple random study   | Insomnia Severity Index                                                                               | Sleep problems (insomnia)       | Overall prevalence of insomnia was 44.9%; 32 had subthreshold symptoms (29.9%), 14 had moderate symptoms (13.1%), and 2 had severe symptoms (1.9%).<br><br>There was also a trend to experience symptoms of                                                                                                                                                    |



|                         |        |                                                                                                                                                                                                                          |      |                       |                                                                                    |                                                              |                                                                                                                                                                                                                                                                                                                                                                                                                                                                                                               |
|-------------------------|--------|--------------------------------------------------------------------------------------------------------------------------------------------------------------------------------------------------------------------------|------|-----------------------|------------------------------------------------------------------------------------|--------------------------------------------------------------|---------------------------------------------------------------------------------------------------------------------------------------------------------------------------------------------------------------------------------------------------------------------------------------------------------------------------------------------------------------------------------------------------------------------------------------------------------------------------------------------------------------|
|                         |        | residents constituted the majority (n = 66, 61.7%)                                                                                                                                                                       |      |                       |                                                                                    |                                                              | insomnia in frontline health-care providers (P = 0.129)                                                                                                                                                                                                                                                                                                                                                                                                                                                       |
| Almhdawi et al., 2022   | Jordan | 326 physicians of all Jordanian medical sectors and specialties successfully completed all of the study survey sections with a mean age of 32.08 ( $\pm 6.93$ ) ranged between 24–70 years and 44.2% of them were males. | 326  | Cross-sectional study | Survey items developed by the study's author including questions on sleep quality. | Sleep quality                                                | poor sleep quality (58.3%)                                                                                                                                                                                                                                                                                                                                                                                                                                                                                    |
| Alshekaili et al., 2020 | Oman   | 1139 HCWs, 228 (20.0%) are males, and 911 (80.0%) are females. Their average age was 36.3 $\pm$ 6.5 (mean $\pm$ SD) ranging from 21 to 65 years. The majority were Omani (n=981, 86.1%) and were married (n=987, 86.9%). | 1139 | Cross-sectional study | Insomnia Severity Index.                                                           | Sleep disorder (insomnia)                                    | 211 (18.5%) respondents were reported to have insomnia. HCWs in the frontline group were 1.5 times more likely to report insomnia (OR=1.586, p=0.013) as compared with those in the non-frontline group.                                                                                                                                                                                                                                                                                                      |
| Amra et al., 2021       | Iran   | Among the 372 HCW participants, 245 (66%) were women and mean age was 34.5 $\pm$ 7.1 years (age range 23 to 58).                                                                                                         | 372  | Cross-sectional study | Pittsburgh Sleep Quality Index<br>Insomnia Severity Index                          | Sleep quality<br>Sleep duration<br>Sleep disorder (Insomnia) | Those participants who were directly caring for the patients including physicians and nurses had significantly higher PSQI but lower ISI questionnaire scores relative to other participants. PSQI were significantly higher in the HCWs with positive coronavirus PCR. ISI were significantly lower in the HCWs with positive Coronavirus RT-PCR than another group. Positive association between COVID-like symptoms and sleep and mood disturbances was found in the group without a positive test result. |
| Araç et al., 2020       | Turkey | 210 volunteers, including 105 healthcare professionals in the emergency department (53.8% female) and 105 healthcare professionals                                                                                       | 210  | Cross-sectional study | Pittsburgh Sleep Quality Index (PSQI)                                              | Sleep disorder                                               | PSQI subscale scores of the participants in the primary group were significantly higher than those of participants in the secondary group.                                                                                                                                                                                                                                                                                                                                                                    |

|                            |        |                                                                                                                                                                                                                                                                           |     |                       |                                    |                           |                                                                                                                                                                                                                                                                                                                                                                                                                                                                                                                                                                                                |
|----------------------------|--------|---------------------------------------------------------------------------------------------------------------------------------------------------------------------------------------------------------------------------------------------------------------------------|-----|-----------------------|------------------------------------|---------------------------|------------------------------------------------------------------------------------------------------------------------------------------------------------------------------------------------------------------------------------------------------------------------------------------------------------------------------------------------------------------------------------------------------------------------------------------------------------------------------------------------------------------------------------------------------------------------------------------------|
|                            |        | working in other departments (46.2% females) rendering services for COVID-19 patients.                                                                                                                                                                                    |     |                       |                                    |                           |                                                                                                                                                                                                                                                                                                                                                                                                                                                                                                                                                                                                |
| Aslan et al., 2022         | Turkey | 845 nurses completed the questionnaire. In total, 72.2% of the nurses were female, 78% were graduates, 57.2% were single, 53.8% had a medium-income level, 69.7% were working in a state hospital, and 7.6% had a chronic disease.                                        | 845 | Cross-sectional study | Bergen Insomnia Scale              | Sleep disorder (insomnia) | A positive correlation was found between COVID-19 Fear Scale and the Bergen Insomnia Scale ( $r = .392$ ; $p = .001$ ). The relationship between COVID-19 Fear and Bergen Insomnia Scale score averages and nurses' educational status, income level, shift working status, the status of their relatives being diagnosed with COVID-19, the state of being satisfied with the management of the pandemic process by the Ministry of Health, the situation of having resources in the settings where they work, the status of being in quarantine was statistically significant ( $p < .05$ ). |
| Aydin Sayilan et al., 2021 | Turkey | 267 nurses<br>The mean age of the nurses in this study was $28.03 \pm 5.99$ y (min: 21; max: 51), 75.3% were female, 63.3% were single, and 72.7% held an undergraduate degree.                                                                                           | 267 | Cross-sectional study | The Pittsburgh Sleep Quality Index | Sleep quality             | Nurses mostly experienced emotional exhaustion, and burnout levels increased in line with insomnia.                                                                                                                                                                                                                                                                                                                                                                                                                                                                                            |
| Åzahin et al., 2020        | Turkey | Six hundred twenty (66.0%) of the 939 HCWs taking part in this study were female, 339 (36.1%) were aged 26–30, 617 (65.7%) were married, 580 (61.8%) were physicians, 820 (87.3%) were working in an urban area, and 529 (56.3%) had been working for less than 10 years. | 939 | Cross-sectional study | Insomnia Severity Index            | Sleep disorder (insomnia) | 473 (50.4%) experienced insomnia symptoms<br>Female gender, having tested for COVID-19, and history of psychiatric illness emerged as risk factors for insomnia.<br>Nurses and frontline workers had a significantly higher insomnia score than other groups.                                                                                                                                                                                                                                                                                                                                  |
| Badahdah et                | Oman   | Examined sleep quality in                                                                                                                                                                                                                                                 | 150 | Cross-                | Sleep Quality                      | Sleep quality             | HCWs who scored 10 or higher on the 7-item                                                                                                                                                                                                                                                                                                                                                                                                                                                                                                                                                     |

|                     |        |                                                                                                                                                                                                                             |     |                       |                                |                                 |                                                                                                                                                                                                                                                                                                |
|---------------------|--------|-----------------------------------------------------------------------------------------------------------------------------------------------------------------------------------------------------------------------------|-----|-----------------------|--------------------------------|---------------------------------|------------------------------------------------------------------------------------------------------------------------------------------------------------------------------------------------------------------------------------------------------------------------------------------------|
| al., 2020           |        | a sample of 150 physicians (39.3%) and nurses (60.7%) who cared for patients with COVID-19 in Oman. Females made up 77.3% of participants. The average age was 37.62 years (standard deviation [SD] = 7.79 years).          |     | sectional study       | Scale                          |                                 | Generalized Anxiety Disorder Scale scored lower on sleep quality (mean = 5.98, SD = 2.29)<br>HCWs who scored less than 50 on the WHO-5 had a lower score on sleep quality (mean = 6.29, SD = 2.08)<br>The mean SQS score of 7 indicates that 40.1% of participants had poor sleep quality      |
| Barut et al., 2021  | Turkey | There were 213 volunteers in of a healthcare team providing service for COVID-19 patients, females 60.9%.<br>163 healthcare team working without direct contact with COVID-19 patients, females 47.5%.                      | 379 | Cross-sectional study | Jenkins Sleep Scale            | Sleep quality<br>Sleep problems | Sleep problems and stress levels were significantly higher among healthcare professionals who had direct contact with COVID-19 (+) patients compared to those who did not (P<0.05).                                                                                                            |
| Bilgiç et al., 2021 | Turkey | The average age of the nurses in this study was 32.24±8.41 years (min: 19; max: 56) and the average years worked was 10.31±9.08 years. 84.9%of the nurses were female, 50.0%were married, and 74.9%had a bachelor's degree. | 316 | Cross-sectional study | Pittsburgh Sleep Quality Index | Sleep quality                   | It was found that the average PSQI score of the nurses was 7.36±3.35 (min=1, max=20) a positively significant correlation was found between the average PSQI score of nurses and the PSS score. These findings suggest that nurses perceive high levels of stress and have poor sleep quality. |
| Bulut et al., 2021  | Turkey | Of the 348 healthcare professionals, 176 (50.6%) were women and 172 (49.4%) men, while 190 (54.6%) were doctors and 158 (45.4%) nurses. And 350 participants in the control group, 163 women (46.9%) and 186                | 698 | Cross-sectional study | Insomnia Severity Index        | Sleep disorder (insomnia)       | Healthcare professionals: 44 had insomnia (%12.6)<br>Nonhealthcare professionals: 45 had insomnia (%12.9)<br>Insomnia were found to be statistically significantly higher amongst those working in the "area of final diagnosis" (P = .002)                                                    |

|                   |      |                                                                                                                                                                                                                                                                                                                                                                                                                                                                                                                                                                                                                                                                                                                                                                                                                                                                                                                                          |      |                       |                         |                           |                                                                                                                                                                                                                                                                                               |
|-------------------|------|------------------------------------------------------------------------------------------------------------------------------------------------------------------------------------------------------------------------------------------------------------------------------------------------------------------------------------------------------------------------------------------------------------------------------------------------------------------------------------------------------------------------------------------------------------------------------------------------------------------------------------------------------------------------------------------------------------------------------------------------------------------------------------------------------------------------------------------------------------------------------------------------------------------------------------------|------|-----------------------|-------------------------|---------------------------|-----------------------------------------------------------------------------------------------------------------------------------------------------------------------------------------------------------------------------------------------------------------------------------------------|
|                   |      | men (53.1%)                                                                                                                                                                                                                                                                                                                                                                                                                                                                                                                                                                                                                                                                                                                                                                                                                                                                                                                              |      |                       |                         |                           |                                                                                                                                                                                                                                                                                               |
| Chan et al., 2021 | Oman | <p>A total of 1132 participants returned their completed questionnaire. A two-step cluster analysis was used to split the sample into three clusters. Clusters A, B and C contained 416 (36.7%), 412 (36.4%) and 304 (26.9%) HCWs, respectively. Cluster A was characterized by HCWs who were older (Mean <math>\pm</math> SD, 37.3 <math>\pm</math> 7.0 years) with more working experience (13.6 <math>\pm</math> 7.1 years) in the health-care setting. more than 84% (n = 353) had not handled any COVID-19 cases during the pandemic period. Cluster B was mostly around 36 years of age (SD = 6.3). The majority were physicians (43.4%, n = 179) or nurses (42.5%, n = 175) All were working in the frontline, and more than 60% (n = 257) had experienced COVID-19 cases in the pandemic. In Cluster C, most HCWs were nurses (44.1%, n = 134) and working in the tertiary care hospital (44.4%, n = 135). They were younger</p> | 1132 | Cross-sectional study | Insomnia Severity Index | Sleep disorder (insomnia) | <p>Cluster A: The majority did not report any symptoms of clinical insomnia (97.6%, n = 406)<br/> Cluster B: The majority did not report any symptoms of clinical insomnia (96.6%, n = 398)<br/> Cluster C: The majority reported clinical insomnia (60.2%, n = 183) during the pandemic.</p> |

|                           |        |                                                                                                                                                                                                                                                                   |      |                       |                                                                                     |                           |                                                                                                                                                                                                                                                                                                                                                                                                                                                                                                                                                                                                             |
|---------------------------|--------|-------------------------------------------------------------------------------------------------------------------------------------------------------------------------------------------------------------------------------------------------------------------|------|-----------------------|-------------------------------------------------------------------------------------|---------------------------|-------------------------------------------------------------------------------------------------------------------------------------------------------------------------------------------------------------------------------------------------------------------------------------------------------------------------------------------------------------------------------------------------------------------------------------------------------------------------------------------------------------------------------------------------------------------------------------------------------------|
|                           |        | (34.8 ± 5.7 years) and with less working experience (11.9 ± 5.9 years) There were around 50% (n = 159) working in the frontline only.                                                                                                                             |      |                       |                                                                                     |                           |                                                                                                                                                                                                                                                                                                                                                                                                                                                                                                                                                                                                             |
| Dolev et al., 2021        | Israel | Medical residents treating COVID-19: 20 internal medicine physicians, 7 physicians working in emergency departments. The non-COVID group: 31 internal medicine, 16 physicians working in emergency departments, 8 psychiatrists, 16 gynecologists, and 7 surgeons | 105  | Cohort study          | Pittsburgh Sleep Quality Index (PSQI)                                               | Sleep quality             | COVID-19 group had longer sleep duration (95% CI: COVID-19: 1.44–1.94 vs non-COVID-19: 0.15–0.37; U (27,64) = 313.00, P < 0.0001), longer sleep onset latency (95% CI: COVID-19: 1.75–2.01 vs non-COVID-19: 0.68–0.94; U (27,64) = 326.50, P < 0.0001), deteriorated daily function (95% CI: COVID-19: 2.54–2.91 vs non-COVID-19: 1.28–1.60; U(27,64) = 143.00, P < 0.0001), poorer sleep quality (95% CI: COVID-19: 2.75–3.01 vs non-COVID-19: 1.74–2.10; U(27,64) = 258.00, P < 0.0001), and worse global PSQI score (95% CI: COVID-19: 9.97–11.25 vs non-COVID-19: 4.57–5.27; t(89) = 9.751, P < 0.0001) |
| Durmaz Engin et al., 2021 | Turkey | 360 actively working ophthalmologists. While 64% of them worked in the pandemic hospitals, 44% were actively involved in COVID-related departments.                                                                                                               | 360  | Cross-sectional study | Insomnia Severity Index                                                             | Sleep disorder (insomnia) | Symptoms of insomnia were present in 46.9% of participants. Ophthalmologists working in a pandemic hospital were more likely to experience insomnia. Higher insomnia scores in female responders (p=0.002) and in those with a chronic disease (p=0.004). Higher levels of satisfaction with the hygiene conditions in COVID and the ophthalmology clinics lower ISI scores (p=0.004)                                                                                                                                                                                                                       |
| Elghazally et al., 2021   | Egypt  | Sample included 2331 physicians; 1177 of whom worked in front line hospitals (group II) and the remaining 1154 physicians (group I) in other health facilities (second line). The mean age of the participants is 34.3 ± 6.1                                      | 2331 | Cross-sectional study | Survey items developed by the study's author including questions on sleep duration. | Sleep duration            | In group I and group II (45.1% and 40.1% respectively) were at risk of falling or staying asleep or sleeping excessively.                                                                                                                                                                                                                                                                                                                                                                                                                                                                                   |

|                       |        |                                                                                                                                                                                                                                                                                                             |     |                       |                                                                                     |                           |                                                                                                                                                                                                                                                                                                                                        |
|-----------------------|--------|-------------------------------------------------------------------------------------------------------------------------------------------------------------------------------------------------------------------------------------------------------------------------------------------------------------|-----|-----------------------|-------------------------------------------------------------------------------------|---------------------------|----------------------------------------------------------------------------------------------------------------------------------------------------------------------------------------------------------------------------------------------------------------------------------------------------------------------------------------|
|                       |        | years. The majority of participants in group I and group II were in age group between 30 and 40 years (70.6% and 55%, respectively). In both groups, the majority of participants were females, married, urban dwellers, and specialists                                                                    |     |                       |                                                                                     |                           |                                                                                                                                                                                                                                                                                                                                        |
| Elgohary et al., 2021 | Egypt  | 270 health care workers (HCWs). The studied group age ranged from 18 to 52 years with mean $34.98 \pm 6.27$ years. 57% of HCWs were female. More than 72% of them had post-graduate education. Most frequent occupations among the participants were physicians and nurses (70.7% and 16.3%, respectively). | 270 | Cross-sectional study | Survey items developed by the study's author including questions on sleep duration. | Sleep duration            | There was a statistical significant decrease in sleep hours among HCWs with severe and extremely severe depression.                                                                                                                                                                                                                    |
| Elkholy et al., 2021  | Egypt  | 502 HCW dealing with COVID-19 in 20 hospitals in different parts of egypt; 60.0% were physicians, 16.1% were specialized nurses, and 23.9% were non-specialized nurses. About 35.3% worked in chest hospitals, 17.5% in fever hospitals, and 47.2% in quarantine hospitals.                                 | 502 | Cross-sectional study | Insomnia Severity Index                                                             | Sleep disorder (insomnia) | According to the insomnia severity scale 320 (67.7%) showed positive results; 195 (41.2%) were sub-threshold, 101 (21.4%) were moderate and 24 (5.1%) were severe. Participants with age group (31–40) were at higher risk of severe insomnia compared to those with >40 years old participants (OR, 2.79; 95% CI, 1.02–7.66; p = .01) |
| Hawari et al., 2021   | Jordan | 937 practitioners (56.1% females). Approximately 68%, 14%, and 18% were nurses/technicians,                                                                                                                                                                                                                 | 937 | Cross-sectional study | Survey items developed by the study's author including                              | Sleep quality             | Sleep disturbances were reported (in past seven days) by approximately 29% of subjects.                                                                                                                                                                                                                                                |

|                        |         |                                                                                                                                                                                                               |     |                       |                                    |                           |                                                                                                                                                                                                                                                                                                                                                                                                                                                                                                                                   |
|------------------------|---------|---------------------------------------------------------------------------------------------------------------------------------------------------------------------------------------------------------------|-----|-----------------------|------------------------------------|---------------------------|-----------------------------------------------------------------------------------------------------------------------------------------------------------------------------------------------------------------------------------------------------------------------------------------------------------------------------------------------------------------------------------------------------------------------------------------------------------------------------------------------------------------------------------|
|                        |         | physicians, and pharmacists (respectively).                                                                                                                                                                   |     |                       | questions on sleep-related issues. |                           |                                                                                                                                                                                                                                                                                                                                                                                                                                                                                                                                   |
| Jahrami et al., 2021   | Bahrain | A total of 257 participants (129 FLHCW and 128 NFLHCW)                                                                                                                                                        | 280 | Cross-sectional study | Pittsburgh Sleep Quality Index     | Sleep quality             | The FLHCW scored higher in the PSQI and PSS compared with the NFLHCW; however, the difference in the PSQI score was not statistically significant.<br>For the FLHCW, 75% were poor sleepers, 85% had moderate-severe stress, and 61% had both poor sleep quality and moderate-severe stress. For the NFLHCW, 76% were poor sleepers, 84% had moderate-severe stress, and 62% had both poor sleep quality and moderate-severe stress. Female sex and professional background were the predictors of poor sleep quality and stress. |
| Kandemir et al., 2022  | Turkey  | The study was performed with 194 nurses working in the intensive care units of five hospitals in Istanbul.                                                                                                    | 194 | Cross-sectional study | Insomnia Severity Index            | Sleep disorder (insomnia) | 39.7% of the nurses experienced moderate (21.6%) or severe insomnia (18.1%).                                                                                                                                                                                                                                                                                                                                                                                                                                                      |
| Karabulut et al., 2021 | Turkey  | 210 health care professionals working in ICUs were included in the study. Of the participants, 159 (75.4%) were female, and 185 (88.1%) were nurses. The mean age of the participants was 27.04 ± 5.71 years. | 210 | Cross-sectional study | Visual analog sleep scale          | Sleep quality             | a positive relationship was found between state anxiety and sleep ( $r = 0.158$ , $p = 0.022$ )<br><br>The mean perceived visual analog sleep score was moderate and found as 503.79 ± 134.24                                                                                                                                                                                                                                                                                                                                     |
| Khamis et al., 2020    | Oman    | 402 female doctors and nurses recruited from several health facilities in Oman.<br>A total of 231 (57.5%) Omanis and 171 (42.5%) non-Omanis participated in this study. Of the total 402 participants, 28.4%  | 402 | Cross-sectional study | Sleep Quality Scale                | Sleep quality             | 39.3% had poor sleep quality; this was particularly prevalent among Omanis.<br>A multiple regression analysis revealed that anxiety, stress, and well-being were significant predictors of poor sleep quality.                                                                                                                                                                                                                                                                                                                    |

|                      |              |                                                                                                                                                                                                                                                                                                                        |      |                                |                                                                                            |                            |                                                                                                                                                                                                                                                                                                                                                                                                                                                                                                                                                                                                                    |
|----------------------|--------------|------------------------------------------------------------------------------------------------------------------------------------------------------------------------------------------------------------------------------------------------------------------------------------------------------------------------|------|--------------------------------|--------------------------------------------------------------------------------------------|----------------------------|--------------------------------------------------------------------------------------------------------------------------------------------------------------------------------------------------------------------------------------------------------------------------------------------------------------------------------------------------------------------------------------------------------------------------------------------------------------------------------------------------------------------------------------------------------------------------------------------------------------------|
|                      |              | were physicians and 71.6% were nurses. One in four (27.9%) participants reported caring for COVID-19 patients                                                                                                                                                                                                          |      |                                |                                                                                            |                            |                                                                                                                                                                                                                                                                                                                                                                                                                                                                                                                                                                                                                    |
| Meo et al., 2021     | Saudi Arabia | HCWs: 859 (51.2%) females, and 819 (48.8%) males                                                                                                                                                                                                                                                                       | 1678 | Observational-analytical study | Pittsburgh Sleep Quality Index (PSQI)                                                      | Sleep quality              | 1376 (82.0%) of the HCWs had poor sleep quality ( $\geq 5$ global PSQI score). The results show that 975 (58.10%) were frontline HCWs, and 407 (23.89%) were second-line HCWs who suffered from poor sleep quality. The highest poor sleep quality levels were identified among HCWs who work in frontline areas (emergency departments, intensive care units, and wards) (642 (84.6%)), in comparison with others who work in second-line areas (734 (79.9%)). 585 (85.7%) HCWs directly involved were suffering from poor sleep quality in comparison with 791 (79.5%) non-directly involved healthcare workers. |
| Mosheva et al., 2020 | Israel       | 1106 Israeli physicians (564 males and 542 females) during the COVID-19 outbreak.                                                                                                                                                                                                                                      | 1106 | Cross-sectional study          | Survey items developed by the study's author including questions on sleeping difficulties. |                            | Found a positive association between sleep difficulties and higher levels of anxiety among physicians.<br><br>Sleeping difficulties score (1.81/5) $\pm$ 0.88                                                                                                                                                                                                                                                                                                                                                                                                                                                      |
| Mousavi et al., 2021 | Iran         | 321 HCWs from major tertiary hospitals in Isfahan which were dedicated to COVID-19 patients. The mean age of participants was 33.5 years (SD: 7.65, range: 23–65). The mean of working experience in our study sample was 6.7 years (SD: 6.20, range: 1–30). In the study sample, 236 (73.8%) participants were female | 321  | Cross-sectional study          | Insomnia Severity Index                                                                    | Sleep disorders (insomnia) | The mean score of ISI was 10.3 (SD: 5.95, range: 0–25), and just 123 (38.8%) participants had normal sleep.<br><br>The Pearson correlation analysis revealed that there is a statistically significant correlation between GHQ-12 and age (r: -0.12, P: 0.02), working year (r: -0.12, P: 0.03), ISI score (r: 0.56, P: 0.000), and social support score (r: -0.27, P: 0.000)                                                                                                                                                                                                                                      |



|                        |        |                                                                                                                                                                                                                                                                                                            |     |                       |                         |                           |                                                                                                                                                                                                                                                                                                                                                                                                                                                                                                                |
|------------------------|--------|------------------------------------------------------------------------------------------------------------------------------------------------------------------------------------------------------------------------------------------------------------------------------------------------------------|-----|-----------------------|-------------------------|---------------------------|----------------------------------------------------------------------------------------------------------------------------------------------------------------------------------------------------------------------------------------------------------------------------------------------------------------------------------------------------------------------------------------------------------------------------------------------------------------------------------------------------------------|
|                        |        | and 156 (48.6%) of them were a nurse.                                                                                                                                                                                                                                                                      |     |                       |                         |                           |                                                                                                                                                                                                                                                                                                                                                                                                                                                                                                                |
| Nashwan et al., 2021   | Qatar  | A total of 200 nurses participated in the study (response rate 13.3%). About 74.5% of nurses were working in COVID-19 facilities. Around 19.0%, 65.5%, and 15.5% of nurses were aged 20–30, 31–40, and above 40 years, respectively. About 59.5% and 80.0% of nurses were males and married, respectively. | 200 | Cross-sectional study | Insomnia Severity Index | Sleep disorder (insomnia) | In this study, there were no significant differences in sleep quality, stress, anxiety, depression, and perceived social support between nurses working in COVID-19 and non-COVID-19 facilities in Qatar                                                                                                                                                                                                                                                                                                       |
| Oteir et al., 2022     | Jordan | A total of 122 HCWs participated in the study (response rate=64.2%). Among the participants, 44.3% were physicians, 32.8% were nurses and 17.2% were paramedics. The mean age of participants was 32.1 (±5.8) years, and the majority were males (80.3%)                                                   | 122 | Cross-sectional study | Insomnia Severity Index | Sleep disorder (insomnia) | insomnia (31.9%), with increased severity of insomnia among paramedics<br><br>Mean score of ISI was 11.2 (±6.4)                                                                                                                                                                                                                                                                                                                                                                                                |
| Sis Çelik et al., 2021 | Turkey | 211 nurses using a web-based online survey in Turkey (including 104 nurses working in wards where patients with COVID-19/107 nurses working in wards where patients without COVID-19).<br><br>It was determined that the average age                                                                       | 211 | Cross-sectional study | Post-Sleep Inventory    | Sleep disorders           | it was found that 31.8% of the Nurses involved in the study had very serious sleep problem during the COVID-19 period, and 21.3% had a moderate problem<br><br>When the sleep problems experienced were compared according to the Post-Sleep Inventory, it was determined that the difference between the groups was not statistically significant (p>0.05). There was a moderately significant and positive correlation between the nurses' mean scores for the COVID-19 Fear Scale and Post-Sleep Inventory. |

|                  |        |                                                                                                                                                                                                                                          |     |                       |                                                                                  |               |                                                                                                                                                                                                                                                                                                                                                                                                                                                                                                                                                                                                                                                                                                                                                                                                                                                                                                                                                                                                                                                                                                                                                                                                                                                                              |
|------------------|--------|------------------------------------------------------------------------------------------------------------------------------------------------------------------------------------------------------------------------------------------|-----|-----------------------|----------------------------------------------------------------------------------|---------------|------------------------------------------------------------------------------------------------------------------------------------------------------------------------------------------------------------------------------------------------------------------------------------------------------------------------------------------------------------------------------------------------------------------------------------------------------------------------------------------------------------------------------------------------------------------------------------------------------------------------------------------------------------------------------------------------------------------------------------------------------------------------------------------------------------------------------------------------------------------------------------------------------------------------------------------------------------------------------------------------------------------------------------------------------------------------------------------------------------------------------------------------------------------------------------------------------------------------------------------------------------------------------|
|                  |        | <p>of the nurses working in wards where patients with COVID-19 are hospitalized was 29.04±6.42.</p> <p>It was determined that the average age of nurses working in wards where patients without COVID-19 are admitted was 26.22±4.89</p> |     |                       |                                                                                  |               |                                                                                                                                                                                                                                                                                                                                                                                                                                                                                                                                                                                                                                                                                                                                                                                                                                                                                                                                                                                                                                                                                                                                                                                                                                                                              |
| Taş et al., 2021 | Turkey | 448 Family Physicians participated in the study. The average age of the participants in the study was 39.10 ± 9.59 (min 24, max 65).                                                                                                     | 448 | Cross-sectional study | Survey items developed by the study's author include questions on sleep quality. | Sleep quality | <p>While the rate of family physicians who evaluated sleep quality as very poor before the onset of the pandemic was 1.3% (n = 6), this rate increased to 13.8% during the pandemic process (n = 62). While the rate of those who reported sleep quality as poor before the pandemic was 12.7% (n = 57), this rate increased to 48.2% (n = 216) after the pandemic. While 65.4% (n = 293) of the family physicians participating in the study defined sleep quality as good before the pandemic, this rate decreased to 35.7% (n = 160) after the pandemic. While the rate of those who stated that the quality of sleep before pandemic was very good was 20.5% (n = 92), this rate decreased to 2.2% (n = 10) after the pandemic (p &lt; 0.001).</p> <p>Thinking that personal protective measures were insufficient (p = 0.000) and working as a practitioner as a professional title were the most important factors affecting the deterioration of sleep quality (p = 0.004). Age, gender, marital status, having a child, the institution of employment, the years spent in the profession, and having contact history with Covid-19 positive cases were not effective in impairing sleep quality (p &gt; 0.05).</p> <p>Family physicians whose workload dimension</p> |

|                                 |        |                                                                                                                                                                                                                                                                                                                            |     |                       |                                |                           |                                                                                                                                                                                                                                                                                                                                                                                                                                                                                                                                                                                                                                                                                                                                |
|---------------------------------|--------|----------------------------------------------------------------------------------------------------------------------------------------------------------------------------------------------------------------------------------------------------------------------------------------------------------------------------|-----|-----------------------|--------------------------------|---------------------------|--------------------------------------------------------------------------------------------------------------------------------------------------------------------------------------------------------------------------------------------------------------------------------------------------------------------------------------------------------------------------------------------------------------------------------------------------------------------------------------------------------------------------------------------------------------------------------------------------------------------------------------------------------------------------------------------------------------------------------|
|                                 |        |                                                                                                                                                                                                                                                                                                                            |     |                       |                                |                           | increased were the family physicians whose sleep quality deteriorated during the pandemic (p = 0.000).                                                                                                                                                                                                                                                                                                                                                                                                                                                                                                                                                                                                                         |
| Tasdemir Yigitoglu et al., 2021 | Turkey | 435 healthcare staff members. Their mean age turned out to be 36.76 ± 7.58. Slightly more than half of the participants were women (56.1%, n = 244), whereas 67.8% (n = 295) were married and 66.9% (n = 291) were parents.                                                                                                | 435 | Cross-sectional study | Pittsburg Sleep Quality Index  | Sleep quality             | <p>Their mean PSQI score was 8.42 ± 2.30, and poor sleep quality was identified in an overwhelming majority of the healthcare staff (92.9%, n = 404).</p> <p>As for the sleep quality scores derived from the PSQI data, strong evidence was found for the within-group differences in terms of gender (female healthcare staff suffer from poorer sleep quality), parenthood (poor sleep quality in the enrolled healthcare staff with children), years of experience in the current department, health-related problems, history of mental disorders, and job satisfaction (p &lt; 0.05)</p>                                                                                                                                 |
| Yilmaz et al., 2021             | Turkey | Four hundred thirty-four healthcare workers participated in the study, of whom 70.7% were under 35 years of age, 65.0% were female, 60.6% were married, 64.1% were physicians, 56.7% held a master's degree or above, 73.0% worked in a hospital, 50% worked on the frontline and 36.4% had 5-10 years' working experience | 278 | Cross-sectional study | Pittsburgh Sleep Quality Index | Sleep quality             | <p>The total prevalence of poor sleep quality was 56.7%</p> <p>The prevalence of poor sleep quality was 67.3% in nurses, 55.4% in physicians and 42.3% in dentists. Poor sleep quality was more prevalent among women, nurses, hospital workers, frontline workers, individuals with &lt;5 years of work experience, those with low social support and individuals with increased traumatic stress levels. High levels of social support and family social support were identified as protective factors against poor sleep quality. Multivariate regression analyses showed that poor sleep quality was significantly associated with working in hospitals and high traumatic stress levels during the COVID-19 pandemic.</p> |
| Yilmaz et al., 2021             | Turkey | 600 Healthcare workers participated in this study. 364 were females and 236 were males with a mean age of 33.49 ± 7.29 years.                                                                                                                                                                                              | 600 | Cross-sectional study | Insomnia Severity Index        | Sleep disorder (insomnia) | <p>Mean ISI score was significantly higher among HCWs working in COVID-19 clinics and intensive care units (p=0.000; p=0.039). Mean ISI score was significantly higher in women than men (p=0.000; p=0.000; p=0.027; p=0.005).</p> <p>Mean ISI scores was significantly higher among nurses (p=0.008; p=0.004).</p>                                                                                                                                                                                                                                                                                                                                                                                                            |
| Youssef et al., 2020            | Egypt  | 540 healthcare professionals                                                                                                                                                                                                                                                                                               | 540 | Cross-sectional       | Insomnia Severity Index        | Sleep disorder (insomnia) | Just over one half of respondents (51.9%, n=280) reported sub-threshold insomnia to                                                                                                                                                                                                                                                                                                                                                                                                                                                                                                                                                                                                                                            |

|                      |         |                                                                                                                                                                                                                                                                                      |     |                       |                                |               |                                                                                                                                                                                                                                                                                                                                                                                                                                                                                                                                                                                                                                                                                                                                                                                                                                                                                                                                                                                                                                                                                                                                          |
|----------------------|---------|--------------------------------------------------------------------------------------------------------------------------------------------------------------------------------------------------------------------------------------------------------------------------------------|-----|-----------------------|--------------------------------|---------------|------------------------------------------------------------------------------------------------------------------------------------------------------------------------------------------------------------------------------------------------------------------------------------------------------------------------------------------------------------------------------------------------------------------------------------------------------------------------------------------------------------------------------------------------------------------------------------------------------------------------------------------------------------------------------------------------------------------------------------------------------------------------------------------------------------------------------------------------------------------------------------------------------------------------------------------------------------------------------------------------------------------------------------------------------------------------------------------------------------------------------------------|
|                      |         | <p>participated; their ages ranged from 20 to 70 years, with a mean of 37.3 (SD=9.2). The majority were male (54.4%, n=294), highly educated (postgraduate) (78.3%, n=423), physicians (77%, n=416), married (74.1%, n=400), had experience of five years or more (77.8%, n=420)</p> |     | study                 |                                |               | <p>severe insomnia. The quarantine group and the non-quarantine group had an insignificant difference in adverse psychological symptoms and insomnia.</p> <p>Insomnia was high among those who reported experiencing stress, depression and anxiety (P&lt;0.001).</p>                                                                                                                                                                                                                                                                                                                                                                                                                                                                                                                                                                                                                                                                                                                                                                                                                                                                    |
| Zarzour et al., 2021 | Lebanon | <p>A total of 628 healthcare workers completed the survey; 409 (66.2%) were younger than 40 years, and 441 (71.4%) were women. Of all participants, 503 (81.4%) were nurses, 52 (8.4%) were physicians and 63 (10.2%) were residents.</p>                                            | 628 | Cross-sectional study | Pittsburgh Sleep Quality Index | Sleep quality | <p>The mean (SD) scores on the PSQI for sleep quality for all respondents was 6.0 (3.7). 48.4% were "poor sleepers" as they got PSQI scores higher than 5.</p> <p>Participants who were aged more than 50 had lower sleep quality scores than those aged between 41 and 50 and significantly lower scores than those younger than 40 (P = 0.005 (PSQI))</p> <p>Residents had significantly higher sleep disturbances scores than practical nurses (P = 0.016). Registered nurses compared to physicians and practical nurses had significantly higher sleep quality scores ( P &lt; 0.001)</p> <p>Participants who reported having relatives or friends who got infected or quarantined had higher sleep disturbances scores than those who had not ( P = 0.019 for PSQI).</p> <p>Participants who were exposed to COVID-19 related media for more than 2 hours per day, had poorer sleep quality (P = 0.011) than those who were exposed to media less than 2 hours per day and to those who were not exposed at all.</p> <p>Greater number of stress sources was positively correlated to higher sleep disturbances ( r = 0.129, P</p> |

|  |  |  |  |  |  |  |                                                                                                                                                                                                                                                                                                                                                 |
|--|--|--|--|--|--|--|-------------------------------------------------------------------------------------------------------------------------------------------------------------------------------------------------------------------------------------------------------------------------------------------------------------------------------------------------|
|  |  |  |  |  |  |  | <p>= 0.001, respectively)</p> <p>Participants were asked whether they were still able to practice the strategies they normally use to deal with stress. Those who were still able to do it (60.4%) had lower anxiety and significantly lower sleep disturbances scores than those who were not (P = 0.096 for STAI and P = 0.011 for PSQI).</p> |
|--|--|--|--|--|--|--|-------------------------------------------------------------------------------------------------------------------------------------------------------------------------------------------------------------------------------------------------------------------------------------------------------------------------------------------------|

| Students            |                   |                                                                                                                                                                                                                                             |             |                       |                                                       |                                                    |                                                                                                                                                                                                                                                                                         |
|---------------------|-------------------|---------------------------------------------------------------------------------------------------------------------------------------------------------------------------------------------------------------------------------------------|-------------|-----------------------|-------------------------------------------------------|----------------------------------------------------|-----------------------------------------------------------------------------------------------------------------------------------------------------------------------------------------------------------------------------------------------------------------------------------------|
| Reference           | Location of Study | Population                                                                                                                                                                                                                                  | Sample Size | Study Design          | Sleep Health Measurement Tool                         | Sleep Health Domains                               | Main Findings                                                                                                                                                                                                                                                                           |
| Al Mukhaini et al., | Oman              | 376 Omani students who had returned to Oman from abroad due to the COVID19 pandemic. 255 male (67.8%) and 121 female (32.2%) participants. The mean age of the participants was 21.7 years old (SD = 3.8), ranging from 18 to 45 years old. | 376         | Cross-sectional study | Athens insomnia scale                                 | Sleep problems (insomnia scale)                    | 49.5% (n = 186) noted to be suffering from insomnia. Female students were 2.4 times (OR = 2.43; CI: 1.50–3.93; P < .001) more likely to be insomniac compared to male students. The risk of insomnia may be less in the subjects going for a walk (OR = 0.29; CI: 0.12–0.69; P = 0.008) |
| Ali et al., 2021    | Lebanon           | 510 secondary level school students from grades 9–12 participated in this online survey. Among these, 382 (74.9%) were females, and there was no significant difference in age between male and female students.                            | 510         | Cross-sectional study | Insomnia Severity Index Bedtime Procrastination Scale | Sleep disorder (Insomnia, bedtime procrastination) | Screen time of more than seven hours per day was significantly associated with insomnia (82%), and bedtime procrastination.                                                                                                                                                             |

|                         |              |                                                                                                                                                                                                                                                                                                                    |     |                       |                                                                                    |                                                              |                                                                                                                                                                                                                                                                                                                                                                                                                                                                                                                                                                                                                                                                                                                                                                                                                                                                                               |
|-------------------------|--------------|--------------------------------------------------------------------------------------------------------------------------------------------------------------------------------------------------------------------------------------------------------------------------------------------------------------------|-----|-----------------------|------------------------------------------------------------------------------------|--------------------------------------------------------------|-----------------------------------------------------------------------------------------------------------------------------------------------------------------------------------------------------------------------------------------------------------------------------------------------------------------------------------------------------------------------------------------------------------------------------------------------------------------------------------------------------------------------------------------------------------------------------------------------------------------------------------------------------------------------------------------------------------------------------------------------------------------------------------------------------------------------------------------------------------------------------------------------|
| Alrashed et al., 2021   | Saudi Arabia | Total number of participants was 453 from 3rd to 5th medical year, and intern medical students.                                                                                                                                                                                                                    | 453 | Cross-sectional study | Insomnia Severity Index                                                            | Sleep problems (insomnia)                                    | 162 (34.9%) of the participants had insomnia symptoms, among them 57.4% of females and 42.6% of males have insomnia. Participants with an age group between 22 and 25 have more sleep issues (43.2%) as compared to other age groups. 3rd-year students have more insomnia 36.41% as compared to other years. The age group 30 and above have a high prevalence of insomnia (OR = 1.67; P = 0.26), followed by the age group 26–29 (OR = 1.40; P = 0.19) Those who have a severe level of stress have ~3 times higher prevalence of insomnia (OR = 2.81; P = 0.0008), followed by a moderate level of stress (OR = 1.50; P = 0.15) Those who were involved in religious practices have less sleep problems. Similarly, those who have mentally accepted the current COVID situation also have less sleep problems (P = 0.0001) as compared to those who did not accept the current situation. |
| Alshammari et al., 2021 | Saudi Arabia | 186 replies were received from professional pharmacy students . Female students accounted for 64.5 percent of the total, which is in line with their general ratio in the Pharm.D. Program. The second professional year had the most participants (25.8%), while the sixth professional year had the least (7.0%) | 186 | Cross-sectional study | Survey items developed by the study's author including questions on sleep quality. | Sleep quality                                                | "Discovered that practically all students were plagued by symptoms of sadness, anxiety, tension, and poor sleep quality"                                                                                                                                                                                                                                                                                                                                                                                                                                                                                                                                                                                                                                                                                                                                                                      |
| Alyoubi et al., 2021    | Saudi Arabia | A total of 582 undergraduate students. 73% were female and 25% were male. The majority (78%) of undergraduate students                                                                                                                                                                                             | 582 | Cross-sectional study | Insomnia Severity Index                                                            | Sleep duration<br>Sleep quality<br>Sleep disorder (insomnia) | Over one-third of students reported that sleep had been impacted and worsened during the pandemic. 22% having trouble falling asleep, 17.9% waking up during the night, 8.8% waking up early in the morning, 25.9% have poor sleep quality, 22.7% feeling tired during the day, 9.3% have nightmares                                                                                                                                                                                                                                                                                                                                                                                                                                                                                                                                                                                          |

|                         |        |                                                                                                                                                                                    |     |                       |                                |                           |                                                                                                                                                                                                                                                                                                                                                                                                                                                                                                                                                                                                                                                                                                                                                                                                                                                                                                                                                                                                             |
|-------------------------|--------|------------------------------------------------------------------------------------------------------------------------------------------------------------------------------------|-----|-----------------------|--------------------------------|---------------------------|-------------------------------------------------------------------------------------------------------------------------------------------------------------------------------------------------------------------------------------------------------------------------------------------------------------------------------------------------------------------------------------------------------------------------------------------------------------------------------------------------------------------------------------------------------------------------------------------------------------------------------------------------------------------------------------------------------------------------------------------------------------------------------------------------------------------------------------------------------------------------------------------------------------------------------------------------------------------------------------------------------------|
|                         |        | were enrolled at the King Abdulaziz University and 16% were studying at Jeddah University in Saudi Arabia.                                                                         |     |                       |                                |                           | and 5.2% have poor dreams<br>This study showed that over half of students reported sleep disruption and 1.4% were taking melatonin supplements for the sleep problem. A small percentage (4.3%) had very mild sleep problem, while 16% reported a mild sleep problem, 21.8% moderate, 9.3% severe, and 1.2% very severe. There was no significant difference between older and younger students on the level of insomnia. Students reported a statistically high level of insomnia with a high level of depression, anxiety, perceived stress ( $p < 0.001$ ). Undergraduate students reported statistically more insomnia symptoms with a lower level of psychological resilience ( $r = -0.150, p < 0.001$ ). The level of insomnia was slightly higher for students who self-isolated<br>Students who received support from mental health services but had it stopped and offered online and declined before COVID-19 reported a significantly higher level of insomnia $F(5, 555) = 2.768, p = 0.018$ . |
| Bosi Bağcı et al., 2021 | Turkey | 340 interns accounting for 63.4 % of the target population completed the online questionnaire. Almost 60 % of the participants were composed of females and the mean age was 24.89 | 340 | Cross-sectional study | Pittsburgh Sleep Quality Index | Sleep quality             | Sleep quality during the COVID-19 compared to the pre-COVID-19 period was assessed and it was found that only 27.8 % of the interns observed no change in sleep quality. However, 38.6 % of the interns experienced an improvement and 33.6 % had a reduction in sleep quality. Then, the sleep quality of interns was evaluated with PSQI and 53.4 % of the students were found to have poor sleep quality during the COVID-19 period. The effect of gender on sleep quality was also evaluated and even though female students had a predilection towards poor sleep quality, there was no significant difference between genders ( $P = 0.075$ )                                                                                                                                                                                                                                                                                                                                                         |
| Cakmak et al., 2022     | Turkey | 564 students<br>The mean age of the participants was $28.13 \pm 0.49$ years (min: 18 / max: 90). While 71.1% of the participants were                                              | 564 | Cross-sectional study | Bergen Insomnia Scale          | Sleep disorder (insomnia) | The results revealed that 64.7% of the participants had insomnia. The findings suggest that there was no statistically significant difference between insomnia and age, educational attainment, smoking status, and who the participants lived during the quarantine ( $p > 0.05$ ).                                                                                                                                                                                                                                                                                                                                                                                                                                                                                                                                                                                                                                                                                                                        |

|                      |        |                                                                                                                                                                                                                                                                                                                                                             |        |                            |                                                                                                      |                                                               |                                                                                                                                                                                                                                                                                                                                                                                                                                                                              |
|----------------------|--------|-------------------------------------------------------------------------------------------------------------------------------------------------------------------------------------------------------------------------------------------------------------------------------------------------------------------------------------------------------------|--------|----------------------------|------------------------------------------------------------------------------------------------------|---------------------------------------------------------------|------------------------------------------------------------------------------------------------------------------------------------------------------------------------------------------------------------------------------------------------------------------------------------------------------------------------------------------------------------------------------------------------------------------------------------------------------------------------------|
|                      |        | female, 66.5% were single. It was found that 66.3% of the individuals were university students, and 82.8% did not have any chronic diseases.                                                                                                                                                                                                                |        |                            |                                                                                                      |                                                               | Those who used a phone or tablet before sleeping ( $p = 0.020$ ) were found to have significantly higher levels of insomnia than others. The mean days of uninterrupted home quarantine was higher for participants experiencing insomnia.                                                                                                                                                                                                                                   |
| Dalcali et al., 2021 | Turkey | mean age of students was $20.39 \pm 2.05$ years and 82% ( $n = 232$ ) were female, and 33.6% ( $n = 95$ ) were first-year students                                                                                                                                                                                                                          | 283    | Descriptive, correlational | Verran and Snyder-Halpern sleep scale (VAS)                                                          | sleep disturbance, effective sleep, daytime sleep             | Before COVID-19, 21.20% reported that their night sleep was interrupted, while during the COVID-19 period, this rate increased to 28.26% and this increase was considered to be statistically significant. There was a high-level positive significant correlation between students' sleep quality and state anxiety ( $r: 0.305$ , $p: 0.000^{**}$ ) and trait anxiety ( $r: 0.288$ ; $p: 0.000$ )                                                                          |
| Elakany et al., 2022 | Global | 3793 (22.3%) of students. 61.7% females and the mean age was 31.0 years ( $SD = 8.9$ )                                                                                                                                                                                                                                                                      | 17,008 | Cross-sectional study      | Online survey                                                                                        | changes in sleep pattern (sleeping more, less, or no changes) | 4,889 people (28.7%) reported change in sleep patterns. Compared to non-students, students had significantly higher odds of reporting changes in sleep ( $AOR = 1.52$ ; 95% CI: 1.39, 1.67). Participants from LICs and LMICs had lower odds of reporting changes in sleep ( $AOR = 0.74$ ; 95% CI: 0.58, 0.94 and $AOR = 0.67$ ; 95% CI: 0.61, 0.72). participants from UMICs, had significantly higher odds of reporting changes in sleep ( $AOR = 1.26$ ; 95% 1.15, 1.39) |
| Elsalem et al., 2020 | Jordan | 1019 students from Jordan University of Science and Technology agreed to participate in the study and completed the survey. Approximately, half of the participants were from Faculty of Medicine (51.32%), while the other half in descending order were students from Faculties of Nursing, Dentistry, Pharmacy and Applied Medical Sciences. Almost two- | 1019   | Cross-sectional study      | Survey items developed by the study's author include questions on sleep duration and sleep disorder. | Sleep duration. Sleep disorder (insomnia)                     | Student's experience of stress during exams was also found to be significantly associated with changes in sleeping hours. Among students who reported more stress with remote E-exams, 44.15% had reduction in their sleeping hours and 28.65% reported more consumption of medications to relief insomnia. Caffeine was mainly consumed to keep students more alert for exam preparation and was linked to loss of sleep during exams days                                  |



|                     |              |                                                                                                                                                                                                                                                             |      |                       |                                  |                                             |                                                                                                                                                                                                                                                                                                                                                                                                                                                                                                                                                                                                                                                                                                                                                                                     |
|---------------------|--------------|-------------------------------------------------------------------------------------------------------------------------------------------------------------------------------------------------------------------------------------------------------------|------|-----------------------|----------------------------------|---------------------------------------------|-------------------------------------------------------------------------------------------------------------------------------------------------------------------------------------------------------------------------------------------------------------------------------------------------------------------------------------------------------------------------------------------------------------------------------------------------------------------------------------------------------------------------------------------------------------------------------------------------------------------------------------------------------------------------------------------------------------------------------------------------------------------------------------|
|                     |              | thirds of the respondents (65.55%) were females.                                                                                                                                                                                                            |      |                       |                                  |                                             |                                                                                                                                                                                                                                                                                                                                                                                                                                                                                                                                                                                                                                                                                                                                                                                     |
| Göl et al., 2021    | Turkey       | 2630 nursing students. The mean age of students participating in the study was 21.30 ± 1.95 SD. The majority of them (82.1%) were female students and 11.4% had a chronic disease.                                                                          | 2630 | Cross-sectional study | GHQ-12                           | Sleep disorder (sleep pattern)              | Change in sleep pattern 62.9% (= 0.629)                                                                                                                                                                                                                                                                                                                                                                                                                                                                                                                                                                                                                                                                                                                                             |
| Goweda et al., 2020 | Saudi Arabia | 438 medical students were recruited from the second year to the sixth year among Umm Al-Qura University Faculty of Medicine. Half (50.5%) were female, nearly all (422, 96.3%) had a single marital status, and a minority (55, 12.6%) had chronic disease. | 438  | Cross-sectional study | Sleep-50 questionnaire           | Sleep disorders (narcolepsy, insomnia, CRD) | 323 (73.7%) of the participants complained of at least one sleep disorder. The most prevalent sleep disorder was Narcolepsy (NL) with 226 (51.6%), followed by 138 (31.5%) with insomnia, and 98 (22.4%) indicating Circadian Rhythm sleep Disorder (CRD)<br>87 (19.9%) of respondents positive for at least two combined sleep disorders, and 63 (14.4%) demonstrating three combined sleep disorders.<br><br>In the time students spent watching television and/or on smartphones, there was significant difference in students with sleep disorders (m=6.71 hours, SD=3.83) and those without (m=5.90 hours, SD=3.40) (p=0.004)<br><br>Significant relationship between gender and sleep disorder, with females more affected at 178 (80.5%) than males at 145 (66.8%) (p=0.001) |
| Grande et al., 2021 | Saudi Arabia | 152 nursing intern students were involved in this study. Among them, 73% are in the age of 20 years and below, while 23.7% are between 31 and 40 years of age, and 3.3% fall within the age range of 21–30 years old. In terms of gender,                   | 152  | Cross-sectional study | Quality of Life Evaluation Scale | Sleep quality                               | Sleep satisfaction score 1.99/5.00                                                                                                                                                                                                                                                                                                                                                                                                                                                                                                                                                                                                                                                                                                                                                  |

|                         |               |                                                                                                                                                                                                                                                                                                                                                   |      |                       |                                                                                      |                                       |                                                                                                                                                                                                                                                                                                                                                                                                                                                               |
|-------------------------|---------------|---------------------------------------------------------------------------------------------------------------------------------------------------------------------------------------------------------------------------------------------------------------------------------------------------------------------------------------------------|------|-----------------------|--------------------------------------------------------------------------------------|---------------------------------------|---------------------------------------------------------------------------------------------------------------------------------------------------------------------------------------------------------------------------------------------------------------------------------------------------------------------------------------------------------------------------------------------------------------------------------------------------------------|
|                         |               | 53.9% are males, and 46.1% are females.                                                                                                                                                                                                                                                                                                           |      |                       |                                                                                      |                                       |                                                                                                                                                                                                                                                                                                                                                                                                                                                               |
| Jalal et al., 2021      | Saudi Arabia  | 628 students studying bachelor's degree programs, between 18 and 30 years of age. 70.9% were female                                                                                                                                                                                                                                               | 628  | Cross-sectional study | Pittsburgh Sleep Quality Index                                                       | Sleep quality                         | Approximately, 188 (29.9%) students felt that sleep quality was good before lockdown, and 126 (20.1%) students felt the same during the lockdown. Moreover, the total sleeping time increased from 6.6 ± 2.3 hours per day to 8.3 ± 2.7 hours per day, which was also proved statistically significant (p = 0.001).                                                                                                                                           |
| Joseph et al., 2022     | Israel        | 533 undergraduate students of education submitted an online questionnaire before the lockdown and at its end.                                                                                                                                                                                                                                     | 533  | Prospective cohort    | Mini Sleep Questionnaire                                                             | Sleep quality                         | Levels of sleep quality (mean 5.34 [SD 0.92] vs mean 5.12 [SD 0.46], P=.02) and well-being (mean 3.79 [SD 0.62] vs mean 3.67 [SD 0.59], P=.02) were higher during the COVID-19 lockdown. These findings indicate that undergraduate students seem to have taken advantage of the change in lifestyle due to the lockdown, directing the free time toward improving health by engaging in more physical activity, thus improving sleep quality and well-being. |
| Kheirallah et al., 2021 | Jordan        | 1,404 students participated in the current study. About two-thirds (59.9%) of participants were females, 64.9% were enrolled at the two well-established medical schools at the University of Jordan (39.1%) and Jordan University of Science and Technology (JUST) (25.8%), and 59.6% were in the pre-clinical stage of their medical education. | 1404 | Cross-sectional study | Survey items developed by the study's author including questions on sleep disorders. | Sleep disorder (insomnia, nightmares) | About 13% of students self-reported experiencing increased insomnia, shallow sleep, nightmares, or insufficient sleep. In general, females self-reported experiencing significantly more sleeping problems than males. Likewise, students in the pre-clinical years experienced sleep problems (insomnia, shallow sleep, and insufficient sleep) significantly more frequently than those in their clinical years.                                            |
| Meo et al., 2022        | Saudia Arabia | The total number of medical and science students included was 782, out of whom 410 (52.4%) were medical                                                                                                                                                                                                                                           | 782  | Cross-sectional Study | Pittsburgh Sleep Quality Index,                                                      | Sleep quality<br>Sleep duration       | Out of 782 participants, 669 (85.55%) had poor sleep quality (≥5 Global PSQI score), while only 113 students had good sleep quality (<5 Global PSQI score). Out of 410 medical students, 336 (81.95%) had poor sleep quality, and 74                                                                                                                                                                                                                          |

|                               |              |                                                                                                                                                                                                                                                                                                                                                |      |                       |                                                                                     |                                        |                                                                                                                                                                                                                                                                                                                                                                                                                                                                                                                                                                                                                                                                                                   |
|-------------------------------|--------------|------------------------------------------------------------------------------------------------------------------------------------------------------------------------------------------------------------------------------------------------------------------------------------------------------------------------------------------------|------|-----------------------|-------------------------------------------------------------------------------------|----------------------------------------|---------------------------------------------------------------------------------------------------------------------------------------------------------------------------------------------------------------------------------------------------------------------------------------------------------------------------------------------------------------------------------------------------------------------------------------------------------------------------------------------------------------------------------------------------------------------------------------------------------------------------------------------------------------------------------------------------|
|                               |              | students, and 372 (47.6%) were science students, including Physics, Chemistry, Mathematics, Statistics, Botany, and Zoology. Among medical students, 143 (34.9%) were in pre-clinical years (1st and 2nd), while 266 (64.9%) of them were in clinical years 3rd, 4th, and 5th-year medical students. Female students were 65.3% of the sample. |      |                       |                                                                                     |                                        | (18.05%) had good sleep quality. While out of 372 science students, 333 (89.5%) had poor sleep quality, and 39 (10.5%) had good sleep quality. Overall, it was seen that the sleep quality of science students was poorer (Mean Global PSQI score= 8.78) than their medical counterparts (mean Global PSQI score= 7.93)<br><br>Sleep quality, sleep duration, and daytime dysfunction were poorer among pre-clinical students than clinical students<br><br>Out of the selected cases with poor sleep quality ( $\geq 5$ PSQI score), 32.1% were males, and 67.9% were females.<br><br>It was found that sleep disturbance and daytime dysfunction were poorer in students with higher BMI ranges |
| Nakhostin-Ansari et al., 2020 | Iran         | 323 medical students have completed the questionnaire (response rate = 64.6%); 37.2% of them were clerks and 62.8% interns. The mean age of participants was 23.73 (SD = 1.62), and 47.7% of them were male and 52.3% female.                                                                                                                  | 323  | Cross-sectional study | Survey items developed by the study's author including questions on sleep patterns. | Sleep disorder (sleep pattern changes) | Changes in sleep pattern (74.3%)                                                                                                                                                                                                                                                                                                                                                                                                                                                                                                                                                                                                                                                                  |
| Saadeh et al., 2021           | Jordan       | 6,157 undergraduate students (mean age $19.79 \pm 1.67$ years, males 28.7%) from the University of Jordan                                                                                                                                                                                                                                      | 6157 | Cross-sectional study | Pittsburgh Sleep Quality Index,                                                     | Sleep quality                          | The sleep quality of three-quarters of the participants was negatively affected by the extended quarantine. Nearly half of the participants reported poor sleep quality. The prevalence of poor sleep quality among participants was 76% (males: 71.5% and females: 77.8%).                                                                                                                                                                                                                                                                                                                                                                                                                       |
| Sarsak et al., 2022           | Saudi Arabia | A total of 244 students completed the survey (60.7% were female). The mean age was $22.10 \pm 2.69$                                                                                                                                                                                                                                            | 244  | Cross-sectional study | Survey items developed by the study's author include questions on                   | Sleep quality                          | 34.5% (n=84) reported sleeping late and waking up more frequently.                                                                                                                                                                                                                                                                                                                                                                                                                                                                                                                                                                                                                                |

|                    |        |                                                                                                                                   |     |                       |                                                                                                     |               |                                                                                                                                                        |
|--------------------|--------|-----------------------------------------------------------------------------------------------------------------------------------|-----|-----------------------|-----------------------------------------------------------------------------------------------------|---------------|--------------------------------------------------------------------------------------------------------------------------------------------------------|
|                    |        |                                                                                                                                   |     |                       | sleep disturbances.                                                                                 |               |                                                                                                                                                        |
| Torun et al., 2020 | Turkey | 275 students. About 60.7% of the participants (n = 167) were female, 39.3% (n = 108) were male and the mean age was 22.10 ± 2.69. | 275 | Cross-sectional study | Survey items developed by the study's author include questions on sleep duration and sleep quality. | Sleep quality | After the COVID-19 pandemic, the sleep patterns of the participants changed as 29.5% (n = 81) asleep late, wake up frequently and can not fall asleep. |

| Children              |                   |                                                                                                                                                                                                                                                                      |             |                       |                                                                                                          |                                 |                                                                                                                                                                                                                                                                                                                                       |
|-----------------------|-------------------|----------------------------------------------------------------------------------------------------------------------------------------------------------------------------------------------------------------------------------------------------------------------|-------------|-----------------------|----------------------------------------------------------------------------------------------------------|---------------------------------|---------------------------------------------------------------------------------------------------------------------------------------------------------------------------------------------------------------------------------------------------------------------------------------------------------------------------------------|
| Reference             | Location of Study | Population                                                                                                                                                                                                                                                           | Sample Size | Study Design          | Sleep Health Measurement Tool                                                                            | Sleep Health Domains            | Main Findings                                                                                                                                                                                                                                                                                                                         |
| Alanazi et al., 2022  | Saudi Arabia      | A total of 1021 parents completed the survey, of which 78.8% were Saudis. Fifty-five per cent of respondents were mothers with an average age of 41 (±9.2) years. The mean age of the children was 8.5 (±1.85) years. Sixty per cent of the study sample were girls. | 1021        | Cross-sectional study | Survey items developed by the study's author including questions on sleeping duration and sleep quality. | Sleep duration<br>Sleep quality | Slightly more than half the children met the sleep recommendations (95% CI 52.9, 60.9)<br>Sleep quality was reasonably high (average of 5.4 [2.26] points out of 7.0)<br>Weak negative correlation between parent education level and the quality of their child's sleep (r = -0.11, p < 0.0001)                                      |
| Almhizai et al., 2021 | Saudi Arabia      | Questionnaire was completed by 1141 respondents. Of these, 454 were < 18 years old (360 were aged 16 - 18 years old, and 94 were < 15 years old). Thus, these respondents                                                                                            | 1141        | Cross-sectional study | Survey items developed by the study's author including questions on sleep quality and sleep duration.    | Sleep quality<br>Sleep duration | Higher age was associated with higher increase in the frequency of waking up (r = 0.076, P < 0.05), sleeping little (r = 0.058, P < 0.05)<br>Having relatives who were infected with COVID-19 was associated with sleeping little (r = 0.074, P < 0.01)<br>Children whose parents were divorced had higher scores on sleep disorders. |

|                          |              |                                                                                                                                                                                                                                                                                                                                                  |      |                       |                                                                                                                               |                                 |                                                                                                                                                                                       |
|--------------------------|--------------|--------------------------------------------------------------------------------------------------------------------------------------------------------------------------------------------------------------------------------------------------------------------------------------------------------------------------------------------------|------|-----------------------|-------------------------------------------------------------------------------------------------------------------------------|---------------------------------|---------------------------------------------------------------------------------------------------------------------------------------------------------------------------------------|
|                          |              | completed the questionnaire on behalf of themselves. The remaining 688 respondents were adults and completed the questionnaire on behalf of their children. Male and female children represented 42.5% and 57.5% of the study sample.                                                                                                            |      |                       |                                                                                                                               |                                 |                                                                                                                                                                                       |
| Almugti et al., 2021     | Saudi Arabia | 651 participants in total; slightly over half (58%) were female. The respondents answered questions related to their children. These items showed that the mean age of their children was 9±4 years, the majority of the children were living in apartments (63.9%), and that 89% of the children were living with both their father and mother. | 651  | Cross-sectional study | Survey items developed from a similar study on Arab Israeli children including questions on sleep quality and sleep duration. | Sleep duration<br>Sleep quality | During the COVID-19 outbreak, one-third of children had asked to sleep in their parents' beds. Study reports reduced sleep time among children compared with the pre-pandemic period. |
| Al-Rahamneh et al., 2021 | Jordan       | Data collected from 1309 parents (mothers = 1219 (93.1%); fathers = 90 (6.9%) children (n = 1309 male = 716 (54.7%) and female = 593 (45.3%)), they were between 5–11 years of age (8.1 ± 2.02 years) and most of them were studying at private schools (92.7%).                                                                                 | 1309 | Cross-sectional study | Children's emotional and behavioral symptoms questionnaire                                                                    | Sleep duration                  | 42.5% of children had 8 h or less of sleep per night, which is considered as a short sleeping duration.                                                                               |
| Bucak et                 | Adiyaman,    | Group 1 (school age                                                                                                                                                                                                                                                                                                                              | 372  | Comparati             | Children's Sleep                                                                                                              | Child's sleep                   | Total CSHQ scores were 41.57 ± 7.57 (20–60) in                                                                                                                                        |

|                       |        |                                                                                                                                                                                                                                                                                                     |     |                       |                                             |                                                                                                                                                                                                                 |                                                                                                                                                                                                                                                                                                                                                     |
|-----------------------|--------|-----------------------------------------------------------------------------------------------------------------------------------------------------------------------------------------------------------------------------------------------------------------------------------------------------|-----|-----------------------|---------------------------------------------|-----------------------------------------------------------------------------------------------------------------------------------------------------------------------------------------------------------------|-----------------------------------------------------------------------------------------------------------------------------------------------------------------------------------------------------------------------------------------------------------------------------------------------------------------------------------------------------|
| al.,2021              | Turkey | children of health worker parents): 122 participants, 66 (54.1%) females and 56 (45.9%) males<br>Group 2 (school age children of non-health worker parents): 250 participants, 129 (51.6%) females and 121 (48.4%) males                                                                            |     | ve study              | Habits Questionnaire (CSQH)                 | habits and sleep-related problems. 8 subscales included*: bedtime resistance, sleep onset delay, sleep duration, sleep anxiety, night wakings, parasomnias, sleep disordered breathing, and daytime somnolence. | Group 1 and 39.6 ± 8.47 (17–68) in Group 2 (p:0.03)                                                                                                                                                                                                                                                                                                 |
| Cahal et al., 2021    | Israel | Mean (±SD) age of patients was 6.2 years (4.7) with a range of 0–18 years. 276 (62%) males and 169 (38%) females<br>368 (82%) had a single respiratory disorder, the most common of which were asthma (n=291, 65%), recurrent pneumonia (n=96, 21.5%), bronchopulmonary dysplasia (BPD; n=32, 7.2%) | 445 | Cross-sectional study | Anonymous electronic questionnaire          | Secondary outcomes related to patients' lifestyles                                                                                                                                                              | During the lockdown, Sleep duration increased in 59 patients (13.4%), decreased in 227 patients (51.1%) and remained unchanged in 155 patients (35.1%). Older patients experienced increased screen time, decreased physical activity, and shorter sleep duration (p = .008, <.001, and <.001, respectively) compared to their younger counterparts |
| El Refay et al., 2021 | Egypt  | 765 responses were received from children and adolescents aged 4–16 years. 408 children (53.3%) were males and 357 participants (46.7%) were females. More than half of the participants                                                                                                            | 765 | Cross-sectional study | Sleep Disturbance Scale for Children score. | Sleep quality<br>Sleep disorder                                                                                                                                                                                 | The overall mean Sleep Disturbance Scale for Children score (SDSC) in participated groups was 44.6 ± 11.72 suggesting a widespread stressful impact of the lockdown<br>Only 25 (3.2%) of participants had an (SDSC) over 70 which indicate acute severe sleep disorder<br>502 (65.6%) showed the symptoms suggestive of sleep disorder.             |

|                       |        |                                                                                                                                                                                                                                                                                                                    |     |                       |                                                                                                       |                                                                      |                                                                                                                                                                                                                                                                                                                                                                                                                                                                                                                                                                                                                                                                          |
|-----------------------|--------|--------------------------------------------------------------------------------------------------------------------------------------------------------------------------------------------------------------------------------------------------------------------------------------------------------------------|-----|-----------------------|-------------------------------------------------------------------------------------------------------|----------------------------------------------------------------------|--------------------------------------------------------------------------------------------------------------------------------------------------------------------------------------------------------------------------------------------------------------------------------------------------------------------------------------------------------------------------------------------------------------------------------------------------------------------------------------------------------------------------------------------------------------------------------------------------------------------------------------------------------------------------|
|                       |        | 407 (53.2%) were enrolled in primary schools.                                                                                                                                                                                                                                                                      |     |                       |                                                                                                       |                                                                      | Disorders of initiating and maintaining sleep were the most common among participants as 168 (33.4%) of them were suffering from it while 79 (15.7%) children were suffering from excessive somnolence.<br>Significant positive correlations were found between SDSC and extra screen usage, understanding safety and quarantine measures, anxiety signs, and change in child lifestyle with (p = 0.029, 0.010, 0.001 and 0.001) sequentially<br>Significant positive correlation was found between family income affection and sleep disorder score (p =0.04)                                                                                                           |
| Ghanamah et al., 2021 | Israel | 382 parents answered a survey about their children.<br>51% of the children were males, the most representative grade was the first grade (21.2%), 11.8% of the children were detected in COVID-19 and 43.5% of the children were asked to be in isolation since they had been exposed to COVID-19 diagnosed person | 382 | Cross-sectional study | Survey items developed by the study's author including questions on sleep duration and sleep quality. | Sleep duration<br>Sleep quality                                      | 55.8% of the children, who before the pandemic outbreak used to sleep alone in their own bedroom, asked the parents to sleep in their parents' bed during the outbreak period.<br><br>41.4% showed sleep difficulties. (more in kindergarteners than in pre-kindergarteners)<br><br>More hours spent in sleep through the outbreak compared to before the outbreak<br><br>If the child was in isolation, those children asked their parents to sleep beside them more than the children who were not asked to be in isolation. In the families with diagnosed Coronavirus, the children asked to sleep beside the parents more than in families with no diagnosed member |
| Kaditis et al., 2021  | Global | 45.8% female; ages 3–17 years                                                                                                                                                                                                                                                                                      | 845 | Longitudinal study    | Online survey                                                                                         | Change in bedtime, change in wake time, and change in sleep duration | As a result of the observed shift in bedtime and wake time, the median sleep duration score on weekdays increased significantly during the pandemic compared to before (p < .001), while there was no significant change during the weekend (p = .51). More children had an increase in sleep duration on weekdays than a decrease, whereas similar proportions of children had an increase or a decrease on weekends. Increase in sleep duration during the pandemic was most apparent in the 14–17 years age group during weekdays, while a                                                                                                                            |

|                          |         |                                                                                                                                                                                                                                 |       |                       |                                                                                                     |                                                          |                                                                                                                                                                                                                                                                                                                                                                                                                                                                                                                                                                                                                                                                                                                                                           |
|--------------------------|---------|---------------------------------------------------------------------------------------------------------------------------------------------------------------------------------------------------------------------------------|-------|-----------------------|-----------------------------------------------------------------------------------------------------|----------------------------------------------------------|-----------------------------------------------------------------------------------------------------------------------------------------------------------------------------------------------------------------------------------------------------------------------------------------------------------------------------------------------------------------------------------------------------------------------------------------------------------------------------------------------------------------------------------------------------------------------------------------------------------------------------------------------------------------------------------------------------------------------------------------------------------|
|                          |         |                                                                                                                                                                                                                                 |       |                       |                                                                                                     |                                                          | decrease in sleep duration was most prominent in 3- to 5-year-old children during both weekdays and weekends. Sleep duration did not change in 43% of participants on weekdays and 46.2% on weekends. Children aged 14–17 years were the least likely to have unchanged sleep duration on weekdays (28.4%).                                                                                                                                                                                                                                                                                                                                                                                                                                               |
| Kamaleddine et al., 2022 | Lebanon | 383 children whose parents agreed to use the responses for this study were finally included. The proportion of boys and girls was even.                                                                                         | 383   | Cross-sectional study | Children Sleep Habit Questionnaire                                                                  | Sleep quality                                            | Observed that children with screen time $\geq 2$ h had sleep problems.                                                                                                                                                                                                                                                                                                                                                                                                                                                                                                                                                                                                                                                                                    |
| Mekkawy et al., 2022     | Egypt   | Participants in this study (n=672) were divided according to age into 4 main categories, 6–9 years (21.7%), 9–12 years (24.4%), 12–15 years (30.1%) and 15–18 years (23.8%). Males represented 48.2% and females 51.8%          | 672   | Cross-sectional study | BEARS sleep screening tool                                                                          | Sleep duration<br>Sleep quality<br>Sleep disorders       | 50% reported increase in their sleeping habit, 31.8% reported no change while 45.2% stated no sleeping problems, 19% had a difficulty to fall asleep, 16.1% had a problem waking up during sleep, 11.9% had a problem waking up feeling tired, & 7.7% had a problem sleeping too much . When comparing the sleep habits pre COVID-19 with the lockdown, results had shown significant decrease in the % of sleeping less than 7 hours from 41.4% to 5.4%, while there was significant increase in the % of sleeping more than 10 hours from 4.8% to 49.7% (p<0.001). On the other hand, the energy level status of being energized significantly decreased from 55.4% to 7.7%, and significantly increased in the lazy state from 3.6% to 54.8% (p<0.001) |
| Ranjbar et al., 2021     | Iran    | 20697 filled questionnaires were received from the participants with an average age of 13.76 $\pm$ 2.50 which included 6139 (29.7%) male and 14558 (70.3%) females. Among the participants, 16672 (80.6%) were from urban areas | 20697 | Cross-sectional study | Survey items developed by the study's author include questions on sleep duration and sleep pattern. | Sleep duration<br>Sleep disorder (sleep pattern changes) | 2782 (13.4%) students had 5 or fewer hours of sleep, 2689 (13%) had 6 to 8 h, 2655 (12.8%) had 9 to 10 h, 1506 (7.3%) had 11 to 12 h, and 11065 (53.5%) had above 12 h of sleep throughout the day. The majority (8934: 43.2%) of students went to bed between 23 and 24 P.M. while the majority (11585: 56%) woke up at 8 A.M.                                                                                                                                                                                                                                                                                                                                                                                                                           |



|                          |        |                                                                                                                                                                                                                                                                                                                      |      |                       |                                                                                                       |                                                              |                                                                                                                                                                                                                                                                                                                                                                                                                                                                                                                                                                                                                                                                                      |
|--------------------------|--------|----------------------------------------------------------------------------------------------------------------------------------------------------------------------------------------------------------------------------------------------------------------------------------------------------------------------|------|-----------------------|-------------------------------------------------------------------------------------------------------|--------------------------------------------------------------|--------------------------------------------------------------------------------------------------------------------------------------------------------------------------------------------------------------------------------------------------------------------------------------------------------------------------------------------------------------------------------------------------------------------------------------------------------------------------------------------------------------------------------------------------------------------------------------------------------------------------------------------------------------------------------------|
|                          |        | and 4025 (19.4%) from rural areas.                                                                                                                                                                                                                                                                                   |      |                       |                                                                                                       |                                                              |                                                                                                                                                                                                                                                                                                                                                                                                                                                                                                                                                                                                                                                                                      |
| Ustuner Top et al., 2022 | Turkey | Of the 1040 children, 528 (50.8%) males and 512 (49.2%) females were included in the analyses. The mean age of the children was $9.16 \pm 2.05$ , and 80.3% were aged between 9 and 12 years.                                                                                                                        | 1040 | Cross-sectional study | The Children's Sleep Habits Questionnaire                                                             | Sleep quality<br>Sleep duration<br>Sleep disorder            | The prevalence of sleep disturbances among 6–12-year-old children during the COVID-19 pandemic in Turkey was 55.5%.<br>Sleep disturbances were found to be significantly associated with 6–8 years of age, and poor family relationships ( $p < 0.05$ ).<br><br>The most common sleep disturbances were bedtime resistance (51.9%), sleep onset delay (61.4%), and sleep duration (90.2%). The children's ages, family relationships, and eating habits were linked to their sleep disturbances. Moreover, their results indicated that sleep disturbances were more common in the children of parents who felt helpless, apprehensive, and frightened during the COVID-19 pandemic. |
| Zengin et al., 2021      | Turkey | 309 children. The average age of the children in the study was $10.3 \pm 1.2$ ; 52.1% of participants were male.                                                                                                                                                                                                     | 309  | Cross-sectional study | Survey items developed by the study's author including questions on sleep duration and sleep quality. | Sleep duration<br>Sleep quality                              | Children stated that due to the pandemic they experienced changes in terms of sleep (61.5%; $n = 190$ )<br><br>Some of the children in the present study stated that their sleeping habits have become irregular, and the majority of them had reduced their time for social activity. These findings are similar to our results.                                                                                                                                                                                                                                                                                                                                                    |
| Zreik et al., 2021       | Israel | Mothers of 264 children (120 boys), with a mean (SD, range) age of 31.27 (17.39, 6–72) months, participated in the study: 100 of the mothers were Arab and 141 were Jewish. Approximately 38% of the infants were firstborns, and families had a mean (SD) of 2.15 (0.95) children. The mean (SD) age of the mothers | 264  | Cross-sectional study | Insomnia Severity Index<br><br>Brief Infant/Child Sleep Questionnaire                                 | Sleep disorder (insomnia)<br>Sleep quality<br>Sleep duration | The majority of mothers reported no change in their child's sleep quality, duration, and sleeping arrangement. However, about 30% reported a negative change in child's sleep quality and a decrease in sleep duration, and there were also mothers who reported a positive change.<br><br>60% of the mothers reported a negative change in their sleep quality. In all, 23% of mothers scored above the clinical cut-off for insomnia (ISI score of $>15$ ) during the COVID-19 crisis, compared to only 11% who reported (retrospectively) having clinical insomnia before the COVID-19 crisis ( $\chi^2 (1) = 5.36$ ,                                                             |

1  
2  
3  
4  
5  
6  
7  
8  
9  
10  
11  
12  
13  
14  
15  
16  
17  
18  
19  
20  
21  
22  
23  
24  
25  
26  
27  
28  
29  
30  
31  
32  
33  
34  
35  
36  
37  
38  
39  
40  
41  
42  
43  
44  
45  
46  
47

|  |  |                                |  |  |  |                                                                                                                                                                                                                                                                                                                                                                                                                                                                                                                                                                                                                                                                                                                                                                                                                                                                                                                                                                                                                                                                                                                                                                                                                                                                                                                                                                                                                                                                                                                                                                                                                |
|--|--|--------------------------------|--|--|--|----------------------------------------------------------------------------------------------------------------------------------------------------------------------------------------------------------------------------------------------------------------------------------------------------------------------------------------------------------------------------------------------------------------------------------------------------------------------------------------------------------------------------------------------------------------------------------------------------------------------------------------------------------------------------------------------------------------------------------------------------------------------------------------------------------------------------------------------------------------------------------------------------------------------------------------------------------------------------------------------------------------------------------------------------------------------------------------------------------------------------------------------------------------------------------------------------------------------------------------------------------------------------------------------------------------------------------------------------------------------------------------------------------------------------------------------------------------------------------------------------------------------------------------------------------------------------------------------------------------|
|  |  | <p>was 33.97 (4.20) years.</p> |  |  |  | <p>p = .02).</p> <p>The current maternal ISI score was positively correlated with child's sleep latency, number of night awakenings, and wake after sleep onset, and was negatively correlated with sleep duration. Maternal acute COVID-19 anxiety was positively correlated with the child's number of night awakenings, and negatively correlated with the child's sleep duration. When examining the correlations between the current maternal ISI score and child's sleep variables with maternal acute COVID-19 anxiety as a covariate, the correlations with child's sleep variables, number of night awakenings and WASO, remained significant (r = .26, p = .001 and r = .31, p &lt; .001, respectively), while the correlations with child's sleep latency and sleep duration were no longer significant.</p> <p>The correlation between maternal acute COVID-19 anxiety and the current maternal ISI score was significant (r = .38, p &lt; .001) and remained significant after controlling for the child's sleep duration, number of night awakenings, and WASO (r = .40, p &lt; .001)</p> <p>The change in child's sleep quality was associated with the change in ISI score of the mother (r s = -.33, p &lt; .001), so that mothers who reported that their child's sleep improved during the COVID-19 crisis, were more likely to report a decrease in their own insomnia symptoms during the crisis.</p> <p>Mothers who reported that their child's sleep had negatively changed had higher levels of anxiety traits, compared to mothers who reported no change in their child's sleep.</p> |
|--|--|--------------------------------|--|--|--|----------------------------------------------------------------------------------------------------------------------------------------------------------------------------------------------------------------------------------------------------------------------------------------------------------------------------------------------------------------------------------------------------------------------------------------------------------------------------------------------------------------------------------------------------------------------------------------------------------------------------------------------------------------------------------------------------------------------------------------------------------------------------------------------------------------------------------------------------------------------------------------------------------------------------------------------------------------------------------------------------------------------------------------------------------------------------------------------------------------------------------------------------------------------------------------------------------------------------------------------------------------------------------------------------------------------------------------------------------------------------------------------------------------------------------------------------------------------------------------------------------------------------------------------------------------------------------------------------------------|

**Patients With Chronic Illnesses**

| Reference              | Location of Study | Population                                                                                                                                                                                                                                                                                                           | Sample Size | Study Design          | Sleep Health Measurement Tool                                                                         | Sleep Health Domains                                    | Main Findings                                                                                                                                                                                                                                                                                                                            |
|------------------------|-------------------|----------------------------------------------------------------------------------------------------------------------------------------------------------------------------------------------------------------------------------------------------------------------------------------------------------------------|-------------|-----------------------|-------------------------------------------------------------------------------------------------------|---------------------------------------------------------|------------------------------------------------------------------------------------------------------------------------------------------------------------------------------------------------------------------------------------------------------------------------------------------------------------------------------------------|
| Alkhotani et al., 2020 | Saudi Arabia      | A total of 156 patients with epilepsy completed the questionnaire. Sixty-two percent of our responders were female patients, 99% were living with family, 38% had generalized seizures, 47% were on single medications, and 48.1% had been seizure-free for the past three months prior to the start of the pandemic | 156         | Cross-sectional study | Survey items developed by the study's author including questions on sleep duration and sleep quality. | Sleep duration<br>Sleep quality                         | (71.2%) experienced a significant change in their sleep. Most frequent change in sleep was a reversal of the sleep pattern in 58% of the respondents (sleep after sunrise), followed by more sleep than usual in 9.6%, less sleep in 2.6%, and intermittent sleep in 0.6%.                                                               |
| Athamneh et al., 2021  | Jordan            | 506 (90.03%) neurology patients responded to the questionnaire. Patients under 40 years of age constituted over half the sample. Men constituted 45.45% of the sample.                                                                                                                                               | 506         | Cross-sectional study | Survey items developed by the study's author including questions on sleep duration.                   | Sleep quality<br>Sleep disorder (Sleep pattern changes) | Sleep disturbances were reported by nearly one in three patients who had epilepsy or headache, and the majority ascribed these disturbances to the impact of the pandemic. Changes in sleep patterns were reported by 37.50% of patients with tension/migraine headaches, and 50.00% blamed these changes to the impact of the pandemic. |
| Çolak et al., 2021     | Turkey            | Pregnant women mean age 30.17 ± 5.47 years                                                                                                                                                                                                                                                                           | 149         | Cross-sectional study | Pittsburgh Sleep Quality Index (PSQI)                                                                 | Sleep quality                                           | The depression, anxiety, and defective sleep quality levels of the participants who were previously in the home quarantine were statistically significantly higher ( $p < 0.001$ , $p < 0.001$ , $p < 0.001$ , respectively).                                                                                                            |
| Güç et al., 2022       | Turkey            | Of the 761 cancer patients, 480 (63.1%) are female and 281 (36.9%) are male. At the time of the study, their median age was 57.65 years (range, 20–90).                                                                                                                                                              | 761         | Cross-sectional study | Pittsburgh Sleep Quality Index                                                                        | Sleep quality                                           | Mean scores of the 761 participants PSQI, 5.67 ± 4.24 (range, 0–19). Quality of sleep was found bad in 447 (58.7%) (global score ≥5). Multivariate analyses showed active treatment (OR: 21.4; 95% CI: 9.08–50.4; $p < 0.001$ ) as the major independent variable that affected sleep quality                                            |
| Karatel et al., 2022   | Turkey            | The study includes 1,778 responses of 1,131                                                                                                                                                                                                                                                                          | 1778        | Cross-sectional       | Pittsburgh Sleep Quality Index                                                                        | Sleep quality                                           | The PSQI-total had shown a weak correlation with pain levels in all body parts.                                                                                                                                                                                                                                                          |

|                     |        |                                                                                                                                                                                                     |      |                       |                                                                                   |                             |                                                                                                                                                                                                                                                                                                                                                                                                                        |
|---------------------|--------|-----------------------------------------------------------------------------------------------------------------------------------------------------------------------------------------------------|------|-----------------------|-----------------------------------------------------------------------------------|-----------------------------|------------------------------------------------------------------------------------------------------------------------------------------------------------------------------------------------------------------------------------------------------------------------------------------------------------------------------------------------------------------------------------------------------------------------|
|                     |        | (63.6%) women and 647 (36.4%) men. Mean age was 28.3 ± 10.7 years with musculoskeletal pain                                                                                                         |      | study                 |                                                                                   |                             | The highest correlation for sleep quality and pain levels was between the PSQI-5 and lower back pain. There was a weak correlation between PSQI-2 and the BDI score, and a moderate correlation between the PSQI-1, PSQI-5, PSQI-7, PSQI-total, and BDI score.                                                                                                                                                         |
| Keskin et al., 2022 | Turkey | 356 pregnant women were enrolled and completed the survey                                                                                                                                           | 356  | Cross-sectional study | The Epworth sleepiness scale                                                      | Sleep disorder (sleepiness) | Mild sleepiness was found in 88.2% and severe sleepiness in 11.8% of the pregnant women                                                                                                                                                                                                                                                                                                                                |
| San et al., 2021    | Turkey | 145 patients who underwent a spine intervention within the past year were included in this study, there were 96 women (66%) and 49 men (34%), with a mean age of 54.78 ± 1.08 years.                | 145  | Cross-sectional study | Survey items developed by the study's author include questions on sleep habits.   | Sleep quality               | 24 patients always had sleep disturbance, 30 patients often had sleep disturbance, 37 patients sometimes had sleep disturbance, 9 patients rarely had sleep disturbance, and 45 patients had no sleep disturbance                                                                                                                                                                                                      |
| Seyahi et al., 2020 | Turkey | Studied in total 771 (245 M/ 526 F) patients with Rheumatic disease (Group 1), 535 (181 M/ 354 F) hospital workers (Group 2) and 917 (258 M/ 659 F) teachers/academic staff (Group 3)               | 2223 | Cross-sectional study | Survey items developed by the study's author include questions on sleep problems. | Sleep disorder              | The frequency of sleep problems in patients with RD was significantly higher than that of the teachers/academic staff, but then again, significantly lower than that reported in the hospital workers.                                                                                                                                                                                                                 |
| Yeni et al., 2022   | Turkey | 89 PwMS (people with multiple sclerosis) and 262 healthy controls. Mean age of PwMS was 41.08 (±10.2) years; 62% were female. Mean age of the control group was 38.08 (±11.4) and 51.5% were female | 351  | Cross-sectional       | Pittsburgh Sleep Quality Index (PSQI)                                             | Sleep quality               | Healthy controls (HC): Compared to pre-pandemic period, the mean PSQI score was determined to increase indicating impaired sleep quality (p<0.001) Sleep quality of the patients was seen to be impaired during the pandemic (p<0.05) Multiple regression analysis demonstrated that the anxiety, depression, and the sleep problems were predictors of both the physical health (p<0.001) and mental health (p<0.001) |

1  
2  
3  
4  
5  
6  
7  
8  
9  
10  
11  
12  
13  
14  
15  
16  
17  
18  
19  
20  
21  
22  
23  
24  
25  
26  
27  
28  
29  
30  
31  
32  
33  
34  
35  
36  
37  
38  
39  
40  
41  
42  
43  
44  
45  
46  
47  
48  
49  
50  
51  
52  
53  
54  
55  
56  
57  
58  
59  
60

For peer review only

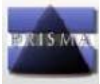

## PRISMA 2020 Checklist

| Section and Topic             | Item # | Checklist item                                                                                                                                                                                                                                                                                       | Location where item is reported |
|-------------------------------|--------|------------------------------------------------------------------------------------------------------------------------------------------------------------------------------------------------------------------------------------------------------------------------------------------------------|---------------------------------|
| <b>TITLE</b>                  |        |                                                                                                                                                                                                                                                                                                      |                                 |
| Title                         | 1      | Identify the report as a systematic review.                                                                                                                                                                                                                                                          | 1                               |
| <b>ABSTRACT</b>               |        |                                                                                                                                                                                                                                                                                                      |                                 |
| Abstract                      | 2      | See the PRISMA 2020 for Abstracts checklist.                                                                                                                                                                                                                                                         | 2                               |
| <b>INTRODUCTION</b>           |        |                                                                                                                                                                                                                                                                                                      |                                 |
| Rationale                     | 3      | Describe the rationale for the review in the context of existing knowledge.                                                                                                                                                                                                                          | 4                               |
| Objectives                    | 4      | Provide an explicit statement of the objective(s) or question(s) the review addresses.                                                                                                                                                                                                               | 4                               |
| <b>METHODS</b>                |        |                                                                                                                                                                                                                                                                                                      |                                 |
| Eligibility criteria          | 5      | Specify the inclusion and exclusion criteria for the review and how studies were grouped for the syntheses.                                                                                                                                                                                          | 5                               |
| Information sources           | 6      | Specify all databases, registers, websites, organisations, reference lists and other sources searched or consulted to identify studies. Specify the date when each source was last searched or consulted.                                                                                            | 5                               |
| Search strategy               | 7      | Present the full search strategies for all databases, registers and websites, including any filters and limits used.                                                                                                                                                                                 | Supplementary S1                |
| Selection process             | 8      | Specify the methods used to decide whether a study met the inclusion criteria of the review, including how many reviewers screened each record and each report retrieved, whether they worked independently, and if applicable, details of automation tools used in the process.                     | 5                               |
| Data collection process       | 9      | Specify the methods used to collect data from reports, including how many reviewers collected data from each report, whether they worked independently, any processes for obtaining or confirming data from study investigators, and if applicable, details of automation tools used in the process. | 5, 6                            |
| Data items                    | 10a    | List and define all outcomes for which data were sought. Specify whether all results that were compatible with each outcome domain in each study were sought (e.g. for all measures, time points, analyses), and if not, the methods used to decide which results to collect.                        | 5, 6                            |
|                               | 10b    | List and define all other variables for which data were sought (e.g. participant and intervention characteristics, funding sources). Describe any assumptions made about any missing or unclear information.                                                                                         | 5, 6                            |
| Study risk of bias assessment | 11     | Specify the methods used to assess risk of bias in the included studies, including details of the tool(s) used, how many reviewers assessed each study and whether they worked independently, and if applicable, details of automation tools used in the process.                                    | 6                               |
| Effect measures               | 12     | Specify for each outcome the effect measure(s) (e.g. risk ratio, mean difference) used in the synthesis or presentation of results.                                                                                                                                                                  | 5                               |
| Synthesis methods             | 13a    | Describe the processes used to decide which studies were eligible for each synthesis (e.g. tabulating the study intervention characteristics and comparing against the planned groups for each synthesis (item #5)).                                                                                 | 5                               |
|                               | 13b    | Describe any methods required to prepare the data for presentation or synthesis, such as handling of missing summary statistics, or data conversions.                                                                                                                                                | 5, 6                            |
|                               | 13c    | Describe any methods used to tabulate or visually display results of individual studies and syntheses.                                                                                                                                                                                               | 5, 6                            |
|                               | 13d    | Describe any methods used to synthesize results and provide a rationale for the choice(s). If meta-analysis was performed, describe the model(s), method(s) to identify the presence and extent of statistical heterogeneity, and software package(s) used.                                          | N/A                             |
|                               | 13e    | Describe any methods used to explore possible causes of heterogeneity among study results (e.g. subgroup analysis, meta-regression).                                                                                                                                                                 | N/A                             |
|                               | 13f    | Describe any sensitivity analyses conducted to assess robustness of the synthesized results.                                                                                                                                                                                                         | N/A                             |
| Reporting bias assessment     | 14     | Describe any methods used to assess risk of bias due to missing results in a synthesis (arising from reporting biases).                                                                                                                                                                              | 6                               |

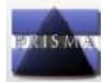

## PRISMA 2020 Checklist

| Section and Topic             | Item # | Checklist item                                                                                                                                                                                                                                                                       | Location where item is reported |
|-------------------------------|--------|--------------------------------------------------------------------------------------------------------------------------------------------------------------------------------------------------------------------------------------------------------------------------------------|---------------------------------|
| Certainty assessment          | 15     | Describe any methods used to assess certainty (or confidence) in the body of evidence for an outcome.                                                                                                                                                                                | 6                               |
| <b>RESULTS</b>                |        |                                                                                                                                                                                                                                                                                      |                                 |
| Study selection               | 16a    | Describe the results of the search and selection process, from the number of records identified in the search to the number of studies included in the review, ideally using a flow diagram.                                                                                         | 7, figure 1                     |
|                               | 16b    | Cite studies that might appear to meet the inclusion criteria, but which were excluded, and explain why they were excluded.                                                                                                                                                          | 7                               |
| Study characteristics         | 17     | Cite each included study and present its characteristics.                                                                                                                                                                                                                            | 7 – 11                          |
| Risk of bias in studies       | 18     | Present assessments of risk of bias for each included study.                                                                                                                                                                                                                         | Supplementary S3                |
| Results of individual studies | 19     | For all outcomes, present, for each study: (a) summary statistics for each group (where appropriate) and (b) an effect estimate and its precision (e.g. confidence/credible interval), ideally using structured tables or plots.                                                     | Supplementary S4                |
| Results of syntheses          | 20a    | For each synthesis, briefly summarise the characteristics and risk of bias among contributing studies.                                                                                                                                                                               | Pages 7 – 11, Supplementary S4  |
|                               | 20b    | Present results of all statistical syntheses conducted. If meta-analysis was done, present for each the summary estimate and its precision (e.g. confidence/credible interval) and measures of statistical heterogeneity. If comparing groups, describe the direction of the effect. | N/A                             |
|                               | 20c    | Present results of all investigations of possible causes of heterogeneity among study results.                                                                                                                                                                                       | N/A                             |
|                               | 20d    | Present results of all sensitivity analyses conducted to assess the robustness of the synthesized results.                                                                                                                                                                           | N/A                             |
| Reporting biases              | 21     | Present assessments of risk of bias due to missing results (arising from reporting biases) for each synthesis assessed.                                                                                                                                                              | Supplementary S3                |
| Certainty of evidence         | 22     | Present assessments of certainty (or confidence) in the body of evidence for each outcome assessed.                                                                                                                                                                                  | Supplementary S3                |
| <b>DISCUSSION</b>             |        |                                                                                                                                                                                                                                                                                      |                                 |
| Discussion                    | 23a    | Provide a general interpretation of the results in the context of other evidence.                                                                                                                                                                                                    | 12, 13                          |
|                               | 23b    | Discuss any limitations of the evidence included in the review.                                                                                                                                                                                                                      | 13, 14                          |
|                               | 23c    | Discuss any limitations of the review processes used.                                                                                                                                                                                                                                | 13, 14                          |
|                               | 23d    | Discuss implications of the results for practice, policy, and future research.                                                                                                                                                                                                       | 12 – 13                         |
| <b>OTHER INFORMATION</b>      |        |                                                                                                                                                                                                                                                                                      |                                 |
| Registration and protocol     | 24a    | Provide registration information for the review, including register name and registration number, or state that the review was not registered.                                                                                                                                       | 2, 5                            |
|                               | 24b    | Indicate where the review protocol can be accessed, or state that a protocol was not prepared.                                                                                                                                                                                       | 5                               |
|                               | 24c    | Describe and explain any amendments to information provided at registration or in the protocol.                                                                                                                                                                                      | N/A                             |
| Support                       | 25     | Describe sources of financial or non-financial support for the review, and the role of the funders or sponsors in the review.                                                                                                                                                        | 16                              |
| Competing interests           | 26     | Declare any competing interests of review authors.                                                                                                                                                                                                                                   | 16                              |
| Availability of               | 27     | Report which of the following are publicly available and where they can be found: template data collection forms; data extracted from included                                                                                                                                       | 16                              |

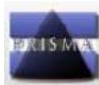

# PRISMA 2020 Checklist

1  
2  
3  
4  
5  
6  
7  
8  
9  
10  
11  
12  
13  
14  
15  
16  
17  
18  
19  
20  
21  
22  
23  
24  
25  
26  
27  
28  
29  
30  
31  
32  
33  
34  
35  
36  
37  
38  
39  
40  
41  
42  
43  
44  
45  
46  
47

| Section and Topic              | Item # | Checklist item                                                                              | Location where item is reported |
|--------------------------------|--------|---------------------------------------------------------------------------------------------|---------------------------------|
| data, code and other materials |        | studies; data used for all analyses; analytic code; any other materials used in the review. |                                 |

From: Page MJ, McKenzie JE, Bossuyt PM, Boutron I, Hoffmann TC, Mulrow CD, et al. The PRISMA 2020 statement: an updated guideline for reporting systematic reviews. *BMJ* 2021;372:n71. doi: 10.1136/bmj.n71

For more information, visit: <http://www.prisma-statement.org/>

For peer review only
